# Supplementary material for: rboAnalyzer: A Software to Improve Characterization of Non-coding RNAs From Sequence Database Search Output
Source: Front Genet. 2020 Jul 28;11:675. doi: 10.3389/fgene.2020.00675 (PMC7401326; doi:10.3389/fgene.2020.00675)
Supplement: Supplementary file 4 [file Data_Sheet_3.ZIP › u2_reg.fasta]

>u2_hs
AUCGCUUCUCGGCCUUUUGGCUAAGAUCAAGUGUAGUAUCUGUUCUUAUCAGUUUAAUAUCUGAUACGUCCUCUAUCCGAGGACAAUAUAUUAAAUGGAUUUUUGGAGCAGGGAGAUGGAAUAGGAGCUUGCUCUGUCCACUCCACGCAUCGACCUGGUAUUGCAGUACCUCCAGGACCGGUGCACUU
