# Supplementary material for: rboAnalyzer: A Software to Improve Characterization of Non-coding RNAs From Sequence Database Search Output
Source: Front Genet. 2020 Jul 28;11:675. doi: 10.3389/fgene.2020.00675 (PMC7401326; doi:10.3389/fgene.2020.00675)
Supplement: Supplementary file 4 [file Data_Sheet_3.ZIP › WNGTW72H014-Alignment_cnidaria.xml]

<?xml version="1.0"?>
<!DOCTYPE BlastOutput PUBLIC "-//NCBI//NCBI BlastOutput/EN" "http://www.ncbi.nlm.nih.gov/dtd/NCBI_BlastOutput.dtd">
<BlastOutput>
  <BlastOutput_program>blastn</BlastOutput_program>
  <BlastOutput_version>BLASTN 2.10.0+</BlastOutput_version>
  <BlastOutput_reference>Stephen F. Altschul, Thomas L. Madden, Alejandro A. Sch&amp;auml;ffer, Jinghui Zhang, Zheng Zhang, Webb Miller, and David J. Lipman (1997), &quot;Gapped BLAST and PSI-BLAST: a new generation of protein database search programs&quot;, Nucleic Acids Res. 25:3389-3402.</BlastOutput_reference>
  <BlastOutput_db>GPIPE/151771/100/ref_top_level GPIPE/1720309/101/ref_top_level GPIPE/45264/100/ref_top_level GPIPE/46731/100/ref_top_level GPIPE/48498/100/ref_top_level GPIPE/50429/100/ref_top_level GPIPE/6087/102/ref_top_level GPIPE/70779/100/ref_top_level genomic/45351/GCF_000209225.1</BlastOutput_db>
  <BlastOutput_query-ID>Query_49357</BlastOutput_query-ID>
  <BlastOutput_query-def>No definition line</BlastOutput_query-def>
  <BlastOutput_query-len>188</BlastOutput_query-len>
  <BlastOutput_param>
    <Parameters>
      <Parameters_expect>10</Parameters_expect>
      <Parameters_sc-match>2</Parameters_sc-match>
      <Parameters_sc-mismatch>-3</Parameters_sc-mismatch>
      <Parameters_gap-open>5</Parameters_gap-open>
      <Parameters_gap-extend>2</Parameters_gap-extend>
      <Parameters_filter>L;m;</Parameters_filter>
    </Parameters>
  </BlastOutput_param>
<BlastOutput_iterations>
<Iteration>
  <Iteration_iter-num>1</Iteration_iter-num>
  <Iteration_query-ID>Query_49357</Iteration_query-ID>
  <Iteration_query-def>No definition line</Iteration_query-def>
  <Iteration_query-len>188</Iteration_query-len>
<Iteration_hits>
<Hit>
  <Hit_num>1</Hit_num>
  <Hit_id>gi|1190469844|ref|NW_018384369.1|</Hit_id>
  <Hit_def>Exaiptasia pallida isolate CC7 unplaced genomic scaffold, Aiptasia genome 1.1 scaffold1243</Hit_def>
  <Hit_accession>NW_018384369</Hit_accession>
  <Hit_len>11480</Hit_len>
  <Hit_hsps>
    <Hsp>
      <Hsp_num>1</Hsp_num>
      <Hsp_bit-score>156.376</Hsp_bit-score>
      <Hsp_score>172</Hsp_score>
      <Hsp_evalue>4.90495e-36</Hsp_evalue>
      <Hsp_query-from>1</Hsp_query-from>
      <Hsp_query-to>173</Hsp_query-to>
      <Hsp_hit-from>1696</Hsp_hit-from>
      <Hsp_hit-to>1523</Hsp_hit-to>
      <Hsp_query-frame>1</Hsp_query-frame>
      <Hsp_hit-frame>-1</Hsp_hit-frame>
      <Hsp_identity>143</Hsp_identity>
      <Hsp_positive>143</Hsp_positive>
      <Hsp_gaps>5</Hsp_gaps>
      <Hsp_align-len>176</Hsp_align-len>
      <Hsp_qseq>ATCGCTTCTCGGCCTTTTGGCTAAGATCAAGTGTAGTATCTGTTCTTATCAGTTTAATATCTGATACG-TCCTCTATCCGAG--GACAATATATTAAATGGATTTTTGGAGCAGGGAGATGGAATAGGAGCTTGCTCTGTCCACTCCACGCATCGACCTGGTATTGCAGTACCTCC</Hsp_qseq>
      <Hsp_hseq>ATCGCTTCTCGGCCTTTTGGCTAAGATCAAGTGTAGTATCTGTTCTTATCAGCTTAATATCTGATACGCTGCTC-AT-CGAGTAGCTCATATATTAAACTGATTTTTGGAACTGGGCTGTGGAAAAGAGGCTTGCCTCGTCCCAGCCACGGGTTGTCTCGGTATTGCACTACCTCC</Hsp_hseq>
      <Hsp_midline>|||||||||||||||||||||||||||||||||||||||||||||||||||| ||||||||||||||| | ||| || ||||  |   ||||||||||  |||||||||| | |||   ||||| ||  ||||||   ||||   |||||  | | |  ||||||||| |||||||</Hsp_midline>
    </Hsp>
    <Hsp>
      <Hsp_num>2</Hsp_num>
      <Hsp_bit-score>156.376</Hsp_bit-score>
      <Hsp_score>172</Hsp_score>
      <Hsp_evalue>4.90495e-36</Hsp_evalue>
      <Hsp_query-from>1</Hsp_query-from>
      <Hsp_query-to>173</Hsp_query-to>
      <Hsp_hit-from>3280</Hsp_hit-from>
      <Hsp_hit-to>3107</Hsp_hit-to>
      <Hsp_query-frame>1</Hsp_query-frame>
      <Hsp_hit-frame>-1</Hsp_hit-frame>
      <Hsp_identity>143</Hsp_identity>
      <Hsp_positive>143</Hsp_positive>
      <Hsp_gaps>5</Hsp_gaps>
      <Hsp_align-len>176</Hsp_align-len>
      <Hsp_qseq>ATCGCTTCTCGGCCTTTTGGCTAAGATCAAGTGTAGTATCTGTTCTTATCAGTTTAATATCTGATACG-TCCTCTATCCGAG--GACAATATATTAAATGGATTTTTGGAGCAGGGAGATGGAATAGGAGCTTGCTCTGTCCACTCCACGCATCGACCTGGTATTGCAGTACCTCC</Hsp_qseq>
      <Hsp_hseq>ATCGCTTCTCGGCCTTTTGGCTAAGATCAAGTGTAGTATCTGTTCTTATCAGCTTAATATCTGATACGCTGCTC-AT-CGAGTAGCTCATATATTAAACTGATTTTTGGAACTGGGCTGTGGAAAAGAGGCTTGCCTCGTCCCAGCCACGGGTTGTCTCGGTATTGCACTACCTCC</Hsp_hseq>
      <Hsp_midline>|||||||||||||||||||||||||||||||||||||||||||||||||||| ||||||||||||||| | ||| || ||||  |   ||||||||||  |||||||||| | |||   ||||| ||  ||||||   ||||   |||||  | | |  ||||||||| |||||||</Hsp_midline>
    </Hsp>
    <Hsp>
      <Hsp_num>3</Hsp_num>
      <Hsp_bit-score>156.376</Hsp_bit-score>
      <Hsp_score>172</Hsp_score>
      <Hsp_evalue>4.90495e-36</Hsp_evalue>
      <Hsp_query-from>1</Hsp_query-from>
      <Hsp_query-to>173</Hsp_query-to>
      <Hsp_hit-from>4864</Hsp_hit-from>
      <Hsp_hit-to>4691</Hsp_hit-to>
      <Hsp_query-frame>1</Hsp_query-frame>
      <Hsp_hit-frame>-1</Hsp_hit-frame>
      <Hsp_identity>143</Hsp_identity>
      <Hsp_positive>143</Hsp_positive>
      <Hsp_gaps>5</Hsp_gaps>
      <Hsp_align-len>176</Hsp_align-len>
      <Hsp_qseq>ATCGCTTCTCGGCCTTTTGGCTAAGATCAAGTGTAGTATCTGTTCTTATCAGTTTAATATCTGATACG-TCCTCTATCCGAG--GACAATATATTAAATGGATTTTTGGAGCAGGGAGATGGAATAGGAGCTTGCTCTGTCCACTCCACGCATCGACCTGGTATTGCAGTACCTCC</Hsp_qseq>
      <Hsp_hseq>ATCGCTTCTCGGCCTTTTGGCTAAGATCAAGTGTAGTATCTGTTCTTATCAGCTTAATATCTGATACGCTGCTC-AT-CGAGTAGCTCATATATTAAACTGATTTTTGGAACTGGGCTGTGGAAAAGAGGCTTGCCTCGTCCCAGCCACGGGTTGTCTCGGTATTGCACTACCTCC</Hsp_hseq>
      <Hsp_midline>|||||||||||||||||||||||||||||||||||||||||||||||||||| ||||||||||||||| | ||| || ||||  |   ||||||||||  |||||||||| | |||   ||||| ||  ||||||   ||||   |||||  | | |  ||||||||| |||||||</Hsp_midline>
    </Hsp>
    <Hsp>
      <Hsp_num>4</Hsp_num>
      <Hsp_bit-score>156.376</Hsp_bit-score>
      <Hsp_score>172</Hsp_score>
      <Hsp_evalue>4.90495e-36</Hsp_evalue>
      <Hsp_query-from>1</Hsp_query-from>
      <Hsp_query-to>173</Hsp_query-to>
      <Hsp_hit-from>6448</Hsp_hit-from>
      <Hsp_hit-to>6275</Hsp_hit-to>
      <Hsp_query-frame>1</Hsp_query-frame>
      <Hsp_hit-frame>-1</Hsp_hit-frame>
      <Hsp_identity>143</Hsp_identity>
      <Hsp_positive>143</Hsp_positive>
      <Hsp_gaps>5</Hsp_gaps>
      <Hsp_align-len>176</Hsp_align-len>
      <Hsp_qseq>ATCGCTTCTCGGCCTTTTGGCTAAGATCAAGTGTAGTATCTGTTCTTATCAGTTTAATATCTGATACG-TCCTCTATCCGAG--GACAATATATTAAATGGATTTTTGGAGCAGGGAGATGGAATAGGAGCTTGCTCTGTCCACTCCACGCATCGACCTGGTATTGCAGTACCTCC</Hsp_qseq>
      <Hsp_hseq>ATCGCTTCTCGGCCTTTTGGCTAAGATCAAGTGTAGTATCTGTTCTTATCAGCTTAATATCTGATACGCTGCTC-AT-CGAGTAGCTCATATATTAAACTGATTTTTGGAACTGGGCTGTGGAAAAGAGGCTTGCCTCGTCCCAGCCACGGGTTGTCTCGGTATTGCACTACCTCC</Hsp_hseq>
      <Hsp_midline>|||||||||||||||||||||||||||||||||||||||||||||||||||| ||||||||||||||| | ||| || ||||  |   ||||||||||  |||||||||| | |||   ||||| ||  ||||||   ||||   |||||  | | |  ||||||||| |||||||</Hsp_midline>
    </Hsp>
    <Hsp>
      <Hsp_num>5</Hsp_num>
      <Hsp_bit-score>156.376</Hsp_bit-score>
      <Hsp_score>172</Hsp_score>
      <Hsp_evalue>4.90495e-36</Hsp_evalue>
      <Hsp_query-from>1</Hsp_query-from>
      <Hsp_query-to>173</Hsp_query-to>
      <Hsp_hit-from>8032</Hsp_hit-from>
      <Hsp_hit-to>7859</Hsp_hit-to>
      <Hsp_query-frame>1</Hsp_query-frame>
      <Hsp_hit-frame>-1</Hsp_hit-frame>
      <Hsp_identity>143</Hsp_identity>
      <Hsp_positive>143</Hsp_positive>
      <Hsp_gaps>5</Hsp_gaps>
      <Hsp_align-len>176</Hsp_align-len>
      <Hsp_qseq>ATCGCTTCTCGGCCTTTTGGCTAAGATCAAGTGTAGTATCTGTTCTTATCAGTTTAATATCTGATACG-TCCTCTATCCGAG--GACAATATATTAAATGGATTTTTGGAGCAGGGAGATGGAATAGGAGCTTGCTCTGTCCACTCCACGCATCGACCTGGTATTGCAGTACCTCC</Hsp_qseq>
      <Hsp_hseq>ATCGCTTCTCGGCCTTTTGGCTAAGATCAAGTGTAGTATCTGTTCTTATCAGCTTAATATCTGATACGCTGCTC-AT-CGAGTAGCTCATATATTAAACTGATTTTTGGAACTGGGCTGTGGAAAAGAGGCTTGCCTCGTCCCAGCCACGGGTTGTCTCGGTATTGCACTACCTCC</Hsp_hseq>
      <Hsp_midline>|||||||||||||||||||||||||||||||||||||||||||||||||||| ||||||||||||||| | ||| || ||||  |   ||||||||||  |||||||||| | |||   ||||| ||  ||||||   ||||   |||||  | | |  ||||||||| |||||||</Hsp_midline>
    </Hsp>
    <Hsp>
      <Hsp_num>6</Hsp_num>
      <Hsp_bit-score>156.376</Hsp_bit-score>
      <Hsp_score>172</Hsp_score>
      <Hsp_evalue>4.90495e-36</Hsp_evalue>
      <Hsp_query-from>1</Hsp_query-from>
      <Hsp_query-to>173</Hsp_query-to>
      <Hsp_hit-from>9616</Hsp_hit-from>
      <Hsp_hit-to>9443</Hsp_hit-to>
      <Hsp_query-frame>1</Hsp_query-frame>
      <Hsp_hit-frame>-1</Hsp_hit-frame>
      <Hsp_identity>143</Hsp_identity>
      <Hsp_positive>143</Hsp_positive>
      <Hsp_gaps>5</Hsp_gaps>
      <Hsp_align-len>176</Hsp_align-len>
      <Hsp_qseq>ATCGCTTCTCGGCCTTTTGGCTAAGATCAAGTGTAGTATCTGTTCTTATCAGTTTAATATCTGATACG-TCCTCTATCCGAG--GACAATATATTAAATGGATTTTTGGAGCAGGGAGATGGAATAGGAGCTTGCTCTGTCCACTCCACGCATCGACCTGGTATTGCAGTACCTCC</Hsp_qseq>
      <Hsp_hseq>ATCGCTTCTCGGCCTTTTGGCTAAGATCAAGTGTAGTATCTGTTCTTATCAGCTTAATATCTGATACGCTGCTC-AT-CGAGTAGCTCATATATTAAACTGATTTTTGGAACTGGGCTGTGGAAAAGAGGCTTGCCTCGTCCCAGCCACGGGTTGTCTCGGTATTGCACTACCTCC</Hsp_hseq>
      <Hsp_midline>|||||||||||||||||||||||||||||||||||||||||||||||||||| ||||||||||||||| | ||| || ||||  |   ||||||||||  |||||||||| | |||   ||||| ||  ||||||   ||||   |||||  | | |  ||||||||| |||||||</Hsp_midline>
    </Hsp>
  </Hit_hsps>
</Hit>
<Hit>
  <Hit_num>2</Hit_num>
  <Hit_id>gi|1583127893|ref|NW_021126809.1|</Hit_id>
  <Hit_def>Acropora millepora isolate SF001 unplaced genomic scaffold, amil_sf_1.1 amil.Sc0000438</Hit_def>
  <Hit_accession>NW_021126809</Hit_accession>
  <Hit_len>190413</Hit_len>
  <Hit_hsps>
    <Hsp>
      <Hsp_num>1</Hsp_num>
      <Hsp_bit-score>149.163</Hsp_bit-score>
      <Hsp_score>164</Hsp_score>
      <Hsp_evalue>7.27959e-34</Hsp_evalue>
      <Hsp_query-from>1</Hsp_query-from>
      <Hsp_query-to>173</Hsp_query-to>
      <Hsp_hit-from>135528</Hsp_hit-from>
      <Hsp_hit-to>135701</Hsp_hit-to>
      <Hsp_query-frame>1</Hsp_query-frame>
      <Hsp_hit-frame>1</Hsp_hit-frame>
      <Hsp_identity>138</Hsp_identity>
      <Hsp_positive>138</Hsp_positive>
      <Hsp_gaps>1</Hsp_gaps>
      <Hsp_align-len>174</Hsp_align-len>
      <Hsp_qseq>ATCGCTTCTCGGCCTTTTGGCTAAGATCAAGTGTAGTATCTGTTCTTATCAGTTTAATATCTGATACG-TCCTCTATCCGAGGACAATATATTAAATGGATTTTTGGAGCAGGGAGATGGAATAGGAGCTTGCTCTGTCCACTCCACGCATCGACCTGGTATTGCAGTACCTCC</Hsp_qseq>
      <Hsp_hseq>ATCGCTTCTCGGCCTTTTGGCTAAGATCAAGTGTAGTATCTGTTCTTATCAGCTTAATATCTGATACGCTGCTCATTGAGCAGCTCATATATTAAACTGATTTTTGGAACCGGGCTGTGGAAAAGAGGCTTGCCTCGTCCCAGCCACGGGTTGCCTCGGTATAGCACTACCTCC</Hsp_hseq>
      <Hsp_midline>|||||||||||||||||||||||||||||||||||||||||||||||||||| ||||||||||||||| | |||  |  |  |   ||||||||||  |||||||||| | |||   ||||| ||  ||||||   ||||   |||||  | | |  ||||| ||| |||||||</Hsp_midline>
    </Hsp>
    <Hsp>
      <Hsp_num>2</Hsp_num>
      <Hsp_bit-score>149.163</Hsp_bit-score>
      <Hsp_score>164</Hsp_score>
      <Hsp_evalue>7.27959e-34</Hsp_evalue>
      <Hsp_query-from>1</Hsp_query-from>
      <Hsp_query-to>173</Hsp_query-to>
      <Hsp_hit-from>177315</Hsp_hit-from>
      <Hsp_hit-to>177488</Hsp_hit-to>
      <Hsp_query-frame>1</Hsp_query-frame>
      <Hsp_hit-frame>1</Hsp_hit-frame>
      <Hsp_identity>138</Hsp_identity>
      <Hsp_positive>138</Hsp_positive>
      <Hsp_gaps>1</Hsp_gaps>
      <Hsp_align-len>174</Hsp_align-len>
      <Hsp_qseq>ATCGCTTCTCGGCCTTTTGGCTAAGATCAAGTGTAGTATCTGTTCTTATCAGTTTAATATCTGATACG-TCCTCTATCCGAGGACAATATATTAAATGGATTTTTGGAGCAGGGAGATGGAATAGGAGCTTGCTCTGTCCACTCCACGCATCGACCTGGTATTGCAGTACCTCC</Hsp_qseq>
      <Hsp_hseq>ATCGCTTCTCGGCCTTTTGGCTAAGATCAAGTGTAGTATCTGTTCTTATCAGCTTAATATCTGATACGCTGCTCATTGAGCAGCTCATATATTAAACTGATTTTTGGAACCGGGCTGTGGAAAAGAGGCTTGCCTCGTCCCAGCCACGGGTTGCCTCGGTATAGCACTACCTCC</Hsp_hseq>
      <Hsp_midline>|||||||||||||||||||||||||||||||||||||||||||||||||||| ||||||||||||||| | |||  |  |  |   ||||||||||  |||||||||| | |||   ||||| ||  ||||||   ||||   |||||  | | |  ||||| ||| |||||||</Hsp_midline>
    </Hsp>
    <Hsp>
      <Hsp_num>3</Hsp_num>
      <Hsp_bit-score>89.6514</Hsp_bit-score>
      <Hsp_score>98</Hsp_score>
      <Hsp_evalue>5.98073e-16</Hsp_evalue>
      <Hsp_query-from>1</Hsp_query-from>
      <Hsp_query-to>49</Hsp_query-to>
      <Hsp_hit-from>152754</Hsp_hit-from>
      <Hsp_hit-to>152802</Hsp_hit-to>
      <Hsp_query-frame>1</Hsp_query-frame>
      <Hsp_hit-frame>1</Hsp_hit-frame>
      <Hsp_identity>49</Hsp_identity>
      <Hsp_positive>49</Hsp_positive>
      <Hsp_gaps>0</Hsp_gaps>
      <Hsp_align-len>49</Hsp_align-len>
      <Hsp_qseq>ATCGCTTCTCGGCCTTTTGGCTAAGATCAAGTGTAGTATCTGTTCTTAT</Hsp_qseq>
      <Hsp_hseq>ATCGCTTCTCGGCCTTTTGGCTAAGATCAAGTGTAGTATCTGTTCTTAT</Hsp_hseq>
      <Hsp_midline>|||||||||||||||||||||||||||||||||||||||||||||||||</Hsp_midline>
    </Hsp>
    <Hsp>
      <Hsp_num>4</Hsp_num>
      <Hsp_bit-score>82.4379</Hsp_bit-score>
      <Hsp_score>90</Hsp_score>
      <Hsp_evalue>8.87619e-14</Hsp_evalue>
      <Hsp_query-from>38</Hsp_query-from>
      <Hsp_query-to>173</Hsp_query-to>
      <Hsp_hit-from>184948</Hsp_hit-from>
      <Hsp_hit-to>185084</Hsp_hit-to>
      <Hsp_query-frame>1</Hsp_query-frame>
      <Hsp_hit-frame>1</Hsp_hit-frame>
      <Hsp_identity>101</Hsp_identity>
      <Hsp_positive>101</Hsp_positive>
      <Hsp_gaps>1</Hsp_gaps>
      <Hsp_align-len>137</Hsp_align-len>
      <Hsp_qseq>ATCTGTTCTTATCAGTTTAATATCTGATACG-TCCTCTATCCGAGGACAATATATTAAATGGATTTTTGGAGCAGGGAGATGGAATAGGAGCTTGCTCTGTCCACTCCACGCATCGACCTGGTATTGCAGTACCTCC</Hsp_qseq>
      <Hsp_hseq>ATCTGTTCTTATCAGCTTAATATCTGATACGCTGCTCATTGAGCAGCTCATATATTAAACTGATTTTTGGAACCGGGCTGTGGAAAAGAGGCTTGCCTCGTCCCAGCCACGGGTTGCCTCGGTATAGCACTACCTCC</Hsp_hseq>
      <Hsp_midline>||||||||||||||| ||||||||||||||| | |||  |  |  |   ||||||||||  |||||||||| | |||   ||||| ||  ||||||   ||||   |||||  | | |  ||||| ||| |||||||</Hsp_midline>
    </Hsp>
    <Hsp>
      <Hsp_num>5</Hsp_num>
      <Hsp_bit-score>77.9295</Hsp_bit-score>
      <Hsp_score>85</Hsp_score>
      <Hsp_evalue>3.77425e-12</Hsp_evalue>
      <Hsp_query-from>38</Hsp_query-from>
      <Hsp_query-to>188</Hsp_query-to>
      <Hsp_hit-from>2764</Hsp_hit-from>
      <Hsp_hit-to>2915</Hsp_hit-to>
      <Hsp_query-frame>1</Hsp_query-frame>
      <Hsp_hit-frame>1</Hsp_hit-frame>
      <Hsp_identity>109</Hsp_identity>
      <Hsp_positive>109</Hsp_positive>
      <Hsp_gaps>1</Hsp_gaps>
      <Hsp_align-len>152</Hsp_align-len>
      <Hsp_qseq>ATCTGTTCTTATCAGTTTAATATCTGATA-CGTCCTCTATCCGAGGACAATATATTAAATGGATTTTTGGAGCAGGGAGATGGAATAGGAGCTTGCTCTGTCCACTCCACGCATCGACCTGGTATTGCAGTACCTCCAGGACCGGTGCACTT</Hsp_qseq>
      <Hsp_hseq>ATCTGTTCTTATCAGCTTAATATCTGATACCCTGCTCATTGAGCAGCTCATATATTAAACTGATTTTTGGAACCGGGCTGTGGAAAAGAGGCTTGCCTCGTCCCAGCCACGGGTTGCCTCGGTATAGGACTACCTCCAAGCACGGCCCACTT</Hsp_hseq>
      <Hsp_midline>||||||||||||||| ||||||||||||| | | |||  |  |  |   ||||||||||  |||||||||| | |||   ||||| ||  ||||||   ||||   |||||  | | |  ||||| | | |||||||| |  |||  |||||</Hsp_midline>
    </Hsp>
    <Hsp>
      <Hsp_num>6</Hsp_num>
      <Hsp_bit-score>73.4211</Hsp_bit-score>
      <Hsp_score>80</Hsp_score>
      <Hsp_evalue>4.59798e-11</Hsp_evalue>
      <Hsp_query-from>38</Hsp_query-from>
      <Hsp_query-to>173</Hsp_query-to>
      <Hsp_hit-from>11191</Hsp_hit-from>
      <Hsp_hit-to>11327</Hsp_hit-to>
      <Hsp_query-frame>1</Hsp_query-frame>
      <Hsp_hit-frame>1</Hsp_hit-frame>
      <Hsp_identity>99</Hsp_identity>
      <Hsp_positive>99</Hsp_positive>
      <Hsp_gaps>1</Hsp_gaps>
      <Hsp_align-len>137</Hsp_align-len>
      <Hsp_qseq>ATCTGTTCTTATCAGTTTAATATCTGATACG-TCCTCTATCCGAGGACAATATATTAAATGGATTTTTGGAGCAGGGAGATGGAATAGGAGCTTGCTCTGTCCACTCCACGCATCGACCTGGTATTGCAGTACCTCC</Hsp_qseq>
      <Hsp_hseq>ATCTGTTCTTATCAGCTCAATATCTGATATGCTGCTCATTGAGCAGCTCATATATTAAACTGATTTTTGGAACCGGGCTGTGGAAAAGAGGCTTGCCTTGTCCCAGCCACGGGTTGCCTCAGTATAGCACTACCTCC</Hsp_hseq>
      <Hsp_midline>||||||||||||||| | ||||||||||| | | |||  |  |  |   ||||||||||  |||||||||| | |||   ||||| ||  ||||||  |||||   |||||  | | |   |||| ||| |||||||</Hsp_midline>
    </Hsp>
    <Hsp>
      <Hsp_num>7</Hsp_num>
      <Hsp_bit-score>63.5025</Hsp_bit-score>
      <Hsp_score>69</Hsp_score>
      <Hsp_evalue>8.31334e-08</Hsp_evalue>
      <Hsp_query-from>1</Hsp_query-from>
      <Hsp_query-to>37</Hsp_query-to>
      <Hsp_hit-from>116348</Hsp_hit-from>
      <Hsp_hit-to>116384</Hsp_hit-to>
      <Hsp_query-frame>1</Hsp_query-frame>
      <Hsp_hit-frame>1</Hsp_hit-frame>
      <Hsp_identity>36</Hsp_identity>
      <Hsp_positive>36</Hsp_positive>
      <Hsp_gaps>0</Hsp_gaps>
      <Hsp_align-len>37</Hsp_align-len>
      <Hsp_qseq>ATCGCTTCTCGGCCTTTTGGCTAAGATCAAGTGTAGT</Hsp_qseq>
      <Hsp_hseq>ATCGCTTCTCGGCCTTTTGACTAAGATCAAGTGTAGT</Hsp_hseq>
      <Hsp_midline>||||||||||||||||||| |||||||||||||||||</Hsp_midline>
    </Hsp>
    <Hsp>
      <Hsp_num>8</Hsp_num>
      <Hsp_bit-score>58.0924</Hsp_bit-score>
      <Hsp_score>63</Hsp_score>
      <Hsp_evalue>3.53492e-06</Hsp_evalue>
      <Hsp_query-from>38</Hsp_query-from>
      <Hsp_query-to>107</Hsp_query-to>
      <Hsp_hit-from>77199</Hsp_hit-from>
      <Hsp_hit-to>77269</Hsp_hit-to>
      <Hsp_query-frame>1</Hsp_query-frame>
      <Hsp_hit-frame>1</Hsp_hit-frame>
      <Hsp_identity>56</Hsp_identity>
      <Hsp_positive>56</Hsp_positive>
      <Hsp_gaps>1</Hsp_gaps>
      <Hsp_align-len>71</Hsp_align-len>
      <Hsp_qseq>ATCTGTTCTTATCAGTTTAATATCTGATACG-TCCTCTATCCGAGGACAATATATTAAATGGATTTTTGGA</Hsp_qseq>
      <Hsp_hseq>ATCTGTTCTTATCAGCTTAATATCTGATACGCTGCTCATTGAGCAGCTCATACATTAAACTGATTTTTGGA</Hsp_hseq>
      <Hsp_midline>||||||||||||||| ||||||||||||||| | |||  |  |  |   ||| ||||||  ||||||||||</Hsp_midline>
    </Hsp>
    <Hsp>
      <Hsp_num>9</Hsp_num>
      <Hsp_bit-score>53.584</Hsp_bit-score>
      <Hsp_score>58</Hsp_score>
      <Hsp_evalue>4.30642e-05</Hsp_evalue>
      <Hsp_query-from>1</Hsp_query-from>
      <Hsp_query-to>34</Hsp_query-to>
      <Hsp_hit-from>137356</Hsp_hit-from>
      <Hsp_hit-to>137389</Hsp_hit-to>
      <Hsp_query-frame>1</Hsp_query-frame>
      <Hsp_hit-frame>1</Hsp_hit-frame>
      <Hsp_identity>32</Hsp_identity>
      <Hsp_positive>32</Hsp_positive>
      <Hsp_gaps>0</Hsp_gaps>
      <Hsp_align-len>34</Hsp_align-len>
      <Hsp_qseq>ATCGCTTCTCGGCCTTTTGGCTAAGATCAAGTGT</Hsp_qseq>
      <Hsp_hseq>ATCGCTTCTCGGCCTTTTGGCTAAGATCTTGTGT</Hsp_hseq>
      <Hsp_midline>||||||||||||||||||||||||||||  ||||</Hsp_midline>
    </Hsp>
    <Hsp>
      <Hsp_num>10</Hsp_num>
      <Hsp_bit-score>51.7806</Hsp_bit-score>
      <Hsp_score>56</Hsp_score>
      <Hsp_evalue>0.000150309</Hsp_evalue>
      <Hsp_query-from>1</Hsp_query-from>
      <Hsp_query-to>28</Hsp_query-to>
      <Hsp_hit-from>138904</Hsp_hit-from>
      <Hsp_hit-to>138931</Hsp_hit-to>
      <Hsp_query-frame>1</Hsp_query-frame>
      <Hsp_hit-frame>1</Hsp_hit-frame>
      <Hsp_identity>28</Hsp_identity>
      <Hsp_positive>28</Hsp_positive>
      <Hsp_gaps>0</Hsp_gaps>
      <Hsp_align-len>28</Hsp_align-len>
      <Hsp_qseq>ATCGCTTCTCGGCCTTTTGGCTAAGATC</Hsp_qseq>
      <Hsp_hseq>ATCGCTTCTCGGCCTTTTGGCTAAGATC</Hsp_hseq>
      <Hsp_midline>||||||||||||||||||||||||||||</Hsp_midline>
    </Hsp>
    <Hsp>
      <Hsp_num>11</Hsp_num>
      <Hsp_bit-score>47.2722</Hsp_bit-score>
      <Hsp_score>51</Hsp_score>
      <Hsp_evalue>0.00639129</Hsp_evalue>
      <Hsp_query-from>1</Hsp_query-from>
      <Hsp_query-to>28</Hsp_query-to>
      <Hsp_hit-from>87874</Hsp_hit-from>
      <Hsp_hit-to>87901</Hsp_hit-to>
      <Hsp_query-frame>1</Hsp_query-frame>
      <Hsp_hit-frame>1</Hsp_hit-frame>
      <Hsp_identity>27</Hsp_identity>
      <Hsp_positive>27</Hsp_positive>
      <Hsp_gaps>0</Hsp_gaps>
      <Hsp_align-len>28</Hsp_align-len>
      <Hsp_qseq>ATCGCTTCTCGGCCTTTTGGCTAAGATC</Hsp_qseq>
      <Hsp_hseq>ATCGCTTCTCGGCCTTTTGGCTAAGTTC</Hsp_hseq>
      <Hsp_midline>||||||||||||||||||||||||| ||</Hsp_midline>
    </Hsp>
    <Hsp>
      <Hsp_num>12</Hsp_num>
      <Hsp_bit-score>46.3705</Hsp_bit-score>
      <Hsp_score>50</Hsp_score>
      <Hsp_evalue>0.00639129</Hsp_evalue>
      <Hsp_query-from>1</Hsp_query-from>
      <Hsp_query-to>25</Hsp_query-to>
      <Hsp_hit-from>78760</Hsp_hit-from>
      <Hsp_hit-to>78784</Hsp_hit-to>
      <Hsp_query-frame>1</Hsp_query-frame>
      <Hsp_hit-frame>1</Hsp_hit-frame>
      <Hsp_identity>25</Hsp_identity>
      <Hsp_positive>25</Hsp_positive>
      <Hsp_gaps>0</Hsp_gaps>
      <Hsp_align-len>25</Hsp_align-len>
      <Hsp_qseq>ATCGCTTCTCGGCCTTTTGGCTAAG</Hsp_qseq>
      <Hsp_hseq>ATCGCTTCTCGGCCTTTTGGCTAAG</Hsp_hseq>
      <Hsp_midline>|||||||||||||||||||||||||</Hsp_midline>
    </Hsp>
    <Hsp>
      <Hsp_num>13</Hsp_num>
      <Hsp_bit-score>42.7638</Hsp_bit-score>
      <Hsp_score>46</Hsp_score>
      <Hsp_evalue>0.0778619</Hsp_evalue>
      <Hsp_query-from>1</Hsp_query-from>
      <Hsp_query-to>28</Hsp_query-to>
      <Hsp_hit-from>23874</Hsp_hit-from>
      <Hsp_hit-to>23901</Hsp_hit-to>
      <Hsp_query-frame>1</Hsp_query-frame>
      <Hsp_hit-frame>1</Hsp_hit-frame>
      <Hsp_identity>26</Hsp_identity>
      <Hsp_positive>26</Hsp_positive>
      <Hsp_gaps>0</Hsp_gaps>
      <Hsp_align-len>28</Hsp_align-len>
      <Hsp_qseq>ATCGCTTCTCGGCCTTTTGGCTAAGATC</Hsp_qseq>
      <Hsp_hseq>ATCGCTTCTCGGCCTTTTGGCAAAGCTC</Hsp_hseq>
      <Hsp_midline>||||||||||||||||||||| ||| ||</Hsp_midline>
    </Hsp>
    <Hsp>
      <Hsp_num>14</Hsp_num>
      <Hsp_bit-score>37.3537</Hsp_bit-score>
      <Hsp_score>40</Hsp_score>
      <Hsp_evalue>3.31077</Hsp_evalue>
      <Hsp_query-from>1</Hsp_query-from>
      <Hsp_query-to>25</Hsp_query-to>
      <Hsp_hit-from>55486</Hsp_hit-from>
      <Hsp_hit-to>55510</Hsp_hit-to>
      <Hsp_query-frame>1</Hsp_query-frame>
      <Hsp_hit-frame>1</Hsp_hit-frame>
      <Hsp_identity>23</Hsp_identity>
      <Hsp_positive>23</Hsp_positive>
      <Hsp_gaps>0</Hsp_gaps>
      <Hsp_align-len>25</Hsp_align-len>
      <Hsp_qseq>ATCGCTTCTCGGCCTTTTGGCTAAG</Hsp_qseq>
      <Hsp_hseq>ATTGCTTCTCGGCCTTTTCGCTAAG</Hsp_hseq>
      <Hsp_midline>|| ||||||||||||||| ||||||</Hsp_midline>
    </Hsp>
  </Hit_hsps>
</Hit>
<Hit>
  <Hit_num>3</Hit_num>
  <Hit_id>gi|1583126852|ref|NW_021126939.1|</Hit_id>
  <Hit_def>Acropora millepora isolate SF001 unplaced genomic scaffold, amil_sf_1.1 amil.Sc0000568</Hit_def>
  <Hit_accession>NW_021126939</Hit_accession>
  <Hit_len>107169</Hit_len>
  <Hit_hsps>
    <Hsp>
      <Hsp_num>1</Hsp_num>
      <Hsp_bit-score>149.163</Hsp_bit-score>
      <Hsp_score>164</Hsp_score>
      <Hsp_evalue>7.27959e-34</Hsp_evalue>
      <Hsp_query-from>1</Hsp_query-from>
      <Hsp_query-to>173</Hsp_query-to>
      <Hsp_hit-from>60715</Hsp_hit-from>
      <Hsp_hit-to>60888</Hsp_hit-to>
      <Hsp_query-frame>1</Hsp_query-frame>
      <Hsp_hit-frame>1</Hsp_hit-frame>
      <Hsp_identity>138</Hsp_identity>
      <Hsp_positive>138</Hsp_positive>
      <Hsp_gaps>1</Hsp_gaps>
      <Hsp_align-len>174</Hsp_align-len>
      <Hsp_qseq>ATCGCTTCTCGGCCTTTTGGCTAAGATCAAGTGTAGTATCTGTTCTTATCAGTTTAATATCTGATACG-TCCTCTATCCGAGGACAATATATTAAATGGATTTTTGGAGCAGGGAGATGGAATAGGAGCTTGCTCTGTCCACTCCACGCATCGACCTGGTATTGCAGTACCTCC</Hsp_qseq>
      <Hsp_hseq>ATCGCTTCTCGGCCTTTTGGCTAAGATCAAGTGTAGTATCTGTTCTTATCAGCTTAATATCTGATACGCTGCTCATTGAGCAGCTCATATATTAAACTGATTTTTGGAACCGGGCTGTGGAAAAGAGGCTTGCCTCGTCCCAGCCACGGGTTGCCTCGGTATAGCACTACCTCC</Hsp_hseq>
      <Hsp_midline>|||||||||||||||||||||||||||||||||||||||||||||||||||| ||||||||||||||| | |||  |  |  |   ||||||||||  |||||||||| | |||   ||||| ||  ||||||   ||||   |||||  | | |  ||||| ||| |||||||</Hsp_midline>
    </Hsp>
    <Hsp>
      <Hsp_num>2</Hsp_num>
      <Hsp_bit-score>149.163</Hsp_bit-score>
      <Hsp_score>164</Hsp_score>
      <Hsp_evalue>7.27959e-34</Hsp_evalue>
      <Hsp_query-from>1</Hsp_query-from>
      <Hsp_query-to>173</Hsp_query-to>
      <Hsp_hit-from>85697</Hsp_hit-from>
      <Hsp_hit-to>85870</Hsp_hit-to>
      <Hsp_query-frame>1</Hsp_query-frame>
      <Hsp_hit-frame>1</Hsp_hit-frame>
      <Hsp_identity>138</Hsp_identity>
      <Hsp_positive>138</Hsp_positive>
      <Hsp_gaps>1</Hsp_gaps>
      <Hsp_align-len>174</Hsp_align-len>
      <Hsp_qseq>ATCGCTTCTCGGCCTTTTGGCTAAGATCAAGTGTAGTATCTGTTCTTATCAGTTTAATATCTGATACG-TCCTCTATCCGAGGACAATATATTAAATGGATTTTTGGAGCAGGGAGATGGAATAGGAGCTTGCTCTGTCCACTCCACGCATCGACCTGGTATTGCAGTACCTCC</Hsp_qseq>
      <Hsp_hseq>ATCGCTTCTCGGCCTTTTGGCTAAGATCAAGTGTAGTATCTGTTCTTATCAGCTTAATATCTGATACGCTGCTCATTGAGCAGCTCATATATTAAACTGATTTTTGGAACCGGGCTGTGGAAAAGAGGCTTGCCTCGTCCCAGCCACGGGTTGCCTCGGTATAGCACTACCTCC</Hsp_hseq>
      <Hsp_midline>|||||||||||||||||||||||||||||||||||||||||||||||||||| ||||||||||||||| | |||  |  |  |   ||||||||||  |||||||||| | |||   ||||| ||  ||||||   ||||   |||||  | | |  ||||| ||| |||||||</Hsp_midline>
    </Hsp>
    <Hsp>
      <Hsp_num>3</Hsp_num>
      <Hsp_bit-score>110.39</Hsp_bit-score>
      <Hsp_score>121</Hsp_score>
      <Hsp_evalue>6.38565e-22</Hsp_evalue>
      <Hsp_query-from>4</Hsp_query-from>
      <Hsp_query-to>107</Hsp_query-to>
      <Hsp_hit-from>99250</Hsp_hit-from>
      <Hsp_hit-to>99354</Hsp_hit-to>
      <Hsp_query-frame>1</Hsp_query-frame>
      <Hsp_hit-frame>1</Hsp_hit-frame>
      <Hsp_identity>88</Hsp_identity>
      <Hsp_positive>88</Hsp_positive>
      <Hsp_gaps>1</Hsp_gaps>
      <Hsp_align-len>105</Hsp_align-len>
      <Hsp_qseq>GCTTCTCGGCCTTTTGGCTAAGATCAAGTGTAGTATCTGTTCTTATCAGTTTAATATCTGATACG-TCCTCTATCCGAGGACAATATATTAAATGGATTTTTGGA</Hsp_qseq>
      <Hsp_hseq>GCTTCTCGGTTTTTTGGCTAAGATCAAGTGTAGTGTCTGTTCTTATCAGCTTAATATCTGATACGCTGCTCATTGAGCAGCTCATATATTAAACTGATTTTTGGA</Hsp_hseq>
      <Hsp_midline>|||||||||  ||||||||||||||||||||||| |||||||||||||| ||||||||||||||| | |||  |  |  |   ||||||||||  ||||||||||</Hsp_midline>
    </Hsp>
    <Hsp>
      <Hsp_num>4</Hsp_num>
      <Hsp_bit-score>82.4379</Hsp_bit-score>
      <Hsp_score>90</Hsp_score>
      <Hsp_evalue>8.87619e-14</Hsp_evalue>
      <Hsp_query-from>38</Hsp_query-from>
      <Hsp_query-to>173</Hsp_query-to>
      <Hsp_hit-from>30391</Hsp_hit-from>
      <Hsp_hit-to>30255</Hsp_hit-to>
      <Hsp_query-frame>1</Hsp_query-frame>
      <Hsp_hit-frame>-1</Hsp_hit-frame>
      <Hsp_identity>101</Hsp_identity>
      <Hsp_positive>101</Hsp_positive>
      <Hsp_gaps>1</Hsp_gaps>
      <Hsp_align-len>137</Hsp_align-len>
      <Hsp_qseq>ATCTGTTCTTATCAGTTTAATATCTGATACG-TCCTCTATCCGAGGACAATATATTAAATGGATTTTTGGAGCAGGGAGATGGAATAGGAGCTTGCTCTGTCCACTCCACGCATCGACCTGGTATTGCAGTACCTCC</Hsp_qseq>
      <Hsp_hseq>ATCTGTTCTTATCAGCTTAATATCTGATACGCTGCTCATTGAGCAGCTCATATATTAAACTGATTTTTGGAACCGGGCTGTGGAAAAGAGGCTTGCCTCGTCCCAGCCACGGGTTGCCTCGGTATAGCACTACCTCC</Hsp_hseq>
      <Hsp_midline>||||||||||||||| ||||||||||||||| | |||  |  |  |   ||||||||||  |||||||||| | |||   ||||| ||  ||||||   ||||   |||||  | | |  ||||| ||| |||||||</Hsp_midline>
    </Hsp>
    <Hsp>
      <Hsp_num>5</Hsp_num>
      <Hsp_bit-score>68.0109</Hsp_bit-score>
      <Hsp_score>74</Hsp_score>
      <Hsp_evalue>1.95511e-09</Hsp_evalue>
      <Hsp_query-from>38</Hsp_query-from>
      <Hsp_query-to>180</Hsp_query-to>
      <Hsp_hit-from>62213</Hsp_hit-from>
      <Hsp_hit-to>62355</Hsp_hit-to>
      <Hsp_query-frame>1</Hsp_query-frame>
      <Hsp_hit-frame>1</Hsp_hit-frame>
      <Hsp_identity>104</Hsp_identity>
      <Hsp_positive>104</Hsp_positive>
      <Hsp_gaps>4</Hsp_gaps>
      <Hsp_align-len>145</Hsp_align-len>
      <Hsp_qseq>ATCTGTTCTTATCAGTTTAATATCTGATACG-TCCTCTATCCGAGGACAATATATTAAATGGATTTTTGGAGCAGGGAGATGG-AATAGGAGCTTGCTCTGTCCACTCCACGCATCGACCTGGTATTGCAGTACCTCCAGGACCG</Hsp_qseq>
      <Hsp_hseq>ATCTGTTCGTATCAGCTTAATATCTGATTCGCTGCTCATTGAGCAGCTCATATATTAAACTGATTTTTGGAACCGGGCTGTGGCAAAAGAGGCTTGCCTCGTCCCAGCCACGGGTTGCCTCGGTATAGCACTACCTCC--GACCG</Hsp_hseq>
      <Hsp_midline>|||||||| |||||| |||||||||||| || | |||  |  |  |   ||||||||||  |||||||||| | |||   ||| || ||  ||||||   ||||   |||||  | | |  ||||| ||| |||||||  |||||</Hsp_midline>
    </Hsp>
    <Hsp>
      <Hsp_num>6</Hsp_num>
      <Hsp_bit-score>62.6008</Hsp_bit-score>
      <Hsp_score>68</Hsp_score>
      <Hsp_evalue>8.31334e-08</Hsp_evalue>
      <Hsp_query-from>1</Hsp_query-from>
      <Hsp_query-to>34</Hsp_query-to>
      <Hsp_hit-from>34780</Hsp_hit-from>
      <Hsp_hit-to>34747</Hsp_hit-to>
      <Hsp_query-frame>1</Hsp_query-frame>
      <Hsp_hit-frame>-1</Hsp_hit-frame>
      <Hsp_identity>34</Hsp_identity>
      <Hsp_positive>34</Hsp_positive>
      <Hsp_gaps>0</Hsp_gaps>
      <Hsp_align-len>34</Hsp_align-len>
      <Hsp_qseq>ATCGCTTCTCGGCCTTTTGGCTAAGATCAAGTGT</Hsp_qseq>
      <Hsp_hseq>ATCGCTTCTCGGCCTTTTGGCTAAGATCAAGTGT</Hsp_hseq>
      <Hsp_midline>||||||||||||||||||||||||||||||||||</Hsp_midline>
    </Hsp>
    <Hsp>
      <Hsp_num>7</Hsp_num>
      <Hsp_bit-score>41.8621</Hsp_bit-score>
      <Hsp_score>45</Hsp_score>
      <Hsp_evalue>0.271765</Hsp_evalue>
      <Hsp_query-from>1</Hsp_query-from>
      <Hsp_query-to>25</Hsp_query-to>
      <Hsp_hit-from>20354</Hsp_hit-from>
      <Hsp_hit-to>20330</Hsp_hit-to>
      <Hsp_query-frame>1</Hsp_query-frame>
      <Hsp_hit-frame>-1</Hsp_hit-frame>
      <Hsp_identity>24</Hsp_identity>
      <Hsp_positive>24</Hsp_positive>
      <Hsp_gaps>0</Hsp_gaps>
      <Hsp_align-len>25</Hsp_align-len>
      <Hsp_qseq>ATCGCTTCTCGGCCTTTTGGCTAAG</Hsp_qseq>
      <Hsp_hseq>ATCGCTTCTCAGCCTTTTGGCTAAG</Hsp_hseq>
      <Hsp_midline>|||||||||| ||||||||||||||</Hsp_midline>
    </Hsp>
    <Hsp>
      <Hsp_num>8</Hsp_num>
      <Hsp_bit-score>38.2554</Hsp_bit-score>
      <Hsp_score>41</Hsp_score>
      <Hsp_evalue>3.31077</Hsp_evalue>
      <Hsp_query-from>1</Hsp_query-from>
      <Hsp_query-to>28</Hsp_query-to>
      <Hsp_hit-from>10316</Hsp_hit-from>
      <Hsp_hit-to>10289</Hsp_hit-to>
      <Hsp_query-frame>1</Hsp_query-frame>
      <Hsp_hit-frame>-1</Hsp_hit-frame>
      <Hsp_identity>25</Hsp_identity>
      <Hsp_positive>25</Hsp_positive>
      <Hsp_gaps>0</Hsp_gaps>
      <Hsp_align-len>28</Hsp_align-len>
      <Hsp_qseq>ATCGCTTCTCGGCCTTTTGGCTAAGATC</Hsp_qseq>
      <Hsp_hseq>ATCGCTTCTCGGCCTTTTGAGTAAGGTC</Hsp_hseq>
      <Hsp_midline>|||||||||||||||||||  |||| ||</Hsp_midline>
    </Hsp>
  </Hit_hsps>
</Hit>
<Hit>
  <Hit_num>4</Hit_num>
  <Hit_id>gi|1583123191|ref|NW_021127469.1|</Hit_id>
  <Hit_def>Acropora millepora isolate SF001 unplaced genomic scaffold, amil_sf_1.1 amil.xfSc0000099</Hit_def>
  <Hit_accession>NW_021127469</Hit_accession>
  <Hit_len>176347</Hit_len>
  <Hit_hsps>
    <Hsp>
      <Hsp_num>1</Hsp_num>
      <Hsp_bit-score>149.163</Hsp_bit-score>
      <Hsp_score>164</Hsp_score>
      <Hsp_evalue>7.27959e-34</Hsp_evalue>
      <Hsp_query-from>1</Hsp_query-from>
      <Hsp_query-to>173</Hsp_query-to>
      <Hsp_hit-from>171994</Hsp_hit-from>
      <Hsp_hit-to>171821</Hsp_hit-to>
      <Hsp_query-frame>1</Hsp_query-frame>
      <Hsp_hit-frame>-1</Hsp_hit-frame>
      <Hsp_identity>138</Hsp_identity>
      <Hsp_positive>138</Hsp_positive>
      <Hsp_gaps>1</Hsp_gaps>
      <Hsp_align-len>174</Hsp_align-len>
      <Hsp_qseq>ATCGCTTCTCGGCCTTTTGGCTAAGATCAAGTGTAGTATCTGTTCTTATCAGTTTAATATCTGATACG-TCCTCTATCCGAGGACAATATATTAAATGGATTTTTGGAGCAGGGAGATGGAATAGGAGCTTGCTCTGTCCACTCCACGCATCGACCTGGTATTGCAGTACCTCC</Hsp_qseq>
      <Hsp_hseq>ATCGCTTCTCGGCCTTTTGGCTAAGATCAAGTGTAGTATCTGTTCTTATCAGCTTAATATCTGATACGCTGCTCATTGAGCAGCTCATATATTAAACTGATTTTTGGAACCGGGCTGTGGAAAAGAGGCTTGCCTCGTCCCAGCCACGGGTTGCCTCGGTATAGCACTACCTCC</Hsp_hseq>
      <Hsp_midline>|||||||||||||||||||||||||||||||||||||||||||||||||||| ||||||||||||||| | |||  |  |  |   ||||||||||  |||||||||| | |||   ||||| ||  ||||||   ||||   |||||  | | |  ||||| ||| |||||||</Hsp_midline>
    </Hsp>
    <Hsp>
      <Hsp_num>2</Hsp_num>
      <Hsp_bit-score>56.2891</Hsp_bit-score>
      <Hsp_score>61</Hsp_score>
      <Hsp_evalue>1.23381e-05</Hsp_evalue>
      <Hsp_query-from>38</Hsp_query-from>
      <Hsp_query-to>173</Hsp_query-to>
      <Hsp_hit-from>878</Hsp_hit-from>
      <Hsp_hit-to>742</Hsp_hit-to>
      <Hsp_query-frame>1</Hsp_query-frame>
      <Hsp_hit-frame>-1</Hsp_hit-frame>
      <Hsp_identity>99</Hsp_identity>
      <Hsp_positive>99</Hsp_positive>
      <Hsp_gaps>9</Hsp_gaps>
      <Hsp_align-len>141</Hsp_align-len>
      <Hsp_qseq>ATCTGTTCTTATCAGTTTAATATCTGATACG-TCCTCTATCCGAGGACA----ATATATTAAATGGATTTTTGGAGCAGGGAGATGGAATAGGAGCTTGCTCTGTCCACTCCACGCATCGACCTGGTATTGCAGTACCTCC</Hsp_qseq>
      <Hsp_hseq>ATCTGTTCTTATAAGCTTAATATCTGATACGCTGCTC-AT---TGAACAGCTCATATATTAAACTAATTTTTGGAACTAGGCTGTGGAAAAGAGGCTTGCCTCGTCCCAGCCACTGGTTGCCTCGGTACAGCACTACCTCC</Hsp_hseq>
      <Hsp_midline>|||||||||||| || ||||||||||||||| | ||| ||    | |||    ||||||||||   ||||||||| |  ||   ||||| ||  ||||||   ||||   ||||   | | |  ||||  ||| |||||||</Hsp_midline>
    </Hsp>
    <Hsp>
      <Hsp_num>3</Hsp_num>
      <Hsp_bit-score>47.2722</Hsp_bit-score>
      <Hsp_score>51</Hsp_score>
      <Hsp_evalue>0.00639129</Hsp_evalue>
      <Hsp_query-from>48</Hsp_query-from>
      <Hsp_query-to>173</Hsp_query-to>
      <Hsp_hit-from>49378</Hsp_hit-from>
      <Hsp_hit-to>49498</Hsp_hit-to>
      <Hsp_query-frame>1</Hsp_query-frame>
      <Hsp_hit-frame>1</Hsp_hit-frame>
      <Hsp_identity>87</Hsp_identity>
      <Hsp_positive>87</Hsp_positive>
      <Hsp_gaps>7</Hsp_gaps>
      <Hsp_align-len>127</Hsp_align-len>
      <Hsp_qseq>ATCAGTTTAATATCTGATAC-GTCCTCTATCCGAGGACAATATATTAAATGGATTTTTGGAGCAGGGAGATGGAATAGGAGCTTGCTCTGTCCACTCCACGCATCGACCTGGTATTGCAGTACCTCC</Hsp_qseq>
      <Hsp_hseq>ATCAGCTTAATATCTGATACGGTGCTCATTGAGCAGCTCATGTATTAAACTGATTTTTGGAACCG------GGAAAAGAGGCTTGCCTCGTCCCAGCCATGGGTTGCCTTGGTATAGCACTACCTCC</Hsp_hseq>
      <Hsp_midline>||||| |||||||||||||| || |||  |  |  |   || |||||||  |||||||||| | |      |||| ||  ||||||   ||||   ||| |  | | | |||||| ||| |||||||</Hsp_midline>
    </Hsp>
    <Hsp>
      <Hsp_num>4</Hsp_num>
      <Hsp_bit-score>46.3705</Hsp_bit-score>
      <Hsp_score>50</Hsp_score>
      <Hsp_evalue>0.00639129</Hsp_evalue>
      <Hsp_query-from>1</Hsp_query-from>
      <Hsp_query-to>25</Hsp_query-to>
      <Hsp_hit-from>163136</Hsp_hit-from>
      <Hsp_hit-to>163112</Hsp_hit-to>
      <Hsp_query-frame>1</Hsp_query-frame>
      <Hsp_hit-frame>-1</Hsp_hit-frame>
      <Hsp_identity>25</Hsp_identity>
      <Hsp_positive>25</Hsp_positive>
      <Hsp_gaps>0</Hsp_gaps>
      <Hsp_align-len>25</Hsp_align-len>
      <Hsp_qseq>ATCGCTTCTCGGCCTTTTGGCTAAG</Hsp_qseq>
      <Hsp_hseq>ATCGCTTCTCGGCCTTTTGGCTAAG</Hsp_hseq>
      <Hsp_midline>|||||||||||||||||||||||||</Hsp_midline>
    </Hsp>
    <Hsp>
      <Hsp_num>5</Hsp_num>
      <Hsp_bit-score>46.3705</Hsp_bit-score>
      <Hsp_score>50</Hsp_score>
      <Hsp_evalue>0.00639129</Hsp_evalue>
      <Hsp_query-from>1</Hsp_query-from>
      <Hsp_query-to>25</Hsp_query-to>
      <Hsp_hit-from>166663</Hsp_hit-from>
      <Hsp_hit-to>166639</Hsp_hit-to>
      <Hsp_query-frame>1</Hsp_query-frame>
      <Hsp_hit-frame>-1</Hsp_hit-frame>
      <Hsp_identity>25</Hsp_identity>
      <Hsp_positive>25</Hsp_positive>
      <Hsp_gaps>0</Hsp_gaps>
      <Hsp_align-len>25</Hsp_align-len>
      <Hsp_qseq>ATCGCTTCTCGGCCTTTTGGCTAAG</Hsp_qseq>
      <Hsp_hseq>ATCGCTTCTCGGCCTTTTGGCTAAG</Hsp_hseq>
      <Hsp_midline>|||||||||||||||||||||||||</Hsp_midline>
    </Hsp>
    <Hsp>
      <Hsp_num>6</Hsp_num>
      <Hsp_bit-score>45.4688</Hsp_bit-score>
      <Hsp_score>49</Hsp_score>
      <Hsp_evalue>0.0223078</Hsp_evalue>
      <Hsp_query-from>1</Hsp_query-from>
      <Hsp_query-to>27</Hsp_query-to>
      <Hsp_hit-from>155523</Hsp_hit-from>
      <Hsp_hit-to>155497</Hsp_hit-to>
      <Hsp_query-frame>1</Hsp_query-frame>
      <Hsp_hit-frame>-1</Hsp_hit-frame>
      <Hsp_identity>26</Hsp_identity>
      <Hsp_positive>26</Hsp_positive>
      <Hsp_gaps>0</Hsp_gaps>
      <Hsp_align-len>27</Hsp_align-len>
      <Hsp_qseq>ATCGCTTCTCGGCCTTTTGGCTAAGAT</Hsp_qseq>
      <Hsp_hseq>ATCGCTTCTCGGCCTTTTGGCCAAGAT</Hsp_hseq>
      <Hsp_midline>||||||||||||||||||||| |||||</Hsp_midline>
    </Hsp>
    <Hsp>
      <Hsp_num>7</Hsp_num>
      <Hsp_bit-score>41.8621</Hsp_bit-score>
      <Hsp_score>45</Hsp_score>
      <Hsp_evalue>0.271765</Hsp_evalue>
      <Hsp_query-from>1</Hsp_query-from>
      <Hsp_query-to>25</Hsp_query-to>
      <Hsp_hit-from>107638</Hsp_hit-from>
      <Hsp_hit-to>107614</Hsp_hit-to>
      <Hsp_query-frame>1</Hsp_query-frame>
      <Hsp_hit-frame>-1</Hsp_hit-frame>
      <Hsp_identity>24</Hsp_identity>
      <Hsp_positive>24</Hsp_positive>
      <Hsp_gaps>0</Hsp_gaps>
      <Hsp_align-len>25</Hsp_align-len>
      <Hsp_qseq>ATCGCTTCTCGGCCTTTTGGCTAAG</Hsp_qseq>
      <Hsp_hseq>ATAGCTTCTCGGCCTTTTGGCTAAG</Hsp_hseq>
      <Hsp_midline>|| ||||||||||||||||||||||</Hsp_midline>
    </Hsp>
    <Hsp>
      <Hsp_num>8</Hsp_num>
      <Hsp_bit-score>40.9604</Hsp_bit-score>
      <Hsp_score>44</Hsp_score>
      <Hsp_evalue>0.271765</Hsp_evalue>
      <Hsp_query-from>1</Hsp_query-from>
      <Hsp_query-to>27</Hsp_query-to>
      <Hsp_hit-from>58908</Hsp_hit-from>
      <Hsp_hit-to>58882</Hsp_hit-to>
      <Hsp_query-frame>1</Hsp_query-frame>
      <Hsp_hit-frame>-1</Hsp_hit-frame>
      <Hsp_identity>25</Hsp_identity>
      <Hsp_positive>25</Hsp_positive>
      <Hsp_gaps>0</Hsp_gaps>
      <Hsp_align-len>27</Hsp_align-len>
      <Hsp_qseq>ATCGCTTCTCGGCCTTTTGGCTAAGAT</Hsp_qseq>
      <Hsp_hseq>ATCGCTTCTAGGCCTTTTGGCCAAGAT</Hsp_hseq>
      <Hsp_midline>||||||||| ||||||||||| |||||</Hsp_midline>
    </Hsp>
    <Hsp>
      <Hsp_num>9</Hsp_num>
      <Hsp_bit-score>39.157</Hsp_bit-score>
      <Hsp_score>42</Hsp_score>
      <Hsp_evalue>0.948552</Hsp_evalue>
      <Hsp_query-from>11</Hsp_query-from>
      <Hsp_query-to>37</Hsp_query-to>
      <Hsp_hit-from>264</Hsp_hit-from>
      <Hsp_hit-to>237</Hsp_hit-to>
      <Hsp_query-frame>1</Hsp_query-frame>
      <Hsp_hit-frame>-1</Hsp_hit-frame>
      <Hsp_identity>26</Hsp_identity>
      <Hsp_positive>26</Hsp_positive>
      <Hsp_gaps>1</Hsp_gaps>
      <Hsp_align-len>28</Hsp_align-len>
      <Hsp_qseq>GGCC-TTTTGGCTAAGATCAAGTGTAGT</Hsp_qseq>
      <Hsp_hseq>GGCCATTTTGGCCAAGATCAAGTGTAGT</Hsp_hseq>
      <Hsp_midline>|||| ||||||| |||||||||||||||</Hsp_midline>
    </Hsp>
    <Hsp>
      <Hsp_num>10</Hsp_num>
      <Hsp_bit-score>38.2554</Hsp_bit-score>
      <Hsp_score>41</Hsp_score>
      <Hsp_evalue>3.31077</Hsp_evalue>
      <Hsp_query-from>1</Hsp_query-from>
      <Hsp_query-to>28</Hsp_query-to>
      <Hsp_hit-from>33812</Hsp_hit-from>
      <Hsp_hit-to>33785</Hsp_hit-to>
      <Hsp_query-frame>1</Hsp_query-frame>
      <Hsp_hit-frame>-1</Hsp_hit-frame>
      <Hsp_identity>25</Hsp_identity>
      <Hsp_positive>25</Hsp_positive>
      <Hsp_gaps>0</Hsp_gaps>
      <Hsp_align-len>28</Hsp_align-len>
      <Hsp_qseq>ATCGCTTCTCGGCCTTTTGGCTAAGATC</Hsp_qseq>
      <Hsp_hseq>ATCACTTCGCGGCCTTTTGGCTTAGATC</Hsp_hseq>
      <Hsp_midline>||| |||| ||||||||||||| |||||</Hsp_midline>
    </Hsp>
    <Hsp>
      <Hsp_num>11</Hsp_num>
      <Hsp_bit-score>37.3537</Hsp_bit-score>
      <Hsp_score>40</Hsp_score>
      <Hsp_evalue>3.31077</Hsp_evalue>
      <Hsp_query-from>1</Hsp_query-from>
      <Hsp_query-to>25</Hsp_query-to>
      <Hsp_hit-from>40840</Hsp_hit-from>
      <Hsp_hit-to>40816</Hsp_hit-to>
      <Hsp_query-frame>1</Hsp_query-frame>
      <Hsp_hit-frame>-1</Hsp_hit-frame>
      <Hsp_identity>23</Hsp_identity>
      <Hsp_positive>23</Hsp_positive>
      <Hsp_gaps>0</Hsp_gaps>
      <Hsp_align-len>25</Hsp_align-len>
      <Hsp_qseq>ATCGCTTCTCGGCCTTTTGGCTAAG</Hsp_qseq>
      <Hsp_hseq>ATCGCTTCTCGTCCTTTTGACTAAG</Hsp_hseq>
      <Hsp_midline>||||||||||| ||||||| |||||</Hsp_midline>
    </Hsp>
  </Hit_hsps>
</Hit>
<Hit>
  <Hit_num>5</Hit_num>
  <Hit_id>gi|1583122830|ref|NW_021127557.1|</Hit_id>
  <Hit_def>Acropora millepora isolate SF001 unplaced genomic scaffold, amil_sf_1.1 amil.xfSc0000187</Hit_def>
  <Hit_accession>NW_021127557</Hit_accession>
  <Hit_len>90679</Hit_len>
  <Hit_hsps>
    <Hsp>
      <Hsp_num>1</Hsp_num>
      <Hsp_bit-score>149.163</Hsp_bit-score>
      <Hsp_score>164</Hsp_score>
      <Hsp_evalue>7.27959e-34</Hsp_evalue>
      <Hsp_query-from>1</Hsp_query-from>
      <Hsp_query-to>173</Hsp_query-to>
      <Hsp_hit-from>39388</Hsp_hit-from>
      <Hsp_hit-to>39215</Hsp_hit-to>
      <Hsp_query-frame>1</Hsp_query-frame>
      <Hsp_hit-frame>-1</Hsp_hit-frame>
      <Hsp_identity>138</Hsp_identity>
      <Hsp_positive>138</Hsp_positive>
      <Hsp_gaps>1</Hsp_gaps>
      <Hsp_align-len>174</Hsp_align-len>
      <Hsp_qseq>ATCGCTTCTCGGCCTTTTGGCTAAGATCAAGTGTAGTATCTGTTCTTATCAGTTTAATATCTGATACG-TCCTCTATCCGAGGACAATATATTAAATGGATTTTTGGAGCAGGGAGATGGAATAGGAGCTTGCTCTGTCCACTCCACGCATCGACCTGGTATTGCAGTACCTCC</Hsp_qseq>
      <Hsp_hseq>ATCGCTTCTCGGCCTTTTGGCTAAGATCAAGTGTAGTATCTGTTCTTATCAGCTTAATATCTGATACGCTGCTCATTGAGCAGCTCATATATTAAACTGATTTTTGGAACCGGGCTGTGGAAAAGAGGCTTGCCTCGTCCCAGCCACGGGTTGCCTCGGTATAGCACTACCTCC</Hsp_hseq>
      <Hsp_midline>|||||||||||||||||||||||||||||||||||||||||||||||||||| ||||||||||||||| | |||  |  |  |   ||||||||||  |||||||||| | |||   ||||| ||  ||||||   ||||   |||||  | | |  ||||| ||| |||||||</Hsp_midline>
    </Hsp>
    <Hsp>
      <Hsp_num>2</Hsp_num>
      <Hsp_bit-score>149.163</Hsp_bit-score>
      <Hsp_score>164</Hsp_score>
      <Hsp_evalue>7.27959e-34</Hsp_evalue>
      <Hsp_query-from>1</Hsp_query-from>
      <Hsp_query-to>173</Hsp_query-to>
      <Hsp_hit-from>48137</Hsp_hit-from>
      <Hsp_hit-to>47964</Hsp_hit-to>
      <Hsp_query-frame>1</Hsp_query-frame>
      <Hsp_hit-frame>-1</Hsp_hit-frame>
      <Hsp_identity>138</Hsp_identity>
      <Hsp_positive>138</Hsp_positive>
      <Hsp_gaps>1</Hsp_gaps>
      <Hsp_align-len>174</Hsp_align-len>
      <Hsp_qseq>ATCGCTTCTCGGCCTTTTGGCTAAGATCAAGTGTAGTATCTGTTCTTATCAGTTTAATATCTGATACG-TCCTCTATCCGAGGACAATATATTAAATGGATTTTTGGAGCAGGGAGATGGAATAGGAGCTTGCTCTGTCCACTCCACGCATCGACCTGGTATTGCAGTACCTCC</Hsp_qseq>
      <Hsp_hseq>ATCGCTTCTCGGCCTTTTGGCTAAGATCAAGTGTAGTATCTGTTCTTATCAGCTTAATATCTGATACGCTGCTCATTGAGCAGCTCATATATTAAACTGATTTTTGGAACCGGGCTGTGGAAAAGAGGCTTGCCTCGTCCCAGCCACGGGTTGCCTCGGTATAGCACTACCTCC</Hsp_hseq>
      <Hsp_midline>|||||||||||||||||||||||||||||||||||||||||||||||||||| ||||||||||||||| | |||  |  |  |   ||||||||||  |||||||||| | |||   ||||| ||  ||||||   ||||   |||||  | | |  ||||| ||| |||||||</Hsp_midline>
    </Hsp>
    <Hsp>
      <Hsp_num>3</Hsp_num>
      <Hsp_bit-score>62.6008</Hsp_bit-score>
      <Hsp_score>68</Hsp_score>
      <Hsp_evalue>8.31334e-08</Hsp_evalue>
      <Hsp_query-from>38</Hsp_query-from>
      <Hsp_query-to>173</Hsp_query-to>
      <Hsp_hit-from>3227</Hsp_hit-from>
      <Hsp_hit-to>3090</Hsp_hit-to>
      <Hsp_query-frame>1</Hsp_query-frame>
      <Hsp_hit-frame>-1</Hsp_hit-frame>
      <Hsp_identity>98</Hsp_identity>
      <Hsp_positive>98</Hsp_positive>
      <Hsp_gaps>2</Hsp_gaps>
      <Hsp_align-len>138</Hsp_align-len>
      <Hsp_qseq>ATCTGTTCTTATCAGTTTAATATCTGATACG-TCCTCTATCCGAGGACAATATATTAAATGGATTTTTGG-AGCAGGGAGATGGAATAGGAGCTTGCTCTGTCCACTCCACGCATCGACCTGGTATTGCAGTACCTCC</Hsp_qseq>
      <Hsp_hseq>ATCTGTTCTTATCAGCTTAATATCTGATATGTTGCTCATTGAGCAGCTCATATATTAAACTGATTTTTGGAACCAGGCTGTGAAAAAAAGGGCTTGCCTCGTCCCAGCCACGGGTTGCCTCGGTATAGCACTACCTCC</Hsp_hseq>
      <Hsp_midline>||||||||||||||| ||||||||||||| | | |||  |  |  |   ||||||||||  ||||||||| | ||||  |    || | | ||||||   ||||   |||||  | | |  ||||| ||| |||||||</Hsp_midline>
    </Hsp>
    <Hsp>
      <Hsp_num>4</Hsp_num>
      <Hsp_bit-score>41.8621</Hsp_bit-score>
      <Hsp_score>45</Hsp_score>
      <Hsp_evalue>0.271765</Hsp_evalue>
      <Hsp_query-from>1</Hsp_query-from>
      <Hsp_query-to>25</Hsp_query-to>
      <Hsp_hit-from>87314</Hsp_hit-from>
      <Hsp_hit-to>87290</Hsp_hit-to>
      <Hsp_query-frame>1</Hsp_query-frame>
      <Hsp_hit-frame>-1</Hsp_hit-frame>
      <Hsp_identity>24</Hsp_identity>
      <Hsp_positive>24</Hsp_positive>
      <Hsp_gaps>0</Hsp_gaps>
      <Hsp_align-len>25</Hsp_align-len>
      <Hsp_qseq>ATCGCTTCTCGGCCTTTTGGCTAAG</Hsp_qseq>
      <Hsp_hseq>ATCGCTTCTCGGCCTTTTGGCCAAG</Hsp_hseq>
      <Hsp_midline>||||||||||||||||||||| |||</Hsp_midline>
    </Hsp>
  </Hit_hsps>
</Hit>
<Hit>
  <Hit_num>6</Hit_num>
  <Hit_id>gi|1268737619|ref|NW_019218324.1|</Hit_id>
  <Hit_def>Stylophora pistillata isolate CSM Monaco unplaced genomic scaffold, Stylophora pistillata v1 Spis.scaffold541</Hit_def>
  <Hit_accession>NW_019218324</Hit_accession>
  <Hit_len>206534</Hit_len>
  <Hit_hsps>
    <Hsp>
      <Hsp_num>1</Hsp_num>
      <Hsp_bit-score>149.163</Hsp_bit-score>
      <Hsp_score>164</Hsp_score>
      <Hsp_evalue>7.27959e-34</Hsp_evalue>
      <Hsp_query-from>1</Hsp_query-from>
      <Hsp_query-to>173</Hsp_query-to>
      <Hsp_hit-from>6279</Hsp_hit-from>
      <Hsp_hit-to>6106</Hsp_hit-to>
      <Hsp_query-frame>1</Hsp_query-frame>
      <Hsp_hit-frame>-1</Hsp_hit-frame>
      <Hsp_identity>138</Hsp_identity>
      <Hsp_positive>138</Hsp_positive>
      <Hsp_gaps>1</Hsp_gaps>
      <Hsp_align-len>174</Hsp_align-len>
      <Hsp_qseq>ATCGCTTCTCGGCCTTTTGGCTAAGATCAAGTGTAGTATCTGTTCTTATCAGTTTAATATCTGATACG-TCCTCTATCCGAGGACAATATATTAAATGGATTTTTGGAGCAGGGAGATGGAATAGGAGCTTGCTCTGTCCACTCCACGCATCGACCTGGTATTGCAGTACCTCC</Hsp_qseq>
      <Hsp_hseq>ATCGCTTCTCGGCCTTTTGGCTAAGATCAAGTGTAGTATCTGTTCTTATCAGCTTAATATCTGATACGCTGCTCATTGAGTAGCTCATATATTAAACTGATTTTTGGAACTGGGCTGTGGAAAAGAGGCTTGCCTCGTCCCAGCCACGGGTTGCCTCGGTATAGCACTACCTCC</Hsp_hseq>
      <Hsp_midline>|||||||||||||||||||||||||||||||||||||||||||||||||||| ||||||||||||||| | |||  |  |  |   ||||||||||  |||||||||| | |||   ||||| ||  ||||||   ||||   |||||  | | |  ||||| ||| |||||||</Hsp_midline>
    </Hsp>
    <Hsp>
      <Hsp_num>2</Hsp_num>
      <Hsp_bit-score>77.9295</Hsp_bit-score>
      <Hsp_score>85</Hsp_score>
      <Hsp_evalue>3.77425e-12</Hsp_evalue>
      <Hsp_query-from>38</Hsp_query-from>
      <Hsp_query-to>173</Hsp_query-to>
      <Hsp_hit-from>6834</Hsp_hit-from>
      <Hsp_hit-to>6698</Hsp_hit-to>
      <Hsp_query-frame>1</Hsp_query-frame>
      <Hsp_hit-frame>-1</Hsp_hit-frame>
      <Hsp_identity>100</Hsp_identity>
      <Hsp_positive>100</Hsp_positive>
      <Hsp_gaps>1</Hsp_gaps>
      <Hsp_align-len>137</Hsp_align-len>
      <Hsp_qseq>ATCTGTTCTTATCAGTTTAATATCTGATACG-TCCTCTATCCGAGGACAATATATTAAATGGATTTTTGGAGCAGGGAGATGGAATAGGAGCTTGCTCTGTCCACTCCACGCATCGACCTGGTATTGCAGTACCTCC</Hsp_qseq>
      <Hsp_hseq>ATCTTTTCTTATCAGCTTAATATCTGATACGCTGCTCATTGAGTAGCTCATATATTAAACTGATTTTTGGAACTGGGCTGTGGAAAAGAGGCTTGCCTCGTCCCAGCCACGGGTTGCCTCGGTATAGCACTACCTCC</Hsp_hseq>
      <Hsp_midline>|||| |||||||||| ||||||||||||||| | |||  |  |  |   ||||||||||  |||||||||| | |||   ||||| ||  ||||||   ||||   |||||  | | |  ||||| ||| |||||||</Hsp_midline>
    </Hsp>
    <Hsp>
      <Hsp_num>3</Hsp_num>
      <Hsp_bit-score>60.7975</Hsp_bit-score>
      <Hsp_score>66</Hsp_score>
      <Hsp_evalue>2.90164e-07</Hsp_evalue>
      <Hsp_query-from>1</Hsp_query-from>
      <Hsp_query-to>33</Hsp_query-to>
      <Hsp_hit-from>4198</Hsp_hit-from>
      <Hsp_hit-to>4166</Hsp_hit-to>
      <Hsp_query-frame>1</Hsp_query-frame>
      <Hsp_hit-frame>-1</Hsp_hit-frame>
      <Hsp_identity>33</Hsp_identity>
      <Hsp_positive>33</Hsp_positive>
      <Hsp_gaps>0</Hsp_gaps>
      <Hsp_align-len>33</Hsp_align-len>
      <Hsp_qseq>ATCGCTTCTCGGCCTTTTGGCTAAGATCAAGTG</Hsp_qseq>
      <Hsp_hseq>ATCGCTTCTCGGCCTTTTGGCTAAGATCAAGTG</Hsp_hseq>
      <Hsp_midline>|||||||||||||||||||||||||||||||||</Hsp_midline>
    </Hsp>
    <Hsp>
      <Hsp_num>4</Hsp_num>
      <Hsp_bit-score>45.4688</Hsp_bit-score>
      <Hsp_score>49</Hsp_score>
      <Hsp_evalue>0.0223078</Hsp_evalue>
      <Hsp_query-from>1</Hsp_query-from>
      <Hsp_query-to>29</Hsp_query-to>
      <Hsp_hit-from>20536</Hsp_hit-from>
      <Hsp_hit-to>20509</Hsp_hit-to>
      <Hsp_query-frame>1</Hsp_query-frame>
      <Hsp_hit-frame>-1</Hsp_hit-frame>
      <Hsp_identity>28</Hsp_identity>
      <Hsp_positive>28</Hsp_positive>
      <Hsp_gaps>1</Hsp_gaps>
      <Hsp_align-len>29</Hsp_align-len>
      <Hsp_qseq>ATCGCTTCTCGGCCTTTTGGCTAAGATCA</Hsp_qseq>
      <Hsp_hseq>ATCGCTTCTCGGCCTTTTGGCT-AGATCA</Hsp_hseq>
      <Hsp_midline>|||||||||||||||||||||| ||||||</Hsp_midline>
    </Hsp>
    <Hsp>
      <Hsp_num>5</Hsp_num>
      <Hsp_bit-score>39.157</Hsp_bit-score>
      <Hsp_score>42</Hsp_score>
      <Hsp_evalue>0.948552</Hsp_evalue>
      <Hsp_query-from>1</Hsp_query-from>
      <Hsp_query-to>28</Hsp_query-to>
      <Hsp_hit-from>14548</Hsp_hit-from>
      <Hsp_hit-to>14522</Hsp_hit-to>
      <Hsp_query-frame>1</Hsp_query-frame>
      <Hsp_hit-frame>-1</Hsp_hit-frame>
      <Hsp_identity>26</Hsp_identity>
      <Hsp_positive>26</Hsp_positive>
      <Hsp_gaps>1</Hsp_gaps>
      <Hsp_align-len>28</Hsp_align-len>
      <Hsp_qseq>ATCGCTTCTCGGCCTTTTGGCTAAGATC</Hsp_qseq>
      <Hsp_hseq>ATCGCTTCTTGGCCTTTTGGCT-AGATC</Hsp_hseq>
      <Hsp_midline>||||||||| |||||||||||| |||||</Hsp_midline>
    </Hsp>
  </Hit_hsps>
</Hit>
<Hit>
  <Hit_num>7</Hit_num>
  <Hit_id>gi|1004128491|ref|NW_015441080.1|</Hit_id>
  <Hit_def>Acropora digitifera unplaced genomic scaffold, Adig_1.1 DF970715.1</Hit_def>
  <Hit_accession>NW_015441080</Hit_accession>
  <Hit_len>1289176</Hit_len>
  <Hit_hsps>
    <Hsp>
      <Hsp_num>1</Hsp_num>
      <Hsp_bit-score>149.163</Hsp_bit-score>
      <Hsp_score>164</Hsp_score>
      <Hsp_evalue>7.27959e-34</Hsp_evalue>
      <Hsp_query-from>1</Hsp_query-from>
      <Hsp_query-to>173</Hsp_query-to>
      <Hsp_hit-from>610775</Hsp_hit-from>
      <Hsp_hit-to>610602</Hsp_hit-to>
      <Hsp_query-frame>1</Hsp_query-frame>
      <Hsp_hit-frame>-1</Hsp_hit-frame>
      <Hsp_identity>138</Hsp_identity>
      <Hsp_positive>138</Hsp_positive>
      <Hsp_gaps>1</Hsp_gaps>
      <Hsp_align-len>174</Hsp_align-len>
      <Hsp_qseq>ATCGCTTCTCGGCCTTTTGGCTAAGATCAAGTGTAGTATCTGTTCTTATCAGTTTAATATCTGATACG-TCCTCTATCCGAGGACAATATATTAAATGGATTTTTGGAGCAGGGAGATGGAATAGGAGCTTGCTCTGTCCACTCCACGCATCGACCTGGTATTGCAGTACCTCC</Hsp_qseq>
      <Hsp_hseq>ATCGCTTCTCGGCCTTTTGGCTAAGATCAAGTGTAGTATCTGTTCTTATCAGCTTAATATCTGATACGCTGCTCATTGAGCAGCTCATATATTAAACTGATTTTTGGAACCGGGCTGTGGAAAAGAGGCTTGCCTCGTCCCAGCCACGGGTTGCCTCGGTATAGCACTACCTCC</Hsp_hseq>
      <Hsp_midline>|||||||||||||||||||||||||||||||||||||||||||||||||||| ||||||||||||||| | |||  |  |  |   ||||||||||  |||||||||| | |||   ||||| ||  ||||||   ||||   |||||  | | |  ||||| ||| |||||||</Hsp_midline>
    </Hsp>
    <Hsp>
      <Hsp_num>2</Hsp_num>
      <Hsp_bit-score>149.163</Hsp_bit-score>
      <Hsp_score>164</Hsp_score>
      <Hsp_evalue>7.27959e-34</Hsp_evalue>
      <Hsp_query-from>1</Hsp_query-from>
      <Hsp_query-to>173</Hsp_query-to>
      <Hsp_hit-from>612575</Hsp_hit-from>
      <Hsp_hit-to>612402</Hsp_hit-to>
      <Hsp_query-frame>1</Hsp_query-frame>
      <Hsp_hit-frame>-1</Hsp_hit-frame>
      <Hsp_identity>138</Hsp_identity>
      <Hsp_positive>138</Hsp_positive>
      <Hsp_gaps>1</Hsp_gaps>
      <Hsp_align-len>174</Hsp_align-len>
      <Hsp_qseq>ATCGCTTCTCGGCCTTTTGGCTAAGATCAAGTGTAGTATCTGTTCTTATCAGTTTAATATCTGATACG-TCCTCTATCCGAGGACAATATATTAAATGGATTTTTGGAGCAGGGAGATGGAATAGGAGCTTGCTCTGTCCACTCCACGCATCGACCTGGTATTGCAGTACCTCC</Hsp_qseq>
      <Hsp_hseq>ATCGCTTCTCGGCCTTTTGGCTAAGATCAAGTGTAGTATCTGTTCTTATCAGCTTAATATCTGATACGCTGCTCATTGAGCAGCTCATATATTAAACTGATTTTTGGAACCGGGCTGTGGAAAAGAGGCTTGCCTCGTCCCAGCCACGGGTTGCCTCGGTATAGCACTACCTCC</Hsp_hseq>
      <Hsp_midline>|||||||||||||||||||||||||||||||||||||||||||||||||||| ||||||||||||||| | |||  |  |  |   ||||||||||  |||||||||| | |||   ||||| ||  ||||||   ||||   |||||  | | |  ||||| ||| |||||||</Hsp_midline>
    </Hsp>
    <Hsp>
      <Hsp_num>3</Hsp_num>
      <Hsp_bit-score>149.163</Hsp_bit-score>
      <Hsp_score>164</Hsp_score>
      <Hsp_evalue>7.27959e-34</Hsp_evalue>
      <Hsp_query-from>1</Hsp_query-from>
      <Hsp_query-to>173</Hsp_query-to>
      <Hsp_hit-from>649451</Hsp_hit-from>
      <Hsp_hit-to>649278</Hsp_hit-to>
      <Hsp_query-frame>1</Hsp_query-frame>
      <Hsp_hit-frame>-1</Hsp_hit-frame>
      <Hsp_identity>138</Hsp_identity>
      <Hsp_positive>138</Hsp_positive>
      <Hsp_gaps>1</Hsp_gaps>
      <Hsp_align-len>174</Hsp_align-len>
      <Hsp_qseq>ATCGCTTCTCGGCCTTTTGGCTAAGATCAAGTGTAGTATCTGTTCTTATCAGTTTAATATCTGATACG-TCCTCTATCCGAGGACAATATATTAAATGGATTTTTGGAGCAGGGAGATGGAATAGGAGCTTGCTCTGTCCACTCCACGCATCGACCTGGTATTGCAGTACCTCC</Hsp_qseq>
      <Hsp_hseq>ATCGCTTCTCGGCCTTTTGGCTAAGATCAAGTGTAGTATCTGTTCTTATCAGCTTAATATCTGATACGCTGCTCATTGAGCAGCTCATATATTAAACTGATTTTTGGAACCGGGCTGTGGAAAAGAGGCTTGCCTCGTCCCAGCCACGGGTTGCCTCGGTATAGCACTACCTCC</Hsp_hseq>
      <Hsp_midline>|||||||||||||||||||||||||||||||||||||||||||||||||||| ||||||||||||||| | |||  |  |  |   ||||||||||  |||||||||| | |||   ||||| ||  ||||||   ||||   |||||  | | |  ||||| ||| |||||||</Hsp_midline>
    </Hsp>
    <Hsp>
      <Hsp_num>4</Hsp_num>
      <Hsp_bit-score>149.163</Hsp_bit-score>
      <Hsp_score>164</Hsp_score>
      <Hsp_evalue>7.27959e-34</Hsp_evalue>
      <Hsp_query-from>1</Hsp_query-from>
      <Hsp_query-to>173</Hsp_query-to>
      <Hsp_hit-from>681540</Hsp_hit-from>
      <Hsp_hit-to>681367</Hsp_hit-to>
      <Hsp_query-frame>1</Hsp_query-frame>
      <Hsp_hit-frame>-1</Hsp_hit-frame>
      <Hsp_identity>138</Hsp_identity>
      <Hsp_positive>138</Hsp_positive>
      <Hsp_gaps>1</Hsp_gaps>
      <Hsp_align-len>174</Hsp_align-len>
      <Hsp_qseq>ATCGCTTCTCGGCCTTTTGGCTAAGATCAAGTGTAGTATCTGTTCTTATCAGTTTAATATCTGATACG-TCCTCTATCCGAGGACAATATATTAAATGGATTTTTGGAGCAGGGAGATGGAATAGGAGCTTGCTCTGTCCACTCCACGCATCGACCTGGTATTGCAGTACCTCC</Hsp_qseq>
      <Hsp_hseq>ATCGCTTCTCGGCCTTTTGGCTAAGATCAAGTGTAGTATCTGTTCTTATCAGCTTAATATCTGATACGCTGCTCATTGAGCAGCTCATATATTAAACTGATTTTTGGAACCGGGCTGTGGAAAAGAGGCTTGCCTCGTCCCAGCCACGGGTTGCCTCGGTATAGCACTACCTCC</Hsp_hseq>
      <Hsp_midline>|||||||||||||||||||||||||||||||||||||||||||||||||||| ||||||||||||||| | |||  |  |  |   ||||||||||  |||||||||| | |||   ||||| ||  ||||||   ||||   |||||  | | |  ||||| ||| |||||||</Hsp_midline>
    </Hsp>
    <Hsp>
      <Hsp_num>5</Hsp_num>
      <Hsp_bit-score>149.163</Hsp_bit-score>
      <Hsp_score>164</Hsp_score>
      <Hsp_evalue>7.27959e-34</Hsp_evalue>
      <Hsp_query-from>1</Hsp_query-from>
      <Hsp_query-to>173</Hsp_query-to>
      <Hsp_hit-from>752278</Hsp_hit-from>
      <Hsp_hit-to>752105</Hsp_hit-to>
      <Hsp_query-frame>1</Hsp_query-frame>
      <Hsp_hit-frame>-1</Hsp_hit-frame>
      <Hsp_identity>138</Hsp_identity>
      <Hsp_positive>138</Hsp_positive>
      <Hsp_gaps>1</Hsp_gaps>
      <Hsp_align-len>174</Hsp_align-len>
      <Hsp_qseq>ATCGCTTCTCGGCCTTTTGGCTAAGATCAAGTGTAGTATCTGTTCTTATCAGTTTAATATCTGATACG-TCCTCTATCCGAGGACAATATATTAAATGGATTTTTGGAGCAGGGAGATGGAATAGGAGCTTGCTCTGTCCACTCCACGCATCGACCTGGTATTGCAGTACCTCC</Hsp_qseq>
      <Hsp_hseq>ATCGCTTCTCGGCCTTTTGGCTAAGATCAAGTGTAGTATCTGTTCTTATCAGCTTAATATCTGATACGCTGCTCATTGAGCAGCTCATATATTAAACTGATTTTTGGAACCGGGCTGTGGAAAAGAGGCTTGCCTCGTCCCAGCCACGGGTTGCCTCGGTATAGCACTACCTCC</Hsp_hseq>
      <Hsp_midline>|||||||||||||||||||||||||||||||||||||||||||||||||||| ||||||||||||||| | |||  |  |  |   ||||||||||  |||||||||| | |||   ||||| ||  ||||||   ||||   |||||  | | |  ||||| ||| |||||||</Hsp_midline>
    </Hsp>
    <Hsp>
      <Hsp_num>6</Hsp_num>
      <Hsp_bit-score>135.637</Hsp_bit-score>
      <Hsp_score>149</Hsp_score>
      <Hsp_evalue>1.60344e-29</Hsp_evalue>
      <Hsp_query-from>1</Hsp_query-from>
      <Hsp_query-to>173</Hsp_query-to>
      <Hsp_hit-from>633508</Hsp_hit-from>
      <Hsp_hit-to>633335</Hsp_hit-to>
      <Hsp_query-frame>1</Hsp_query-frame>
      <Hsp_hit-frame>-1</Hsp_hit-frame>
      <Hsp_identity>135</Hsp_identity>
      <Hsp_positive>135</Hsp_positive>
      <Hsp_gaps>1</Hsp_gaps>
      <Hsp_align-len>174</Hsp_align-len>
      <Hsp_qseq>ATCGCTTCTCGGCCTTTTGGCTAAGATCAAGTGTAGTATCTGTTCTTATCAGTTTAATATCTGATACG-TCCTCTATCCGAGGACAATATATTAAATGGATTTTTGGAGCAGGGAGATGGAATAGGAGCTTGCTCTGTCCACTCCACGCATCGACCTGGTATTGCAGTACCTCC</Hsp_qseq>
      <Hsp_hseq>ATCGCTTCTCGGCCTTTTGGCTAAGATCAAGTGTAGTATCTGTTCTTATCAGCTTAATATCTGATACGCTGCTCATTGAGCAGCTCATATATTAAACTGATTTTTGGAACCGGGCTGTGGAAAATAGGCTTGCCTCGTCCCAGTCACGGGTTGCCTCGGTATAGCACTACTTCC</Hsp_hseq>
      <Hsp_midline>|||||||||||||||||||||||||||||||||||||||||||||||||||| ||||||||||||||| | |||  |  |  |   ||||||||||  |||||||||| | |||   ||||| |   ||||||   ||||    ||||  | | |  ||||| ||| ||| |||</Hsp_midline>
    </Hsp>
    <Hsp>
      <Hsp_num>7</Hsp_num>
      <Hsp_bit-score>82.4379</Hsp_bit-score>
      <Hsp_score>90</Hsp_score>
      <Hsp_evalue>8.87619e-14</Hsp_evalue>
      <Hsp_query-from>38</Hsp_query-from>
      <Hsp_query-to>173</Hsp_query-to>
      <Hsp_hit-from>655556</Hsp_hit-from>
      <Hsp_hit-to>655420</Hsp_hit-to>
      <Hsp_query-frame>1</Hsp_query-frame>
      <Hsp_hit-frame>-1</Hsp_hit-frame>
      <Hsp_identity>101</Hsp_identity>
      <Hsp_positive>101</Hsp_positive>
      <Hsp_gaps>1</Hsp_gaps>
      <Hsp_align-len>137</Hsp_align-len>
      <Hsp_qseq>ATCTGTTCTTATCAGTTTAATATCTGATACG-TCCTCTATCCGAGGACAATATATTAAATGGATTTTTGGAGCAGGGAGATGGAATAGGAGCTTGCTCTGTCCACTCCACGCATCGACCTGGTATTGCAGTACCTCC</Hsp_qseq>
      <Hsp_hseq>ATCTGTTCTTATCAGCTTAATATCTGATACGCTGCTCATTGAGCAGCTCATATATTAAACTGATTTTTGGAACCGGGCTGTGGAAAAGAGGCTTGCCTCGTCCCAGCCACGGGTTGCCTCGGTATAGCACTACCTCC</Hsp_hseq>
      <Hsp_midline>||||||||||||||| ||||||||||||||| | |||  |  |  |   ||||||||||  |||||||||| | |||   ||||| ||  ||||||   ||||   |||||  | | |  ||||| ||| |||||||</Hsp_midline>
    </Hsp>
    <Hsp>
      <Hsp_num>8</Hsp_num>
      <Hsp_bit-score>76.1261</Hsp_bit-score>
      <Hsp_score>83</Hsp_score>
      <Hsp_evalue>1.31734e-11</Hsp_evalue>
      <Hsp_query-from>38</Hsp_query-from>
      <Hsp_query-to>172</Hsp_query-to>
      <Hsp_hit-from>670437</Hsp_hit-from>
      <Hsp_hit-to>670302</Hsp_hit-to>
      <Hsp_query-frame>1</Hsp_query-frame>
      <Hsp_hit-frame>-1</Hsp_hit-frame>
      <Hsp_identity>99</Hsp_identity>
      <Hsp_positive>99</Hsp_positive>
      <Hsp_gaps>1</Hsp_gaps>
      <Hsp_align-len>136</Hsp_align-len>
      <Hsp_qseq>ATCTGTTCTTATCAGTTTAATATCTGATACG-TCCTCTATCCGAGGACAATATATTAAATGGATTTTTGGAGCAGGGAGATGGAATAGGAGCTTGCTCTGTCCACTCCACGCATCGACCTGGTATTGCAGTACCTC</Hsp_qseq>
      <Hsp_hseq>ATCTGTTCTTATCAGCTTAATATCTGATATGCTGCTCATTGAGCAGCTCATATATTACACTGATTTTTGGAACTGGGCTGTGGAAAAGAGGCTTGCCTCGTCCCAGCCACGGGTTGCCTTGGTATAGCACTACCTC</Hsp_hseq>
      <Hsp_midline>||||||||||||||| ||||||||||||| | | |||  |  |  |   |||||||| |  |||||||||| | |||   ||||| ||  ||||||   ||||   |||||  | | | |||||| ||| ||||||</Hsp_midline>
    </Hsp>
    <Hsp>
      <Hsp_num>9</Hsp_num>
      <Hsp_bit-score>73.4211</Hsp_bit-score>
      <Hsp_score>80</Hsp_score>
      <Hsp_evalue>4.59798e-11</Hsp_evalue>
      <Hsp_query-from>38</Hsp_query-from>
      <Hsp_query-to>173</Hsp_query-to>
      <Hsp_hit-from>739187</Hsp_hit-from>
      <Hsp_hit-to>739051</Hsp_hit-to>
      <Hsp_query-frame>1</Hsp_query-frame>
      <Hsp_hit-frame>-1</Hsp_hit-frame>
      <Hsp_identity>99</Hsp_identity>
      <Hsp_positive>99</Hsp_positive>
      <Hsp_gaps>1</Hsp_gaps>
      <Hsp_align-len>137</Hsp_align-len>
      <Hsp_qseq>ATCTGTTCTTATCAGTTTAATATCTGATACG-TCCTCTATCCGAGGACAATATATTAAATGGATTTTTGGAGCAGGGAGATGGAATAGGAGCTTGCTCTGTCCACTCCACGCATCGACCTGGTATTGCAGTACCTCC</Hsp_qseq>
      <Hsp_hseq>ATCTGTTCTTATCAGCTTAATATCTGATATGCTGCTCATTGAGCAGCTCATATATTAAACTGATTTTTGGAACCGGGCTGTGGAAAAGAGGCTTGCCTCGTCCCAGTCACGGGTTGCCTCGGTATAGCACTACCTCC</Hsp_hseq>
      <Hsp_midline>||||||||||||||| ||||||||||||| | | |||  |  |  |   ||||||||||  |||||||||| | |||   ||||| ||  ||||||   ||||    ||||  | | |  ||||| ||| |||||||</Hsp_midline>
    </Hsp>
    <Hsp>
      <Hsp_num>10</Hsp_num>
      <Hsp_bit-score>73.4211</Hsp_bit-score>
      <Hsp_score>80</Hsp_score>
      <Hsp_evalue>4.59798e-11</Hsp_evalue>
      <Hsp_query-from>38</Hsp_query-from>
      <Hsp_query-to>173</Hsp_query-to>
      <Hsp_hit-from>757694</Hsp_hit-from>
      <Hsp_hit-to>757558</Hsp_hit-to>
      <Hsp_query-frame>1</Hsp_query-frame>
      <Hsp_hit-frame>-1</Hsp_hit-frame>
      <Hsp_identity>99</Hsp_identity>
      <Hsp_positive>99</Hsp_positive>
      <Hsp_gaps>1</Hsp_gaps>
      <Hsp_align-len>137</Hsp_align-len>
      <Hsp_qseq>ATCTGTTCTTATCAGTTTAATATCTGATACG-TCCTCTATCCGAGGACAATATATTAAATGGATTTTTGGAGCAGGGAGATGGAATAGGAGCTTGCTCTGTCCACTCCACGCATCGACCTGGTATTGCAGTACCTCC</Hsp_qseq>
      <Hsp_hseq>ATCTGTTCTTATCAGCTTAATATCCGATATGCTGCTCATTAAGCAGCTCATATATTAAACTGATTTTTGGAACCGGGCTGTGGAAAAGAGGCTTGCCTCGTCCCAGCCACGAGTTGCCTCGGTATAGCACTACCTCC</Hsp_hseq>
      <Hsp_midline>||||||||||||||| |||||||| |||| | | |||  |  |  |   ||||||||||  |||||||||| | |||   ||||| ||  ||||||   ||||   |||||  | | |  ||||| ||| |||||||</Hsp_midline>
    </Hsp>
    <Hsp>
      <Hsp_num>11</Hsp_num>
      <Hsp_bit-score>68.9126</Hsp_bit-score>
      <Hsp_score>75</Hsp_score>
      <Hsp_evalue>1.95511e-09</Hsp_evalue>
      <Hsp_query-from>38</Hsp_query-from>
      <Hsp_query-to>173</Hsp_query-to>
      <Hsp_hit-from>745053</Hsp_hit-from>
      <Hsp_hit-to>744917</Hsp_hit-to>
      <Hsp_query-frame>1</Hsp_query-frame>
      <Hsp_hit-frame>-1</Hsp_hit-frame>
      <Hsp_identity>98</Hsp_identity>
      <Hsp_positive>98</Hsp_positive>
      <Hsp_gaps>1</Hsp_gaps>
      <Hsp_align-len>137</Hsp_align-len>
      <Hsp_qseq>ATCTGTTCTTATCAGTTTAATATCTGATACG-TCCTCTATCCGAGGACAATATATTAAATGGATTTTTGGAGCAGGGAGATGGAATAGGAGCTTGCTCTGTCCACTCCACGCATCGACCTGGTATTGCAGTACCTCC</Hsp_qseq>
      <Hsp_hseq>ATCAGTTCTTATCAGCTTAATATCTGATACGCTGCTCATTGAGCAGCTCATATATTGAACTGATTTTTGGAACCGGGCTGTGGAAAAGAGGCTTGCCTCATCCCAGCCACGGGTTGCCTCGGTATAGCACTACCTCC</Hsp_hseq>
      <Hsp_midline>||| ||||||||||| ||||||||||||||| | |||  |  |  |   ||||||| ||  |||||||||| | |||   ||||| ||  ||||||    |||   |||||  | | |  ||||| ||| |||||||</Hsp_midline>
    </Hsp>
    <Hsp>
      <Hsp_num>12</Hsp_num>
      <Hsp_bit-score>58.0924</Hsp_bit-score>
      <Hsp_score>63</Hsp_score>
      <Hsp_evalue>3.53492e-06</Hsp_evalue>
      <Hsp_query-from>1</Hsp_query-from>
      <Hsp_query-to>34</Hsp_query-to>
      <Hsp_hit-from>731538</Hsp_hit-from>
      <Hsp_hit-to>731505</Hsp_hit-to>
      <Hsp_query-frame>1</Hsp_query-frame>
      <Hsp_hit-frame>-1</Hsp_hit-frame>
      <Hsp_identity>33</Hsp_identity>
      <Hsp_positive>33</Hsp_positive>
      <Hsp_gaps>0</Hsp_gaps>
      <Hsp_align-len>34</Hsp_align-len>
      <Hsp_qseq>ATCGCTTCTCGGCCTTTTGGCTAAGATCAAGTGT</Hsp_qseq>
      <Hsp_hseq>ATCGCTTCTCGGCCTTTTGGCTAAGATCAAGAGT</Hsp_hseq>
      <Hsp_midline>||||||||||||||||||||||||||||||| ||</Hsp_midline>
    </Hsp>
    <Hsp>
      <Hsp_num>13</Hsp_num>
      <Hsp_bit-score>48.1739</Hsp_bit-score>
      <Hsp_score>52</Hsp_score>
      <Hsp_evalue>0.00183114</Hsp_evalue>
      <Hsp_query-from>1</Hsp_query-from>
      <Hsp_query-to>26</Hsp_query-to>
      <Hsp_hit-from>657050</Hsp_hit-from>
      <Hsp_hit-to>657025</Hsp_hit-to>
      <Hsp_query-frame>1</Hsp_query-frame>
      <Hsp_hit-frame>-1</Hsp_hit-frame>
      <Hsp_identity>26</Hsp_identity>
      <Hsp_positive>26</Hsp_positive>
      <Hsp_gaps>0</Hsp_gaps>
      <Hsp_align-len>26</Hsp_align-len>
      <Hsp_qseq>ATCGCTTCTCGGCCTTTTGGCTAAGA</Hsp_qseq>
      <Hsp_hseq>ATCGCTTCTCGGCCTTTTGGCTAAGA</Hsp_hseq>
      <Hsp_midline>||||||||||||||||||||||||||</Hsp_midline>
    </Hsp>
    <Hsp>
      <Hsp_num>14</Hsp_num>
      <Hsp_bit-score>47.2722</Hsp_bit-score>
      <Hsp_score>51</Hsp_score>
      <Hsp_evalue>0.00639129</Hsp_evalue>
      <Hsp_query-from>1</Hsp_query-from>
      <Hsp_query-to>28</Hsp_query-to>
      <Hsp_hit-from>653789</Hsp_hit-from>
      <Hsp_hit-to>653762</Hsp_hit-to>
      <Hsp_query-frame>1</Hsp_query-frame>
      <Hsp_hit-frame>-1</Hsp_hit-frame>
      <Hsp_identity>27</Hsp_identity>
      <Hsp_positive>27</Hsp_positive>
      <Hsp_gaps>0</Hsp_gaps>
      <Hsp_align-len>28</Hsp_align-len>
      <Hsp_qseq>ATCGCTTCTCGGCCTTTTGGCTAAGATC</Hsp_qseq>
      <Hsp_hseq>ATCGCTTCTCGGCCTTTTGGCCAAGATC</Hsp_hseq>
      <Hsp_midline>||||||||||||||||||||| ||||||</Hsp_midline>
    </Hsp>
    <Hsp>
      <Hsp_num>15</Hsp_num>
      <Hsp_bit-score>41.8621</Hsp_bit-score>
      <Hsp_score>45</Hsp_score>
      <Hsp_evalue>0.271765</Hsp_evalue>
      <Hsp_query-from>1</Hsp_query-from>
      <Hsp_query-to>25</Hsp_query-to>
      <Hsp_hit-from>638222</Hsp_hit-from>
      <Hsp_hit-to>638246</Hsp_hit-to>
      <Hsp_query-frame>1</Hsp_query-frame>
      <Hsp_hit-frame>1</Hsp_hit-frame>
      <Hsp_identity>24</Hsp_identity>
      <Hsp_positive>24</Hsp_positive>
      <Hsp_gaps>0</Hsp_gaps>
      <Hsp_align-len>25</Hsp_align-len>
      <Hsp_qseq>ATCGCTTCTCGGCCTTTTGGCTAAG</Hsp_qseq>
      <Hsp_hseq>ATCGCTTCTCGGCCTTTTGGCCAAG</Hsp_hseq>
      <Hsp_midline>||||||||||||||||||||| |||</Hsp_midline>
    </Hsp>
    <Hsp>
      <Hsp_num>16</Hsp_num>
      <Hsp_bit-score>41.8621</Hsp_bit-score>
      <Hsp_score>45</Hsp_score>
      <Hsp_evalue>0.271765</Hsp_evalue>
      <Hsp_query-from>1</Hsp_query-from>
      <Hsp_query-to>25</Hsp_query-to>
      <Hsp_hit-from>642777</Hsp_hit-from>
      <Hsp_hit-to>642753</Hsp_hit-to>
      <Hsp_query-frame>1</Hsp_query-frame>
      <Hsp_hit-frame>-1</Hsp_hit-frame>
      <Hsp_identity>24</Hsp_identity>
      <Hsp_positive>24</Hsp_positive>
      <Hsp_gaps>0</Hsp_gaps>
      <Hsp_align-len>25</Hsp_align-len>
      <Hsp_qseq>ATCGCTTCTCGGCCTTTTGGCTAAG</Hsp_qseq>
      <Hsp_hseq>ATCGCTTCTCGGCCTTTTGGCCAAG</Hsp_hseq>
      <Hsp_midline>||||||||||||||||||||| |||</Hsp_midline>
    </Hsp>
    <Hsp>
      <Hsp_num>17</Hsp_num>
      <Hsp_bit-score>41.8621</Hsp_bit-score>
      <Hsp_score>45</Hsp_score>
      <Hsp_evalue>0.271765</Hsp_evalue>
      <Hsp_query-from>1</Hsp_query-from>
      <Hsp_query-to>25</Hsp_query-to>
      <Hsp_hit-from>675387</Hsp_hit-from>
      <Hsp_hit-to>675363</Hsp_hit-to>
      <Hsp_query-frame>1</Hsp_query-frame>
      <Hsp_hit-frame>-1</Hsp_hit-frame>
      <Hsp_identity>24</Hsp_identity>
      <Hsp_positive>24</Hsp_positive>
      <Hsp_gaps>0</Hsp_gaps>
      <Hsp_align-len>25</Hsp_align-len>
      <Hsp_qseq>ATCGCTTCTCGGCCTTTTGGCTAAG</Hsp_qseq>
      <Hsp_hseq>ATCGCTTCTCGGCCTTTTTGCTAAG</Hsp_hseq>
      <Hsp_midline>|||||||||||||||||| ||||||</Hsp_midline>
    </Hsp>
    <Hsp>
      <Hsp_num>18</Hsp_num>
      <Hsp_bit-score>40.9604</Hsp_bit-score>
      <Hsp_score>44</Hsp_score>
      <Hsp_evalue>0.271765</Hsp_evalue>
      <Hsp_query-from>1</Hsp_query-from>
      <Hsp_query-to>27</Hsp_query-to>
      <Hsp_hit-from>696570</Hsp_hit-from>
      <Hsp_hit-to>696544</Hsp_hit-to>
      <Hsp_query-frame>1</Hsp_query-frame>
      <Hsp_hit-frame>-1</Hsp_hit-frame>
      <Hsp_identity>25</Hsp_identity>
      <Hsp_positive>25</Hsp_positive>
      <Hsp_gaps>0</Hsp_gaps>
      <Hsp_align-len>27</Hsp_align-len>
      <Hsp_qseq>ATCGCTTCTCGGCCTTTTGGCTAAGAT</Hsp_qseq>
      <Hsp_hseq>ATCGCTTCTCGGCCTTCTGGCCAAGAT</Hsp_hseq>
      <Hsp_midline>|||||||||||||||| |||| |||||</Hsp_midline>
    </Hsp>
    <Hsp>
      <Hsp_num>19</Hsp_num>
      <Hsp_bit-score>40.9604</Hsp_bit-score>
      <Hsp_score>44</Hsp_score>
      <Hsp_evalue>0.271765</Hsp_evalue>
      <Hsp_query-from>1</Hsp_query-from>
      <Hsp_query-to>22</Hsp_query-to>
      <Hsp_hit-from>749897</Hsp_hit-from>
      <Hsp_hit-to>749876</Hsp_hit-to>
      <Hsp_query-frame>1</Hsp_query-frame>
      <Hsp_hit-frame>-1</Hsp_hit-frame>
      <Hsp_identity>22</Hsp_identity>
      <Hsp_positive>22</Hsp_positive>
      <Hsp_gaps>0</Hsp_gaps>
      <Hsp_align-len>22</Hsp_align-len>
      <Hsp_qseq>ATCGCTTCTCGGCCTTTTGGCT</Hsp_qseq>
      <Hsp_hseq>ATCGCTTCTCGGCCTTTTGGCT</Hsp_hseq>
      <Hsp_midline>||||||||||||||||||||||</Hsp_midline>
    </Hsp>
    <Hsp>
      <Hsp_num>20</Hsp_num>
      <Hsp_bit-score>37.3537</Hsp_bit-score>
      <Hsp_score>40</Hsp_score>
      <Hsp_evalue>3.31077</Hsp_evalue>
      <Hsp_query-from>1</Hsp_query-from>
      <Hsp_query-to>25</Hsp_query-to>
      <Hsp_hit-from>763903</Hsp_hit-from>
      <Hsp_hit-to>763879</Hsp_hit-to>
      <Hsp_query-frame>1</Hsp_query-frame>
      <Hsp_hit-frame>-1</Hsp_hit-frame>
      <Hsp_identity>23</Hsp_identity>
      <Hsp_positive>23</Hsp_positive>
      <Hsp_gaps>0</Hsp_gaps>
      <Hsp_align-len>25</Hsp_align-len>
      <Hsp_qseq>ATCGCTTCTCGGCCTTTTGGCTAAG</Hsp_qseq>
      <Hsp_hseq>ATCGCTTCTCGGCCTTTTAGCTTAG</Hsp_hseq>
      <Hsp_midline>|||||||||||||||||| ||| ||</Hsp_midline>
    </Hsp>
  </Hit_hsps>
</Hit>
<Hit>
  <Hit_num>8</Hit_num>
  <Hit_id>gi|1004128476|ref|NW_015441095.1|</Hit_id>
  <Hit_def>Acropora digitifera unplaced genomic scaffold, Adig_1.1 DF970730.1</Hit_def>
  <Hit_accession>NW_015441095</Hit_accession>
  <Hit_len>1168610</Hit_len>
  <Hit_hsps>
    <Hsp>
      <Hsp_num>1</Hsp_num>
      <Hsp_bit-score>149.163</Hsp_bit-score>
      <Hsp_score>164</Hsp_score>
      <Hsp_evalue>7.27959e-34</Hsp_evalue>
      <Hsp_query-from>1</Hsp_query-from>
      <Hsp_query-to>173</Hsp_query-to>
      <Hsp_hit-from>184113</Hsp_hit-from>
      <Hsp_hit-to>183940</Hsp_hit-to>
      <Hsp_query-frame>1</Hsp_query-frame>
      <Hsp_hit-frame>-1</Hsp_hit-frame>
      <Hsp_identity>138</Hsp_identity>
      <Hsp_positive>138</Hsp_positive>
      <Hsp_gaps>1</Hsp_gaps>
      <Hsp_align-len>174</Hsp_align-len>
      <Hsp_qseq>ATCGCTTCTCGGCCTTTTGGCTAAGATCAAGTGTAGTATCTGTTCTTATCAGTTTAATATCTGATACG-TCCTCTATCCGAGGACAATATATTAAATGGATTTTTGGAGCAGGGAGATGGAATAGGAGCTTGCTCTGTCCACTCCACGCATCGACCTGGTATTGCAGTACCTCC</Hsp_qseq>
      <Hsp_hseq>ATCGCTTCTCGGCCTTTTGGCTAAGATCAAGTGTAGTATCTGTTCTTATCAGCTTAATATCTGATACGCTGCTCATTGAGCAGCTCATATATTAAACTGATTTTTGGAACCGGGCTGTGGAAAAGAGGCTTGCCTCGTCCCAGCCACGGGTTGCCTCGGTATAGCACTACCTCC</Hsp_hseq>
      <Hsp_midline>|||||||||||||||||||||||||||||||||||||||||||||||||||| ||||||||||||||| | |||  |  |  |   ||||||||||  |||||||||| | |||   ||||| ||  ||||||   ||||   |||||  | | |  ||||| ||| |||||||</Hsp_midline>
    </Hsp>
    <Hsp>
      <Hsp_num>2</Hsp_num>
      <Hsp_bit-score>119.407</Hsp_bit-score>
      <Hsp_score>131</Hsp_score>
      <Hsp_evalue>1.23272e-24</Hsp_evalue>
      <Hsp_query-from>1</Hsp_query-from>
      <Hsp_query-to>68</Hsp_query-to>
      <Hsp_hit-from>226413</Hsp_hit-from>
      <Hsp_hit-to>226480</Hsp_hit-to>
      <Hsp_query-frame>1</Hsp_query-frame>
      <Hsp_hit-frame>1</Hsp_hit-frame>
      <Hsp_identity>67</Hsp_identity>
      <Hsp_positive>67</Hsp_positive>
      <Hsp_gaps>0</Hsp_gaps>
      <Hsp_align-len>68</Hsp_align-len>
      <Hsp_qseq>ATCGCTTCTCGGCCTTTTGGCTAAGATCAAGTGTAGTATCTGTTCTTATCAGTTTAATATCTGATACG</Hsp_qseq>
      <Hsp_hseq>ATCGCTTCTCGGCCTTTTGGCTAAGATCAAGTGTAGTATCTGTTCTTATCAGCTTAATATCTGATACG</Hsp_hseq>
      <Hsp_midline>|||||||||||||||||||||||||||||||||||||||||||||||||||| |||||||||||||||</Hsp_midline>
    </Hsp>
    <Hsp>
      <Hsp_num>3</Hsp_num>
      <Hsp_bit-score>76.1261</Hsp_bit-score>
      <Hsp_score>83</Hsp_score>
      <Hsp_evalue>1.31734e-11</Hsp_evalue>
      <Hsp_query-from>38</Hsp_query-from>
      <Hsp_query-to>172</Hsp_query-to>
      <Hsp_hit-from>172323</Hsp_hit-from>
      <Hsp_hit-to>172188</Hsp_hit-to>
      <Hsp_query-frame>1</Hsp_query-frame>
      <Hsp_hit-frame>-1</Hsp_hit-frame>
      <Hsp_identity>99</Hsp_identity>
      <Hsp_positive>99</Hsp_positive>
      <Hsp_gaps>1</Hsp_gaps>
      <Hsp_align-len>136</Hsp_align-len>
      <Hsp_qseq>ATCTGTTCTTATCAGTTTAATATCTGATACG-TCCTCTATCCGAGGACAATATATTAAATGGATTTTTGGAGCAGGGAGATGGAATAGGAGCTTGCTCTGTCCACTCCACGCATCGACCTGGTATTGCAGTACCTC</Hsp_qseq>
      <Hsp_hseq>ATCTGTTCTTATCAGCTTAATATCTGATACGCTGCTCATTGAGCAGCTCATATATTAAACTGATTTTTGGAACCAGGCTGTGGAAAAGAGGCTTGCCTCGTCCCAGCCACGGGTTGCCTCGGTATAGCACTACCTC</Hsp_hseq>
      <Hsp_midline>||||||||||||||| ||||||||||||||| | |||  |  |  |   ||||||||||  |||||||||| |  ||   ||||| ||  ||||||   ||||   |||||  | | |  ||||| ||| ||||||</Hsp_midline>
    </Hsp>
    <Hsp>
      <Hsp_num>4</Hsp_num>
      <Hsp_bit-score>72.5194</Hsp_bit-score>
      <Hsp_score>79</Hsp_score>
      <Hsp_evalue>1.60485e-10</Hsp_evalue>
      <Hsp_query-from>38</Hsp_query-from>
      <Hsp_query-to>180</Hsp_query-to>
      <Hsp_hit-from>224586</Hsp_hit-from>
      <Hsp_hit-to>224728</Hsp_hit-to>
      <Hsp_query-frame>1</Hsp_query-frame>
      <Hsp_hit-frame>1</Hsp_hit-frame>
      <Hsp_identity>105</Hsp_identity>
      <Hsp_positive>105</Hsp_positive>
      <Hsp_gaps>4</Hsp_gaps>
      <Hsp_align-len>145</Hsp_align-len>
      <Hsp_qseq>ATCTGTTCTTATCAGTTTAATATCTGATACG-TCCTCTATCCGAGGACAATATATTAAATGGATTTTTGGAGCAGGGAGATGG-AATAGGAGCTTGCTCTGTCCACTCCACGCATCGACCTGGTATTGCAGTACCTCCAGGACCG</Hsp_qseq>
      <Hsp_hseq>ATCTGTTCTTATCAGCTTAATATCTGATACGCTGTTCATTGAGCAGCTCATATATTAAACTGATTTTTGGAACCGGGCTGTGGCAAAAGAGGCTTGCCTCGTCCCAGCCACGGGTTGCCTCGGTATAGCACTACCTCC--GACCG</Hsp_hseq>
      <Hsp_midline>||||||||||||||| ||||||||||||||| |  ||  |  |  |   ||||||||||  |||||||||| | |||   ||| || ||  ||||||   ||||   |||||  | | |  ||||| ||| |||||||  |||||</Hsp_midline>
    </Hsp>
    <Hsp>
      <Hsp_num>5</Hsp_num>
      <Hsp_bit-score>62.6008</Hsp_bit-score>
      <Hsp_score>68</Hsp_score>
      <Hsp_evalue>8.31334e-08</Hsp_evalue>
      <Hsp_query-from>1</Hsp_query-from>
      <Hsp_query-to>34</Hsp_query-to>
      <Hsp_hit-from>204118</Hsp_hit-from>
      <Hsp_hit-to>204085</Hsp_hit-to>
      <Hsp_query-frame>1</Hsp_query-frame>
      <Hsp_hit-frame>-1</Hsp_hit-frame>
      <Hsp_identity>34</Hsp_identity>
      <Hsp_positive>34</Hsp_positive>
      <Hsp_gaps>0</Hsp_gaps>
      <Hsp_align-len>34</Hsp_align-len>
      <Hsp_qseq>ATCGCTTCTCGGCCTTTTGGCTAAGATCAAGTGT</Hsp_qseq>
      <Hsp_hseq>ATCGCTTCTCGGCCTTTTGGCTAAGATCAAGTGT</Hsp_hseq>
      <Hsp_midline>||||||||||||||||||||||||||||||||||</Hsp_midline>
    </Hsp>
    <Hsp>
      <Hsp_num>6</Hsp_num>
      <Hsp_bit-score>41.8621</Hsp_bit-score>
      <Hsp_score>45</Hsp_score>
      <Hsp_evalue>0.271765</Hsp_evalue>
      <Hsp_query-from>1</Hsp_query-from>
      <Hsp_query-to>25</Hsp_query-to>
      <Hsp_hit-from>182313</Hsp_hit-from>
      <Hsp_hit-to>182289</Hsp_hit-to>
      <Hsp_query-frame>1</Hsp_query-frame>
      <Hsp_hit-frame>-1</Hsp_hit-frame>
      <Hsp_identity>24</Hsp_identity>
      <Hsp_positive>24</Hsp_positive>
      <Hsp_gaps>0</Hsp_gaps>
      <Hsp_align-len>25</Hsp_align-len>
      <Hsp_qseq>ATCGCTTCTCGGCCTTTTGGCTAAG</Hsp_qseq>
      <Hsp_hseq>ATCGCTTCTCGGCCTTTTGGCCAAG</Hsp_hseq>
      <Hsp_midline>||||||||||||||||||||| |||</Hsp_midline>
    </Hsp>
    <Hsp>
      <Hsp_num>7</Hsp_num>
      <Hsp_bit-score>38.2554</Hsp_bit-score>
      <Hsp_score>41</Hsp_score>
      <Hsp_evalue>3.31077</Hsp_evalue>
      <Hsp_query-from>6</Hsp_query-from>
      <Hsp_query-to>34</Hsp_query-to>
      <Hsp_hit-from>222981</Hsp_hit-from>
      <Hsp_hit-to>223010</Hsp_hit-to>
      <Hsp_query-frame>1</Hsp_query-frame>
      <Hsp_hit-frame>1</Hsp_hit-frame>
      <Hsp_identity>27</Hsp_identity>
      <Hsp_positive>27</Hsp_positive>
      <Hsp_gaps>1</Hsp_gaps>
      <Hsp_align-len>30</Hsp_align-len>
      <Hsp_qseq>TTCTCGGCCTTTTGGCTAAGAT-CAAGTGT</Hsp_qseq>
      <Hsp_hseq>TTCTCGGCCTTTTGGCTAAGTTGCAATTGT</Hsp_hseq>
      <Hsp_midline>|||||||||||||||||||| | ||| |||</Hsp_midline>
    </Hsp>
  </Hit_hsps>
</Hit>
<Hit>
  <Hit_num>9</Hit_num>
  <Hit_id>gi|1004128382|ref|NW_015441189.1|</Hit_id>
  <Hit_def>Acropora digitifera unplaced genomic scaffold, Adig_1.1 DF970824.1</Hit_def>
  <Hit_accession>NW_015441189</Hit_accession>
  <Hit_len>743942</Hit_len>
  <Hit_hsps>
    <Hsp>
      <Hsp_num>1</Hsp_num>
      <Hsp_bit-score>149.163</Hsp_bit-score>
      <Hsp_score>164</Hsp_score>
      <Hsp_evalue>7.27959e-34</Hsp_evalue>
      <Hsp_query-from>1</Hsp_query-from>
      <Hsp_query-to>173</Hsp_query-to>
      <Hsp_hit-from>20729</Hsp_hit-from>
      <Hsp_hit-to>20556</Hsp_hit-to>
      <Hsp_query-frame>1</Hsp_query-frame>
      <Hsp_hit-frame>-1</Hsp_hit-frame>
      <Hsp_identity>138</Hsp_identity>
      <Hsp_positive>138</Hsp_positive>
      <Hsp_gaps>1</Hsp_gaps>
      <Hsp_align-len>174</Hsp_align-len>
      <Hsp_qseq>ATCGCTTCTCGGCCTTTTGGCTAAGATCAAGTGTAGTATCTGTTCTTATCAGTTTAATATCTGATACG-TCCTCTATCCGAGGACAATATATTAAATGGATTTTTGGAGCAGGGAGATGGAATAGGAGCTTGCTCTGTCCACTCCACGCATCGACCTGGTATTGCAGTACCTCC</Hsp_qseq>
      <Hsp_hseq>ATCGCTTCTCGGCCTTTTGGCTAAGATCAAGTGTAGTATCTGTTCTTATCAGCTTAATATCTGATACGCTGCTCATTGAGCAGCTCATATATTAAACTGATTTTTGGAACCGGGCTGTGGAAAAGAGGCTTGCCTCGTCCCAGCCACGGGTTGCCTCGGTATAGCACTACCTCC</Hsp_hseq>
      <Hsp_midline>|||||||||||||||||||||||||||||||||||||||||||||||||||| ||||||||||||||| | |||  |  |  |   ||||||||||  |||||||||| | |||   ||||| ||  ||||||   ||||   |||||  | | |  ||||| ||| |||||||</Hsp_midline>
    </Hsp>
    <Hsp>
      <Hsp_num>2</Hsp_num>
      <Hsp_bit-score>149.163</Hsp_bit-score>
      <Hsp_score>164</Hsp_score>
      <Hsp_evalue>7.27959e-34</Hsp_evalue>
      <Hsp_query-from>1</Hsp_query-from>
      <Hsp_query-to>173</Hsp_query-to>
      <Hsp_hit-from>68374</Hsp_hit-from>
      <Hsp_hit-to>68201</Hsp_hit-to>
      <Hsp_query-frame>1</Hsp_query-frame>
      <Hsp_hit-frame>-1</Hsp_hit-frame>
      <Hsp_identity>138</Hsp_identity>
      <Hsp_positive>138</Hsp_positive>
      <Hsp_gaps>1</Hsp_gaps>
      <Hsp_align-len>174</Hsp_align-len>
      <Hsp_qseq>ATCGCTTCTCGGCCTTTTGGCTAAGATCAAGTGTAGTATCTGTTCTTATCAGTTTAATATCTGATACG-TCCTCTATCCGAGGACAATATATTAAATGGATTTTTGGAGCAGGGAGATGGAATAGGAGCTTGCTCTGTCCACTCCACGCATCGACCTGGTATTGCAGTACCTCC</Hsp_qseq>
      <Hsp_hseq>ATCGCTTCTCGGCCTTTTGGCTAAGATCAAGTGTAGTATCTGTTCTTATCAGCTTAATATCTGATACGCTGCTCATTGAGCAGCTCATATATTAAACTGATTTTTGGAACCGGGCTGTGGAAAAGAGGCTTGCCTCGTCCCAGCCACGGGTTGCCTCGGTATAGCACTACCTCC</Hsp_hseq>
      <Hsp_midline>|||||||||||||||||||||||||||||||||||||||||||||||||||| ||||||||||||||| | |||  |  |  |   ||||||||||  |||||||||| | |||   ||||| ||  ||||||   ||||   |||||  | | |  ||||| ||| |||||||</Hsp_midline>
    </Hsp>
    <Hsp>
      <Hsp_num>3</Hsp_num>
      <Hsp_bit-score>147.359</Hsp_bit-score>
      <Hsp_score>162</Hsp_score>
      <Hsp_evalue>2.54083e-33</Hsp_evalue>
      <Hsp_query-from>1</Hsp_query-from>
      <Hsp_query-to>172</Hsp_query-to>
      <Hsp_hit-from>18925</Hsp_hit-from>
      <Hsp_hit-to>18753</Hsp_hit-to>
      <Hsp_query-frame>1</Hsp_query-frame>
      <Hsp_hit-frame>-1</Hsp_hit-frame>
      <Hsp_identity>137</Hsp_identity>
      <Hsp_positive>137</Hsp_positive>
      <Hsp_gaps>1</Hsp_gaps>
      <Hsp_align-len>173</Hsp_align-len>
      <Hsp_qseq>ATCGCTTCTCGGCCTTTTGGCTAAGATCAAGTGTAGTATCTGTTCTTATCAGTTTAATATCTGATACG-TCCTCTATCCGAGGACAATATATTAAATGGATTTTTGGAGCAGGGAGATGGAATAGGAGCTTGCTCTGTCCACTCCACGCATCGACCTGGTATTGCAGTACCTC</Hsp_qseq>
      <Hsp_hseq>ATCGCTTCTCGGCCTTTTGGCTAAGATCAAGTGTAGTATCTGTTCTTATCAGCTTAATATCTGATACGCTGCTCATTGAGCAGCTCATATATTAAACTGATTTTTGGAACCGGGCTGTGGAAAAGAGGCTTGCCTCGTCCCAGCCACGGGTTGCCTCGGTATAGCACTACCTC</Hsp_hseq>
      <Hsp_midline>|||||||||||||||||||||||||||||||||||||||||||||||||||| ||||||||||||||| | |||  |  |  |   ||||||||||  |||||||||| | |||   ||||| ||  ||||||   ||||   |||||  | | |  ||||| ||| ||||||</Hsp_midline>
    </Hsp>
    <Hsp>
      <Hsp_num>4</Hsp_num>
      <Hsp_bit-score>73.4211</Hsp_bit-score>
      <Hsp_score>80</Hsp_score>
      <Hsp_evalue>4.59798e-11</Hsp_evalue>
      <Hsp_query-from>38</Hsp_query-from>
      <Hsp_query-to>173</Hsp_query-to>
      <Hsp_hit-from>73719</Hsp_hit-from>
      <Hsp_hit-to>73583</Hsp_hit-to>
      <Hsp_query-frame>1</Hsp_query-frame>
      <Hsp_hit-frame>-1</Hsp_hit-frame>
      <Hsp_identity>99</Hsp_identity>
      <Hsp_positive>99</Hsp_positive>
      <Hsp_gaps>1</Hsp_gaps>
      <Hsp_align-len>137</Hsp_align-len>
      <Hsp_qseq>ATCTGTTCTTATCAGTTTAATATCTGATACG-TCCTCTATCCGAGGACAATATATTAAATGGATTTTTGGAGCAGGGAGATGGAATAGGAGCTTGCTCTGTCCACTCCACGCATCGACCTGGTATTGCAGTACCTCC</Hsp_qseq>
      <Hsp_hseq>ATCAGTTCTTATCAGCTTAATATCTGATACGCTGCTCATTGAGCAGCTCATATATTGAACTGATTTTTGGAACCGGGCTGTGGAAAAGAGGCTTGCCTCGTCCCAGCCACGGGTTGCCTCGGTATAGCACTACCTCC</Hsp_hseq>
      <Hsp_midline>||| ||||||||||| ||||||||||||||| | |||  |  |  |   ||||||| ||  |||||||||| | |||   ||||| ||  ||||||   ||||   |||||  | | |  ||||| ||| |||||||</Hsp_midline>
    </Hsp>
    <Hsp>
      <Hsp_num>5</Hsp_num>
      <Hsp_bit-score>41.8621</Hsp_bit-score>
      <Hsp_score>45</Hsp_score>
      <Hsp_evalue>0.271765</Hsp_evalue>
      <Hsp_query-from>1</Hsp_query-from>
      <Hsp_query-to>25</Hsp_query-to>
      <Hsp_hit-from>67133</Hsp_hit-from>
      <Hsp_hit-to>67109</Hsp_hit-to>
      <Hsp_query-frame>1</Hsp_query-frame>
      <Hsp_hit-frame>-1</Hsp_hit-frame>
      <Hsp_identity>24</Hsp_identity>
      <Hsp_positive>24</Hsp_positive>
      <Hsp_gaps>0</Hsp_gaps>
      <Hsp_align-len>25</Hsp_align-len>
      <Hsp_qseq>ATCGCTTCTCGGCCTTTTGGCTAAG</Hsp_qseq>
      <Hsp_hseq>ATCGCTTCTCGGCCTTTTGACTAAG</Hsp_hseq>
      <Hsp_midline>||||||||||||||||||| |||||</Hsp_midline>
    </Hsp>
    <Hsp>
      <Hsp_num>6</Hsp_num>
      <Hsp_bit-score>40.9604</Hsp_bit-score>
      <Hsp_score>44</Hsp_score>
      <Hsp_evalue>0.271765</Hsp_evalue>
      <Hsp_query-from>1</Hsp_query-from>
      <Hsp_query-to>22</Hsp_query-to>
      <Hsp_hit-from>78458</Hsp_hit-from>
      <Hsp_hit-to>78437</Hsp_hit-to>
      <Hsp_query-frame>1</Hsp_query-frame>
      <Hsp_hit-frame>-1</Hsp_hit-frame>
      <Hsp_identity>22</Hsp_identity>
      <Hsp_positive>22</Hsp_positive>
      <Hsp_gaps>0</Hsp_gaps>
      <Hsp_align-len>22</Hsp_align-len>
      <Hsp_qseq>ATCGCTTCTCGGCCTTTTGGCT</Hsp_qseq>
      <Hsp_hseq>ATCGCTTCTCGGCCTTTTGGCT</Hsp_hseq>
      <Hsp_midline>||||||||||||||||||||||</Hsp_midline>
    </Hsp>
    <Hsp>
      <Hsp_num>7</Hsp_num>
      <Hsp_bit-score>40.0587</Hsp_bit-score>
      <Hsp_score>43</Hsp_score>
      <Hsp_evalue>0.948552</Hsp_evalue>
      <Hsp_query-from>1</Hsp_query-from>
      <Hsp_query-to>24</Hsp_query-to>
      <Hsp_hit-from>15159</Hsp_hit-from>
      <Hsp_hit-to>15136</Hsp_hit-to>
      <Hsp_query-frame>1</Hsp_query-frame>
      <Hsp_hit-frame>-1</Hsp_hit-frame>
      <Hsp_identity>23</Hsp_identity>
      <Hsp_positive>23</Hsp_positive>
      <Hsp_gaps>0</Hsp_gaps>
      <Hsp_align-len>24</Hsp_align-len>
      <Hsp_qseq>ATCGCTTCTCGGCCTTTTGGCTAA</Hsp_qseq>
      <Hsp_hseq>ATCGCTTCTTGGCCTTTTGGCTAA</Hsp_hseq>
      <Hsp_midline>||||||||| ||||||||||||||</Hsp_midline>
    </Hsp>
    <Hsp>
      <Hsp_num>8</Hsp_num>
      <Hsp_bit-score>37.3537</Hsp_bit-score>
      <Hsp_score>40</Hsp_score>
      <Hsp_evalue>3.31077</Hsp_evalue>
      <Hsp_query-from>4</Hsp_query-from>
      <Hsp_query-to>28</Hsp_query-to>
      <Hsp_hit-from>49781</Hsp_hit-from>
      <Hsp_hit-to>49757</Hsp_hit-to>
      <Hsp_query-frame>1</Hsp_query-frame>
      <Hsp_hit-frame>-1</Hsp_hit-frame>
      <Hsp_identity>23</Hsp_identity>
      <Hsp_positive>23</Hsp_positive>
      <Hsp_gaps>0</Hsp_gaps>
      <Hsp_align-len>25</Hsp_align-len>
      <Hsp_qseq>GCTTCTCGGCCTTTTGGCTAAGATC</Hsp_qseq>
      <Hsp_hseq>GCTTCTCGGCCTTTTGACTAAGGTC</Hsp_hseq>
      <Hsp_midline>|||||||||||||||| ||||| ||</Hsp_midline>
    </Hsp>
  </Hit_hsps>
</Hit>
<Hit>
  <Hit_num>10</Hit_num>
  <Hit_id>gi|1004128330|ref|NW_015441241.1|</Hit_id>
  <Hit_def>Acropora digitifera unplaced genomic scaffold, Adig_1.1 DF970876.1</Hit_def>
  <Hit_accession>NW_015441241</Hit_accession>
  <Hit_len>604412</Hit_len>
  <Hit_hsps>
    <Hsp>
      <Hsp_num>1</Hsp_num>
      <Hsp_bit-score>149.163</Hsp_bit-score>
      <Hsp_score>164</Hsp_score>
      <Hsp_evalue>7.27959e-34</Hsp_evalue>
      <Hsp_query-from>1</Hsp_query-from>
      <Hsp_query-to>173</Hsp_query-to>
      <Hsp_hit-from>198650</Hsp_hit-from>
      <Hsp_hit-to>198823</Hsp_hit-to>
      <Hsp_query-frame>1</Hsp_query-frame>
      <Hsp_hit-frame>1</Hsp_hit-frame>
      <Hsp_identity>138</Hsp_identity>
      <Hsp_positive>138</Hsp_positive>
      <Hsp_gaps>1</Hsp_gaps>
      <Hsp_align-len>174</Hsp_align-len>
      <Hsp_qseq>ATCGCTTCTCGGCCTTTTGGCTAAGATCAAGTGTAGTATCTGTTCTTATCAGTTTAATATCTGATACG-TCCTCTATCCGAGGACAATATATTAAATGGATTTTTGGAGCAGGGAGATGGAATAGGAGCTTGCTCTGTCCACTCCACGCATCGACCTGGTATTGCAGTACCTCC</Hsp_qseq>
      <Hsp_hseq>ATCGCTTCTCGGCCTTTTGGCTAAGATCAAGTGTAGTATCTGTTCTTATCAGCTTAATATCTGATACGCTGCTCATTGAGCAGCTCATATATTAAACTGATTTTTGGAACCGGGCTGTGGAAAAGAGGCTTGCCTCGTCCCAGCCACGGGTTGCCTCGGTATAGCACTACCTCC</Hsp_hseq>
      <Hsp_midline>|||||||||||||||||||||||||||||||||||||||||||||||||||| ||||||||||||||| | |||  |  |  |   ||||||||||  |||||||||| | |||   ||||| ||  ||||||   ||||   |||||  | | |  ||||| ||| |||||||</Hsp_midline>
    </Hsp>
    <Hsp>
      <Hsp_num>2</Hsp_num>
      <Hsp_bit-score>41.8621</Hsp_bit-score>
      <Hsp_score>45</Hsp_score>
      <Hsp_evalue>0.271765</Hsp_evalue>
      <Hsp_query-from>1</Hsp_query-from>
      <Hsp_query-to>25</Hsp_query-to>
      <Hsp_hit-from>200454</Hsp_hit-from>
      <Hsp_hit-to>200478</Hsp_hit-to>
      <Hsp_query-frame>1</Hsp_query-frame>
      <Hsp_hit-frame>1</Hsp_hit-frame>
      <Hsp_identity>24</Hsp_identity>
      <Hsp_positive>24</Hsp_positive>
      <Hsp_gaps>0</Hsp_gaps>
      <Hsp_align-len>25</Hsp_align-len>
      <Hsp_qseq>ATCGCTTCTCGGCCTTTTGGCTAAG</Hsp_qseq>
      <Hsp_hseq>ATCGCTTCTCGGTCTTTTGGCTAAG</Hsp_hseq>
      <Hsp_midline>|||||||||||| ||||||||||||</Hsp_midline>
    </Hsp>
  </Hit_hsps>
</Hit>
<Hit>
  <Hit_num>11</Hit_num>
  <Hit_id>gi|1004128326|ref|NW_015441245.1|</Hit_id>
  <Hit_def>Acropora digitifera unplaced genomic scaffold, Adig_1.1 DF970880.1</Hit_def>
  <Hit_accession>NW_015441245</Hit_accession>
  <Hit_len>602186</Hit_len>
  <Hit_hsps>
    <Hsp>
      <Hsp_num>1</Hsp_num>
      <Hsp_bit-score>149.163</Hsp_bit-score>
      <Hsp_score>164</Hsp_score>
      <Hsp_evalue>7.27959e-34</Hsp_evalue>
      <Hsp_query-from>1</Hsp_query-from>
      <Hsp_query-to>173</Hsp_query-to>
      <Hsp_hit-from>528036</Hsp_hit-from>
      <Hsp_hit-to>528209</Hsp_hit-to>
      <Hsp_query-frame>1</Hsp_query-frame>
      <Hsp_hit-frame>1</Hsp_hit-frame>
      <Hsp_identity>138</Hsp_identity>
      <Hsp_positive>138</Hsp_positive>
      <Hsp_gaps>1</Hsp_gaps>
      <Hsp_align-len>174</Hsp_align-len>
      <Hsp_qseq>ATCGCTTCTCGGCCTTTTGGCTAAGATCAAGTGTAGTATCTGTTCTTATCAGTTTAATATCTGATACG-TCCTCTATCCGAGGACAATATATTAAATGGATTTTTGGAGCAGGGAGATGGAATAGGAGCTTGCTCTGTCCACTCCACGCATCGACCTGGTATTGCAGTACCTCC</Hsp_qseq>
      <Hsp_hseq>ATCGCTTCTCGGCCTTTTGGCTAAGATCAAGTGTAGTATCTGTTCTTATCAGCTTAATATCTGATACGCTGCTCATTGAGCAGCTCATATATTAAACTGATTTTTGGAACCGGGCTGTGGAAAAGAGGCTTGCCTCGTCCCAGCCACGGGTTGCCTCGGTATAGCACTACCTCC</Hsp_hseq>
      <Hsp_midline>|||||||||||||||||||||||||||||||||||||||||||||||||||| ||||||||||||||| | |||  |  |  |   ||||||||||  |||||||||| | |||   ||||| ||  ||||||   ||||   |||||  | | |  ||||| ||| |||||||</Hsp_midline>
    </Hsp>
    <Hsp>
      <Hsp_num>2</Hsp_num>
      <Hsp_bit-score>89.6514</Hsp_bit-score>
      <Hsp_score>98</Hsp_score>
      <Hsp_evalue>5.98073e-16</Hsp_evalue>
      <Hsp_query-from>1</Hsp_query-from>
      <Hsp_query-to>49</Hsp_query-to>
      <Hsp_hit-from>489386</Hsp_hit-from>
      <Hsp_hit-to>489434</Hsp_hit-to>
      <Hsp_query-frame>1</Hsp_query-frame>
      <Hsp_hit-frame>1</Hsp_hit-frame>
      <Hsp_identity>49</Hsp_identity>
      <Hsp_positive>49</Hsp_positive>
      <Hsp_gaps>0</Hsp_gaps>
      <Hsp_align-len>49</Hsp_align-len>
      <Hsp_qseq>ATCGCTTCTCGGCCTTTTGGCTAAGATCAAGTGTAGTATCTGTTCTTAT</Hsp_qseq>
      <Hsp_hseq>ATCGCTTCTCGGCCTTTTGGCTAAGATCAAGTGTAGTATCTGTTCTTAT</Hsp_hseq>
      <Hsp_midline>|||||||||||||||||||||||||||||||||||||||||||||||||</Hsp_midline>
    </Hsp>
    <Hsp>
      <Hsp_num>3</Hsp_num>
      <Hsp_bit-score>53.584</Hsp_bit-score>
      <Hsp_score>58</Hsp_score>
      <Hsp_evalue>4.30642e-05</Hsp_evalue>
      <Hsp_query-from>1</Hsp_query-from>
      <Hsp_query-to>34</Hsp_query-to>
      <Hsp_hit-from>479680</Hsp_hit-from>
      <Hsp_hit-to>479713</Hsp_hit-to>
      <Hsp_query-frame>1</Hsp_query-frame>
      <Hsp_hit-frame>1</Hsp_hit-frame>
      <Hsp_identity>32</Hsp_identity>
      <Hsp_positive>32</Hsp_positive>
      <Hsp_gaps>0</Hsp_gaps>
      <Hsp_align-len>34</Hsp_align-len>
      <Hsp_qseq>ATCGCTTCTCGGCCTTTTGGCTAAGATCAAGTGT</Hsp_qseq>
      <Hsp_hseq>ATCGCTTCTCGGCGTTTTGGCTAAGATCCAGTGT</Hsp_hseq>
      <Hsp_midline>||||||||||||| |||||||||||||| |||||</Hsp_midline>
    </Hsp>
    <Hsp>
      <Hsp_num>4</Hsp_num>
      <Hsp_bit-score>51.7806</Hsp_bit-score>
      <Hsp_score>56</Hsp_score>
      <Hsp_evalue>0.000150309</Hsp_evalue>
      <Hsp_query-from>1</Hsp_query-from>
      <Hsp_query-to>28</Hsp_query-to>
      <Hsp_hit-from>529722</Hsp_hit-from>
      <Hsp_hit-to>529749</Hsp_hit-to>
      <Hsp_query-frame>1</Hsp_query-frame>
      <Hsp_hit-frame>1</Hsp_hit-frame>
      <Hsp_identity>28</Hsp_identity>
      <Hsp_positive>28</Hsp_positive>
      <Hsp_gaps>0</Hsp_gaps>
      <Hsp_align-len>28</Hsp_align-len>
      <Hsp_qseq>ATCGCTTCTCGGCCTTTTGGCTAAGATC</Hsp_qseq>
      <Hsp_hseq>ATCGCTTCTCGGCCTTTTGGCTAAGATC</Hsp_hseq>
      <Hsp_midline>||||||||||||||||||||||||||||</Hsp_midline>
    </Hsp>
    <Hsp>
      <Hsp_num>5</Hsp_num>
      <Hsp_bit-score>49.0756</Hsp_bit-score>
      <Hsp_score>53</Hsp_score>
      <Hsp_evalue>0.00183114</Hsp_evalue>
      <Hsp_query-from>38</Hsp_query-from>
      <Hsp_query-to>132</Hsp_query-to>
      <Hsp_hit-from>542211</Hsp_hit-from>
      <Hsp_hit-to>542116</Hsp_hit-to>
      <Hsp_query-frame>1</Hsp_query-frame>
      <Hsp_hit-frame>-1</Hsp_hit-frame>
      <Hsp_identity>69</Hsp_identity>
      <Hsp_positive>69</Hsp_positive>
      <Hsp_gaps>1</Hsp_gaps>
      <Hsp_align-len>96</Hsp_align-len>
      <Hsp_qseq>ATCTGTTCTTATCAGTTTAATATCTGATACG-TCCTCTATCCGAGGACAATATATTAAATGGATTTTTGGAGCAGGGAGATGGAATAGGAGCTTGC</Hsp_qseq>
      <Hsp_hseq>ATATGTTCTTATCAGCTTAGTATCTAATACGCTGCTCATTGAGTGGCTCATAAAATAAACTGATTTTTGGATCCGGCCTGTGGAAAAGAGGCTTGC</Hsp_hseq>
      <Hsp_midline>|| |||||||||||| ||| ||||| ||||| | |||  |  | ||   ||| | ||||  |||||||||| | ||    ||||| ||  ||||||</Hsp_midline>
    </Hsp>
  </Hit_hsps>
</Hit>
<Hit>
  <Hit_num>12</Hit_num>
  <Hit_id>gi|1004128320|ref|NW_015441251.1|</Hit_id>
  <Hit_def>Acropora digitifera unplaced genomic scaffold, Adig_1.1 DF970886.1</Hit_def>
  <Hit_accession>NW_015441251</Hit_accession>
  <Hit_len>580963</Hit_len>
  <Hit_hsps>
    <Hsp>
      <Hsp_num>1</Hsp_num>
      <Hsp_bit-score>149.163</Hsp_bit-score>
      <Hsp_score>164</Hsp_score>
      <Hsp_evalue>7.27959e-34</Hsp_evalue>
      <Hsp_query-from>1</Hsp_query-from>
      <Hsp_query-to>173</Hsp_query-to>
      <Hsp_hit-from>212995</Hsp_hit-from>
      <Hsp_hit-to>212822</Hsp_hit-to>
      <Hsp_query-frame>1</Hsp_query-frame>
      <Hsp_hit-frame>-1</Hsp_hit-frame>
      <Hsp_identity>138</Hsp_identity>
      <Hsp_positive>138</Hsp_positive>
      <Hsp_gaps>1</Hsp_gaps>
      <Hsp_align-len>174</Hsp_align-len>
      <Hsp_qseq>ATCGCTTCTCGGCCTTTTGGCTAAGATCAAGTGTAGTATCTGTTCTTATCAGTTTAATATCTGATACG-TCCTCTATCCGAGGACAATATATTAAATGGATTTTTGGAGCAGGGAGATGGAATAGGAGCTTGCTCTGTCCACTCCACGCATCGACCTGGTATTGCAGTACCTCC</Hsp_qseq>
      <Hsp_hseq>ATCGCTTCTCGGCCTTTTGGCTAAGATCAAGTGTAGTATCTGTTCTTATCAGCTTAATATCTGATACGCTGCTCATTGAGCAGCTCATATATTAAACTGATTTTTGGAACCGGGCTGTGGAAAAGAGGCTTGCCTCGTCCCAGCCACGGGTTGCCTCGGTATAGCACTACCTCC</Hsp_hseq>
      <Hsp_midline>|||||||||||||||||||||||||||||||||||||||||||||||||||| ||||||||||||||| | |||  |  |  |   ||||||||||  |||||||||| | |||   ||||| ||  ||||||   ||||   |||||  | | |  ||||| ||| |||||||</Hsp_midline>
    </Hsp>
    <Hsp>
      <Hsp_num>2</Hsp_num>
      <Hsp_bit-score>149.163</Hsp_bit-score>
      <Hsp_score>164</Hsp_score>
      <Hsp_evalue>7.27959e-34</Hsp_evalue>
      <Hsp_query-from>1</Hsp_query-from>
      <Hsp_query-to>173</Hsp_query-to>
      <Hsp_hit-from>332752</Hsp_hit-from>
      <Hsp_hit-to>332579</Hsp_hit-to>
      <Hsp_query-frame>1</Hsp_query-frame>
      <Hsp_hit-frame>-1</Hsp_hit-frame>
      <Hsp_identity>138</Hsp_identity>
      <Hsp_positive>138</Hsp_positive>
      <Hsp_gaps>1</Hsp_gaps>
      <Hsp_align-len>174</Hsp_align-len>
      <Hsp_qseq>ATCGCTTCTCGGCCTTTTGGCTAAGATCAAGTGTAGTATCTGTTCTTATCAGTTTAATATCTGATACG-TCCTCTATCCGAGGACAATATATTAAATGGATTTTTGGAGCAGGGAGATGGAATAGGAGCTTGCTCTGTCCACTCCACGCATCGACCTGGTATTGCAGTACCTCC</Hsp_qseq>
      <Hsp_hseq>ATCGCTTCTCGGCCTTTTGGCTAAGATCAAGTGTAGTATCTGTTCTTATCAGCTTAATATCTGATACGCTGCTCATTGAGCAGCTCATATATTAAACTGATTTTTGGAACCGGGCTGTGGAAAAGAGGCTTGCCTCGTCCCAGCCACGGGTTGCCTCGGTATAGCACTACCTCC</Hsp_hseq>
      <Hsp_midline>|||||||||||||||||||||||||||||||||||||||||||||||||||| ||||||||||||||| | |||  |  |  |   ||||||||||  |||||||||| | |||   ||||| ||  ||||||   ||||   |||||  | | |  ||||| ||| |||||||</Hsp_midline>
    </Hsp>
    <Hsp>
      <Hsp_num>3</Hsp_num>
      <Hsp_bit-score>149.163</Hsp_bit-score>
      <Hsp_score>164</Hsp_score>
      <Hsp_evalue>7.27959e-34</Hsp_evalue>
      <Hsp_query-from>1</Hsp_query-from>
      <Hsp_query-to>173</Hsp_query-to>
      <Hsp_hit-from>343240</Hsp_hit-from>
      <Hsp_hit-to>343067</Hsp_hit-to>
      <Hsp_query-frame>1</Hsp_query-frame>
      <Hsp_hit-frame>-1</Hsp_hit-frame>
      <Hsp_identity>138</Hsp_identity>
      <Hsp_positive>138</Hsp_positive>
      <Hsp_gaps>1</Hsp_gaps>
      <Hsp_align-len>174</Hsp_align-len>
      <Hsp_qseq>ATCGCTTCTCGGCCTTTTGGCTAAGATCAAGTGTAGTATCTGTTCTTATCAGTTTAATATCTGATACG-TCCTCTATCCGAGGACAATATATTAAATGGATTTTTGGAGCAGGGAGATGGAATAGGAGCTTGCTCTGTCCACTCCACGCATCGACCTGGTATTGCAGTACCTCC</Hsp_qseq>
      <Hsp_hseq>ATCGCTTCTCGGCCTTTTGGCTAAGATCAAGTGTAGTATCTGTTCTTATCAGCTTAATATCTGATACGCTGCTCATTGAGCAGCTCATATATTAAACTGATTTTTGGAACCGGGCTGTGGAAAAGAGGCTTGCCTCGTCCCAGCCACGGGTTGCCTCGGTATAGCACTACCTCC</Hsp_hseq>
      <Hsp_midline>|||||||||||||||||||||||||||||||||||||||||||||||||||| ||||||||||||||| | |||  |  |  |   ||||||||||  |||||||||| | |||   ||||| ||  ||||||   ||||   |||||  | | |  ||||| ||| |||||||</Hsp_midline>
    </Hsp>
    <Hsp>
      <Hsp_num>4</Hsp_num>
      <Hsp_bit-score>149.163</Hsp_bit-score>
      <Hsp_score>164</Hsp_score>
      <Hsp_evalue>7.27959e-34</Hsp_evalue>
      <Hsp_query-from>1</Hsp_query-from>
      <Hsp_query-to>173</Hsp_query-to>
      <Hsp_hit-from>345052</Hsp_hit-from>
      <Hsp_hit-to>344879</Hsp_hit-to>
      <Hsp_query-frame>1</Hsp_query-frame>
      <Hsp_hit-frame>-1</Hsp_hit-frame>
      <Hsp_identity>138</Hsp_identity>
      <Hsp_positive>138</Hsp_positive>
      <Hsp_gaps>1</Hsp_gaps>
      <Hsp_align-len>174</Hsp_align-len>
      <Hsp_qseq>ATCGCTTCTCGGCCTTTTGGCTAAGATCAAGTGTAGTATCTGTTCTTATCAGTTTAATATCTGATACG-TCCTCTATCCGAGGACAATATATTAAATGGATTTTTGGAGCAGGGAGATGGAATAGGAGCTTGCTCTGTCCACTCCACGCATCGACCTGGTATTGCAGTACCTCC</Hsp_qseq>
      <Hsp_hseq>ATCGCTTCTCGGCCTTTTGGCTAAGATCAAGTGTAGTATCTGTTCTTATCAGCTTAATATCTGATACGCTGCTCATTGAGCAGCTCATATATTAAACTGATTTTTGGAACCGGGCTGTGGAAAAGAGGCTTGCCTCGTCCCAGCCACGGGTTGCCTCGGTATAGCACTACCTCC</Hsp_hseq>
      <Hsp_midline>|||||||||||||||||||||||||||||||||||||||||||||||||||| ||||||||||||||| | |||  |  |  |   ||||||||||  |||||||||| | |||   ||||| ||  ||||||   ||||   |||||  | | |  ||||| ||| |||||||</Hsp_midline>
    </Hsp>
    <Hsp>
      <Hsp_num>5</Hsp_num>
      <Hsp_bit-score>149.163</Hsp_bit-score>
      <Hsp_score>164</Hsp_score>
      <Hsp_evalue>7.27959e-34</Hsp_evalue>
      <Hsp_query-from>1</Hsp_query-from>
      <Hsp_query-to>173</Hsp_query-to>
      <Hsp_hit-from>364241</Hsp_hit-from>
      <Hsp_hit-to>364068</Hsp_hit-to>
      <Hsp_query-frame>1</Hsp_query-frame>
      <Hsp_hit-frame>-1</Hsp_hit-frame>
      <Hsp_identity>138</Hsp_identity>
      <Hsp_positive>138</Hsp_positive>
      <Hsp_gaps>1</Hsp_gaps>
      <Hsp_align-len>174</Hsp_align-len>
      <Hsp_qseq>ATCGCTTCTCGGCCTTTTGGCTAAGATCAAGTGTAGTATCTGTTCTTATCAGTTTAATATCTGATACG-TCCTCTATCCGAGGACAATATATTAAATGGATTTTTGGAGCAGGGAGATGGAATAGGAGCTTGCTCTGTCCACTCCACGCATCGACCTGGTATTGCAGTACCTCC</Hsp_qseq>
      <Hsp_hseq>ATCGCTTCTCGGCCTTTTGGCTAAGATCAAGTGTAGTATCTGTTCTTATCAGCTTAATATCTGATACGCTGCTCATTGAGCAGCTCATATATTAAACTGATTTTTGGAACCGGGCTGTGGAAAAGAGGCTTGCCTCGTCCCAGCCACGGGTTGCCTCGGTATAGCACTACCTCC</Hsp_hseq>
      <Hsp_midline>|||||||||||||||||||||||||||||||||||||||||||||||||||| ||||||||||||||| | |||  |  |  |   ||||||||||  |||||||||| | |||   ||||| ||  ||||||   ||||   |||||  | | |  ||||| ||| |||||||</Hsp_midline>
    </Hsp>
    <Hsp>
      <Hsp_num>6</Hsp_num>
      <Hsp_bit-score>149.163</Hsp_bit-score>
      <Hsp_score>164</Hsp_score>
      <Hsp_evalue>7.27959e-34</Hsp_evalue>
      <Hsp_query-from>1</Hsp_query-from>
      <Hsp_query-to>173</Hsp_query-to>
      <Hsp_hit-from>367794</Hsp_hit-from>
      <Hsp_hit-to>367621</Hsp_hit-to>
      <Hsp_query-frame>1</Hsp_query-frame>
      <Hsp_hit-frame>-1</Hsp_hit-frame>
      <Hsp_identity>138</Hsp_identity>
      <Hsp_positive>138</Hsp_positive>
      <Hsp_gaps>1</Hsp_gaps>
      <Hsp_align-len>174</Hsp_align-len>
      <Hsp_qseq>ATCGCTTCTCGGCCTTTTGGCTAAGATCAAGTGTAGTATCTGTTCTTATCAGTTTAATATCTGATACG-TCCTCTATCCGAGGACAATATATTAAATGGATTTTTGGAGCAGGGAGATGGAATAGGAGCTTGCTCTGTCCACTCCACGCATCGACCTGGTATTGCAGTACCTCC</Hsp_qseq>
      <Hsp_hseq>ATCGCTTCTCGGCCTTTTGGCTAAGATCAAGTGTAGTATCTGTTCTTATCAGCTTAATATCTGATACGCTGCTCATTGAGCAGCTCATATATTAAACTGATTTTTGGAACCGGGCTGTGGAAAAGAGGCTTGCCTCGTCCCAGCCACGGGTTGCCTCGGTATAGCACTACCTCC</Hsp_hseq>
      <Hsp_midline>|||||||||||||||||||||||||||||||||||||||||||||||||||| ||||||||||||||| | |||  |  |  |   ||||||||||  |||||||||| | |||   ||||| ||  ||||||   ||||   |||||  | | |  ||||| ||| |||||||</Hsp_midline>
    </Hsp>
    <Hsp>
      <Hsp_num>7</Hsp_num>
      <Hsp_bit-score>147.359</Hsp_bit-score>
      <Hsp_score>162</Hsp_score>
      <Hsp_evalue>2.54083e-33</Hsp_evalue>
      <Hsp_query-from>1</Hsp_query-from>
      <Hsp_query-to>172</Hsp_query-to>
      <Hsp_hit-from>275519</Hsp_hit-from>
      <Hsp_hit-to>275347</Hsp_hit-to>
      <Hsp_query-frame>1</Hsp_query-frame>
      <Hsp_hit-frame>-1</Hsp_hit-frame>
      <Hsp_identity>137</Hsp_identity>
      <Hsp_positive>137</Hsp_positive>
      <Hsp_gaps>1</Hsp_gaps>
      <Hsp_align-len>173</Hsp_align-len>
      <Hsp_qseq>ATCGCTTCTCGGCCTTTTGGCTAAGATCAAGTGTAGTATCTGTTCTTATCAGTTTAATATCTGATACG-TCCTCTATCCGAGGACAATATATTAAATGGATTTTTGGAGCAGGGAGATGGAATAGGAGCTTGCTCTGTCCACTCCACGCATCGACCTGGTATTGCAGTACCTC</Hsp_qseq>
      <Hsp_hseq>ATCGCTTCTCGGCCTTTTGGCTAAGATCAAGTGTAGTATCTGTTCTTATCAGCTTAATATCTGATACGCTGCTCATTGAGCAGCTCATATATTAAACTGATTTTTGGAACCGGGCTGTGGAAAAGAGGCTTGCCTCGTCCCAGCCACGGGTTGCCTCGGTATAGCACTACCTC</Hsp_hseq>
      <Hsp_midline>|||||||||||||||||||||||||||||||||||||||||||||||||||| ||||||||||||||| | |||  |  |  |   ||||||||||  |||||||||| | |||   ||||| ||  ||||||   ||||   |||||  | | |  ||||| ||| ||||||</Hsp_midline>
    </Hsp>
    <Hsp>
      <Hsp_num>8</Hsp_num>
      <Hsp_bit-score>82.4379</Hsp_bit-score>
      <Hsp_score>90</Hsp_score>
      <Hsp_evalue>8.87619e-14</Hsp_evalue>
      <Hsp_query-from>38</Hsp_query-from>
      <Hsp_query-to>173</Hsp_query-to>
      <Hsp_hit-from>369557</Hsp_hit-from>
      <Hsp_hit-to>369421</Hsp_hit-to>
      <Hsp_query-frame>1</Hsp_query-frame>
      <Hsp_hit-frame>-1</Hsp_hit-frame>
      <Hsp_identity>101</Hsp_identity>
      <Hsp_positive>101</Hsp_positive>
      <Hsp_gaps>1</Hsp_gaps>
      <Hsp_align-len>137</Hsp_align-len>
      <Hsp_qseq>ATCTGTTCTTATCAGTTTAATATCTGATACG-TCCTCTATCCGAGGACAATATATTAAATGGATTTTTGGAGCAGGGAGATGGAATAGGAGCTTGCTCTGTCCACTCCACGCATCGACCTGGTATTGCAGTACCTCC</Hsp_qseq>
      <Hsp_hseq>ATCTGTTCTTATCAGCTTAATATCTGATACGCTGCTCATTGAGCAGCTCATATATTAAACTGATTTTTGGAACCGGGCTGTGGAAAAGAGGCTTGCCTCGTCCCAGCCACGGGTTGCCTCGGTATAGCACTACCTCC</Hsp_hseq>
      <Hsp_midline>||||||||||||||| ||||||||||||||| | |||  |  |  |   ||||||||||  |||||||||| | |||   ||||| ||  ||||||   ||||   |||||  | | |  ||||| ||| |||||||</Hsp_midline>
    </Hsp>
    <Hsp>
      <Hsp_num>9</Hsp_num>
      <Hsp_bit-score>79.7328</Hsp_bit-score>
      <Hsp_score>87</Hsp_score>
      <Hsp_evalue>1.08134e-12</Hsp_evalue>
      <Hsp_query-from>38</Hsp_query-from>
      <Hsp_query-to>173</Hsp_query-to>
      <Hsp_hit-from>255537</Hsp_hit-from>
      <Hsp_hit-to>255401</Hsp_hit-to>
      <Hsp_query-frame>1</Hsp_query-frame>
      <Hsp_hit-frame>-1</Hsp_hit-frame>
      <Hsp_identity>103</Hsp_identity>
      <Hsp_positive>103</Hsp_positive>
      <Hsp_gaps>7</Hsp_gaps>
      <Hsp_align-len>140</Hsp_align-len>
      <Hsp_qseq>ATCTGTTCTTATCAGTTTAATATCTGATACG----TCCTCTATCCGAGGACAATATATTAAATGGATTTTTGGAGCAGGGAGATGGAATAGGAGCTTGCTCTGTCCACTCCACGCATCGACCTGGTATTGCAGTACCTCC</Hsp_qseq>
      <Hsp_hseq>ATCTGTTCTTATCAGCTTAATATCTGATATGGTTCTCATTGATC--AGCTC-ATATATTAAACTGATTTTTGGAACCGGGCTGTGGAAAAGAGGCTTGCCTTGTCCCAGCCACGGGTTGCCTCGGTATAGCACTACCTCC</Hsp_hseq>
      <Hsp_midline>||||||||||||||| ||||||||||||| |    || |  |||  ||  | ||||||||||  |||||||||| | |||   ||||| ||  ||||||  |||||   |||||  | | |  ||||| ||| |||||||</Hsp_midline>
    </Hsp>
    <Hsp>
      <Hsp_num>10</Hsp_num>
      <Hsp_bit-score>73.4211</Hsp_bit-score>
      <Hsp_score>80</Hsp_score>
      <Hsp_evalue>4.59798e-11</Hsp_evalue>
      <Hsp_query-from>38</Hsp_query-from>
      <Hsp_query-to>173</Hsp_query-to>
      <Hsp_hit-from>279007</Hsp_hit-from>
      <Hsp_hit-to>278871</Hsp_hit-to>
      <Hsp_query-frame>1</Hsp_query-frame>
      <Hsp_hit-frame>-1</Hsp_hit-frame>
      <Hsp_identity>99</Hsp_identity>
      <Hsp_positive>99</Hsp_positive>
      <Hsp_gaps>1</Hsp_gaps>
      <Hsp_align-len>137</Hsp_align-len>
      <Hsp_qseq>ATCTGTTCTTATCAGTTTAATATCTGATACG-TCCTCTATCCGAGGACAATATATTAAATGGATTTTTGGAGCAGGGAGATGGAATAGGAGCTTGCTCTGTCCACTCCACGCATCGACCTGGTATTGCAGTACCTCC</Hsp_qseq>
      <Hsp_hseq>ATCTTTTCTTATCAGCTTAATATCTGATACGCTACTCATTGAGCAGCTCATATATTAAACTGATTTTTGGAACCGGGCTGTGGAAAAGAGGCTTGCCTCATCCCAGCCACGGGTTGCCTCGGTATAGCACTACCTCC</Hsp_hseq>
      <Hsp_midline>|||| |||||||||| ||||||||||||||| | |||  |  |  |   ||||||||||  |||||||||| | |||   ||||| ||  ||||||    |||   |||||  | | |  ||||| ||| |||||||</Hsp_midline>
    </Hsp>
    <Hsp>
      <Hsp_num>11</Hsp_num>
      <Hsp_bit-score>61.6992</Hsp_bit-score>
      <Hsp_score>67</Hsp_score>
      <Hsp_evalue>2.90164e-07</Hsp_evalue>
      <Hsp_query-from>38</Hsp_query-from>
      <Hsp_query-to>124</Hsp_query-to>
      <Hsp_hit-from>221174</Hsp_hit-from>
      <Hsp_hit-to>221087</Hsp_hit-to>
      <Hsp_query-frame>1</Hsp_query-frame>
      <Hsp_hit-frame>-1</Hsp_hit-frame>
      <Hsp_identity>67</Hsp_identity>
      <Hsp_positive>67</Hsp_positive>
      <Hsp_gaps>1</Hsp_gaps>
      <Hsp_align-len>88</Hsp_align-len>
      <Hsp_qseq>ATCTGTTCTTATCAGTTTAATATCTGATAC-GTCCTCTATCCGAGGACAATATATTAAATGGATTTTTGGAGCAGGGAGATGGAATAG</Hsp_qseq>
      <Hsp_hseq>ATCTGTTCTTATCAGCTTAATATCTGATACACTGCTCATTGAGCAGCTCATATATTAAACTGATTTTTGGAACCGGGCTGTGGAAAAG</Hsp_hseq>
      <Hsp_midline>||||||||||||||| ||||||||||||||  | |||  |  |  |   ||||||||||  |||||||||| | |||   ||||| ||</Hsp_midline>
    </Hsp>
    <Hsp>
      <Hsp_num>12</Hsp_num>
      <Hsp_bit-score>46.3705</Hsp_bit-score>
      <Hsp_score>50</Hsp_score>
      <Hsp_evalue>0.00639129</Hsp_evalue>
      <Hsp_query-from>1</Hsp_query-from>
      <Hsp_query-to>25</Hsp_query-to>
      <Hsp_hit-from>341226</Hsp_hit-from>
      <Hsp_hit-to>341202</Hsp_hit-to>
      <Hsp_query-frame>1</Hsp_query-frame>
      <Hsp_hit-frame>-1</Hsp_hit-frame>
      <Hsp_identity>25</Hsp_identity>
      <Hsp_positive>25</Hsp_positive>
      <Hsp_gaps>0</Hsp_gaps>
      <Hsp_align-len>25</Hsp_align-len>
      <Hsp_qseq>ATCGCTTCTCGGCCTTTTGGCTAAG</Hsp_qseq>
      <Hsp_hseq>ATCGCTTCTCGGCCTTTTGGCTAAG</Hsp_hseq>
      <Hsp_midline>|||||||||||||||||||||||||</Hsp_midline>
    </Hsp>
    <Hsp>
      <Hsp_num>13</Hsp_num>
      <Hsp_bit-score>46.3705</Hsp_bit-score>
      <Hsp_score>50</Hsp_score>
      <Hsp_evalue>0.00639129</Hsp_evalue>
      <Hsp_query-from>1</Hsp_query-from>
      <Hsp_query-to>25</Hsp_query-to>
      <Hsp_hit-from>356503</Hsp_hit-from>
      <Hsp_hit-to>356479</Hsp_hit-to>
      <Hsp_query-frame>1</Hsp_query-frame>
      <Hsp_hit-frame>-1</Hsp_hit-frame>
      <Hsp_identity>25</Hsp_identity>
      <Hsp_positive>25</Hsp_positive>
      <Hsp_gaps>0</Hsp_gaps>
      <Hsp_align-len>25</Hsp_align-len>
      <Hsp_qseq>ATCGCTTCTCGGCCTTTTGGCTAAG</Hsp_qseq>
      <Hsp_hseq>ATCGCTTCTCGGCCTTTTGGCTAAG</Hsp_hseq>
      <Hsp_midline>|||||||||||||||||||||||||</Hsp_midline>
    </Hsp>
    <Hsp>
      <Hsp_num>14</Hsp_num>
      <Hsp_bit-score>45.4688</Hsp_bit-score>
      <Hsp_score>49</Hsp_score>
      <Hsp_evalue>0.0223078</Hsp_evalue>
      <Hsp_query-from>1</Hsp_query-from>
      <Hsp_query-to>27</Hsp_query-to>
      <Hsp_hit-from>299121</Hsp_hit-from>
      <Hsp_hit-to>299095</Hsp_hit-to>
      <Hsp_query-frame>1</Hsp_query-frame>
      <Hsp_hit-frame>-1</Hsp_hit-frame>
      <Hsp_identity>26</Hsp_identity>
      <Hsp_positive>26</Hsp_positive>
      <Hsp_gaps>0</Hsp_gaps>
      <Hsp_align-len>27</Hsp_align-len>
      <Hsp_qseq>ATCGCTTCTCGGCCTTTTGGCTAAGAT</Hsp_qseq>
      <Hsp_hseq>ATCGCTTCTCGGCCTTTTGGCCAAGAT</Hsp_hseq>
      <Hsp_midline>||||||||||||||||||||| |||||</Hsp_midline>
    </Hsp>
    <Hsp>
      <Hsp_num>15</Hsp_num>
      <Hsp_bit-score>45.4688</Hsp_bit-score>
      <Hsp_score>49</Hsp_score>
      <Hsp_evalue>0.0223078</Hsp_evalue>
      <Hsp_query-from>1</Hsp_query-from>
      <Hsp_query-to>27</Hsp_query-to>
      <Hsp_hit-from>350909</Hsp_hit-from>
      <Hsp_hit-to>350883</Hsp_hit-to>
      <Hsp_query-frame>1</Hsp_query-frame>
      <Hsp_hit-frame>-1</Hsp_hit-frame>
      <Hsp_identity>26</Hsp_identity>
      <Hsp_positive>26</Hsp_positive>
      <Hsp_gaps>0</Hsp_gaps>
      <Hsp_align-len>27</Hsp_align-len>
      <Hsp_qseq>ATCGCTTCTCGGCCTTTTGGCTAAGAT</Hsp_qseq>
      <Hsp_hseq>ATCGCTTCTCGGCCTTTTGGCCAAGAT</Hsp_hseq>
      <Hsp_midline>||||||||||||||||||||| |||||</Hsp_midline>
    </Hsp>
    <Hsp>
      <Hsp_num>16</Hsp_num>
      <Hsp_bit-score>42.7638</Hsp_bit-score>
      <Hsp_score>46</Hsp_score>
      <Hsp_evalue>0.0778619</Hsp_evalue>
      <Hsp_query-from>1</Hsp_query-from>
      <Hsp_query-to>28</Hsp_query-to>
      <Hsp_hit-from>340135</Hsp_hit-from>
      <Hsp_hit-to>340108</Hsp_hit-to>
      <Hsp_query-frame>1</Hsp_query-frame>
      <Hsp_hit-frame>-1</Hsp_hit-frame>
      <Hsp_identity>26</Hsp_identity>
      <Hsp_positive>26</Hsp_positive>
      <Hsp_gaps>0</Hsp_gaps>
      <Hsp_align-len>28</Hsp_align-len>
      <Hsp_qseq>ATCGCTTCTCGGCCTTTTGGCTAAGATC</Hsp_qseq>
      <Hsp_hseq>ATCGCTTCTCGGCCTTTTGGCGAAGCTC</Hsp_hseq>
      <Hsp_midline>||||||||||||||||||||| ||| ||</Hsp_midline>
    </Hsp>
    <Hsp>
      <Hsp_num>17</Hsp_num>
      <Hsp_bit-score>41.8621</Hsp_bit-score>
      <Hsp_score>45</Hsp_score>
      <Hsp_evalue>0.271765</Hsp_evalue>
      <Hsp_query-from>1</Hsp_query-from>
      <Hsp_query-to>25</Hsp_query-to>
      <Hsp_hit-from>315293</Hsp_hit-from>
      <Hsp_hit-to>315269</Hsp_hit-to>
      <Hsp_query-frame>1</Hsp_query-frame>
      <Hsp_hit-frame>-1</Hsp_hit-frame>
      <Hsp_identity>24</Hsp_identity>
      <Hsp_positive>24</Hsp_positive>
      <Hsp_gaps>0</Hsp_gaps>
      <Hsp_align-len>25</Hsp_align-len>
      <Hsp_qseq>ATCGCTTCTCGGCCTTTTGGCTAAG</Hsp_qseq>
      <Hsp_hseq>ATCGCTTCTCGGCCTTTTGGCTGAG</Hsp_hseq>
      <Hsp_midline>|||||||||||||||||||||| ||</Hsp_midline>
    </Hsp>
    <Hsp>
      <Hsp_num>18</Hsp_num>
      <Hsp_bit-score>40.9604</Hsp_bit-score>
      <Hsp_score>44</Hsp_score>
      <Hsp_evalue>0.271765</Hsp_evalue>
      <Hsp_query-from>1</Hsp_query-from>
      <Hsp_query-to>27</Hsp_query-to>
      <Hsp_hit-from>224436</Hsp_hit-from>
      <Hsp_hit-to>224410</Hsp_hit-to>
      <Hsp_query-frame>1</Hsp_query-frame>
      <Hsp_hit-frame>-1</Hsp_hit-frame>
      <Hsp_identity>25</Hsp_identity>
      <Hsp_positive>25</Hsp_positive>
      <Hsp_gaps>0</Hsp_gaps>
      <Hsp_align-len>27</Hsp_align-len>
      <Hsp_qseq>ATCGCTTCTCGGCCTTTTGGCTAAGAT</Hsp_qseq>
      <Hsp_hseq>ATCACTTCTCGGCCTTTTGGCCAAGAT</Hsp_hseq>
      <Hsp_midline>||| ||||||||||||||||| |||||</Hsp_midline>
    </Hsp>
    <Hsp>
      <Hsp_num>19</Hsp_num>
      <Hsp_bit-score>38.2554</Hsp_bit-score>
      <Hsp_score>41</Hsp_score>
      <Hsp_evalue>3.31077</Hsp_evalue>
      <Hsp_query-from>1</Hsp_query-from>
      <Hsp_query-to>28</Hsp_query-to>
      <Hsp_hit-from>207350</Hsp_hit-from>
      <Hsp_hit-to>207323</Hsp_hit-to>
      <Hsp_query-frame>1</Hsp_query-frame>
      <Hsp_hit-frame>-1</Hsp_hit-frame>
      <Hsp_identity>25</Hsp_identity>
      <Hsp_positive>25</Hsp_positive>
      <Hsp_gaps>0</Hsp_gaps>
      <Hsp_align-len>28</Hsp_align-len>
      <Hsp_qseq>ATCGCTTCTCGGCCTTTTGGCTAAGATC</Hsp_qseq>
      <Hsp_hseq>ATCGCTTCTCAGTCTTTTGGCTAAGTTC</Hsp_hseq>
      <Hsp_midline>|||||||||| | |||||||||||| ||</Hsp_midline>
    </Hsp>
    <Hsp>
      <Hsp_num>20</Hsp_num>
      <Hsp_bit-score>38.2554</Hsp_bit-score>
      <Hsp_score>41</Hsp_score>
      <Hsp_evalue>3.31077</Hsp_evalue>
      <Hsp_query-from>7</Hsp_query-from>
      <Hsp_query-to>29</Hsp_query-to>
      <Hsp_hit-from>374762</Hsp_hit-from>
      <Hsp_hit-to>374740</Hsp_hit-to>
      <Hsp_query-frame>1</Hsp_query-frame>
      <Hsp_hit-frame>-1</Hsp_hit-frame>
      <Hsp_identity>22</Hsp_identity>
      <Hsp_positive>22</Hsp_positive>
      <Hsp_gaps>0</Hsp_gaps>
      <Hsp_align-len>23</Hsp_align-len>
      <Hsp_qseq>TCTCGGCCTTTTGGCTAAGATCA</Hsp_qseq>
      <Hsp_hseq>TCTCGGCCTTTTGGCTAAGACCA</Hsp_hseq>
      <Hsp_midline>|||||||||||||||||||| ||</Hsp_midline>
    </Hsp>
  </Hit_hsps>
</Hit>
<Hit>
  <Hit_num>13</Hit_num>
  <Hit_id>gi|1004128264|ref|NW_015441307.1|</Hit_id>
  <Hit_def>Acropora digitifera unplaced genomic scaffold, Adig_1.1 DF970942.1</Hit_def>
  <Hit_accession>NW_015441307</Hit_accession>
  <Hit_len>506828</Hit_len>
  <Hit_hsps>
    <Hsp>
      <Hsp_num>1</Hsp_num>
      <Hsp_bit-score>149.163</Hsp_bit-score>
      <Hsp_score>164</Hsp_score>
      <Hsp_evalue>7.27959e-34</Hsp_evalue>
      <Hsp_query-from>1</Hsp_query-from>
      <Hsp_query-to>173</Hsp_query-to>
      <Hsp_hit-from>94677</Hsp_hit-from>
      <Hsp_hit-to>94850</Hsp_hit-to>
      <Hsp_query-frame>1</Hsp_query-frame>
      <Hsp_hit-frame>1</Hsp_hit-frame>
      <Hsp_identity>138</Hsp_identity>
      <Hsp_positive>138</Hsp_positive>
      <Hsp_gaps>1</Hsp_gaps>
      <Hsp_align-len>174</Hsp_align-len>
      <Hsp_qseq>ATCGCTTCTCGGCCTTTTGGCTAAGATCAAGTGTAGTATCTGTTCTTATCAGTTTAATATCTGATACG-TCCTCTATCCGAGGACAATATATTAAATGGATTTTTGGAGCAGGGAGATGGAATAGGAGCTTGCTCTGTCCACTCCACGCATCGACCTGGTATTGCAGTACCTCC</Hsp_qseq>
      <Hsp_hseq>ATCGCTTCTCGGCCTTTTGGCTAAGATCAAGTGTAGTATCTGTTCTTATCAGCTTAATATCTGATACGCTGCTCATTGAGCAGCTCATATATTAAACTGATTTTTGGAACCGGGCTGTGGAAAAGAGGCTTGCCTCGTCCCAGCCACGGGTTGCCTCGGTATAGCACTACCTCC</Hsp_hseq>
      <Hsp_midline>|||||||||||||||||||||||||||||||||||||||||||||||||||| ||||||||||||||| | |||  |  |  |   ||||||||||  |||||||||| | |||   ||||| ||  ||||||   ||||   |||||  | | |  ||||| ||| |||||||</Hsp_midline>
    </Hsp>
    <Hsp>
      <Hsp_num>2</Hsp_num>
      <Hsp_bit-score>144.654</Hsp_bit-score>
      <Hsp_score>159</Hsp_score>
      <Hsp_evalue>3.09536e-32</Hsp_evalue>
      <Hsp_query-from>1</Hsp_query-from>
      <Hsp_query-to>173</Hsp_query-to>
      <Hsp_hit-from>139545</Hsp_hit-from>
      <Hsp_hit-to>139718</Hsp_hit-to>
      <Hsp_query-frame>1</Hsp_query-frame>
      <Hsp_hit-frame>1</Hsp_hit-frame>
      <Hsp_identity>137</Hsp_identity>
      <Hsp_positive>137</Hsp_positive>
      <Hsp_gaps>1</Hsp_gaps>
      <Hsp_align-len>174</Hsp_align-len>
      <Hsp_qseq>ATCGCTTCTCGGCCTTTTGGCTAAGATCAAGTGTAGTATCTGTTCTTATCAGTTTAATATCTGATACG-TCCTCTATCCGAGGACAATATATTAAATGGATTTTTGGAGCAGGGAGATGGAATAGGAGCTTGCTCTGTCCACTCCACGCATCGACCTGGTATTGCAGTACCTCC</Hsp_qseq>
      <Hsp_hseq>ATCGCTTCTCGGCCTTTTGGCTAAGATCAAGTGTAGTATCTGTTCTTATCAGCTTAATATCTGATACGCTGCTCATTGAGCAGCTCATATATTAAACTGATTTTTGGAACCGGGCTGTGGAAAAGAGGCTTGCCTCGTCCCAGCCACGGGGTGCCTCGGTATAGCACTACCTCC</Hsp_hseq>
      <Hsp_midline>|||||||||||||||||||||||||||||||||||||||||||||||||||| ||||||||||||||| | |||  |  |  |   ||||||||||  |||||||||| | |||   ||||| ||  ||||||   ||||   |||||    | |  ||||| ||| |||||||</Hsp_midline>
    </Hsp>
    <Hsp>
      <Hsp_num>3</Hsp_num>
      <Hsp_bit-score>82.4379</Hsp_bit-score>
      <Hsp_score>90</Hsp_score>
      <Hsp_evalue>8.87619e-14</Hsp_evalue>
      <Hsp_query-from>38</Hsp_query-from>
      <Hsp_query-to>173</Hsp_query-to>
      <Hsp_hit-from>92914</Hsp_hit-from>
      <Hsp_hit-to>93050</Hsp_hit-to>
      <Hsp_query-frame>1</Hsp_query-frame>
      <Hsp_hit-frame>1</Hsp_hit-frame>
      <Hsp_identity>101</Hsp_identity>
      <Hsp_positive>101</Hsp_positive>
      <Hsp_gaps>1</Hsp_gaps>
      <Hsp_align-len>137</Hsp_align-len>
      <Hsp_qseq>ATCTGTTCTTATCAGTTTAATATCTGATACG-TCCTCTATCCGAGGACAATATATTAAATGGATTTTTGGAGCAGGGAGATGGAATAGGAGCTTGCTCTGTCCACTCCACGCATCGACCTGGTATTGCAGTACCTCC</Hsp_qseq>
      <Hsp_hseq>ATCTGTTCTTATCAGCTTAATATCTGATACGCTGCTCATTGAGCAGCTCATATATTAAACTGATTTTTGGAACCGGGCTGTGGAAAAGAGGCTTGCCTCGTCCCAGCCACGGGTTGCCTCGGTATAGCACTACCTCC</Hsp_hseq>
      <Hsp_midline>||||||||||||||| ||||||||||||||| | |||  |  |  |   ||||||||||  |||||||||| | |||   ||||| ||  ||||||   ||||   |||||  | | |  ||||| ||| |||||||</Hsp_midline>
    </Hsp>
    <Hsp>
      <Hsp_num>4</Hsp_num>
      <Hsp_bit-score>82.4379</Hsp_bit-score>
      <Hsp_score>90</Hsp_score>
      <Hsp_evalue>8.87619e-14</Hsp_evalue>
      <Hsp_query-from>38</Hsp_query-from>
      <Hsp_query-to>173</Hsp_query-to>
      <Hsp_hit-from>143843</Hsp_hit-from>
      <Hsp_hit-to>143979</Hsp_hit-to>
      <Hsp_query-frame>1</Hsp_query-frame>
      <Hsp_hit-frame>1</Hsp_hit-frame>
      <Hsp_identity>101</Hsp_identity>
      <Hsp_positive>101</Hsp_positive>
      <Hsp_gaps>1</Hsp_gaps>
      <Hsp_align-len>137</Hsp_align-len>
      <Hsp_qseq>ATCTGTTCTTATCAGTTTAATATCTGATACG-TCCTCTATCCGAGGACAATATATTAAATGGATTTTTGGAGCAGGGAGATGGAATAGGAGCTTGCTCTGTCCACTCCACGCATCGACCTGGTATTGCAGTACCTCC</Hsp_qseq>
      <Hsp_hseq>ATCTGTTCTTATCAGCTTAATATCTGATACGCTGCTCATTGAGCAGCTCATATATTAAACTGATTTTTGGAACCGGGCTGTGGAAAAGGGGCTTGCCTCGTCCCAGCCATGGGTTGCCTCGGTATAGCACTACCTCC</Hsp_hseq>
      <Hsp_midline>||||||||||||||| ||||||||||||||| | |||  |  |  |   ||||||||||  |||||||||| | |||   ||||| ||| ||||||   ||||   ||| |  | | |  ||||| ||| |||||||</Hsp_midline>
    </Hsp>
    <Hsp>
      <Hsp_num>5</Hsp_num>
      <Hsp_bit-score>60.7975</Hsp_bit-score>
      <Hsp_score>66</Hsp_score>
      <Hsp_evalue>2.90164e-07</Hsp_evalue>
      <Hsp_query-from>38</Hsp_query-from>
      <Hsp_query-to>174</Hsp_query-to>
      <Hsp_hit-from>42124</Hsp_hit-from>
      <Hsp_hit-to>41988</Hsp_hit-to>
      <Hsp_query-frame>1</Hsp_query-frame>
      <Hsp_hit-frame>-1</Hsp_hit-frame>
      <Hsp_identity>100</Hsp_identity>
      <Hsp_positive>100</Hsp_positive>
      <Hsp_gaps>6</Hsp_gaps>
      <Hsp_align-len>140</Hsp_align-len>
      <Hsp_qseq>ATCTGTTCTTATCAGTTTAATATCTGATACGTCCT-CTATCCGAG--GACAATATATTAAATGGATTTTTGGAGCAGGGAGATGGAATAGGAGCTTGCTCTGTCCACTCCACGCATCGACCTGGTATTGCAGTACCTCCA</Hsp_qseq>
      <Hsp_hseq>ATCTGTTGTTATCAGTTTAATATCTGAT--GTGCTGCTCACTGAGCAGCTCATATATTAAAGTGA-TTTTGGTACCGGGCGTTGGAAAAGAGGCTTGCCTCATCTCAGCCACAGGTTGCCTTGGTATAGCACTACCTCCA</Hsp_hseq>
      <Hsp_midline>||||||| ||||||||||||||||||||  || || ||  | |||  |   ||||||||||  || ||||||  | ||| | ||||| ||  ||||||    ||    ||||   | | | |||||| ||| ||||||||</Hsp_midline>
    </Hsp>
    <Hsp>
      <Hsp_num>6</Hsp_num>
      <Hsp_bit-score>41.8621</Hsp_bit-score>
      <Hsp_score>45</Hsp_score>
      <Hsp_evalue>0.271765</Hsp_evalue>
      <Hsp_query-from>1</Hsp_query-from>
      <Hsp_query-to>25</Hsp_query-to>
      <Hsp_hit-from>106765</Hsp_hit-from>
      <Hsp_hit-to>106789</Hsp_hit-to>
      <Hsp_query-frame>1</Hsp_query-frame>
      <Hsp_hit-frame>1</Hsp_hit-frame>
      <Hsp_identity>24</Hsp_identity>
      <Hsp_positive>24</Hsp_positive>
      <Hsp_gaps>0</Hsp_gaps>
      <Hsp_align-len>25</Hsp_align-len>
      <Hsp_qseq>ATCGCTTCTCGGCCTTTTGGCTAAG</Hsp_qseq>
      <Hsp_hseq>ATCGCTTCTCGCCCTTTTGGCTAAG</Hsp_hseq>
      <Hsp_midline>||||||||||| |||||||||||||</Hsp_midline>
    </Hsp>
    <Hsp>
      <Hsp_num>7</Hsp_num>
      <Hsp_bit-score>37.3537</Hsp_bit-score>
      <Hsp_score>40</Hsp_score>
      <Hsp_evalue>3.31077</Hsp_evalue>
      <Hsp_query-from>1</Hsp_query-from>
      <Hsp_query-to>20</Hsp_query-to>
      <Hsp_hit-from>123107</Hsp_hit-from>
      <Hsp_hit-to>123126</Hsp_hit-to>
      <Hsp_query-frame>1</Hsp_query-frame>
      <Hsp_hit-frame>1</Hsp_hit-frame>
      <Hsp_identity>20</Hsp_identity>
      <Hsp_positive>20</Hsp_positive>
      <Hsp_gaps>0</Hsp_gaps>
      <Hsp_align-len>20</Hsp_align-len>
      <Hsp_qseq>ATCGCTTCTCGGCCTTTTGG</Hsp_qseq>
      <Hsp_hseq>ATCGCTTCTCGGCCTTTTGG</Hsp_hseq>
      <Hsp_midline>||||||||||||||||||||</Hsp_midline>
    </Hsp>
  </Hit_hsps>
</Hit>
<Hit>
  <Hit_num>14</Hit_num>
  <Hit_id>gi|1004128067|ref|NW_015441504.1|</Hit_id>
  <Hit_def>Acropora digitifera unplaced genomic scaffold, Adig_1.1 DF971139.1</Hit_def>
  <Hit_accession>NW_015441504</Hit_accession>
  <Hit_len>335704</Hit_len>
  <Hit_hsps>
    <Hsp>
      <Hsp_num>1</Hsp_num>
      <Hsp_bit-score>149.163</Hsp_bit-score>
      <Hsp_score>164</Hsp_score>
      <Hsp_evalue>7.27959e-34</Hsp_evalue>
      <Hsp_query-from>1</Hsp_query-from>
      <Hsp_query-to>173</Hsp_query-to>
      <Hsp_hit-from>301194</Hsp_hit-from>
      <Hsp_hit-to>301021</Hsp_hit-to>
      <Hsp_query-frame>1</Hsp_query-frame>
      <Hsp_hit-frame>-1</Hsp_hit-frame>
      <Hsp_identity>138</Hsp_identity>
      <Hsp_positive>138</Hsp_positive>
      <Hsp_gaps>1</Hsp_gaps>
      <Hsp_align-len>174</Hsp_align-len>
      <Hsp_qseq>ATCGCTTCTCGGCCTTTTGGCTAAGATCAAGTGTAGTATCTGTTCTTATCAGTTTAATATCTGATACG-TCCTCTATCCGAGGACAATATATTAAATGGATTTTTGGAGCAGGGAGATGGAATAGGAGCTTGCTCTGTCCACTCCACGCATCGACCTGGTATTGCAGTACCTCC</Hsp_qseq>
      <Hsp_hseq>ATCGCTTCTCGGCCTTTTGGCTAAGATCAAGTGTAGTATCTGTTCTTATCAGCTTAATATCTGATACGCTGCTCATTGAGCAGCTCATATATTAAACTGATTTTTGGAACCGGGCTGTGGAAAAGAGGCTTGCCTCGTCCCAGCCACGGGTTGCCTCGGTATAGCACTACCTCC</Hsp_hseq>
      <Hsp_midline>|||||||||||||||||||||||||||||||||||||||||||||||||||| ||||||||||||||| | |||  |  |  |   ||||||||||  |||||||||| | |||   ||||| ||  ||||||   ||||   |||||  | | |  ||||| ||| |||||||</Hsp_midline>
    </Hsp>
    <Hsp>
      <Hsp_num>2</Hsp_num>
      <Hsp_bit-score>41.8621</Hsp_bit-score>
      <Hsp_score>45</Hsp_score>
      <Hsp_evalue>0.271765</Hsp_evalue>
      <Hsp_query-from>1</Hsp_query-from>
      <Hsp_query-to>25</Hsp_query-to>
      <Hsp_hit-from>329233</Hsp_hit-from>
      <Hsp_hit-to>329209</Hsp_hit-to>
      <Hsp_query-frame>1</Hsp_query-frame>
      <Hsp_hit-frame>-1</Hsp_hit-frame>
      <Hsp_identity>24</Hsp_identity>
      <Hsp_positive>24</Hsp_positive>
      <Hsp_gaps>0</Hsp_gaps>
      <Hsp_align-len>25</Hsp_align-len>
      <Hsp_qseq>ATCGCTTCTCGGCCTTTTGGCTAAG</Hsp_qseq>
      <Hsp_hseq>ATCGCTTCTCGGCCTTTTGGCTGAG</Hsp_hseq>
      <Hsp_midline>|||||||||||||||||||||| ||</Hsp_midline>
    </Hsp>
    <Hsp>
      <Hsp_num>3</Hsp_num>
      <Hsp_bit-score>38.2554</Hsp_bit-score>
      <Hsp_score>41</Hsp_score>
      <Hsp_evalue>3.31077</Hsp_evalue>
      <Hsp_query-from>1</Hsp_query-from>
      <Hsp_query-to>28</Hsp_query-to>
      <Hsp_hit-from>297953</Hsp_hit-from>
      <Hsp_hit-to>297926</Hsp_hit-to>
      <Hsp_query-frame>1</Hsp_query-frame>
      <Hsp_hit-frame>-1</Hsp_hit-frame>
      <Hsp_identity>25</Hsp_identity>
      <Hsp_positive>25</Hsp_positive>
      <Hsp_gaps>0</Hsp_gaps>
      <Hsp_align-len>28</Hsp_align-len>
      <Hsp_qseq>ATCGCTTCTCGGCCTTTTGGCTAAGATC</Hsp_qseq>
      <Hsp_hseq>ATTGCTTCTCGGCCTTTTGGCGAAGCTC</Hsp_hseq>
      <Hsp_midline>|| |||||||||||||||||| ||| ||</Hsp_midline>
    </Hsp>
  </Hit_hsps>
</Hit>
<Hit>
  <Hit_num>15</Hit_num>
  <Hit_id>gi|1004128037|ref|NW_015441534.1|</Hit_id>
  <Hit_def>Acropora digitifera unplaced genomic scaffold, Adig_1.1 DF971169.1</Hit_def>
  <Hit_accession>NW_015441534</Hit_accession>
  <Hit_len>317480</Hit_len>
  <Hit_hsps>
    <Hsp>
      <Hsp_num>1</Hsp_num>
      <Hsp_bit-score>149.163</Hsp_bit-score>
      <Hsp_score>164</Hsp_score>
      <Hsp_evalue>7.27959e-34</Hsp_evalue>
      <Hsp_query-from>1</Hsp_query-from>
      <Hsp_query-to>173</Hsp_query-to>
      <Hsp_hit-from>138343</Hsp_hit-from>
      <Hsp_hit-to>138170</Hsp_hit-to>
      <Hsp_query-frame>1</Hsp_query-frame>
      <Hsp_hit-frame>-1</Hsp_hit-frame>
      <Hsp_identity>138</Hsp_identity>
      <Hsp_positive>138</Hsp_positive>
      <Hsp_gaps>1</Hsp_gaps>
      <Hsp_align-len>174</Hsp_align-len>
      <Hsp_qseq>ATCGCTTCTCGGCCTTTTGGCTAAGATCAAGTGTAGTATCTGTTCTTATCAGTTTAATATCTGATACG-TCCTCTATCCGAGGACAATATATTAAATGGATTTTTGGAGCAGGGAGATGGAATAGGAGCTTGCTCTGTCCACTCCACGCATCGACCTGGTATTGCAGTACCTCC</Hsp_qseq>
      <Hsp_hseq>ATCGCTTCTCGGCCTTTTGGCTAAGATCAAGTGTAGTATCTGTTCTTATCAGCTTAATATCTGATACGCTGCTCATTGAGCAGCTCATATATTAAACTGATTTTTGGAACCGGGCTGTGGAAAAGAGGCTTGCCTCGTCCCAGCCACGGGTTGCCTCGGTATAGCACTACCTCC</Hsp_hseq>
      <Hsp_midline>|||||||||||||||||||||||||||||||||||||||||||||||||||| ||||||||||||||| | |||  |  |  |   ||||||||||  |||||||||| | |||   ||||| ||  ||||||   ||||   |||||  | | |  ||||| ||| |||||||</Hsp_midline>
    </Hsp>
    <Hsp>
      <Hsp_num>2</Hsp_num>
      <Hsp_bit-score>77.9295</Hsp_bit-score>
      <Hsp_score>85</Hsp_score>
      <Hsp_evalue>3.77425e-12</Hsp_evalue>
      <Hsp_query-from>38</Hsp_query-from>
      <Hsp_query-to>173</Hsp_query-to>
      <Hsp_hit-from>146028</Hsp_hit-from>
      <Hsp_hit-to>145892</Hsp_hit-to>
      <Hsp_query-frame>1</Hsp_query-frame>
      <Hsp_hit-frame>-1</Hsp_hit-frame>
      <Hsp_identity>100</Hsp_identity>
      <Hsp_positive>100</Hsp_positive>
      <Hsp_gaps>1</Hsp_gaps>
      <Hsp_align-len>137</Hsp_align-len>
      <Hsp_qseq>ATCTGTTCTTATCAGTTTAATATCTGATACG-TCCTCTATCCGAGGACAATATATTAAATGGATTTTTGGAGCAGGGAGATGGAATAGGAGCTTGCTCTGTCCACTCCACGCATCGACCTGGTATTGCAGTACCTCC</Hsp_qseq>
      <Hsp_hseq>ATCTGTTCTTATCAGCTTAATATCTGATACGCTGCTCATTGAGCAGCTCATATATTAAACTGATTTTTGGAACCGGGCTGTGGAAAAGAGGCTTGCCTCATCCCAGCCACGGGTTGCCTCGGTATAGCACTACCTCC</Hsp_hseq>
      <Hsp_midline>||||||||||||||| ||||||||||||||| | |||  |  |  |   ||||||||||  |||||||||| | |||   ||||| ||  ||||||    |||   |||||  | | |  ||||| ||| |||||||</Hsp_midline>
    </Hsp>
    <Hsp>
      <Hsp_num>3</Hsp_num>
      <Hsp_bit-score>41.8621</Hsp_bit-score>
      <Hsp_score>45</Hsp_score>
      <Hsp_evalue>0.271765</Hsp_evalue>
      <Hsp_query-from>1</Hsp_query-from>
      <Hsp_query-to>25</Hsp_query-to>
      <Hsp_hit-from>136586</Hsp_hit-from>
      <Hsp_hit-to>136562</Hsp_hit-to>
      <Hsp_query-frame>1</Hsp_query-frame>
      <Hsp_hit-frame>-1</Hsp_hit-frame>
      <Hsp_identity>24</Hsp_identity>
      <Hsp_positive>24</Hsp_positive>
      <Hsp_gaps>0</Hsp_gaps>
      <Hsp_align-len>25</Hsp_align-len>
      <Hsp_qseq>ATCGCTTCTCGGCCTTTTGGCTAAG</Hsp_qseq>
      <Hsp_hseq>ATCGCTTCTCGGTCTTTTGGCTAAG</Hsp_hseq>
      <Hsp_midline>|||||||||||| ||||||||||||</Hsp_midline>
    </Hsp>
  </Hit_hsps>
</Hit>
<Hit>
  <Hit_num>16</Hit_num>
  <Hit_id>gi|1004127564|ref|NW_015442007.1|</Hit_id>
  <Hit_def>Acropora digitifera unplaced genomic scaffold, Adig_1.1 DF971642.1</Hit_def>
  <Hit_accession>NW_015442007</Hit_accession>
  <Hit_len>115719</Hit_len>
  <Hit_hsps>
    <Hsp>
      <Hsp_num>1</Hsp_num>
      <Hsp_bit-score>149.163</Hsp_bit-score>
      <Hsp_score>164</Hsp_score>
      <Hsp_evalue>7.27959e-34</Hsp_evalue>
      <Hsp_query-from>1</Hsp_query-from>
      <Hsp_query-to>173</Hsp_query-to>
      <Hsp_hit-from>55217</Hsp_hit-from>
      <Hsp_hit-to>55044</Hsp_hit-to>
      <Hsp_query-frame>1</Hsp_query-frame>
      <Hsp_hit-frame>-1</Hsp_hit-frame>
      <Hsp_identity>138</Hsp_identity>
      <Hsp_positive>138</Hsp_positive>
      <Hsp_gaps>1</Hsp_gaps>
      <Hsp_align-len>174</Hsp_align-len>
      <Hsp_qseq>ATCGCTTCTCGGCCTTTTGGCTAAGATCAAGTGTAGTATCTGTTCTTATCAGTTTAATATCTGATACG-TCCTCTATCCGAGGACAATATATTAAATGGATTTTTGGAGCAGGGAGATGGAATAGGAGCTTGCTCTGTCCACTCCACGCATCGACCTGGTATTGCAGTACCTCC</Hsp_qseq>
      <Hsp_hseq>ATCGCTTCTCGGCCTTTTGGCTAAGATCAAGTGTAGTATCTGTTCTTATCAGCTTAATATCTGATACGCTGCTCATTGAGCAGCTCATATATTAAACTGATTTTTGGAACCGGGCTGTGGAAAAGAGGCTTGCCTCGTCCCAGCCACGGGTTGCCTCGGTATAGCACTACCTCC</Hsp_hseq>
      <Hsp_midline>|||||||||||||||||||||||||||||||||||||||||||||||||||| ||||||||||||||| | |||  |  |  |   ||||||||||  |||||||||| | |||   ||||| ||  ||||||   ||||   |||||  | | |  ||||| ||| |||||||</Hsp_midline>
    </Hsp>
    <Hsp>
      <Hsp_num>2</Hsp_num>
      <Hsp_bit-score>149.163</Hsp_bit-score>
      <Hsp_score>164</Hsp_score>
      <Hsp_evalue>7.27959e-34</Hsp_evalue>
      <Hsp_query-from>1</Hsp_query-from>
      <Hsp_query-to>173</Hsp_query-to>
      <Hsp_hit-from>57029</Hsp_hit-from>
      <Hsp_hit-to>56856</Hsp_hit-to>
      <Hsp_query-frame>1</Hsp_query-frame>
      <Hsp_hit-frame>-1</Hsp_hit-frame>
      <Hsp_identity>138</Hsp_identity>
      <Hsp_positive>138</Hsp_positive>
      <Hsp_gaps>1</Hsp_gaps>
      <Hsp_align-len>174</Hsp_align-len>
      <Hsp_qseq>ATCGCTTCTCGGCCTTTTGGCTAAGATCAAGTGTAGTATCTGTTCTTATCAGTTTAATATCTGATACG-TCCTCTATCCGAGGACAATATATTAAATGGATTTTTGGAGCAGGGAGATGGAATAGGAGCTTGCTCTGTCCACTCCACGCATCGACCTGGTATTGCAGTACCTCC</Hsp_qseq>
      <Hsp_hseq>ATCGCTTCTCGGCCTTTTGGCTAAGATCAAGTGTAGTATCTGTTCTTATCAGCTTAATATCTGATACGCTGCTCATTGAGCAGCTCATATATTAAACTGATTTTTGGAACCGGGCTGTGGAAAAGAGGCTTGCCTCGTCCCAGCCACGGGTTGCCTCGGTATAGCACTACCTCC</Hsp_hseq>
      <Hsp_midline>|||||||||||||||||||||||||||||||||||||||||||||||||||| ||||||||||||||| | |||  |  |  |   ||||||||||  |||||||||| | |||   ||||| ||  ||||||   ||||   |||||  | | |  ||||| ||| |||||||</Hsp_midline>
    </Hsp>
    <Hsp>
      <Hsp_num>3</Hsp_num>
      <Hsp_bit-score>149.163</Hsp_bit-score>
      <Hsp_score>164</Hsp_score>
      <Hsp_evalue>7.27959e-34</Hsp_evalue>
      <Hsp_query-from>1</Hsp_query-from>
      <Hsp_query-to>173</Hsp_query-to>
      <Hsp_hit-from>58841</Hsp_hit-from>
      <Hsp_hit-to>58668</Hsp_hit-to>
      <Hsp_query-frame>1</Hsp_query-frame>
      <Hsp_hit-frame>-1</Hsp_hit-frame>
      <Hsp_identity>138</Hsp_identity>
      <Hsp_positive>138</Hsp_positive>
      <Hsp_gaps>1</Hsp_gaps>
      <Hsp_align-len>174</Hsp_align-len>
      <Hsp_qseq>ATCGCTTCTCGGCCTTTTGGCTAAGATCAAGTGTAGTATCTGTTCTTATCAGTTTAATATCTGATACG-TCCTCTATCCGAGGACAATATATTAAATGGATTTTTGGAGCAGGGAGATGGAATAGGAGCTTGCTCTGTCCACTCCACGCATCGACCTGGTATTGCAGTACCTCC</Hsp_qseq>
      <Hsp_hseq>ATCGCTTCTCGGCCTTTTGGCTAAGATCAAGTGTAGTATCTGTTCTTATCAGCTTAATATCTGATACGCTGCTCATTGAGCAGCTCATATATTAAACTGATTTTTGGAACCGGGCTGTGGAAAAGAGGCTTGCCTCGTCCCAGCCACGGGTTGCCTCGGTATAGCACTACCTCC</Hsp_hseq>
      <Hsp_midline>|||||||||||||||||||||||||||||||||||||||||||||||||||| ||||||||||||||| | |||  |  |  |   ||||||||||  |||||||||| | |||   ||||| ||  ||||||   ||||   |||||  | | |  ||||| ||| |||||||</Hsp_midline>
    </Hsp>
    <Hsp>
      <Hsp_num>4</Hsp_num>
      <Hsp_bit-score>149.163</Hsp_bit-score>
      <Hsp_score>164</Hsp_score>
      <Hsp_evalue>7.27959e-34</Hsp_evalue>
      <Hsp_query-from>1</Hsp_query-from>
      <Hsp_query-to>173</Hsp_query-to>
      <Hsp_hit-from>60653</Hsp_hit-from>
      <Hsp_hit-to>60480</Hsp_hit-to>
      <Hsp_query-frame>1</Hsp_query-frame>
      <Hsp_hit-frame>-1</Hsp_hit-frame>
      <Hsp_identity>138</Hsp_identity>
      <Hsp_positive>138</Hsp_positive>
      <Hsp_gaps>1</Hsp_gaps>
      <Hsp_align-len>174</Hsp_align-len>
      <Hsp_qseq>ATCGCTTCTCGGCCTTTTGGCTAAGATCAAGTGTAGTATCTGTTCTTATCAGTTTAATATCTGATACG-TCCTCTATCCGAGGACAATATATTAAATGGATTTTTGGAGCAGGGAGATGGAATAGGAGCTTGCTCTGTCCACTCCACGCATCGACCTGGTATTGCAGTACCTCC</Hsp_qseq>
      <Hsp_hseq>ATCGCTTCTCGGCCTTTTGGCTAAGATCAAGTGTAGTATCTGTTCTTATCAGCTTAATATCTGATACGCTGCTCATTGAGCAGCTCATATATTAAACTGATTTTTGGAACCGGGCTGTGGAAAAGAGGCTTGCCTCGTCCCAGCCACGGGTTGCCTCGGTATAGCACTACCTCC</Hsp_hseq>
      <Hsp_midline>|||||||||||||||||||||||||||||||||||||||||||||||||||| ||||||||||||||| | |||  |  |  |   ||||||||||  |||||||||| | |||   ||||| ||  ||||||   ||||   |||||  | | |  ||||| ||| |||||||</Hsp_midline>
    </Hsp>
    <Hsp>
      <Hsp_num>5</Hsp_num>
      <Hsp_bit-score>149.163</Hsp_bit-score>
      <Hsp_score>164</Hsp_score>
      <Hsp_evalue>7.27959e-34</Hsp_evalue>
      <Hsp_query-from>1</Hsp_query-from>
      <Hsp_query-to>173</Hsp_query-to>
      <Hsp_hit-from>62465</Hsp_hit-from>
      <Hsp_hit-to>62292</Hsp_hit-to>
      <Hsp_query-frame>1</Hsp_query-frame>
      <Hsp_hit-frame>-1</Hsp_hit-frame>
      <Hsp_identity>138</Hsp_identity>
      <Hsp_positive>138</Hsp_positive>
      <Hsp_gaps>1</Hsp_gaps>
      <Hsp_align-len>174</Hsp_align-len>
      <Hsp_qseq>ATCGCTTCTCGGCCTTTTGGCTAAGATCAAGTGTAGTATCTGTTCTTATCAGTTTAATATCTGATACG-TCCTCTATCCGAGGACAATATATTAAATGGATTTTTGGAGCAGGGAGATGGAATAGGAGCTTGCTCTGTCCACTCCACGCATCGACCTGGTATTGCAGTACCTCC</Hsp_qseq>
      <Hsp_hseq>ATCGCTTCTCGGCCTTTTGGCTAAGATCAAGTGTAGTATCTGTTCTTATCAGCTTAATATCTGATACGCTGCTCATTGAGCAGCTCATATATTAAACTGATTTTTGGAACCGGGCTGTGGAAAAGAGGCTTGCCTCGTCCCAGCCACGGGTTGCCTCGGTATAGCACTACCTCC</Hsp_hseq>
      <Hsp_midline>|||||||||||||||||||||||||||||||||||||||||||||||||||| ||||||||||||||| | |||  |  |  |   ||||||||||  |||||||||| | |||   ||||| ||  ||||||   ||||   |||||  | | |  ||||| ||| |||||||</Hsp_midline>
    </Hsp>
    <Hsp>
      <Hsp_num>6</Hsp_num>
      <Hsp_bit-score>149.163</Hsp_bit-score>
      <Hsp_score>164</Hsp_score>
      <Hsp_evalue>7.27959e-34</Hsp_evalue>
      <Hsp_query-from>1</Hsp_query-from>
      <Hsp_query-to>173</Hsp_query-to>
      <Hsp_hit-from>64277</Hsp_hit-from>
      <Hsp_hit-to>64104</Hsp_hit-to>
      <Hsp_query-frame>1</Hsp_query-frame>
      <Hsp_hit-frame>-1</Hsp_hit-frame>
      <Hsp_identity>138</Hsp_identity>
      <Hsp_positive>138</Hsp_positive>
      <Hsp_gaps>1</Hsp_gaps>
      <Hsp_align-len>174</Hsp_align-len>
      <Hsp_qseq>ATCGCTTCTCGGCCTTTTGGCTAAGATCAAGTGTAGTATCTGTTCTTATCAGTTTAATATCTGATACG-TCCTCTATCCGAGGACAATATATTAAATGGATTTTTGGAGCAGGGAGATGGAATAGGAGCTTGCTCTGTCCACTCCACGCATCGACCTGGTATTGCAGTACCTCC</Hsp_qseq>
      <Hsp_hseq>ATCGCTTCTCGGCCTTTTGGCTAAGATCAAGTGTAGTATCTGTTCTTATCAGCTTAATATCTGATACGCTGCTCATTGAGCAGCTCATATATTAAACTGATTTTTGGAACCGGGCTGTGGAAAAGAGGCTTGCCTCGTCCCAGCCACGGGTTGCCTCGGTATAGCACTACCTCC</Hsp_hseq>
      <Hsp_midline>|||||||||||||||||||||||||||||||||||||||||||||||||||| ||||||||||||||| | |||  |  |  |   ||||||||||  |||||||||| | |||   ||||| ||  ||||||   ||||   |||||  | | |  ||||| ||| |||||||</Hsp_midline>
    </Hsp>
    <Hsp>
      <Hsp_num>7</Hsp_num>
      <Hsp_bit-score>133.834</Hsp_bit-score>
      <Hsp_score>147</Hsp_score>
      <Hsp_evalue>5.59654e-29</Hsp_evalue>
      <Hsp_query-from>1</Hsp_query-from>
      <Hsp_query-to>132</Hsp_query-to>
      <Hsp_hit-from>53405</Hsp_hit-from>
      <Hsp_hit-to>53273</Hsp_hit-to>
      <Hsp_query-frame>1</Hsp_query-frame>
      <Hsp_hit-frame>-1</Hsp_hit-frame>
      <Hsp_identity>110</Hsp_identity>
      <Hsp_positive>110</Hsp_positive>
      <Hsp_gaps>1</Hsp_gaps>
      <Hsp_align-len>133</Hsp_align-len>
      <Hsp_qseq>ATCGCTTCTCGGCCTTTTGGCTAAGATCAAGTGTAGTATCTGTTCTTATCAGTTTAATATCTGATACG-TCCTCTATCCGAGGACAATATATTAAATGGATTTTTGGAGCAGGGAGATGGAATAGGAGCTTGC</Hsp_qseq>
      <Hsp_hseq>ATCGCTTCTCGGCCTTTTGGCTAAGATCAAGTGTAGTATCTGTTCTTATCAGCTTAATATCTGATACGCTGCTCATTGAGCAGCTCATATATTAAACTGATTTTTGGAACCGGGCTGTGGAAAAGAGGGTTGC</Hsp_hseq>
      <Hsp_midline>|||||||||||||||||||||||||||||||||||||||||||||||||||| ||||||||||||||| | |||  |  |  |   ||||||||||  |||||||||| | |||   ||||| ||  | ||||</Hsp_midline>
    </Hsp>
    <Hsp>
      <Hsp_num>8</Hsp_num>
      <Hsp_bit-score>43.6655</Hsp_bit-score>
      <Hsp_score>47</Hsp_score>
      <Hsp_evalue>0.0778619</Hsp_evalue>
      <Hsp_query-from>38</Hsp_query-from>
      <Hsp_query-to>104</Hsp_query-to>
      <Hsp_hit-from>98006</Hsp_hit-from>
      <Hsp_hit-to>97939</Hsp_hit-to>
      <Hsp_query-frame>1</Hsp_query-frame>
      <Hsp_hit-frame>-1</Hsp_hit-frame>
      <Hsp_identity>51</Hsp_identity>
      <Hsp_positive>51</Hsp_positive>
      <Hsp_gaps>1</Hsp_gaps>
      <Hsp_align-len>68</Hsp_align-len>
      <Hsp_qseq>ATCTGTTCTTATCAGTTTAATATCTGATACG-TCCTCTATCCGAGGACAATATATTAAATGGATTTTT</Hsp_qseq>
      <Hsp_hseq>ATCTGTTCTTATCAGCTCAATATCTGATCTGCTCCTCATTGAGCAGCTCATATATTACACTGATTTTT</Hsp_hseq>
      <Hsp_midline>||||||||||||||| | ||||||||||  | |||||  |  |  |   |||||||| |  |||||||</Hsp_midline>
    </Hsp>
    <Hsp>
      <Hsp_num>9</Hsp_num>
      <Hsp_bit-score>40.0587</Hsp_bit-score>
      <Hsp_score>43</Hsp_score>
      <Hsp_evalue>0.948552</Hsp_evalue>
      <Hsp_query-from>1</Hsp_query-from>
      <Hsp_query-to>24</Hsp_query-to>
      <Hsp_hit-from>50663</Hsp_hit-from>
      <Hsp_hit-to>50640</Hsp_hit-to>
      <Hsp_query-frame>1</Hsp_query-frame>
      <Hsp_hit-frame>-1</Hsp_hit-frame>
      <Hsp_identity>23</Hsp_identity>
      <Hsp_positive>23</Hsp_positive>
      <Hsp_gaps>0</Hsp_gaps>
      <Hsp_align-len>24</Hsp_align-len>
      <Hsp_qseq>ATCGCTTCTCGGCCTTTTGGCTAA</Hsp_qseq>
      <Hsp_hseq>ATCGCTTCTTGGCCTTTTGGCTAA</Hsp_hseq>
      <Hsp_midline>||||||||| ||||||||||||||</Hsp_midline>
    </Hsp>
    <Hsp>
      <Hsp_num>10</Hsp_num>
      <Hsp_bit-score>38.2554</Hsp_bit-score>
      <Hsp_score>41</Hsp_score>
      <Hsp_evalue>3.31077</Hsp_evalue>
      <Hsp_query-from>1</Hsp_query-from>
      <Hsp_query-to>28</Hsp_query-to>
      <Hsp_hit-from>102681</Hsp_hit-from>
      <Hsp_hit-to>102654</Hsp_hit-to>
      <Hsp_query-frame>1</Hsp_query-frame>
      <Hsp_hit-frame>-1</Hsp_hit-frame>
      <Hsp_identity>25</Hsp_identity>
      <Hsp_positive>25</Hsp_positive>
      <Hsp_gaps>0</Hsp_gaps>
      <Hsp_align-len>28</Hsp_align-len>
      <Hsp_qseq>ATCGCTTCTCGGCCTTTTGGCTAAGATC</Hsp_qseq>
      <Hsp_hseq>ATCGCTTCTCGGCCTTTTGGTGAAGCTC</Hsp_hseq>
      <Hsp_midline>||||||||||||||||||||  ||| ||</Hsp_midline>
    </Hsp>
  </Hit_hsps>
</Hit>
<Hit>
  <Hit_num>17</Hit_num>
  <Hit_id>gi|1004127365|ref|NW_015442206.1|</Hit_id>
  <Hit_def>Acropora digitifera unplaced genomic scaffold, Adig_1.1 DF971841.1</Hit_def>
  <Hit_accession>NW_015442206</Hit_accession>
  <Hit_len>73751</Hit_len>
  <Hit_hsps>
    <Hsp>
      <Hsp_num>1</Hsp_num>
      <Hsp_bit-score>149.163</Hsp_bit-score>
      <Hsp_score>164</Hsp_score>
      <Hsp_evalue>7.27959e-34</Hsp_evalue>
      <Hsp_query-from>1</Hsp_query-from>
      <Hsp_query-to>173</Hsp_query-to>
      <Hsp_hit-from>17482</Hsp_hit-from>
      <Hsp_hit-to>17655</Hsp_hit-to>
      <Hsp_query-frame>1</Hsp_query-frame>
      <Hsp_hit-frame>1</Hsp_hit-frame>
      <Hsp_identity>138</Hsp_identity>
      <Hsp_positive>138</Hsp_positive>
      <Hsp_gaps>1</Hsp_gaps>
      <Hsp_align-len>174</Hsp_align-len>
      <Hsp_qseq>ATCGCTTCTCGGCCTTTTGGCTAAGATCAAGTGTAGTATCTGTTCTTATCAGTTTAATATCTGATACG-TCCTCTATCCGAGGACAATATATTAAATGGATTTTTGGAGCAGGGAGATGGAATAGGAGCTTGCTCTGTCCACTCCACGCATCGACCTGGTATTGCAGTACCTCC</Hsp_qseq>
      <Hsp_hseq>ATCGCTTCTCGGCCTTTTGGCTAAGATCAAGTGTAGTATCTGTTCTTATCAGCTTAATATCTGATACGCTGCTCATTGAGCAGCTCATATATTAAACTGATTTTTGGAACCGGGCTGTGGAAAAGAGGCTTGCCTCGTCCCAGCCACGGGTTGCCTCGGTATAGCACTACCTCC</Hsp_hseq>
      <Hsp_midline>|||||||||||||||||||||||||||||||||||||||||||||||||||| ||||||||||||||| | |||  |  |  |   ||||||||||  |||||||||| | |||   ||||| ||  ||||||   ||||   |||||  | | |  ||||| ||| |||||||</Hsp_midline>
    </Hsp>
    <Hsp>
      <Hsp_num>2</Hsp_num>
      <Hsp_bit-score>149.163</Hsp_bit-score>
      <Hsp_score>164</Hsp_score>
      <Hsp_evalue>7.27959e-34</Hsp_evalue>
      <Hsp_query-from>1</Hsp_query-from>
      <Hsp_query-to>173</Hsp_query-to>
      <Hsp_hit-from>58212</Hsp_hit-from>
      <Hsp_hit-to>58039</Hsp_hit-to>
      <Hsp_query-frame>1</Hsp_query-frame>
      <Hsp_hit-frame>-1</Hsp_hit-frame>
      <Hsp_identity>138</Hsp_identity>
      <Hsp_positive>138</Hsp_positive>
      <Hsp_gaps>1</Hsp_gaps>
      <Hsp_align-len>174</Hsp_align-len>
      <Hsp_qseq>ATCGCTTCTCGGCCTTTTGGCTAAGATCAAGTGTAGTATCTGTTCTTATCAGTTTAATATCTGATACG-TCCTCTATCCGAGGACAATATATTAAATGGATTTTTGGAGCAGGGAGATGGAATAGGAGCTTGCTCTGTCCACTCCACGCATCGACCTGGTATTGCAGTACCTCC</Hsp_qseq>
      <Hsp_hseq>ATCGCTTCTCGGCCTTTTGGCTAAGATCAAGTGTAGTATCTGTTCTTATCAGCTTAATATCTGATACGCTGCTCATTGAGCAGCTCATATATTAAACTGATTTTTGGAACCGGGCTGTGGAAAAGAGGCTTGCCTCGTCCCAGCCACGGGTTGCCTCGGTATAGCACTACCTCC</Hsp_hseq>
      <Hsp_midline>|||||||||||||||||||||||||||||||||||||||||||||||||||| ||||||||||||||| | |||  |  |  |   ||||||||||  |||||||||| | |||   ||||| ||  ||||||   ||||   |||||  | | |  ||||| ||| |||||||</Hsp_midline>
    </Hsp>
    <Hsp>
      <Hsp_num>3</Hsp_num>
      <Hsp_bit-score>149.163</Hsp_bit-score>
      <Hsp_score>164</Hsp_score>
      <Hsp_evalue>7.27959e-34</Hsp_evalue>
      <Hsp_query-from>1</Hsp_query-from>
      <Hsp_query-to>173</Hsp_query-to>
      <Hsp_hit-from>61777</Hsp_hit-from>
      <Hsp_hit-to>61604</Hsp_hit-to>
      <Hsp_query-frame>1</Hsp_query-frame>
      <Hsp_hit-frame>-1</Hsp_hit-frame>
      <Hsp_identity>138</Hsp_identity>
      <Hsp_positive>138</Hsp_positive>
      <Hsp_gaps>1</Hsp_gaps>
      <Hsp_align-len>174</Hsp_align-len>
      <Hsp_qseq>ATCGCTTCTCGGCCTTTTGGCTAAGATCAAGTGTAGTATCTGTTCTTATCAGTTTAATATCTGATACG-TCCTCTATCCGAGGACAATATATTAAATGGATTTTTGGAGCAGGGAGATGGAATAGGAGCTTGCTCTGTCCACTCCACGCATCGACCTGGTATTGCAGTACCTCC</Hsp_qseq>
      <Hsp_hseq>ATCGCTTCTCGGCCTTTTGGCTAAGATCAAGTGTAGTATCTGTTCTTATCAGCTTAATATCTGATACGCTGCTCATTGAGCAGCTCATATATTAAACTGATTTTTGGAACCGGGCTGTGGAAAAGAGGCTTGCCTCGTCCCAGCCACGGGTTGCCTCGGTATAGCACTACCTCC</Hsp_hseq>
      <Hsp_midline>|||||||||||||||||||||||||||||||||||||||||||||||||||| ||||||||||||||| | |||  |  |  |   ||||||||||  |||||||||| | |||   ||||| ||  ||||||   ||||   |||||  | | |  ||||| ||| |||||||</Hsp_midline>
    </Hsp>
    <Hsp>
      <Hsp_num>4</Hsp_num>
      <Hsp_bit-score>77.9295</Hsp_bit-score>
      <Hsp_score>85</Hsp_score>
      <Hsp_evalue>3.77425e-12</Hsp_evalue>
      <Hsp_query-from>38</Hsp_query-from>
      <Hsp_query-to>173</Hsp_query-to>
      <Hsp_hit-from>31958</Hsp_hit-from>
      <Hsp_hit-to>31822</Hsp_hit-to>
      <Hsp_query-frame>1</Hsp_query-frame>
      <Hsp_hit-frame>-1</Hsp_hit-frame>
      <Hsp_identity>100</Hsp_identity>
      <Hsp_positive>100</Hsp_positive>
      <Hsp_gaps>1</Hsp_gaps>
      <Hsp_align-len>137</Hsp_align-len>
      <Hsp_qseq>ATCTGTTCTTATCAGTTTAATATCTGATACG-TCCTCTATCCGAGGACAATATATTAAATGGATTTTTGGAGCAGGGAGATGGAATAGGAGCTTGCTCTGTCCACTCCACGCATCGACCTGGTATTGCAGTACCTCC</Hsp_qseq>
      <Hsp_hseq>ATCTGTTCTTATTAGCTTAATATCTGATACGCTGCTCATTGAGCAGCTCATATATTAAACTGATTTTTGGAACCGGGCTGTGGAAAAGAGGCTTGCCTCGTCCCAGCCACGGGTTGCCTCGGTATAGCACTACCTCC</Hsp_hseq>
      <Hsp_midline>|||||||||||| || ||||||||||||||| | |||  |  |  |   ||||||||||  |||||||||| | |||   ||||| ||  ||||||   ||||   |||||  | | |  ||||| ||| |||||||</Hsp_midline>
    </Hsp>
    <Hsp>
      <Hsp_num>5</Hsp_num>
      <Hsp_bit-score>73.4211</Hsp_bit-score>
      <Hsp_score>80</Hsp_score>
      <Hsp_evalue>4.59798e-11</Hsp_evalue>
      <Hsp_query-from>38</Hsp_query-from>
      <Hsp_query-to>173</Hsp_query-to>
      <Hsp_hit-from>38598</Hsp_hit-from>
      <Hsp_hit-to>38462</Hsp_hit-to>
      <Hsp_query-frame>1</Hsp_query-frame>
      <Hsp_hit-frame>-1</Hsp_hit-frame>
      <Hsp_identity>99</Hsp_identity>
      <Hsp_positive>99</Hsp_positive>
      <Hsp_gaps>1</Hsp_gaps>
      <Hsp_align-len>137</Hsp_align-len>
      <Hsp_qseq>ATCTGTTCTTATCAGTTTAATATCTGATACG-TCCTCTATCCGAGGACAATATATTAAATGGATTTTTGGAGCAGGGAGATGGAATAGGAGCTTGCTCTGTCCACTCCACGCATCGACCTGGTATTGCAGTACCTCC</Hsp_qseq>
      <Hsp_hseq>ATCTGTTCTTATCAGCTTAAGATCTGATACGCTGCTCATTGAGCAGCTCATATATTAAACTGATTTTTGGAACCGGGCTGTGGAAAAGAGGCTTGCCTCATCCCAGCCACGGGTTGCCTCGGTATAGCACTACCTCC</Hsp_hseq>
      <Hsp_midline>||||||||||||||| |||| |||||||||| | |||  |  |  |   ||||||||||  |||||||||| | |||   ||||| ||  ||||||    |||   |||||  | | |  ||||| ||| |||||||</Hsp_midline>
    </Hsp>
    <Hsp>
      <Hsp_num>6</Hsp_num>
      <Hsp_bit-score>49.0756</Hsp_bit-score>
      <Hsp_score>53</Hsp_score>
      <Hsp_evalue>0.00183114</Hsp_evalue>
      <Hsp_query-from>40</Hsp_query-from>
      <Hsp_query-to>68</Hsp_query-to>
      <Hsp_hit-from>28681</Hsp_hit-from>
      <Hsp_hit-to>28653</Hsp_hit-to>
      <Hsp_query-frame>1</Hsp_query-frame>
      <Hsp_hit-frame>-1</Hsp_hit-frame>
      <Hsp_identity>28</Hsp_identity>
      <Hsp_positive>28</Hsp_positive>
      <Hsp_gaps>0</Hsp_gaps>
      <Hsp_align-len>29</Hsp_align-len>
      <Hsp_qseq>CTGTTCTTATCAGTTTAATATCTGATACG</Hsp_qseq>
      <Hsp_hseq>CTGTTCTTATCAGCTTAATATCTGATACG</Hsp_hseq>
      <Hsp_midline>||||||||||||| |||||||||||||||</Hsp_midline>
    </Hsp>
    <Hsp>
      <Hsp_num>7</Hsp_num>
      <Hsp_bit-score>48.1739</Hsp_bit-score>
      <Hsp_score>52</Hsp_score>
      <Hsp_evalue>0.00183114</Hsp_evalue>
      <Hsp_query-from>1</Hsp_query-from>
      <Hsp_query-to>26</Hsp_query-to>
      <Hsp_hit-from>59778</Hsp_hit-from>
      <Hsp_hit-to>59753</Hsp_hit-to>
      <Hsp_query-frame>1</Hsp_query-frame>
      <Hsp_hit-frame>-1</Hsp_hit-frame>
      <Hsp_identity>26</Hsp_identity>
      <Hsp_positive>26</Hsp_positive>
      <Hsp_gaps>0</Hsp_gaps>
      <Hsp_align-len>26</Hsp_align-len>
      <Hsp_qseq>ATCGCTTCTCGGCCTTTTGGCTAAGA</Hsp_qseq>
      <Hsp_hseq>ATCGCTTCTCGGCCTTTTGGCTAAGA</Hsp_hseq>
      <Hsp_midline>||||||||||||||||||||||||||</Hsp_midline>
    </Hsp>
    <Hsp>
      <Hsp_num>8</Hsp_num>
      <Hsp_bit-score>42.7638</Hsp_bit-score>
      <Hsp_score>46</Hsp_score>
      <Hsp_evalue>0.0778619</Hsp_evalue>
      <Hsp_query-from>1</Hsp_query-from>
      <Hsp_query-to>23</Hsp_query-to>
      <Hsp_hit-from>30186</Hsp_hit-from>
      <Hsp_hit-to>30164</Hsp_hit-to>
      <Hsp_query-frame>1</Hsp_query-frame>
      <Hsp_hit-frame>-1</Hsp_hit-frame>
      <Hsp_identity>23</Hsp_identity>
      <Hsp_positive>23</Hsp_positive>
      <Hsp_gaps>0</Hsp_gaps>
      <Hsp_align-len>23</Hsp_align-len>
      <Hsp_qseq>ATCGCTTCTCGGCCTTTTGGCTA</Hsp_qseq>
      <Hsp_hseq>ATCGCTTCTCGGCCTTTTGGCTA</Hsp_hseq>
      <Hsp_midline>|||||||||||||||||||||||</Hsp_midline>
    </Hsp>
    <Hsp>
      <Hsp_num>9</Hsp_num>
      <Hsp_bit-score>42.7638</Hsp_bit-score>
      <Hsp_score>46</Hsp_score>
      <Hsp_evalue>0.0778619</Hsp_evalue>
      <Hsp_query-from>1</Hsp_query-from>
      <Hsp_query-to>28</Hsp_query-to>
      <Hsp_hit-from>43504</Hsp_hit-from>
      <Hsp_hit-to>43477</Hsp_hit-to>
      <Hsp_query-frame>1</Hsp_query-frame>
      <Hsp_hit-frame>-1</Hsp_hit-frame>
      <Hsp_identity>26</Hsp_identity>
      <Hsp_positive>26</Hsp_positive>
      <Hsp_gaps>0</Hsp_gaps>
      <Hsp_align-len>28</Hsp_align-len>
      <Hsp_qseq>ATCGCTTCTCGGCCTTTTGGCTAAGATC</Hsp_qseq>
      <Hsp_hseq>ATCGCTTCTCGGCCTTTTGCCTAAGGTC</Hsp_hseq>
      <Hsp_midline>||||||||||||||||||| ||||| ||</Hsp_midline>
    </Hsp>
    <Hsp>
      <Hsp_num>10</Hsp_num>
      <Hsp_bit-score>40.9604</Hsp_bit-score>
      <Hsp_score>44</Hsp_score>
      <Hsp_evalue>0.271765</Hsp_evalue>
      <Hsp_query-from>1</Hsp_query-from>
      <Hsp_query-to>27</Hsp_query-to>
      <Hsp_hit-from>36857</Hsp_hit-from>
      <Hsp_hit-to>36831</Hsp_hit-to>
      <Hsp_query-frame>1</Hsp_query-frame>
      <Hsp_hit-frame>-1</Hsp_hit-frame>
      <Hsp_identity>25</Hsp_identity>
      <Hsp_positive>25</Hsp_positive>
      <Hsp_gaps>0</Hsp_gaps>
      <Hsp_align-len>27</Hsp_align-len>
      <Hsp_qseq>ATCGCTTCTCGGCCTTTTGGCTAAGAT</Hsp_qseq>
      <Hsp_hseq>ATCGCTTCTCGGCCTTTTGGCCGAGAT</Hsp_hseq>
      <Hsp_midline>|||||||||||||||||||||  ||||</Hsp_midline>
    </Hsp>
  </Hit_hsps>
</Hit>
<Hit>
  <Hit_num>18</Hit_num>
  <Hit_id>gi|156366346|ref|NW_001834208.1|</Hit_id>
  <Hit_def>Nematostella vectensis NEMVEscaffold_206 genomic scaffold, whole genome shotgun sequence</Hit_def>
  <Hit_accession>NW_001834208</Hit_accession>
  <Hit_len>431265</Hit_len>
  <Hit_hsps>
    <Hsp>
      <Hsp_num>1</Hsp_num>
      <Hsp_bit-score>147.359</Hsp_bit-score>
      <Hsp_score>162</Hsp_score>
      <Hsp_evalue>2.54083e-33</Hsp_evalue>
      <Hsp_query-from>1</Hsp_query-from>
      <Hsp_query-to>173</Hsp_query-to>
      <Hsp_hit-from>213405</Hsp_hit-from>
      <Hsp_hit-to>213579</Hsp_hit-to>
      <Hsp_query-frame>1</Hsp_query-frame>
      <Hsp_hit-frame>1</Hsp_hit-frame>
      <Hsp_identity>139</Hsp_identity>
      <Hsp_positive>139</Hsp_positive>
      <Hsp_gaps>2</Hsp_gaps>
      <Hsp_align-len>175</Hsp_align-len>
      <Hsp_qseq>ATCGCTTCTCGGCCTTTTGGCTAAGATCAAGTGTAGTATCTGTTCTTATCAGTTTAATATCTGATACG-TCCTCTATCCGAGGACAATATATTAAATGGATTTTTGGAGCAGGGAGATGGAAT-AGGAGCTTGCTCTGTCCACTCCACGCATCGACCTGGTATTGCAGTACCTCC</Hsp_qseq>
      <Hsp_hseq>ATCGCTTCTCGGCCTTTTGGCTAAGATCAAGTGTAGTATCTGTTCTTATCAGCTTAATATCTGATACGCTGCTCATTGAGTAGCTCATATATTAAACTGATTTTTGGAAACTGGCTGTGGAATAAGCGGCTTGCTGCGTCCCAGCCACGGGTTGTCTCGGTATTGCACTACCTCC</Hsp_hseq>
      <Hsp_midline>|||||||||||||||||||||||||||||||||||||||||||||||||||| ||||||||||||||| | |||  |  |  |   ||||||||||  ||||||||||    ||   |||||| ||  |||||||  ||||   |||||  | | |  ||||||||| |||||||</Hsp_midline>
    </Hsp>
  </Hit_hsps>
</Hit>
<Hit>
  <Hit_num>19</Hit_num>
  <Hit_id>gi|156365085|ref|NW_001834194.1|</Hit_id>
  <Hit_def>Nematostella vectensis NEMVEscaffold_220 genomic scaffold, whole genome shotgun sequence</Hit_def>
  <Hit_accession>NW_001834194</Hit_accession>
  <Hit_len>399918</Hit_len>
  <Hit_hsps>
    <Hsp>
      <Hsp_num>1</Hsp_num>
      <Hsp_bit-score>147.359</Hsp_bit-score>
      <Hsp_score>162</Hsp_score>
      <Hsp_evalue>2.54083e-33</Hsp_evalue>
      <Hsp_query-from>1</Hsp_query-from>
      <Hsp_query-to>173</Hsp_query-to>
      <Hsp_hit-from>374004</Hsp_hit-from>
      <Hsp_hit-to>374178</Hsp_hit-to>
      <Hsp_query-frame>1</Hsp_query-frame>
      <Hsp_hit-frame>1</Hsp_hit-frame>
      <Hsp_identity>139</Hsp_identity>
      <Hsp_positive>139</Hsp_positive>
      <Hsp_gaps>2</Hsp_gaps>
      <Hsp_align-len>175</Hsp_align-len>
      <Hsp_qseq>ATCGCTTCTCGGCCTTTTGGCTAAGATCAAGTGTAGTATCTGTTCTTATCAGTTTAATATCTGATACG-TCCTCTATCCGAGGACAATATATTAAATGGATTTTTGGAGCAGGGAGATGGAAT-AGGAGCTTGCTCTGTCCACTCCACGCATCGACCTGGTATTGCAGTACCTCC</Hsp_qseq>
      <Hsp_hseq>ATCGCTTCTCGGCCTTTTGGCTAAGATCAAGTGTAGTATCTGTTCTTATCAGCTTAATATCTGATACGCTGCTCATTGAGTAGCTCATATATTAAACTGATTTTTGGAAACTGGCTGTGGAATAAGCGGCTTGCTGCGTCCCAGCCACGGGTTGTCTCGGTATTGCACTACCTCC</Hsp_hseq>
      <Hsp_midline>|||||||||||||||||||||||||||||||||||||||||||||||||||| ||||||||||||||| | |||  |  |  |   ||||||||||  ||||||||||    ||   |||||| ||  |||||||  ||||   |||||  | | |  ||||||||| |||||||</Hsp_midline>
    </Hsp>
    <Hsp>
      <Hsp_num>2</Hsp_num>
      <Hsp_bit-score>147.359</Hsp_bit-score>
      <Hsp_score>162</Hsp_score>
      <Hsp_evalue>2.54083e-33</Hsp_evalue>
      <Hsp_query-from>1</Hsp_query-from>
      <Hsp_query-to>173</Hsp_query-to>
      <Hsp_hit-from>375708</Hsp_hit-from>
      <Hsp_hit-to>375882</Hsp_hit-to>
      <Hsp_query-frame>1</Hsp_query-frame>
      <Hsp_hit-frame>1</Hsp_hit-frame>
      <Hsp_identity>139</Hsp_identity>
      <Hsp_positive>139</Hsp_positive>
      <Hsp_gaps>2</Hsp_gaps>
      <Hsp_align-len>175</Hsp_align-len>
      <Hsp_qseq>ATCGCTTCTCGGCCTTTTGGCTAAGATCAAGTGTAGTATCTGTTCTTATCAGTTTAATATCTGATACG-TCCTCTATCCGAGGACAATATATTAAATGGATTTTTGGAGCAGGGAGATGGAAT-AGGAGCTTGCTCTGTCCACTCCACGCATCGACCTGGTATTGCAGTACCTCC</Hsp_qseq>
      <Hsp_hseq>ATCGCTTCTCGGCCTTTTGGCTAAGATCAAGTGTAGTATCTGTTCTTATCAGCTTAATATCTGATACGCTGCTCATTGAGTAGCTCATATATTAAACTGATTTTTGGAAACTGGCTGTGGAATAAGCGGCTTGCTGCGTCCCAGCCACGGGTTGTCTCGGTATTGCACTACCTCC</Hsp_hseq>
      <Hsp_midline>|||||||||||||||||||||||||||||||||||||||||||||||||||| ||||||||||||||| | |||  |  |  |   ||||||||||  ||||||||||    ||   |||||| ||  |||||||  ||||   |||||  | | |  ||||||||| |||||||</Hsp_midline>
    </Hsp>
  </Hit_hsps>
</Hit>
<Hit>
  <Hit_num>20</Hit_num>
  <Hit_id>gi|156349245|ref|NW_001833685.1|</Hit_id>
  <Hit_def>Nematostella vectensis NEMVEscaffold_729 genomic scaffold, whole genome shotgun sequence</Hit_def>
  <Hit_accession>NW_001833685</Hit_accession>
  <Hit_len>56187</Hit_len>
  <Hit_hsps>
    <Hsp>
      <Hsp_num>1</Hsp_num>
      <Hsp_bit-score>147.359</Hsp_bit-score>
      <Hsp_score>162</Hsp_score>
      <Hsp_evalue>2.54083e-33</Hsp_evalue>
      <Hsp_query-from>1</Hsp_query-from>
      <Hsp_query-to>173</Hsp_query-to>
      <Hsp_hit-from>14119</Hsp_hit-from>
      <Hsp_hit-to>13945</Hsp_hit-to>
      <Hsp_query-frame>1</Hsp_query-frame>
      <Hsp_hit-frame>-1</Hsp_hit-frame>
      <Hsp_identity>139</Hsp_identity>
      <Hsp_positive>139</Hsp_positive>
      <Hsp_gaps>2</Hsp_gaps>
      <Hsp_align-len>175</Hsp_align-len>
      <Hsp_qseq>ATCGCTTCTCGGCCTTTTGGCTAAGATCAAGTGTAGTATCTGTTCTTATCAGTTTAATATCTGATACG-TCCTCTATCCGAGGACAATATATTAAATGGATTTTTGGAGCAGGGAGATGGAAT-AGGAGCTTGCTCTGTCCACTCCACGCATCGACCTGGTATTGCAGTACCTCC</Hsp_qseq>
      <Hsp_hseq>ATCGCTTCTCGGCCTTTTGGCTAAGATCAAGTGTAGTATCTGTTCTTATCAGCTTAATATCTGATACGCTGCTCATTGAGTAGCTCATATATTAAACTGATTTTTGGAAACTGGCTGTGGAATAAGCGGCTTGCTGCGTCCCAGCCACGGGTTGTCTCGGTATTGCACTACCTCC</Hsp_hseq>
      <Hsp_midline>|||||||||||||||||||||||||||||||||||||||||||||||||||| ||||||||||||||| | |||  |  |  |   ||||||||||  ||||||||||    ||   |||||| ||  |||||||  ||||   |||||  | | |  ||||||||| |||||||</Hsp_midline>
    </Hsp>
    <Hsp>
      <Hsp_num>2</Hsp_num>
      <Hsp_bit-score>147.359</Hsp_bit-score>
      <Hsp_score>162</Hsp_score>
      <Hsp_evalue>2.54083e-33</Hsp_evalue>
      <Hsp_query-from>1</Hsp_query-from>
      <Hsp_query-to>173</Hsp_query-to>
      <Hsp_hit-from>19675</Hsp_hit-from>
      <Hsp_hit-to>19501</Hsp_hit-to>
      <Hsp_query-frame>1</Hsp_query-frame>
      <Hsp_hit-frame>-1</Hsp_hit-frame>
      <Hsp_identity>139</Hsp_identity>
      <Hsp_positive>139</Hsp_positive>
      <Hsp_gaps>2</Hsp_gaps>
      <Hsp_align-len>175</Hsp_align-len>
      <Hsp_qseq>ATCGCTTCTCGGCCTTTTGGCTAAGATCAAGTGTAGTATCTGTTCTTATCAGTTTAATATCTGATACG-TCCTCTATCCGAGGACAATATATTAAATGGATTTTTGGAGCAGGGAGATGGAAT-AGGAGCTTGCTCTGTCCACTCCACGCATCGACCTGGTATTGCAGTACCTCC</Hsp_qseq>
      <Hsp_hseq>ATCGCTTCTCGGCCTTTTGGCTAAGATCAAGTGTAGTATCTGTTCTTATCAGCTTAATATCTGATACGCTGCTCATTGAGTAGCTCATATATTAAACTGATTTTTGGAAACTGGCTGTGGAATAAGCGGCTTGCTGCGTCCCAGCCACGGGTTGTCTCGGTATTGCACTACCTCC</Hsp_hseq>
      <Hsp_midline>|||||||||||||||||||||||||||||||||||||||||||||||||||| ||||||||||||||| | |||  |  |  |   ||||||||||  ||||||||||    ||   |||||| ||  |||||||  ||||   |||||  | | |  ||||||||| |||||||</Hsp_midline>
    </Hsp>
  </Hit_hsps>
</Hit>
<Hit>
  <Hit_num>21</Hit_num>
  <Hit_id>gi|156338745|ref|NW_001831544.1|</Hit_id>
  <Hit_def>Nematostella vectensis NEMVEscaffold_2994 genomic scaffold, whole genome shotgun sequence</Hit_def>
  <Hit_accession>NW_001831544</Hit_accession>
  <Hit_len>9996</Hit_len>
  <Hit_hsps>
    <Hsp>
      <Hsp_num>1</Hsp_num>
      <Hsp_bit-score>147.359</Hsp_bit-score>
      <Hsp_score>162</Hsp_score>
      <Hsp_evalue>2.54083e-33</Hsp_evalue>
      <Hsp_query-from>1</Hsp_query-from>
      <Hsp_query-to>173</Hsp_query-to>
      <Hsp_hit-from>4919</Hsp_hit-from>
      <Hsp_hit-to>4745</Hsp_hit-to>
      <Hsp_query-frame>1</Hsp_query-frame>
      <Hsp_hit-frame>-1</Hsp_hit-frame>
      <Hsp_identity>139</Hsp_identity>
      <Hsp_positive>139</Hsp_positive>
      <Hsp_gaps>2</Hsp_gaps>
      <Hsp_align-len>175</Hsp_align-len>
      <Hsp_qseq>ATCGCTTCTCGGCCTTTTGGCTAAGATCAAGTGTAGTATCTGTTCTTATCAGTTTAATATCTGATACG-TCCTCTATCCGAGGACAATATATTAAATGGATTTTTGGAGCAGGGAGATGGAAT-AGGAGCTTGCTCTGTCCACTCCACGCATCGACCTGGTATTGCAGTACCTCC</Hsp_qseq>
      <Hsp_hseq>ATCGCTTCTCGGCCTTTTGGCTAAGATCAAGTGTAGTATCTGTTCTTATCAGCTTAATATCTGATACGCTGCTCATTGAGTAGCTCATATATTAAACTGATTTTTGGAAACTGGCTGTGGAATAAGCGGCTTGCTGCGTCCCAGCCACGGGTTGTCTCGGTATTGCACTACCTCC</Hsp_hseq>
      <Hsp_midline>|||||||||||||||||||||||||||||||||||||||||||||||||||| ||||||||||||||| | |||  |  |  |   ||||||||||  ||||||||||    ||   |||||| ||  |||||||  ||||   |||||  | | |  ||||||||| |||||||</Hsp_midline>
    </Hsp>
    <Hsp>
      <Hsp_num>2</Hsp_num>
      <Hsp_bit-score>147.359</Hsp_bit-score>
      <Hsp_score>162</Hsp_score>
      <Hsp_evalue>2.54083e-33</Hsp_evalue>
      <Hsp_query-from>1</Hsp_query-from>
      <Hsp_query-to>173</Hsp_query-to>
      <Hsp_hit-from>8587</Hsp_hit-from>
      <Hsp_hit-to>8413</Hsp_hit-to>
      <Hsp_query-frame>1</Hsp_query-frame>
      <Hsp_hit-frame>-1</Hsp_hit-frame>
      <Hsp_identity>139</Hsp_identity>
      <Hsp_positive>139</Hsp_positive>
      <Hsp_gaps>2</Hsp_gaps>
      <Hsp_align-len>175</Hsp_align-len>
      <Hsp_qseq>ATCGCTTCTCGGCCTTTTGGCTAAGATCAAGTGTAGTATCTGTTCTTATCAGTTTAATATCTGATACG-TCCTCTATCCGAGGACAATATATTAAATGGATTTTTGGAGCAGGGAGATGGAAT-AGGAGCTTGCTCTGTCCACTCCACGCATCGACCTGGTATTGCAGTACCTCC</Hsp_qseq>
      <Hsp_hseq>ATCGCTTCTCGGCCTTTTGGCTAAGATCAAGTGTAGTATCTGTTCTTATCAGCTTAATATCTGATACGCTGCTCATTGAGTAGCTCATATATTAAACTGATTTTTGGAAACTGGCTGTGGAATAAGCGGCTTGCTGCGTCCCAGCCACGGGTTGTCTCGGTATTGCACTACCTCC</Hsp_hseq>
      <Hsp_midline>|||||||||||||||||||||||||||||||||||||||||||||||||||| ||||||||||||||| | |||  |  |  |   ||||||||||  ||||||||||    ||   |||||| ||  |||||||  ||||   |||||  | | |  ||||||||| |||||||</Hsp_midline>
    </Hsp>
    <Hsp>
      <Hsp_num>3</Hsp_num>
      <Hsp_bit-score>129.325</Hsp_bit-score>
      <Hsp_score>142</Hsp_score>
      <Hsp_evalue>6.81798e-28</Hsp_evalue>
      <Hsp_query-from>1</Hsp_query-from>
      <Hsp_query-to>107</Hsp_query-to>
      <Hsp_hit-from>136</Hsp_hit-from>
      <Hsp_hit-to>29</Hsp_hit-to>
      <Hsp_query-frame>1</Hsp_query-frame>
      <Hsp_hit-frame>-1</Hsp_hit-frame>
      <Hsp_identity>94</Hsp_identity>
      <Hsp_positive>94</Hsp_positive>
      <Hsp_gaps>1</Hsp_gaps>
      <Hsp_align-len>108</Hsp_align-len>
      <Hsp_qseq>ATCGCTTCTCGGCCTTTTGGCTAAGATCAAGTGTAGTATCTGTTCTTATCAGTTTAATATCTGATACG-TCCTCTATCCGAGGACAATATATTAAATGGATTTTTGGA</Hsp_qseq>
      <Hsp_hseq>ATCGCTTCTCGGCCTTTTGGCTAAGATCAAGTGTAGTATCTGTTCTTATCAGCTTAATATCTGATACGCTGCTCATTGAGTAGCTCATATATTAAACTGATTTTTGGA</Hsp_hseq>
      <Hsp_midline>|||||||||||||||||||||||||||||||||||||||||||||||||||| ||||||||||||||| | |||  |  |  |   ||||||||||  ||||||||||</Hsp_midline>
    </Hsp>
    <Hsp>
      <Hsp_num>4</Hsp_num>
      <Hsp_bit-score>129.325</Hsp_bit-score>
      <Hsp_score>142</Hsp_score>
      <Hsp_evalue>6.81798e-28</Hsp_evalue>
      <Hsp_query-from>1</Hsp_query-from>
      <Hsp_query-to>173</Hsp_query-to>
      <Hsp_hit-from>1832</Hsp_hit-from>
      <Hsp_hit-to>1662</Hsp_hit-to>
      <Hsp_query-frame>1</Hsp_query-frame>
      <Hsp_hit-frame>-1</Hsp_hit-frame>
      <Hsp_identity>135</Hsp_identity>
      <Hsp_positive>135</Hsp_positive>
      <Hsp_gaps>4</Hsp_gaps>
      <Hsp_align-len>174</Hsp_align-len>
      <Hsp_qseq>ATCGCTTCTCGGCCTTTTGGCTAAGATCAAGTGTAGTATCTGTTCTTATCAGTTTAATATCTGATACG-TCCTCTATCCGAGGACAATATATTAAATGGATTTTTGGAGCAGGGAGATGGAATAGGAGCTTGCTCTGTCCACTCCACGCATCGACCTGGTATTGCAGTACCTCC</Hsp_qseq>
      <Hsp_hseq>ATCGCTTCTCGGCCTTTTGGCTAAGATCAAGTGTAGTATCTGTTCTTATCAGCTTAATATCTGATACGCTGCTCATTGAGTAGCTCATATATTAAACTGA-TTTTGAAACTGGCTG--GGAATAAGCGGCTGCTGCGTTCCAGCCACGGGTTGTCTCGGTATTGCACTACCTCC</Hsp_hseq>
      <Hsp_midline>|||||||||||||||||||||||||||||||||||||||||||||||||||| ||||||||||||||| | |||  |  |  |   ||||||||||  || ||||| | | ||  |  |||||| | |  ||||  || |   |||||  | | |  ||||||||| |||||||</Hsp_midline>
    </Hsp>
  </Hit_hsps>
</Hit>
<Hit>
  <Hit_num>22</Hit_num>
  <Hit_id>gi|156326708|ref|NW_001828443.1|</Hit_id>
  <Hit_def>Nematostella vectensis NEMVEscaffold_6614 genomic scaffold, whole genome shotgun sequence</Hit_def>
  <Hit_accession>NW_001828443</Hit_accession>
  <Hit_len>6611</Hit_len>
  <Hit_hsps>
    <Hsp>
      <Hsp_num>1</Hsp_num>
      <Hsp_bit-score>147.359</Hsp_bit-score>
      <Hsp_score>162</Hsp_score>
      <Hsp_evalue>2.54083e-33</Hsp_evalue>
      <Hsp_query-from>1</Hsp_query-from>
      <Hsp_query-to>173</Hsp_query-to>
      <Hsp_hit-from>6479</Hsp_hit-from>
      <Hsp_hit-to>6305</Hsp_hit-to>
      <Hsp_query-frame>1</Hsp_query-frame>
      <Hsp_hit-frame>-1</Hsp_hit-frame>
      <Hsp_identity>139</Hsp_identity>
      <Hsp_positive>139</Hsp_positive>
      <Hsp_gaps>2</Hsp_gaps>
      <Hsp_align-len>175</Hsp_align-len>
      <Hsp_qseq>ATCGCTTCTCGGCCTTTTGGCTAAGATCAAGTGTAGTATCTGTTCTTATCAGTTTAATATCTGATACG-TCCTCTATCCGAGGACAATATATTAAATGGATTTTTGGAGCAGGGAGATGGAAT-AGGAGCTTGCTCTGTCCACTCCACGCATCGACCTGGTATTGCAGTACCTCC</Hsp_qseq>
      <Hsp_hseq>ATCGCTTCTCGGCCTTTTGGCTAAGATCAAGTGTAGTATCTGTTCTTATCAGCTTAATATCTGATACGCTGCTCATTGAGTAGCTCATATATTAAACTGATTTTTGGAAACTGGCTGTGGAATAAGCGGCTTGCTGCGTCCCAGCCACGGGTTGTCTCGGTATTGCACTACCTCC</Hsp_hseq>
      <Hsp_midline>|||||||||||||||||||||||||||||||||||||||||||||||||||| ||||||||||||||| | |||  |  |  |   ||||||||||  ||||||||||    ||   |||||| ||  |||||||  ||||   |||||  | | |  ||||||||| |||||||</Hsp_midline>
    </Hsp>
    <Hsp>
      <Hsp_num>2</Hsp_num>
      <Hsp_bit-score>146.457</Hsp_bit-score>
      <Hsp_score>161</Hsp_score>
      <Hsp_evalue>8.86835e-33</Hsp_evalue>
      <Hsp_query-from>1</Hsp_query-from>
      <Hsp_query-to>173</Hsp_query-to>
      <Hsp_hit-from>233</Hsp_hit-from>
      <Hsp_hit-to>58</Hsp_hit-to>
      <Hsp_query-frame>1</Hsp_query-frame>
      <Hsp_hit-frame>-1</Hsp_hit-frame>
      <Hsp_identity>139</Hsp_identity>
      <Hsp_positive>139</Hsp_positive>
      <Hsp_gaps>3</Hsp_gaps>
      <Hsp_align-len>176</Hsp_align-len>
      <Hsp_qseq>ATCGCTTCTCGGCCTTTTGGCTAAGATCAAGTGTAGTATCTGTTCTTATCAGTTTAATATCTGATACG-TCCTCTATCCGAGGACAATATATTAAATGGATTTTTGGAGCAGGGAGATGGAATAGGA--GCTTGCTCTGTCCACTCCACGCATCGACCTGGTATTGCAGTACCTCC</Hsp_qseq>
      <Hsp_hseq>ATCGCTTCTCGGCCTTTTGGCTAAGATCAAGTGTAGTATCTGTTCTTATCAGCTTAATATCTGATACGCTGCTCATTGAGTAGCTCATATATTAAACTGATTTTTGGAAACTGGCTGTGGAATAAGNCGGCTTGCTGCGTCCCAGCCACGGGTTGTCTCGGTATTGCACTACCTCC</Hsp_hseq>
      <Hsp_midline>|||||||||||||||||||||||||||||||||||||||||||||||||||| ||||||||||||||| | |||  |  |  |   ||||||||||  ||||||||||    ||   ||||||| |   |||||||  ||||   |||||  | | |  ||||||||| |||||||</Hsp_midline>
    </Hsp>
  </Hit_hsps>
</Hit>
<Hit>
  <Hit_num>23</Hit_num>
  <Hit_id>gi|156390874|ref|NW_001834366.1|</Hit_id>
  <Hit_def>Nematostella vectensis NEMVEscaffold_48 genomic scaffold, whole genome shotgun sequence</Hit_def>
  <Hit_accession>NW_001834366</Hit_accession>
  <Hit_len>1166239</Hit_len>
  <Hit_hsps>
    <Hsp>
      <Hsp_num>1</Hsp_num>
      <Hsp_bit-score>147.359</Hsp_bit-score>
      <Hsp_score>162</Hsp_score>
      <Hsp_evalue>2.54083e-33</Hsp_evalue>
      <Hsp_query-from>1</Hsp_query-from>
      <Hsp_query-to>173</Hsp_query-to>
      <Hsp_hit-from>1092055</Hsp_hit-from>
      <Hsp_hit-to>1091881</Hsp_hit-to>
      <Hsp_query-frame>1</Hsp_query-frame>
      <Hsp_hit-frame>-1</Hsp_hit-frame>
      <Hsp_identity>139</Hsp_identity>
      <Hsp_positive>139</Hsp_positive>
      <Hsp_gaps>2</Hsp_gaps>
      <Hsp_align-len>175</Hsp_align-len>
      <Hsp_qseq>ATCGCTTCTCGGCCTTTTGGCTAAGATCAAGTGTAGTATCTGTTCTTATCAGTTTAATATCTGATACG-TCCTCTATCCGAGGACAATATATTAAATGGATTTTTGGAGCAGGGAGATGGAAT-AGGAGCTTGCTCTGTCCACTCCACGCATCGACCTGGTATTGCAGTACCTCC</Hsp_qseq>
      <Hsp_hseq>ATCGCTTCTCGGCCTTTTGGCTAAGATCAAGTGTAGTATCTGTTCTTATCAGCTTAATATCTGATACGCTGCTCATTGAGTAGCTCATATATTAAACTGATTTTTGGAAACTGGCTGTGGAATAAGCGGCTTGCTGCGTCCCAGCCACGGGTTGTCTCGGTATTGCACTACCTCC</Hsp_hseq>
      <Hsp_midline>|||||||||||||||||||||||||||||||||||||||||||||||||||| ||||||||||||||| | |||  |  |  |   ||||||||||  ||||||||||    ||   |||||| ||  |||||||  ||||   |||||  | | |  ||||||||| |||||||</Hsp_midline>
    </Hsp>
    <Hsp>
      <Hsp_num>2</Hsp_num>
      <Hsp_bit-score>91.4547</Hsp_bit-score>
      <Hsp_score>100</Hsp_score>
      <Hsp_evalue>1.71351e-16</Hsp_evalue>
      <Hsp_query-from>1</Hsp_query-from>
      <Hsp_query-to>50</Hsp_query-to>
      <Hsp_hit-from>1102218</Hsp_hit-from>
      <Hsp_hit-to>1102169</Hsp_hit-to>
      <Hsp_query-frame>1</Hsp_query-frame>
      <Hsp_hit-frame>-1</Hsp_hit-frame>
      <Hsp_identity>50</Hsp_identity>
      <Hsp_positive>50</Hsp_positive>
      <Hsp_gaps>0</Hsp_gaps>
      <Hsp_align-len>50</Hsp_align-len>
      <Hsp_qseq>ATCGCTTCTCGGCCTTTTGGCTAAGATCAAGTGTAGTATCTGTTCTTATC</Hsp_qseq>
      <Hsp_hseq>ATCGCTTCTCGGCCTTTTGGCTAAGATCAAGTGTAGTATCTGTTCTTATC</Hsp_hseq>
      <Hsp_midline>||||||||||||||||||||||||||||||||||||||||||||||||||</Hsp_midline>
    </Hsp>
    <Hsp>
      <Hsp_num>3</Hsp_num>
      <Hsp_bit-score>87.848</Hsp_bit-score>
      <Hsp_score>96</Hsp_score>
      <Hsp_evalue>2.08748e-15</Hsp_evalue>
      <Hsp_query-from>1</Hsp_query-from>
      <Hsp_query-to>48</Hsp_query-to>
      <Hsp_hit-from>1124176</Hsp_hit-from>
      <Hsp_hit-to>1124129</Hsp_hit-to>
      <Hsp_query-frame>1</Hsp_query-frame>
      <Hsp_hit-frame>-1</Hsp_hit-frame>
      <Hsp_identity>48</Hsp_identity>
      <Hsp_positive>48</Hsp_positive>
      <Hsp_gaps>0</Hsp_gaps>
      <Hsp_align-len>48</Hsp_align-len>
      <Hsp_qseq>ATCGCTTCTCGGCCTTTTGGCTAAGATCAAGTGTAGTATCTGTTCTTA</Hsp_qseq>
      <Hsp_hseq>ATCGCTTCTCGGCCTTTTGGCTAAGATCAAGTGTAGTATCTGTTCTTA</Hsp_hseq>
      <Hsp_midline>||||||||||||||||||||||||||||||||||||||||||||||||</Hsp_midline>
    </Hsp>
    <Hsp>
      <Hsp_num>4</Hsp_num>
      <Hsp_bit-score>86.0446</Hsp_bit-score>
      <Hsp_score>94</Hsp_score>
      <Hsp_evalue>7.28602e-15</Hsp_evalue>
      <Hsp_query-from>35</Hsp_query-from>
      <Hsp_query-to>173</Hsp_query-to>
      <Hsp_hit-from>1095964</Hsp_hit-from>
      <Hsp_hit-to>1095824</Hsp_hit-to>
      <Hsp_query-frame>1</Hsp_query-frame>
      <Hsp_hit-frame>-1</Hsp_hit-frame>
      <Hsp_identity>105</Hsp_identity>
      <Hsp_positive>105</Hsp_positive>
      <Hsp_gaps>2</Hsp_gaps>
      <Hsp_align-len>141</Hsp_align-len>
      <Hsp_qseq>AGTATCTGTTCTTATCAGTTTAATATCTGATACG-TCCTCTATCCGAGGACAATATATTAAATGGATTTTTGGAGCAGGGAGATGGAAT-AGGAGCTTGCTCTGTCCACTCCACGCATCGACCTGGTATTGCAGTACCTCC</Hsp_qseq>
      <Hsp_hseq>AGTATCTGTTCTTATCAGCTTAATATCTGATACGCTGCTCATTGAGTAGCTCATATATTAAACTGATTTTTGGAAACTGGCTGTGGAATAAGCGGCTTGCTGCGTCCCAGCCACGGGTTGTCTCGGTATTGCACTACCTCC</Hsp_hseq>
      <Hsp_midline>|||||||||||||||||| ||||||||||||||| | |||  |  |  |   ||||||||||  ||||||||||    ||   |||||| ||  |||||||  ||||   |||||  | | |  ||||||||| |||||||</Hsp_midline>
    </Hsp>
  </Hit_hsps>
</Hit>
<Hit>
  <Hit_num>24</Hit_num>
  <Hit_id>gi|156322091|ref|NW_001827341.1|</Hit_id>
  <Hit_def>Nematostella vectensis NEMVEscaffold_8096 genomic scaffold, whole genome shotgun sequence</Hit_def>
  <Hit_accession>NW_001827341</Hit_accession>
  <Hit_len>3611</Hit_len>
  <Hit_hsps>
    <Hsp>
      <Hsp_num>1</Hsp_num>
      <Hsp_bit-score>135.637</Hsp_bit-score>
      <Hsp_score>149</Hsp_score>
      <Hsp_evalue>1.60344e-29</Hsp_evalue>
      <Hsp_query-from>1</Hsp_query-from>
      <Hsp_query-to>164</Hsp_query-to>
      <Hsp_hit-from>3446</Hsp_hit-from>
      <Hsp_hit-to>3611</Hsp_hit-to>
      <Hsp_query-frame>1</Hsp_query-frame>
      <Hsp_hit-frame>1</Hsp_hit-frame>
      <Hsp_identity>131</Hsp_identity>
      <Hsp_positive>131</Hsp_positive>
      <Hsp_gaps>2</Hsp_gaps>
      <Hsp_align-len>166</Hsp_align-len>
      <Hsp_qseq>ATCGCTTCTCGGCCTTTTGGCTAAGATCAAGTGTAGTATCTGTTCTTATCAGTTTAATATCTGATACG-TCCTCTATCCGAGGACAATATATTAAATGGATTTTTGGAGCAGGGAGATGGAAT-AGGAGCTTGCTCTGTCCACTCCACGCATCGACCTGGTATTGC</Hsp_qseq>
      <Hsp_hseq>ATCGCTTCTCGGCCTTTTGGCTAAGATCAAGTGTAGTATCTGTTCTTATCAGCTTAATATCTGATACGCTGCTCATTGAGTAGCTCATATATTAAACTGATTTTTGGAAACTGGCTGTGGAATAAGCGGCTTGCTGCGTCCCAGCCACGGGTTGTCTCGGTATTGC</Hsp_hseq>
      <Hsp_midline>|||||||||||||||||||||||||||||||||||||||||||||||||||| ||||||||||||||| | |||  |  |  |   ||||||||||  ||||||||||    ||   |||||| ||  |||||||  ||||   |||||  | | |  ||||||||</Hsp_midline>
    </Hsp>
  </Hit_hsps>
</Hit>
<Hit>
  <Hit_num>25</Hit_num>
  <Hit_id>gi|156405776|ref|NW_001834408.1|</Hit_id>
  <Hit_def>Nematostella vectensis NEMVEscaffold_6 genomic scaffold, whole genome shotgun sequence</Hit_def>
  <Hit_accession>NW_001834408</Hit_accession>
  <Hit_len>2383264</Hit_len>
  <Hit_hsps>
    <Hsp>
      <Hsp_num>1</Hsp_num>
      <Hsp_bit-score>132.031</Hsp_bit-score>
      <Hsp_score>145</Hsp_score>
      <Hsp_evalue>1.95338e-28</Hsp_evalue>
      <Hsp_query-from>1</Hsp_query-from>
      <Hsp_query-to>147</Hsp_query-to>
      <Hsp_hit-from>1620146</Hsp_hit-from>
      <Hsp_hit-to>1619998</Hsp_hit-to>
      <Hsp_query-frame>1</Hsp_query-frame>
      <Hsp_hit-frame>-1</Hsp_hit-frame>
      <Hsp_identity>120</Hsp_identity>
      <Hsp_positive>120</Hsp_positive>
      <Hsp_gaps>2</Hsp_gaps>
      <Hsp_align-len>149</Hsp_align-len>
      <Hsp_qseq>ATCGCTTCTCGGCCTTTTGGCTAAGATCAAGTGTAGTATCTGTTCTTATCAGTTTAATATCTGATACG-TCCTCTATCCGAGGACAATATATTAAATGGATTTTTGGAGCAGGGAGATGGAAT-AGGAGCTTGCTCTGTCCACTCCACG</Hsp_qseq>
      <Hsp_hseq>ATCGCTTCTCGGCCTTTTGGCTAAGATCAAGTGTAGTATCTGTTCTTATCAGCTTAATATCTGATACGCTGCTCATTGAGTAGCTCATATATTAAACTGATTTTTGGAAACTGGCTGTGGAATAAGCGGCTTGCTGCGTCCCAGCCACG</Hsp_hseq>
      <Hsp_midline>|||||||||||||||||||||||||||||||||||||||||||||||||||| ||||||||||||||| | |||  |  |  |   ||||||||||  ||||||||||    ||   |||||| ||  |||||||  ||||   |||||</Hsp_midline>
    </Hsp>
  </Hit_hsps>
</Hit>
<Hit>
  <Hit_num>26</Hit_num>
  <Hit_id>gi|1004128457|ref|NW_015441114.1|</Hit_id>
  <Hit_def>Acropora digitifera unplaced genomic scaffold, Adig_1.1 DF970749.1</Hit_def>
  <Hit_accession>NW_015441114</Hit_accession>
  <Hit_len>1020939</Hit_len>
  <Hit_hsps>
    <Hsp>
      <Hsp_num>1</Hsp_num>
      <Hsp_bit-score>132.031</Hsp_bit-score>
      <Hsp_score>145</Hsp_score>
      <Hsp_evalue>1.95338e-28</Hsp_evalue>
      <Hsp_query-from>4</Hsp_query-from>
      <Hsp_query-to>174</Hsp_query-to>
      <Hsp_hit-from>832251</Hsp_hit-from>
      <Hsp_hit-to>832080</Hsp_hit-to>
      <Hsp_query-frame>1</Hsp_query-frame>
      <Hsp_hit-frame>-1</Hsp_hit-frame>
      <Hsp_identity>133</Hsp_identity>
      <Hsp_positive>133</Hsp_positive>
      <Hsp_gaps>1</Hsp_gaps>
      <Hsp_align-len>172</Hsp_align-len>
      <Hsp_qseq>GCTTCTCGGCCTTTTGGCTAAGATCAAGTGTAGTATCTGTTCTTATCAGTTTAATATCTGATACG-TCCTCTATCCGAGGACAATATATTAAATGGATTTTTGGAGCAGGGAGATGGAATAGGAGCTTGCTCTGTCCACTCCACGCATCGACCTGGTATTGCAGTACCTCCA</Hsp_qseq>
      <Hsp_hseq>GCTTCTCGGTTTTTTGGCTAAGATCAAGTGTAGTGTCTGTTCTTATCAGCTTAATATCTGATACGCTGCTCATTGAGCAGCTCATATATTAAACTGATTTTTGGAACCGGGCTGTGGAAAAGAGGCTTGCCTCGTCCCAGCCACGGGTTGCCTCGGTATAGCACTACCTCCA</Hsp_hseq>
      <Hsp_midline>|||||||||  ||||||||||||||||||||||| |||||||||||||| ||||||||||||||| | |||  |  |  |   ||||||||||  |||||||||| | |||   ||||| ||  ||||||   ||||   |||||  | | |  ||||| ||| ||||||||</Hsp_midline>
    </Hsp>
    <Hsp>
      <Hsp_num>2</Hsp_num>
      <Hsp_bit-score>86.9463</Hsp_bit-score>
      <Hsp_score>95</Hsp_score>
      <Hsp_evalue>7.28602e-15</Hsp_evalue>
      <Hsp_query-from>38</Hsp_query-from>
      <Hsp_query-to>188</Hsp_query-to>
      <Hsp_hit-from>847022</Hsp_hit-from>
      <Hsp_hit-to>846871</Hsp_hit-to>
      <Hsp_query-frame>1</Hsp_query-frame>
      <Hsp_hit-frame>-1</Hsp_hit-frame>
      <Hsp_identity>111</Hsp_identity>
      <Hsp_positive>111</Hsp_positive>
      <Hsp_gaps>1</Hsp_gaps>
      <Hsp_align-len>152</Hsp_align-len>
      <Hsp_qseq>ATCTGTTCTTATCAGTTTAATATCTGATACG-TCCTCTATCCGAGGACAATATATTAAATGGATTTTTGGAGCAGGGAGATGGAATAGGAGCTTGCTCTGTCCACTCCACGCATCGACCTGGTATTGCAGTACCTCCAGGACCGGTGCACTT</Hsp_qseq>
      <Hsp_hseq>ATCTGTTCTTATCAGCTTAATATCTGATACGCTGCTCATTGAGCAGCTCATATATTAAACTGATTTTTGGAACCGGGCTGTGGAAAAGAGGCTTGCCTCGTCCCAGCCACGGGTTGCCTCGGTATAGCACTACCTCCAAGCGCGGCCCACTT</Hsp_hseq>
      <Hsp_midline>||||||||||||||| ||||||||||||||| | |||  |  |  |   ||||||||||  |||||||||| | |||   ||||| ||  ||||||   ||||   |||||  | | |  ||||| ||| |||||||| |  |||  |||||</Hsp_midline>
    </Hsp>
  </Hit_hsps>
</Hit>
<Hit>
  <Hit_num>27</Hit_num>
  <Hit_id>gi|1004127720|ref|NW_015441851.1|</Hit_id>
  <Hit_def>Acropora digitifera unplaced genomic scaffold, Adig_1.1 DF971486.1</Hit_def>
  <Hit_accession>NW_015441851</Hit_accession>
  <Hit_len>168310</Hit_len>
  <Hit_hsps>
    <Hsp>
      <Hsp_num>1</Hsp_num>
      <Hsp_bit-score>132.031</Hsp_bit-score>
      <Hsp_score>145</Hsp_score>
      <Hsp_evalue>1.95338e-28</Hsp_evalue>
      <Hsp_query-from>1</Hsp_query-from>
      <Hsp_query-to>121</Hsp_query-to>
      <Hsp_hit-from>64817</Hsp_hit-from>
      <Hsp_hit-to>64938</Hsp_hit-to>
      <Hsp_query-frame>1</Hsp_query-frame>
      <Hsp_hit-frame>1</Hsp_hit-frame>
      <Hsp_identity>103</Hsp_identity>
      <Hsp_positive>103</Hsp_positive>
      <Hsp_gaps>1</Hsp_gaps>
      <Hsp_align-len>122</Hsp_align-len>
      <Hsp_qseq>ATCGCTTCTCGGCCTTTTGGCTAAGATCAAGTGTAGTATCTGTTCTTATCAGTTTAATATCTGATACG-TCCTCTATCCGAGGACAATATATTAAATGGATTTTTGGAGCAGGGAGATGGAA</Hsp_qseq>
      <Hsp_hseq>ATCGCTTCTCGGCCTTTTGGCTAAGATCAAGTGTAGTATCTGTTCTTATCAGCTTAATATCTGATACGCTGCTCATTGAGCAGCTCATATATTAAACTGATTTTTGGAACCGGGCTGTGGAA</Hsp_hseq>
      <Hsp_midline>|||||||||||||||||||||||||||||||||||||||||||||||||||| ||||||||||||||| | |||  |  |  |   ||||||||||  |||||||||| | |||   |||||</Hsp_midline>
    </Hsp>
    <Hsp>
      <Hsp_num>2</Hsp_num>
      <Hsp_bit-score>119.407</Hsp_bit-score>
      <Hsp_score>131</Hsp_score>
      <Hsp_evalue>1.23272e-24</Hsp_evalue>
      <Hsp_query-from>1</Hsp_query-from>
      <Hsp_query-to>68</Hsp_query-to>
      <Hsp_hit-from>105170</Hsp_hit-from>
      <Hsp_hit-to>105103</Hsp_hit-to>
      <Hsp_query-frame>1</Hsp_query-frame>
      <Hsp_hit-frame>-1</Hsp_hit-frame>
      <Hsp_identity>67</Hsp_identity>
      <Hsp_positive>67</Hsp_positive>
      <Hsp_gaps>0</Hsp_gaps>
      <Hsp_align-len>68</Hsp_align-len>
      <Hsp_qseq>ATCGCTTCTCGGCCTTTTGGCTAAGATCAAGTGTAGTATCTGTTCTTATCAGTTTAATATCTGATACG</Hsp_qseq>
      <Hsp_hseq>ATCGCTTCTCGGCCTTTTGGCTAAGATCAAGTGTAGTATCTGTTCTTATCAGCTTAATATCTGATACG</Hsp_hseq>
      <Hsp_midline>|||||||||||||||||||||||||||||||||||||||||||||||||||| |||||||||||||||</Hsp_midline>
    </Hsp>
    <Hsp>
      <Hsp_num>3</Hsp_num>
      <Hsp_bit-score>82.4379</Hsp_bit-score>
      <Hsp_score>90</Hsp_score>
      <Hsp_evalue>8.87619e-14</Hsp_evalue>
      <Hsp_query-from>38</Hsp_query-from>
      <Hsp_query-to>173</Hsp_query-to>
      <Hsp_hit-from>87077</Hsp_hit-from>
      <Hsp_hit-to>87213</Hsp_hit-to>
      <Hsp_query-frame>1</Hsp_query-frame>
      <Hsp_hit-frame>1</Hsp_hit-frame>
      <Hsp_identity>101</Hsp_identity>
      <Hsp_positive>101</Hsp_positive>
      <Hsp_gaps>1</Hsp_gaps>
      <Hsp_align-len>137</Hsp_align-len>
      <Hsp_qseq>ATCTGTTCTTATCAGTTTAATATCTGATACG-TCCTCTATCCGAGGACAATATATTAAATGGATTTTTGGAGCAGGGAGATGGAATAGGAGCTTGCTCTGTCCACTCCACGCATCGACCTGGTATTGCAGTACCTCC</Hsp_qseq>
      <Hsp_hseq>ATCTGTTCTTATCAGCTTAATATCTGATACGCTGCTCATTGAGCAGCTCATATATTAAACTGATTTTTGGAACCGGGCTGTGGAAAAGAGGCTTGCCTCGTCCCAGCCACGGGTTGCCTCGGTATAGCACTACCTCC</Hsp_hseq>
      <Hsp_midline>||||||||||||||| ||||||||||||||| | |||  |  |  |   ||||||||||  |||||||||| | |||   ||||| ||  ||||||   ||||   |||||  | | |  ||||| ||| |||||||</Hsp_midline>
    </Hsp>
    <Hsp>
      <Hsp_num>4</Hsp_num>
      <Hsp_bit-score>82.4379</Hsp_bit-score>
      <Hsp_score>90</Hsp_score>
      <Hsp_evalue>8.87619e-14</Hsp_evalue>
      <Hsp_query-from>38</Hsp_query-from>
      <Hsp_query-to>173</Hsp_query-to>
      <Hsp_hit-from>95125</Hsp_hit-from>
      <Hsp_hit-to>94989</Hsp_hit-to>
      <Hsp_query-frame>1</Hsp_query-frame>
      <Hsp_hit-frame>-1</Hsp_hit-frame>
      <Hsp_identity>101</Hsp_identity>
      <Hsp_positive>101</Hsp_positive>
      <Hsp_gaps>1</Hsp_gaps>
      <Hsp_align-len>137</Hsp_align-len>
      <Hsp_qseq>ATCTGTTCTTATCAGTTTAATATCTGATACG-TCCTCTATCCGAGGACAATATATTAAATGGATTTTTGGAGCAGGGAGATGGAATAGGAGCTTGCTCTGTCCACTCCACGCATCGACCTGGTATTGCAGTACCTCC</Hsp_qseq>
      <Hsp_hseq>ATCTGTTCTTATCAGCTTAATATCTGATACGCTGCTCATTGAGCAGCTCATATATTAAACTGATTTTTGGAACCGGGCTGTGGAAAAGAGGCTTGCCTCGTCCCAGCCACGGGTTGCCTCGGTATAGCACTACCTCC</Hsp_hseq>
      <Hsp_midline>||||||||||||||| ||||||||||||||| | |||  |  |  |   ||||||||||  |||||||||| | |||   ||||| ||  ||||||   ||||   |||||  | | |  ||||| ||| |||||||</Hsp_midline>
    </Hsp>
    <Hsp>
      <Hsp_num>5</Hsp_num>
      <Hsp_bit-score>77.9295</Hsp_bit-score>
      <Hsp_score>85</Hsp_score>
      <Hsp_evalue>3.77425e-12</Hsp_evalue>
      <Hsp_query-from>38</Hsp_query-from>
      <Hsp_query-to>173</Hsp_query-to>
      <Hsp_hit-from>73470</Hsp_hit-from>
      <Hsp_hit-to>73606</Hsp_hit-to>
      <Hsp_query-frame>1</Hsp_query-frame>
      <Hsp_hit-frame>1</Hsp_hit-frame>
      <Hsp_identity>100</Hsp_identity>
      <Hsp_positive>100</Hsp_positive>
      <Hsp_gaps>1</Hsp_gaps>
      <Hsp_align-len>137</Hsp_align-len>
      <Hsp_qseq>ATCTGTTCTTATCAGTTTAATATCTGATACG-TCCTCTATCCGAGGACAATATATTAAATGGATTTTTGGAGCAGGGAGATGGAATAGGAGCTTGCTCTGTCCACTCCACGCATCGACCTGGTATTGCAGTACCTCC</Hsp_qseq>
      <Hsp_hseq>ATCTGTTCTTATCAGCTTAATATCTGATACGCTGCTCATTGAGCAGCTCATATATTAAACTGATTTTTGGAACCGGGCTGTGGAAAAGAGGCTTGCCTCGTCCCAGCCACGGGGTGCCTCGGTATAGCACTACCTCC</Hsp_hseq>
      <Hsp_midline>||||||||||||||| ||||||||||||||| | |||  |  |  |   ||||||||||  |||||||||| | |||   ||||| ||  ||||||   ||||   |||||    | |  ||||| ||| |||||||</Hsp_midline>
    </Hsp>
    <Hsp>
      <Hsp_num>6</Hsp_num>
      <Hsp_bit-score>49.9773</Hsp_bit-score>
      <Hsp_score>54</Hsp_score>
      <Hsp_evalue>0.000524629</Hsp_evalue>
      <Hsp_query-from>38</Hsp_query-from>
      <Hsp_query-to>69</Hsp_query-to>
      <Hsp_hit-from>41692</Hsp_hit-from>
      <Hsp_hit-to>41661</Hsp_hit-to>
      <Hsp_query-frame>1</Hsp_query-frame>
      <Hsp_hit-frame>-1</Hsp_hit-frame>
      <Hsp_identity>30</Hsp_identity>
      <Hsp_positive>30</Hsp_positive>
      <Hsp_gaps>0</Hsp_gaps>
      <Hsp_align-len>32</Hsp_align-len>
      <Hsp_qseq>ATCTGTTCTTATCAGTTTAATATCTGATACGT</Hsp_qseq>
      <Hsp_hseq>ATATGTTCTTATCAGCTTAATATCTGATACGT</Hsp_hseq>
      <Hsp_midline>|| |||||||||||| ||||||||||||||||</Hsp_midline>
    </Hsp>
    <Hsp>
      <Hsp_num>7</Hsp_num>
      <Hsp_bit-score>46.3705</Hsp_bit-score>
      <Hsp_score>50</Hsp_score>
      <Hsp_evalue>0.00639129</Hsp_evalue>
      <Hsp_query-from>1</Hsp_query-from>
      <Hsp_query-to>25</Hsp_query-to>
      <Hsp_hit-from>93148</Hsp_hit-from>
      <Hsp_hit-to>93124</Hsp_hit-to>
      <Hsp_query-frame>1</Hsp_query-frame>
      <Hsp_hit-frame>-1</Hsp_hit-frame>
      <Hsp_identity>25</Hsp_identity>
      <Hsp_positive>25</Hsp_positive>
      <Hsp_gaps>0</Hsp_gaps>
      <Hsp_align-len>25</Hsp_align-len>
      <Hsp_qseq>ATCGCTTCTCGGCCTTTTGGCTAAG</Hsp_qseq>
      <Hsp_hseq>ATCGCTTCTCGGCCTTTTGGCTAAG</Hsp_hseq>
      <Hsp_midline>|||||||||||||||||||||||||</Hsp_midline>
    </Hsp>
    <Hsp>
      <Hsp_num>8</Hsp_num>
      <Hsp_bit-score>46.3705</Hsp_bit-score>
      <Hsp_score>50</Hsp_score>
      <Hsp_evalue>0.00639129</Hsp_evalue>
      <Hsp_query-from>1</Hsp_query-from>
      <Hsp_query-to>25</Hsp_query-to>
      <Hsp_hit-from>100060</Hsp_hit-from>
      <Hsp_hit-to>100036</Hsp_hit-to>
      <Hsp_query-frame>1</Hsp_query-frame>
      <Hsp_hit-frame>-1</Hsp_hit-frame>
      <Hsp_identity>25</Hsp_identity>
      <Hsp_positive>25</Hsp_positive>
      <Hsp_gaps>0</Hsp_gaps>
      <Hsp_align-len>25</Hsp_align-len>
      <Hsp_qseq>ATCGCTTCTCGGCCTTTTGGCTAAG</Hsp_qseq>
      <Hsp_hseq>ATCGCTTCTCGGCCTTTTGGCTAAG</Hsp_hseq>
      <Hsp_midline>|||||||||||||||||||||||||</Hsp_midline>
    </Hsp>
    <Hsp>
      <Hsp_num>9</Hsp_num>
      <Hsp_bit-score>46.3705</Hsp_bit-score>
      <Hsp_score>50</Hsp_score>
      <Hsp_evalue>0.00639129</Hsp_evalue>
      <Hsp_query-from>1</Hsp_query-from>
      <Hsp_query-to>25</Hsp_query-to>
      <Hsp_hit-from>117381</Hsp_hit-from>
      <Hsp_hit-to>117357</Hsp_hit-to>
      <Hsp_query-frame>1</Hsp_query-frame>
      <Hsp_hit-frame>-1</Hsp_hit-frame>
      <Hsp_identity>25</Hsp_identity>
      <Hsp_positive>25</Hsp_positive>
      <Hsp_gaps>0</Hsp_gaps>
      <Hsp_align-len>25</Hsp_align-len>
      <Hsp_qseq>ATCGCTTCTCGGCCTTTTGGCTAAG</Hsp_qseq>
      <Hsp_hseq>ATCGCTTCTCGGCCTTTTGGCTAAG</Hsp_hseq>
      <Hsp_midline>|||||||||||||||||||||||||</Hsp_midline>
    </Hsp>
    <Hsp>
      <Hsp_num>10</Hsp_num>
      <Hsp_bit-score>42.7638</Hsp_bit-score>
      <Hsp_score>46</Hsp_score>
      <Hsp_evalue>0.0778619</Hsp_evalue>
      <Hsp_query-from>1</Hsp_query-from>
      <Hsp_query-to>28</Hsp_query-to>
      <Hsp_hit-from>46781</Hsp_hit-from>
      <Hsp_hit-to>46754</Hsp_hit-to>
      <Hsp_query-frame>1</Hsp_query-frame>
      <Hsp_hit-frame>-1</Hsp_hit-frame>
      <Hsp_identity>26</Hsp_identity>
      <Hsp_positive>26</Hsp_positive>
      <Hsp_gaps>0</Hsp_gaps>
      <Hsp_align-len>28</Hsp_align-len>
      <Hsp_qseq>ATCGCTTCTCGGCCTTTTGGCTAAGATC</Hsp_qseq>
      <Hsp_hseq>ATCGCTTCTCGGCCTTTTGGCGAAGCTC</Hsp_hseq>
      <Hsp_midline>||||||||||||||||||||| ||| ||</Hsp_midline>
    </Hsp>
  </Hit_hsps>
</Hit>
<Hit>
  <Hit_num>28</Hit_num>
  <Hit_id>gi|156324994|ref|NW_001828013.1|</Hit_id>
  <Hit_def>Nematostella vectensis NEMVEscaffold_7168 genomic scaffold, whole genome shotgun sequence</Hit_def>
  <Hit_accession>NW_001828013</Hit_accession>
  <Hit_len>6274</Hit_len>
  <Hit_hsps>
    <Hsp>
      <Hsp_num>1</Hsp_num>
      <Hsp_bit-score>129.325</Hsp_bit-score>
      <Hsp_score>142</Hsp_score>
      <Hsp_evalue>6.81798e-28</Hsp_evalue>
      <Hsp_query-from>1</Hsp_query-from>
      <Hsp_query-to>107</Hsp_query-to>
      <Hsp_hit-from>6136</Hsp_hit-from>
      <Hsp_hit-to>6243</Hsp_hit-to>
      <Hsp_query-frame>1</Hsp_query-frame>
      <Hsp_hit-frame>1</Hsp_hit-frame>
      <Hsp_identity>94</Hsp_identity>
      <Hsp_positive>94</Hsp_positive>
      <Hsp_gaps>1</Hsp_gaps>
      <Hsp_align-len>108</Hsp_align-len>
      <Hsp_qseq>ATCGCTTCTCGGCCTTTTGGCTAAGATCAAGTGTAGTATCTGTTCTTATCAGTTTAATATCTGATACG-TCCTCTATCCGAGGACAATATATTAAATGGATTTTTGGA</Hsp_qseq>
      <Hsp_hseq>ATCGCTTCTCGGCCTTTTGGCTAAGATCAAGTGTAGTATCTGTTCTTATCAGCTTAATATCTGATACGCTGCTCATTGAGTAGCTCATATATTAAACTGATTTTTGGA</Hsp_hseq>
      <Hsp_midline>|||||||||||||||||||||||||||||||||||||||||||||||||||| ||||||||||||||| | |||  |  |  |   ||||||||||  ||||||||||</Hsp_midline>
    </Hsp>
  </Hit_hsps>
</Hit>
<Hit>
  <Hit_num>29</Hit_num>
  <Hit_id>gi|156311433|ref|NW_001825345.1|</Hit_id>
  <Hit_def>Nematostella vectensis NEMVEscaffold_12326 genomic scaffold, whole genome shotgun sequence</Hit_def>
  <Hit_accession>NW_001825345</Hit_accession>
  <Hit_len>1341</Hit_len>
  <Hit_hsps>
    <Hsp>
      <Hsp_num>1</Hsp_num>
      <Hsp_bit-score>129.325</Hsp_bit-score>
      <Hsp_score>142</Hsp_score>
      <Hsp_evalue>6.81798e-28</Hsp_evalue>
      <Hsp_query-from>1</Hsp_query-from>
      <Hsp_query-to>107</Hsp_query-to>
      <Hsp_hit-from>1133</Hsp_hit-from>
      <Hsp_hit-to>1026</Hsp_hit-to>
      <Hsp_query-frame>1</Hsp_query-frame>
      <Hsp_hit-frame>-1</Hsp_hit-frame>
      <Hsp_identity>94</Hsp_identity>
      <Hsp_positive>94</Hsp_positive>
      <Hsp_gaps>1</Hsp_gaps>
      <Hsp_align-len>108</Hsp_align-len>
      <Hsp_qseq>ATCGCTTCTCGGCCTTTTGGCTAAGATCAAGTGTAGTATCTGTTCTTATCAGTTTAATATCTGATACG-TCCTCTATCCGAGGACAATATATTAAATGGATTTTTGGA</Hsp_qseq>
      <Hsp_hseq>ATCGCTTCTCGGCCTTTTGGCTAAGATCAAGTGTAGTATCTGTTCTTATCAGCTTAATATCTGATACGCTGCTCATTGAGTAGCTCATATATTAAACTGATTTTTGGA</Hsp_hseq>
      <Hsp_midline>|||||||||||||||||||||||||||||||||||||||||||||||||||| ||||||||||||||| | |||  |  |  |   ||||||||||  ||||||||||</Hsp_midline>
    </Hsp>
  </Hit_hsps>
</Hit>
<Hit>
  <Hit_num>30</Hit_num>
  <Hit_id>gi|1601958520|ref|NW_021163260.1|</Hit_id>
  <Hit_def>Dendronephthya gigantea isolate DGI-Jeju-01 unplaced genomic scaffold, DenGig_1.0 000250F</Hit_def>
  <Hit_accession>NW_021163260</Hit_accession>
  <Hit_len>215363</Hit_len>
  <Hit_hsps>
    <Hsp>
      <Hsp_num>1</Hsp_num>
      <Hsp_bit-score>125.719</Hsp_bit-score>
      <Hsp_score>138</Hsp_score>
      <Hsp_evalue>8.306e-27</Hsp_evalue>
      <Hsp_query-from>1</Hsp_query-from>
      <Hsp_query-to>173</Hsp_query-to>
      <Hsp_hit-from>111814</Hsp_hit-from>
      <Hsp_hit-to>111641</Hsp_hit-to>
      <Hsp_query-frame>1</Hsp_query-frame>
      <Hsp_hit-frame>-1</Hsp_hit-frame>
      <Hsp_identity>135</Hsp_identity>
      <Hsp_positive>135</Hsp_positive>
      <Hsp_gaps>3</Hsp_gaps>
      <Hsp_align-len>175</Hsp_align-len>
      <Hsp_qseq>ATCGCTTCTCGGCCTTTTGGCTAAGATCAAGTGTAGTATCTGTTCTTATCAGTTTAATATCTGATACG-TCCTCTAT-CCGAGGACAATATATTAAATGGATTTTTGGAGCAGGGAGATGGAATAGGAGCTTGCTCTGTCCACTCCACGCATCGACCTGGTATTGCAGTACCTCC</Hsp_qseq>
      <Hsp_hseq>ATCGCTTCTCGGCCTTTTGGCTAAGATCAAGTGTAGTATCTGTTCTTATCAGCTTAATATCTGATATGTTAGGCAATGCCTAACTC-ATATATTAAACTGATTTTTGGCCTTCGGCCCTGGGATTGAAGCTTGCTTCGCCCTGGCCACGGGTTGTCTCGGTATTGCACTACATCC</Hsp_hseq>
      <Hsp_midline>|||||||||||||||||||||||||||||||||||||||||||||||||||| ||||||||||||| | |   | || || |   | ||||||||||  |||||||||     ||   ||| || | ||||||||  | ||   |||||  | | |  ||||||||| ||| |||</Hsp_midline>
    </Hsp>
    <Hsp>
      <Hsp_num>2</Hsp_num>
      <Hsp_bit-score>125.719</Hsp_bit-score>
      <Hsp_score>138</Hsp_score>
      <Hsp_evalue>8.306e-27</Hsp_evalue>
      <Hsp_query-from>1</Hsp_query-from>
      <Hsp_query-to>173</Hsp_query-to>
      <Hsp_hit-from>137366</Hsp_hit-from>
      <Hsp_hit-to>137193</Hsp_hit-to>
      <Hsp_query-frame>1</Hsp_query-frame>
      <Hsp_hit-frame>-1</Hsp_hit-frame>
      <Hsp_identity>135</Hsp_identity>
      <Hsp_positive>135</Hsp_positive>
      <Hsp_gaps>3</Hsp_gaps>
      <Hsp_align-len>175</Hsp_align-len>
      <Hsp_qseq>ATCGCTTCTCGGCCTTTTGGCTAAGATCAAGTGTAGTATCTGTTCTTATCAGTTTAATATCTGATACG-TCCTCTAT-CCGAGGACAATATATTAAATGGATTTTTGGAGCAGGGAGATGGAATAGGAGCTTGCTCTGTCCACTCCACGCATCGACCTGGTATTGCAGTACCTCC</Hsp_qseq>
      <Hsp_hseq>ATCGCTTCTCGGCCTTTTGGCTAAGATCAAGTGTAGTATCTGTTCTTATCAGCTTAATATCTGATATGTTAGGCAATGCCTAACTC-ATATATTAAACTGATTTTTGGCCTTCGGCCCTGGGATTGAAGCTTGCTTCGCCCTGGCCACGGGTTGTCTCGGTATTGCACTACATCC</Hsp_hseq>
      <Hsp_midline>|||||||||||||||||||||||||||||||||||||||||||||||||||| ||||||||||||| | |   | || || |   | ||||||||||  |||||||||     ||   ||| || | ||||||||  | ||   |||||  | | |  ||||||||| ||| |||</Hsp_midline>
    </Hsp>
    <Hsp>
      <Hsp_num>3</Hsp_num>
      <Hsp_bit-score>125.719</Hsp_bit-score>
      <Hsp_score>138</Hsp_score>
      <Hsp_evalue>8.306e-27</Hsp_evalue>
      <Hsp_query-from>1</Hsp_query-from>
      <Hsp_query-to>173</Hsp_query-to>
      <Hsp_hit-from>149075</Hsp_hit-from>
      <Hsp_hit-to>148902</Hsp_hit-to>
      <Hsp_query-frame>1</Hsp_query-frame>
      <Hsp_hit-frame>-1</Hsp_hit-frame>
      <Hsp_identity>135</Hsp_identity>
      <Hsp_positive>135</Hsp_positive>
      <Hsp_gaps>3</Hsp_gaps>
      <Hsp_align-len>175</Hsp_align-len>
      <Hsp_qseq>ATCGCTTCTCGGCCTTTTGGCTAAGATCAAGTGTAGTATCTGTTCTTATCAGTTTAATATCTGATACG-TCCTCTAT-CCGAGGACAATATATTAAATGGATTTTTGGAGCAGGGAGATGGAATAGGAGCTTGCTCTGTCCACTCCACGCATCGACCTGGTATTGCAGTACCTCC</Hsp_qseq>
      <Hsp_hseq>ATCGCTTCTCGGCCTTTTGGCTAAGATCAAGTGTAGTATCTGTTCTTATCAGCTTAATATCTGATATGTTAGGCAATGCCTAACTC-ATATATTAAACTGATTTTTGGCCTTCGGCCCTGGGATTGAAGCTTGCTTCGCCCTGGCCACGGGTTGTCTCGGTATTGCACTACATCC</Hsp_hseq>
      <Hsp_midline>|||||||||||||||||||||||||||||||||||||||||||||||||||| ||||||||||||| | |   | || || |   | ||||||||||  |||||||||     ||   ||| || | ||||||||  | ||   |||||  | | |  ||||||||| ||| |||</Hsp_midline>
    </Hsp>
    <Hsp>
      <Hsp_num>4</Hsp_num>
      <Hsp_bit-score>125.719</Hsp_bit-score>
      <Hsp_score>138</Hsp_score>
      <Hsp_evalue>8.306e-27</Hsp_evalue>
      <Hsp_query-from>1</Hsp_query-from>
      <Hsp_query-to>173</Hsp_query-to>
      <Hsp_hit-from>160790</Hsp_hit-from>
      <Hsp_hit-to>160617</Hsp_hit-to>
      <Hsp_query-frame>1</Hsp_query-frame>
      <Hsp_hit-frame>-1</Hsp_hit-frame>
      <Hsp_identity>135</Hsp_identity>
      <Hsp_positive>135</Hsp_positive>
      <Hsp_gaps>3</Hsp_gaps>
      <Hsp_align-len>175</Hsp_align-len>
      <Hsp_qseq>ATCGCTTCTCGGCCTTTTGGCTAAGATCAAGTGTAGTATCTGTTCTTATCAGTTTAATATCTGATACG-TCCTCTAT-CCGAGGACAATATATTAAATGGATTTTTGGAGCAGGGAGATGGAATAGGAGCTTGCTCTGTCCACTCCACGCATCGACCTGGTATTGCAGTACCTCC</Hsp_qseq>
      <Hsp_hseq>ATCGCTTCTCGGCCTTTTGGCTAAGATCAAGTGTAGTATCTGTTCTTATCAGCTTAATATCTGATATGTTAGGCAATGCCTAACTC-ATATATTAAACTGATTTTTGGCCTTCGGCCCTGGGATTGAAGCTTGCTTCGCCCTGGCCACGGGTTGTCTCGGTATTGCACTACATCC</Hsp_hseq>
      <Hsp_midline>|||||||||||||||||||||||||||||||||||||||||||||||||||| ||||||||||||| | |   | || || |   | ||||||||||  |||||||||     ||   ||| || | ||||||||  | ||   |||||  | | |  ||||||||| ||| |||</Hsp_midline>
    </Hsp>
    <Hsp>
      <Hsp_num>5</Hsp_num>
      <Hsp_bit-score>125.719</Hsp_bit-score>
      <Hsp_score>138</Hsp_score>
      <Hsp_evalue>8.306e-27</Hsp_evalue>
      <Hsp_query-from>1</Hsp_query-from>
      <Hsp_query-to>173</Hsp_query-to>
      <Hsp_hit-from>169908</Hsp_hit-from>
      <Hsp_hit-to>169735</Hsp_hit-to>
      <Hsp_query-frame>1</Hsp_query-frame>
      <Hsp_hit-frame>-1</Hsp_hit-frame>
      <Hsp_identity>135</Hsp_identity>
      <Hsp_positive>135</Hsp_positive>
      <Hsp_gaps>3</Hsp_gaps>
      <Hsp_align-len>175</Hsp_align-len>
      <Hsp_qseq>ATCGCTTCTCGGCCTTTTGGCTAAGATCAAGTGTAGTATCTGTTCTTATCAGTTTAATATCTGATACG-TCCTCTAT-CCGAGGACAATATATTAAATGGATTTTTGGAGCAGGGAGATGGAATAGGAGCTTGCTCTGTCCACTCCACGCATCGACCTGGTATTGCAGTACCTCC</Hsp_qseq>
      <Hsp_hseq>ATCGCTTCTCGGCCTTTTGGCTAAGATCAAGTGTAGTATCTGTTCTTATCAGCTTAATATCTGATATGTTAGGCAATGCCTAACTC-ATATATTAAACTGATTTTTGGCCTTCGGCCCTGGGATTGAAGCTTGCTTCGCCCTGGCCACGGGTTGTCTCGGTATTGCACTACATCC</Hsp_hseq>
      <Hsp_midline>|||||||||||||||||||||||||||||||||||||||||||||||||||| ||||||||||||| | |   | || || |   | ||||||||||  |||||||||     ||   ||| || | ||||||||  | ||   |||||  | | |  ||||||||| ||| |||</Hsp_midline>
    </Hsp>
    <Hsp>
      <Hsp_num>6</Hsp_num>
      <Hsp_bit-score>87.848</Hsp_bit-score>
      <Hsp_score>96</Hsp_score>
      <Hsp_evalue>2.08748e-15</Hsp_evalue>
      <Hsp_query-from>22</Hsp_query-from>
      <Hsp_query-to>173</Hsp_query-to>
      <Hsp_hit-from>162267</Hsp_hit-from>
      <Hsp_hit-to>162115</Hsp_hit-to>
      <Hsp_query-frame>1</Hsp_query-frame>
      <Hsp_hit-frame>-1</Hsp_hit-frame>
      <Hsp_identity>114</Hsp_identity>
      <Hsp_positive>114</Hsp_positive>
      <Hsp_gaps>3</Hsp_gaps>
      <Hsp_align-len>154</Hsp_align-len>
      <Hsp_qseq>TAAGATCAAGTGTAGTATCTGTTCTTATCAGTTTAATATCTGATACG-TCCTCTAT-CCGAGGACAATATATTAAATGGATTTTTGGAGCAGGGAGATGGAATAGGAGCTTGCTCTGTCCACTCCACGCATCGACCTGGTATTGCAGTACCTCC</Hsp_qseq>
      <Hsp_hseq>TAAGATCAAGTGTAGTATCTGTTCTTATCAGCTTAATATCTGATATGTTAGGCAATGCCTAACTC-ATATATTAAACTGATTTTTGGCCTTCGGCCCTGGGATTGAAGCTTGCTTCGCCCTGGCCACGGGTTGTCTCGGTATTGCACTACATCC</Hsp_hseq>
      <Hsp_midline>||||||||||||||||||||||||||||||| ||||||||||||| | |   | || || |   | ||||||||||  |||||||||     ||   ||| || | ||||||||  | ||   |||||  | | |  ||||||||| ||| |||</Hsp_midline>
    </Hsp>
    <Hsp>
      <Hsp_num>7</Hsp_num>
      <Hsp_bit-score>87.848</Hsp_bit-score>
      <Hsp_score>96</Hsp_score>
      <Hsp_evalue>2.08748e-15</Hsp_evalue>
      <Hsp_query-from>22</Hsp_query-from>
      <Hsp_query-to>173</Hsp_query-to>
      <Hsp_hit-from>171355</Hsp_hit-from>
      <Hsp_hit-to>171203</Hsp_hit-to>
      <Hsp_query-frame>1</Hsp_query-frame>
      <Hsp_hit-frame>-1</Hsp_hit-frame>
      <Hsp_identity>114</Hsp_identity>
      <Hsp_positive>114</Hsp_positive>
      <Hsp_gaps>3</Hsp_gaps>
      <Hsp_align-len>154</Hsp_align-len>
      <Hsp_qseq>TAAGATCAAGTGTAGTATCTGTTCTTATCAGTTTAATATCTGATACG-TCCTCTAT-CCGAGGACAATATATTAAATGGATTTTTGGAGCAGGGAGATGGAATAGGAGCTTGCTCTGTCCACTCCACGCATCGACCTGGTATTGCAGTACCTCC</Hsp_qseq>
      <Hsp_hseq>TAAGATCAAGTGTAGTATCTGTTCTTATCAGCTTAATATCTGATATGTTAGGCAATGCCTAACTC-ATATATTAAACTGATTTTTGGCCTTCGGCCCTGGGATTGAAGCTTGCTTCGCCCTGGCCACGGGTTGTCTCGGTATTGCACTACATCC</Hsp_hseq>
      <Hsp_midline>||||||||||||||||||||||||||||||| ||||||||||||| | |   | || || |   | ||||||||||  |||||||||     ||   ||| || | ||||||||  | ||   |||||  | | |  ||||||||| ||| |||</Hsp_midline>
    </Hsp>
    <Hsp>
      <Hsp_num>8</Hsp_num>
      <Hsp_bit-score>87.848</Hsp_bit-score>
      <Hsp_score>96</Hsp_score>
      <Hsp_evalue>2.08748e-15</Hsp_evalue>
      <Hsp_query-from>22</Hsp_query-from>
      <Hsp_query-to>173</Hsp_query-to>
      <Hsp_hit-from>179330</Hsp_hit-from>
      <Hsp_hit-to>179178</Hsp_hit-to>
      <Hsp_query-frame>1</Hsp_query-frame>
      <Hsp_hit-frame>-1</Hsp_hit-frame>
      <Hsp_identity>114</Hsp_identity>
      <Hsp_positive>114</Hsp_positive>
      <Hsp_gaps>3</Hsp_gaps>
      <Hsp_align-len>154</Hsp_align-len>
      <Hsp_qseq>TAAGATCAAGTGTAGTATCTGTTCTTATCAGTTTAATATCTGATACG-TCCTCTAT-CCGAGGACAATATATTAAATGGATTTTTGGAGCAGGGAGATGGAATAGGAGCTTGCTCTGTCCACTCCACGCATCGACCTGGTATTGCAGTACCTCC</Hsp_qseq>
      <Hsp_hseq>TAAGATCAAGTGTAGTATCTGTTCTTATCAGCTTAATATCTGATATGTTAGGCAATGCCTAACTC-ATATATTAAACTGATTTTTGGCCTTCGGCCCTGGGATTGAACCTTGCTTCGCCCTGGCCACGGGTTGTCTCGGTATTGCAGTACATCC</Hsp_hseq>
      <Hsp_midline>||||||||||||||||||||||||||||||| ||||||||||||| | |   | || || |   | ||||||||||  |||||||||     ||   ||| || | | ||||||  | ||   |||||  | | |  ||||||||||||| |||</Hsp_midline>
    </Hsp>
    <Hsp>
      <Hsp_num>9</Hsp_num>
      <Hsp_bit-score>87.848</Hsp_bit-score>
      <Hsp_score>96</Hsp_score>
      <Hsp_evalue>2.08748e-15</Hsp_evalue>
      <Hsp_query-from>22</Hsp_query-from>
      <Hsp_query-to>173</Hsp_query-to>
      <Hsp_hit-from>202900</Hsp_hit-from>
      <Hsp_hit-to>202748</Hsp_hit-to>
      <Hsp_query-frame>1</Hsp_query-frame>
      <Hsp_hit-frame>-1</Hsp_hit-frame>
      <Hsp_identity>114</Hsp_identity>
      <Hsp_positive>114</Hsp_positive>
      <Hsp_gaps>3</Hsp_gaps>
      <Hsp_align-len>154</Hsp_align-len>
      <Hsp_qseq>TAAGATCAAGTGTAGTATCTGTTCTTATCAGTTTAATATCTGATACG-TCCTCTAT-CCGAGGACAATATATTAAATGGATTTTTGGAGCAGGGAGATGGAATAGGAGCTTGCTCTGTCCACTCCACGCATCGACCTGGTATTGCAGTACCTCC</Hsp_qseq>
      <Hsp_hseq>TAAGATCAAGTGTAGTATCTGTTCTTATCAGCTTAATATCTGATATGTTAGGCAATGCCTAACTC-ATATATTAAACTGATTTTTGGCCTTCGGCCCTGGGATTGAAGCTTGCTTCGCCCTGGCCACGGGTTGTCTCGGTATTGCACTACATCC</Hsp_hseq>
      <Hsp_midline>||||||||||||||||||||||||||||||| ||||||||||||| | |   | || || |   | ||||||||||  |||||||||     ||   ||| || | ||||||||  | ||   |||||  | | |  ||||||||| ||| |||</Hsp_midline>
    </Hsp>
    <Hsp>
      <Hsp_num>10</Hsp_num>
      <Hsp_bit-score>84.2413</Hsp_bit-score>
      <Hsp_score>92</Hsp_score>
      <Hsp_evalue>2.54307e-14</Hsp_evalue>
      <Hsp_query-from>24</Hsp_query-from>
      <Hsp_query-to>173</Hsp_query-to>
      <Hsp_hit-from>126629</Hsp_hit-from>
      <Hsp_hit-to>126479</Hsp_hit-to>
      <Hsp_query-frame>1</Hsp_query-frame>
      <Hsp_hit-frame>-1</Hsp_hit-frame>
      <Hsp_identity>112</Hsp_identity>
      <Hsp_positive>112</Hsp_positive>
      <Hsp_gaps>3</Hsp_gaps>
      <Hsp_align-len>152</Hsp_align-len>
      <Hsp_qseq>AGATCAAGTGTAGTATCTGTTCTTATCAGTTTAATATCTGATACG-TCCTCTAT-CCGAGGACAATATATTAAATGGATTTTTGGAGCAGGGAGATGGAATAGGAGCTTGCTCTGTCCACTCCACGCATCGACCTGGTATTGCAGTACCTCC</Hsp_qseq>
      <Hsp_hseq>AGATCAAGTGTAGTATCTGTTCTTATCAGCTTAATATCTGATATGTTAGGCAATGCCTAACTC-ATATATTAAACTGATTTTTGGCCTTCGGCCCTGGGATTGAAGCTTGCTTCGCCCTGGCCACGGGTTGTCTCGGTATTGCACTACATCC</Hsp_hseq>
      <Hsp_midline>||||||||||||||||||||||||||||| ||||||||||||| | |   | || || |   | ||||||||||  |||||||||     ||   ||| || | ||||||||  | ||   |||||  | | |  ||||||||| ||| |||</Hsp_midline>
    </Hsp>
    <Hsp>
      <Hsp_num>11</Hsp_num>
      <Hsp_bit-score>84.2413</Hsp_bit-score>
      <Hsp_score>92</Hsp_score>
      <Hsp_evalue>2.54307e-14</Hsp_evalue>
      <Hsp_query-from>24</Hsp_query-from>
      <Hsp_query-to>173</Hsp_query-to>
      <Hsp_hit-from>147223</Hsp_hit-from>
      <Hsp_hit-to>147073</Hsp_hit-to>
      <Hsp_query-frame>1</Hsp_query-frame>
      <Hsp_hit-frame>-1</Hsp_hit-frame>
      <Hsp_identity>112</Hsp_identity>
      <Hsp_positive>112</Hsp_positive>
      <Hsp_gaps>3</Hsp_gaps>
      <Hsp_align-len>152</Hsp_align-len>
      <Hsp_qseq>AGATCAAGTGTAGTATCTGTTCTTATCAGTTTAATATCTGATACG-TCCTCTAT-CCGAGGACAATATATTAAATGGATTTTTGGAGCAGGGAGATGGAATAGGAGCTTGCTCTGTCCACTCCACGCATCGACCTGGTATTGCAGTACCTCC</Hsp_qseq>
      <Hsp_hseq>AGATCAAGTGTAGTATCTGTTCTTATCAGCTTAATATCTGATATGTTAGGCAATGCCTAACTC-ATATATTAAACTGATTTTTGGCCTTCGGCCCTGGGATTGAAGCTTGCTTCGCCCTGGCCACGGGTTGTCTCGGTATTGCACTACATCC</Hsp_hseq>
      <Hsp_midline>||||||||||||||||||||||||||||| ||||||||||||| | |   | || || |   | ||||||||||  |||||||||     ||   ||| || | ||||||||  | ||   |||||  | | |  ||||||||| ||| |||</Hsp_midline>
    </Hsp>
    <Hsp>
      <Hsp_num>12</Hsp_num>
      <Hsp_bit-score>84.2413</Hsp_bit-score>
      <Hsp_score>92</Hsp_score>
      <Hsp_evalue>2.54307e-14</Hsp_evalue>
      <Hsp_query-from>24</Hsp_query-from>
      <Hsp_query-to>173</Hsp_query-to>
      <Hsp_hit-from>150565</Hsp_hit-from>
      <Hsp_hit-to>150415</Hsp_hit-to>
      <Hsp_query-frame>1</Hsp_query-frame>
      <Hsp_hit-frame>-1</Hsp_hit-frame>
      <Hsp_identity>112</Hsp_identity>
      <Hsp_positive>112</Hsp_positive>
      <Hsp_gaps>3</Hsp_gaps>
      <Hsp_align-len>152</Hsp_align-len>
      <Hsp_qseq>AGATCAAGTGTAGTATCTGTTCTTATCAGTTTAATATCTGATACG-TCCTCTAT-CCGAGGACAATATATTAAATGGATTTTTGGAGCAGGGAGATGGAATAGGAGCTTGCTCTGTCCACTCCACGCATCGACCTGGTATTGCAGTACCTCC</Hsp_qseq>
      <Hsp_hseq>AGATCAAGTGTAGTATCTGTTCTTATCAGCTTAATATCTGATATGTTAGGCAATGCCTAACTC-ATATATTAAACTGATTTTTGGCCTTCGGCCCTGGGATTGAAGCTTGCTTCGCCCTGGCCACGGGTTGTCTCGGTATTGCACTACATCC</Hsp_hseq>
      <Hsp_midline>||||||||||||||||||||||||||||| ||||||||||||| | |   | || || |   | ||||||||||  |||||||||     ||   ||| || | ||||||||  | ||   |||||  | | |  ||||||||| ||| |||</Hsp_midline>
    </Hsp>
    <Hsp>
      <Hsp_num>13</Hsp_num>
      <Hsp_bit-score>84.2413</Hsp_bit-score>
      <Hsp_score>92</Hsp_score>
      <Hsp_evalue>2.54307e-14</Hsp_evalue>
      <Hsp_query-from>24</Hsp_query-from>
      <Hsp_query-to>173</Hsp_query-to>
      <Hsp_hit-from>152397</Hsp_hit-from>
      <Hsp_hit-to>152247</Hsp_hit-to>
      <Hsp_query-frame>1</Hsp_query-frame>
      <Hsp_hit-frame>-1</Hsp_hit-frame>
      <Hsp_identity>112</Hsp_identity>
      <Hsp_positive>112</Hsp_positive>
      <Hsp_gaps>3</Hsp_gaps>
      <Hsp_align-len>152</Hsp_align-len>
      <Hsp_qseq>AGATCAAGTGTAGTATCTGTTCTTATCAGTTTAATATCTGATACG-TCCTCTAT-CCGAGGACAATATATTAAATGGATTTTTGGAGCAGGGAGATGGAATAGGAGCTTGCTCTGTCCACTCCACGCATCGACCTGGTATTGCAGTACCTCC</Hsp_qseq>
      <Hsp_hseq>AGATCAAGTGTAGTATCTGTTCTTATCAGCTTAATATCTGATATGTTAGGCAATGCCTAACTC-ATATATTAAACTGATTTTTGGCCTTCGGCCCTGGGATTGAAGCTTGCTTCGCCCTGGCCACGGGTTGTCTCGGTATTGCACTACATCC</Hsp_hseq>
      <Hsp_midline>||||||||||||||||||||||||||||| ||||||||||||| | |   | || || |   | ||||||||||  |||||||||     ||   ||| || | ||||||||  | ||   |||||  | | |  ||||||||| ||| |||</Hsp_midline>
    </Hsp>
    <Hsp>
      <Hsp_num>14</Hsp_num>
      <Hsp_bit-score>84.2413</Hsp_bit-score>
      <Hsp_score>92</Hsp_score>
      <Hsp_evalue>2.54307e-14</Hsp_evalue>
      <Hsp_query-from>24</Hsp_query-from>
      <Hsp_query-to>173</Hsp_query-to>
      <Hsp_hit-from>210284</Hsp_hit-from>
      <Hsp_hit-to>210134</Hsp_hit-to>
      <Hsp_query-frame>1</Hsp_query-frame>
      <Hsp_hit-frame>-1</Hsp_hit-frame>
      <Hsp_identity>112</Hsp_identity>
      <Hsp_positive>112</Hsp_positive>
      <Hsp_gaps>3</Hsp_gaps>
      <Hsp_align-len>152</Hsp_align-len>
      <Hsp_qseq>AGATCAAGTGTAGTATCTGTTCTTATCAGTTTAATATCTGATACG-TCCTCTAT-CCGAGGACAATATATTAAATGGATTTTTGGAGCAGGGAGATGGAATAGGAGCTTGCTCTGTCCACTCCACGCATCGACCTGGTATTGCAGTACCTCC</Hsp_qseq>
      <Hsp_hseq>AGATCAAGTGTAGTATCTGTTCTTATCAGCTTAATATCTGATATGTTAGGCAATGCCTAACTC-ATATATTAAACTGATTTTTGGCCTTCGGCCCTGGGATTGAAGCTTGCTTCGCCCTGGCCACGGGTTGTCTCGGTATTGCACTACATCC</Hsp_hseq>
      <Hsp_midline>||||||||||||||||||||||||||||| ||||||||||||| | |   | || || |   | ||||||||||  |||||||||     ||   ||| || | ||||||||  | ||   |||||  | | |  ||||||||| ||| |||</Hsp_midline>
    </Hsp>
    <Hsp>
      <Hsp_num>15</Hsp_num>
      <Hsp_bit-score>81.5362</Hsp_bit-score>
      <Hsp_score>89</Hsp_score>
      <Hsp_evalue>3.09809e-13</Hsp_evalue>
      <Hsp_query-from>24</Hsp_query-from>
      <Hsp_query-to>169</Hsp_query-to>
      <Hsp_hit-from>145394</Hsp_hit-from>
      <Hsp_hit-to>145248</Hsp_hit-to>
      <Hsp_query-frame>1</Hsp_query-frame>
      <Hsp_hit-frame>-1</Hsp_hit-frame>
      <Hsp_identity>109</Hsp_identity>
      <Hsp_positive>109</Hsp_positive>
      <Hsp_gaps>3</Hsp_gaps>
      <Hsp_align-len>148</Hsp_align-len>
      <Hsp_qseq>AGATCAAGTGTAGTATCTGTTCTTATCAGTTTAATATCTGATACG-TCCTCTAT-CCGAGGACAATATATTAAATGGATTTTTGGAGCAGGGAGATGGAATAGGAGCTTGCTCTGTCCACTCCACGCATCGACCTGGTATTGCAGTAC</Hsp_qseq>
      <Hsp_hseq>AGATCAAGTGTAGTATCTGTTCTTATCAGCTTAATATCTGATATGTTAGGCAATGCCTAACTC-ATATATTAAACTGATTTTTGGCCTTCGGCCCTGGGATTGAAGCTTGCTTCGCCCTGGCCACGGGTTGTCTCGGTATTGCACTAC</Hsp_hseq>
      <Hsp_midline>||||||||||||||||||||||||||||| ||||||||||||| | |   | || || |   | ||||||||||  |||||||||     ||   ||| || | ||||||||  | ||   |||||  | | |  ||||||||| |||</Hsp_midline>
    </Hsp>
    <Hsp>
      <Hsp_num>16</Hsp_num>
      <Hsp_bit-score>68.0109</Hsp_bit-score>
      <Hsp_score>74</Hsp_score>
      <Hsp_evalue>1.95511e-09</Hsp_evalue>
      <Hsp_query-from>1</Hsp_query-from>
      <Hsp_query-to>37</Hsp_query-to>
      <Hsp_hit-from>50682</Hsp_hit-from>
      <Hsp_hit-to>50646</Hsp_hit-to>
      <Hsp_query-frame>1</Hsp_query-frame>
      <Hsp_hit-frame>-1</Hsp_hit-frame>
      <Hsp_identity>37</Hsp_identity>
      <Hsp_positive>37</Hsp_positive>
      <Hsp_gaps>0</Hsp_gaps>
      <Hsp_align-len>37</Hsp_align-len>
      <Hsp_qseq>ATCGCTTCTCGGCCTTTTGGCTAAGATCAAGTGTAGT</Hsp_qseq>
      <Hsp_hseq>ATCGCTTCTCGGCCTTTTGGCTAAGATCAAGTGTAGT</Hsp_hseq>
      <Hsp_midline>|||||||||||||||||||||||||||||||||||||</Hsp_midline>
    </Hsp>
    <Hsp>
      <Hsp_num>17</Hsp_num>
      <Hsp_bit-score>68.0109</Hsp_bit-score>
      <Hsp_score>74</Hsp_score>
      <Hsp_evalue>1.95511e-09</Hsp_evalue>
      <Hsp_query-from>1</Hsp_query-from>
      <Hsp_query-to>37</Hsp_query-to>
      <Hsp_hit-from>126970</Hsp_hit-from>
      <Hsp_hit-to>126934</Hsp_hit-to>
      <Hsp_query-frame>1</Hsp_query-frame>
      <Hsp_hit-frame>-1</Hsp_hit-frame>
      <Hsp_identity>37</Hsp_identity>
      <Hsp_positive>37</Hsp_positive>
      <Hsp_gaps>0</Hsp_gaps>
      <Hsp_align-len>37</Hsp_align-len>
      <Hsp_qseq>ATCGCTTCTCGGCCTTTTGGCTAAGATCAAGTGTAGT</Hsp_qseq>
      <Hsp_hseq>ATCGCTTCTCGGCCTTTTGGCTAAGATCAAGTGTAGT</Hsp_hseq>
      <Hsp_midline>|||||||||||||||||||||||||||||||||||||</Hsp_midline>
    </Hsp>
    <Hsp>
      <Hsp_num>18</Hsp_num>
      <Hsp_bit-score>68.0109</Hsp_bit-score>
      <Hsp_score>74</Hsp_score>
      <Hsp_evalue>1.95511e-09</Hsp_evalue>
      <Hsp_query-from>1</Hsp_query-from>
      <Hsp_query-to>37</Hsp_query-to>
      <Hsp_hit-from>145734</Hsp_hit-from>
      <Hsp_hit-to>145698</Hsp_hit-to>
      <Hsp_query-frame>1</Hsp_query-frame>
      <Hsp_hit-frame>-1</Hsp_hit-frame>
      <Hsp_identity>37</Hsp_identity>
      <Hsp_positive>37</Hsp_positive>
      <Hsp_gaps>0</Hsp_gaps>
      <Hsp_align-len>37</Hsp_align-len>
      <Hsp_qseq>ATCGCTTCTCGGCCTTTTGGCTAAGATCAAGTGTAGT</Hsp_qseq>
      <Hsp_hseq>ATCGCTTCTCGGCCTTTTGGCTAAGATCAAGTGTAGT</Hsp_hseq>
      <Hsp_midline>|||||||||||||||||||||||||||||||||||||</Hsp_midline>
    </Hsp>
    <Hsp>
      <Hsp_num>19</Hsp_num>
      <Hsp_bit-score>68.0109</Hsp_bit-score>
      <Hsp_score>74</Hsp_score>
      <Hsp_evalue>1.95511e-09</Hsp_evalue>
      <Hsp_query-from>1</Hsp_query-from>
      <Hsp_query-to>37</Hsp_query-to>
      <Hsp_hit-from>147564</Hsp_hit-from>
      <Hsp_hit-to>147528</Hsp_hit-to>
      <Hsp_query-frame>1</Hsp_query-frame>
      <Hsp_hit-frame>-1</Hsp_hit-frame>
      <Hsp_identity>37</Hsp_identity>
      <Hsp_positive>37</Hsp_positive>
      <Hsp_gaps>0</Hsp_gaps>
      <Hsp_align-len>37</Hsp_align-len>
      <Hsp_qseq>ATCGCTTCTCGGCCTTTTGGCTAAGATCAAGTGTAGT</Hsp_qseq>
      <Hsp_hseq>ATCGCTTCTCGGCCTTTTGGCTAAGATCAAGTGTAGT</Hsp_hseq>
      <Hsp_midline>|||||||||||||||||||||||||||||||||||||</Hsp_midline>
    </Hsp>
    <Hsp>
      <Hsp_num>20</Hsp_num>
      <Hsp_bit-score>68.0109</Hsp_bit-score>
      <Hsp_score>74</Hsp_score>
      <Hsp_evalue>1.95511e-09</Hsp_evalue>
      <Hsp_query-from>1</Hsp_query-from>
      <Hsp_query-to>37</Hsp_query-to>
      <Hsp_hit-from>150906</Hsp_hit-from>
      <Hsp_hit-to>150870</Hsp_hit-to>
      <Hsp_query-frame>1</Hsp_query-frame>
      <Hsp_hit-frame>-1</Hsp_hit-frame>
      <Hsp_identity>37</Hsp_identity>
      <Hsp_positive>37</Hsp_positive>
      <Hsp_gaps>0</Hsp_gaps>
      <Hsp_align-len>37</Hsp_align-len>
      <Hsp_qseq>ATCGCTTCTCGGCCTTTTGGCTAAGATCAAGTGTAGT</Hsp_qseq>
      <Hsp_hseq>ATCGCTTCTCGGCCTTTTGGCTAAGATCAAGTGTAGT</Hsp_hseq>
      <Hsp_midline>|||||||||||||||||||||||||||||||||||||</Hsp_midline>
    </Hsp>
    <Hsp>
      <Hsp_num>21</Hsp_num>
      <Hsp_bit-score>68.0109</Hsp_bit-score>
      <Hsp_score>74</Hsp_score>
      <Hsp_evalue>1.95511e-09</Hsp_evalue>
      <Hsp_query-from>1</Hsp_query-from>
      <Hsp_query-to>37</Hsp_query-to>
      <Hsp_hit-from>152738</Hsp_hit-from>
      <Hsp_hit-to>152702</Hsp_hit-to>
      <Hsp_query-frame>1</Hsp_query-frame>
      <Hsp_hit-frame>-1</Hsp_hit-frame>
      <Hsp_identity>37</Hsp_identity>
      <Hsp_positive>37</Hsp_positive>
      <Hsp_gaps>0</Hsp_gaps>
      <Hsp_align-len>37</Hsp_align-len>
      <Hsp_qseq>ATCGCTTCTCGGCCTTTTGGCTAAGATCAAGTGTAGT</Hsp_qseq>
      <Hsp_hseq>ATCGCTTCTCGGCCTTTTGGCTAAGATCAAGTGTAGT</Hsp_hseq>
      <Hsp_midline>|||||||||||||||||||||||||||||||||||||</Hsp_midline>
    </Hsp>
    <Hsp>
      <Hsp_num>22</Hsp_num>
      <Hsp_bit-score>67.1093</Hsp_bit-score>
      <Hsp_score>73</Hsp_score>
      <Hsp_evalue>6.82401e-09</Hsp_evalue>
      <Hsp_query-from>1</Hsp_query-from>
      <Hsp_query-to>47</Hsp_query-to>
      <Hsp_hit-from>110335</Hsp_hit-from>
      <Hsp_hit-to>110286</Hsp_hit-to>
      <Hsp_query-frame>1</Hsp_query-frame>
      <Hsp_hit-frame>-1</Hsp_hit-frame>
      <Hsp_identity>45</Hsp_identity>
      <Hsp_positive>45</Hsp_positive>
      <Hsp_gaps>3</Hsp_gaps>
      <Hsp_align-len>50</Hsp_align-len>
      <Hsp_qseq>ATCGCTTCTCGGCCTTTTGGCTAAGATCAAGTGTA---GTATCTGTTCTT</Hsp_qseq>
      <Hsp_hseq>ATCGCTTCTCGGCCTTTTGGCTAAGATCAAGTGTAGCCGCATTTGTTCTT</Hsp_hseq>
      <Hsp_midline>|||||||||||||||||||||||||||||||||||   | || |||||||</Hsp_midline>
    </Hsp>
    <Hsp>
      <Hsp_num>23</Hsp_num>
      <Hsp_bit-score>67.1093</Hsp_bit-score>
      <Hsp_score>73</Hsp_score>
      <Hsp_evalue>6.82401e-09</Hsp_evalue>
      <Hsp_query-from>1</Hsp_query-from>
      <Hsp_query-to>47</Hsp_query-to>
      <Hsp_hit-from>118650</Hsp_hit-from>
      <Hsp_hit-to>118601</Hsp_hit-to>
      <Hsp_query-frame>1</Hsp_query-frame>
      <Hsp_hit-frame>-1</Hsp_hit-frame>
      <Hsp_identity>45</Hsp_identity>
      <Hsp_positive>45</Hsp_positive>
      <Hsp_gaps>3</Hsp_gaps>
      <Hsp_align-len>50</Hsp_align-len>
      <Hsp_qseq>ATCGCTTCTCGGCCTTTTGGCTAAGATCAAGTGTA---GTATCTGTTCTT</Hsp_qseq>
      <Hsp_hseq>ATCGCTTCTCGGCCTTTTGGCTAAGATCAAGTGTAGCCGCATTTGTTCTT</Hsp_hseq>
      <Hsp_midline>|||||||||||||||||||||||||||||||||||   | || |||||||</Hsp_midline>
    </Hsp>
    <Hsp>
      <Hsp_num>24</Hsp_num>
      <Hsp_bit-score>67.1093</Hsp_bit-score>
      <Hsp_score>73</Hsp_score>
      <Hsp_evalue>6.82401e-09</Hsp_evalue>
      <Hsp_query-from>1</Hsp_query-from>
      <Hsp_query-to>47</Hsp_query-to>
      <Hsp_hit-from>125171</Hsp_hit-from>
      <Hsp_hit-to>125122</Hsp_hit-to>
      <Hsp_query-frame>1</Hsp_query-frame>
      <Hsp_hit-frame>-1</Hsp_hit-frame>
      <Hsp_identity>45</Hsp_identity>
      <Hsp_positive>45</Hsp_positive>
      <Hsp_gaps>3</Hsp_gaps>
      <Hsp_align-len>50</Hsp_align-len>
      <Hsp_qseq>ATCGCTTCTCGGCCTTTTGGCTAAGATCAAGTGTA---GTATCTGTTCTT</Hsp_qseq>
      <Hsp_hseq>ATCGCTTCTCGGCCTTTTGGCTAAGATCAAGTGTAGCCGCATTTGTTCTT</Hsp_hseq>
      <Hsp_midline>|||||||||||||||||||||||||||||||||||   | || |||||||</Hsp_midline>
    </Hsp>
    <Hsp>
      <Hsp_num>25</Hsp_num>
      <Hsp_bit-score>67.1093</Hsp_bit-score>
      <Hsp_score>73</Hsp_score>
      <Hsp_evalue>6.82401e-09</Hsp_evalue>
      <Hsp_query-from>1</Hsp_query-from>
      <Hsp_query-to>47</Hsp_query-to>
      <Hsp_hit-from>143949</Hsp_hit-from>
      <Hsp_hit-to>143900</Hsp_hit-to>
      <Hsp_query-frame>1</Hsp_query-frame>
      <Hsp_hit-frame>-1</Hsp_hit-frame>
      <Hsp_identity>45</Hsp_identity>
      <Hsp_positive>45</Hsp_positive>
      <Hsp_gaps>3</Hsp_gaps>
      <Hsp_align-len>50</Hsp_align-len>
      <Hsp_qseq>ATCGCTTCTCGGCCTTTTGGCTAAGATCAAGTGTA---GTATCTGTTCTT</Hsp_qseq>
      <Hsp_hseq>ATCGCTTCTCGGCCTTTTGGCTAAGATCAAGTGTAGCCGCATTTGTTCTT</Hsp_hseq>
      <Hsp_midline>|||||||||||||||||||||||||||||||||||   | || |||||||</Hsp_midline>
    </Hsp>
    <Hsp>
      <Hsp_num>26</Hsp_num>
      <Hsp_bit-score>67.1093</Hsp_bit-score>
      <Hsp_score>73</Hsp_score>
      <Hsp_evalue>6.82401e-09</Hsp_evalue>
      <Hsp_query-from>1</Hsp_query-from>
      <Hsp_query-to>47</Hsp_query-to>
      <Hsp_hit-from>159282</Hsp_hit-from>
      <Hsp_hit-to>159233</Hsp_hit-to>
      <Hsp_query-frame>1</Hsp_query-frame>
      <Hsp_hit-frame>-1</Hsp_hit-frame>
      <Hsp_identity>45</Hsp_identity>
      <Hsp_positive>45</Hsp_positive>
      <Hsp_gaps>3</Hsp_gaps>
      <Hsp_align-len>50</Hsp_align-len>
      <Hsp_qseq>ATCGCTTCTCGGCCTTTTGGCTAAGATCAAGTGTA---GTATCTGTTCTT</Hsp_qseq>
      <Hsp_hseq>ATCGCTTCTCGGCCTTTTGGCTAAGATCAAGTGTAGCCGCATTTGTTCTT</Hsp_hseq>
      <Hsp_midline>|||||||||||||||||||||||||||||||||||   | || |||||||</Hsp_midline>
    </Hsp>
    <Hsp>
      <Hsp_num>27</Hsp_num>
      <Hsp_bit-score>66.2076</Hsp_bit-score>
      <Hsp_score>72</Hsp_score>
      <Hsp_evalue>6.82401e-09</Hsp_evalue>
      <Hsp_query-from>1</Hsp_query-from>
      <Hsp_query-to>36</Hsp_query-to>
      <Hsp_hit-from>82095</Hsp_hit-from>
      <Hsp_hit-to>82060</Hsp_hit-to>
      <Hsp_query-frame>1</Hsp_query-frame>
      <Hsp_hit-frame>-1</Hsp_hit-frame>
      <Hsp_identity>36</Hsp_identity>
      <Hsp_positive>36</Hsp_positive>
      <Hsp_gaps>0</Hsp_gaps>
      <Hsp_align-len>36</Hsp_align-len>
      <Hsp_qseq>ATCGCTTCTCGGCCTTTTGGCTAAGATCAAGTGTAG</Hsp_qseq>
      <Hsp_hseq>ATCGCTTCTCGGCCTTTTGGCTAAGATCAAGTGTAG</Hsp_hseq>
      <Hsp_midline>||||||||||||||||||||||||||||||||||||</Hsp_midline>
    </Hsp>
    <Hsp>
      <Hsp_num>28</Hsp_num>
      <Hsp_bit-score>63.5025</Hsp_bit-score>
      <Hsp_score>69</Hsp_score>
      <Hsp_evalue>8.31334e-08</Hsp_evalue>
      <Hsp_query-from>22</Hsp_query-from>
      <Hsp_query-to>58</Hsp_query-to>
      <Hsp_hit-from>38902</Hsp_hit-from>
      <Hsp_hit-to>38866</Hsp_hit-to>
      <Hsp_query-frame>1</Hsp_query-frame>
      <Hsp_hit-frame>-1</Hsp_hit-frame>
      <Hsp_identity>36</Hsp_identity>
      <Hsp_positive>36</Hsp_positive>
      <Hsp_gaps>0</Hsp_gaps>
      <Hsp_align-len>37</Hsp_align-len>
      <Hsp_qseq>TAAGATCAAGTGTAGTATCTGTTCTTATCAGTTTAAT</Hsp_qseq>
      <Hsp_hseq>TAAGATCAAGTGTAGTATCTGTTCTTATCAGCTTAAT</Hsp_hseq>
      <Hsp_midline>||||||||||||||||||||||||||||||| |||||</Hsp_midline>
    </Hsp>
    <Hsp>
      <Hsp_num>29</Hsp_num>
      <Hsp_bit-score>63.5025</Hsp_bit-score>
      <Hsp_score>69</Hsp_score>
      <Hsp_evalue>8.31334e-08</Hsp_evalue>
      <Hsp_query-from>22</Hsp_query-from>
      <Hsp_query-to>58</Hsp_query-to>
      <Hsp_hit-from>68044</Hsp_hit-from>
      <Hsp_hit-to>68008</Hsp_hit-to>
      <Hsp_query-frame>1</Hsp_query-frame>
      <Hsp_hit-frame>-1</Hsp_hit-frame>
      <Hsp_identity>36</Hsp_identity>
      <Hsp_positive>36</Hsp_positive>
      <Hsp_gaps>0</Hsp_gaps>
      <Hsp_align-len>37</Hsp_align-len>
      <Hsp_qseq>TAAGATCAAGTGTAGTATCTGTTCTTATCAGTTTAAT</Hsp_qseq>
      <Hsp_hseq>TAAGATCAAGTGTAGTATCTGTTCTTATCAGCTTAAT</Hsp_hseq>
      <Hsp_midline>||||||||||||||||||||||||||||||| |||||</Hsp_midline>
    </Hsp>
    <Hsp>
      <Hsp_num>30</Hsp_num>
      <Hsp_bit-score>63.5025</Hsp_bit-score>
      <Hsp_score>69</Hsp_score>
      <Hsp_evalue>8.31334e-08</Hsp_evalue>
      <Hsp_query-from>22</Hsp_query-from>
      <Hsp_query-to>58</Hsp_query-to>
      <Hsp_hit-from>186429</Hsp_hit-from>
      <Hsp_hit-to>186393</Hsp_hit-to>
      <Hsp_query-frame>1</Hsp_query-frame>
      <Hsp_hit-frame>-1</Hsp_hit-frame>
      <Hsp_identity>36</Hsp_identity>
      <Hsp_positive>36</Hsp_positive>
      <Hsp_gaps>0</Hsp_gaps>
      <Hsp_align-len>37</Hsp_align-len>
      <Hsp_qseq>TAAGATCAAGTGTAGTATCTGTTCTTATCAGTTTAAT</Hsp_qseq>
      <Hsp_hseq>TAAGATCAAGTGTAGTATCTGTTCTTATCAGCTTAAT</Hsp_hseq>
      <Hsp_midline>||||||||||||||||||||||||||||||| |||||</Hsp_midline>
    </Hsp>
    <Hsp>
      <Hsp_num>31</Hsp_num>
      <Hsp_bit-score>59.8958</Hsp_bit-score>
      <Hsp_score>65</Hsp_score>
      <Hsp_evalue>1.01277e-06</Hsp_evalue>
      <Hsp_query-from>35</Hsp_query-from>
      <Hsp_query-to>173</Hsp_query-to>
      <Hsp_hit-from>14785</Hsp_hit-from>
      <Hsp_hit-to>14646</Hsp_hit-to>
      <Hsp_query-frame>1</Hsp_query-frame>
      <Hsp_hit-frame>-1</Hsp_hit-frame>
      <Hsp_identity>100</Hsp_identity>
      <Hsp_positive>100</Hsp_positive>
      <Hsp_gaps>3</Hsp_gaps>
      <Hsp_align-len>141</Hsp_align-len>
      <Hsp_qseq>AGTATCTGTTCTTATCAGTTTAATATCTGATACG-TCCTCTAT-CCGAGGACAATATATTAAATGGATTTTTGGAGCAGGGAGATGGAATAGGAGCTTGCTCTGTCCACTCCACGCATCGACCTGGTATTGCAGTACCTCC</Hsp_qseq>
      <Hsp_hseq>AGAATCTGTTCTTATCAGCTTAATATCTGATATGTTAGGCAATGCCTAACTC-ATATATTAAACTGATTTTTGGCCTTCGGCCCTGGGATTGAAGCTTGCTTCGCCCTGGCCACGGGTTGTCTCGGTATTGCACTACATCC</Hsp_hseq>
      <Hsp_midline>|| ||||||||||||||| ||||||||||||| | |   | || || |   | ||||||||||  |||||||||     ||   ||| || | ||||||||  | ||   |||||  | | |  ||||||||| ||| |||</Hsp_midline>
    </Hsp>
    <Hsp>
      <Hsp_num>32</Hsp_num>
      <Hsp_bit-score>57.1907</Hsp_bit-score>
      <Hsp_score>62</Hsp_score>
      <Hsp_evalue>3.53492e-06</Hsp_evalue>
      <Hsp_query-from>39</Hsp_query-from>
      <Hsp_query-to>173</Hsp_query-to>
      <Hsp_hit-from>105191</Hsp_hit-from>
      <Hsp_hit-to>105056</Hsp_hit-to>
      <Hsp_query-frame>1</Hsp_query-frame>
      <Hsp_hit-frame>-1</Hsp_hit-frame>
      <Hsp_identity>97</Hsp_identity>
      <Hsp_positive>97</Hsp_positive>
      <Hsp_gaps>3</Hsp_gaps>
      <Hsp_align-len>137</Hsp_align-len>
      <Hsp_qseq>TCTGTTCTTATCAGTTTAATATCTGATACG-TCCTCTAT-CCGAGGACAATATATTAAATGGATTTTTGGAGCAGGGAGATGGAATAGGAGCTTGCTCTGTCCACTCCACGCATCGACCTGGTATTGCAGTACCTCC</Hsp_qseq>
      <Hsp_hseq>TCTGTTCTTATCAGCTTAATATCTGATATGTTAGGCAATGCCTAACTC-ATATATTAAACTGATTTTTGGCCTTCGGCCCTGGGATTGAAGCTTGCTTCGCCCTGGCCACGGGTTGTCTCGGTATTGCACTACATCC</Hsp_hseq>
      <Hsp_midline>|||||||||||||| ||||||||||||| | |   | || || |   | ||||||||||  |||||||||     ||   ||| || | ||||||||  | ||   |||||  | | |  ||||||||| ||| |||</Hsp_midline>
    </Hsp>
    <Hsp>
      <Hsp_num>33</Hsp_num>
      <Hsp_bit-score>57.1907</Hsp_bit-score>
      <Hsp_score>62</Hsp_score>
      <Hsp_evalue>3.53492e-06</Hsp_evalue>
      <Hsp_query-from>39</Hsp_query-from>
      <Hsp_query-to>173</Hsp_query-to>
      <Hsp_hit-from>113258</Hsp_hit-from>
      <Hsp_hit-to>113123</Hsp_hit-to>
      <Hsp_query-frame>1</Hsp_query-frame>
      <Hsp_hit-frame>-1</Hsp_hit-frame>
      <Hsp_identity>97</Hsp_identity>
      <Hsp_positive>97</Hsp_positive>
      <Hsp_gaps>3</Hsp_gaps>
      <Hsp_align-len>137</Hsp_align-len>
      <Hsp_qseq>TCTGTTCTTATCAGTTTAATATCTGATACG-TCCTCTAT-CCGAGGACAATATATTAAATGGATTTTTGGAGCAGGGAGATGGAATAGGAGCTTGCTCTGTCCACTCCACGCATCGACCTGGTATTGCAGTACCTCC</Hsp_qseq>
      <Hsp_hseq>TCTGTTCTTATCAGCTTAATATCTGATATGTTAGGCAATGCCTAACTC-ATATATTAAACTGATTTTTGGCCTTCGGCCCTGGGATTGAAGCTTGCTTCGCCCTGGCCACGGGTTGTCTCGGTATTGCACTACATCC</Hsp_hseq>
      <Hsp_midline>|||||||||||||| ||||||||||||| | |   | || || |   | ||||||||||  |||||||||     ||   ||| || | ||||||||  | ||   |||||  | | |  ||||||||| ||| |||</Hsp_midline>
    </Hsp>
    <Hsp>
      <Hsp_num>34</Hsp_num>
      <Hsp_bit-score>57.1907</Hsp_bit-score>
      <Hsp_score>62</Hsp_score>
      <Hsp_evalue>3.53492e-06</Hsp_evalue>
      <Hsp_query-from>39</Hsp_query-from>
      <Hsp_query-to>173</Hsp_query-to>
      <Hsp_hit-from>134598</Hsp_hit-from>
      <Hsp_hit-to>134463</Hsp_hit-to>
      <Hsp_query-frame>1</Hsp_query-frame>
      <Hsp_hit-frame>-1</Hsp_hit-frame>
      <Hsp_identity>97</Hsp_identity>
      <Hsp_positive>97</Hsp_positive>
      <Hsp_gaps>3</Hsp_gaps>
      <Hsp_align-len>137</Hsp_align-len>
      <Hsp_qseq>TCTGTTCTTATCAGTTTAATATCTGATACG-TCCTCTAT-CCGAGGACAATATATTAAATGGATTTTTGGAGCAGGGAGATGGAATAGGAGCTTGCTCTGTCCACTCCACGCATCGACCTGGTATTGCAGTACCTCC</Hsp_qseq>
      <Hsp_hseq>TCTGTTCTTATCAGCTTAATATCTGATATGTTAGGCAATGCCTAACTC-ATATATTAAACTGATTTTTGGCCTTCGGCCCTGGGATTGAAGCTTGCTTCGCCCTGGCCACGGGTTGTCTCGGTATTGCACTACATCC</Hsp_hseq>
      <Hsp_midline>|||||||||||||| ||||||||||||| | |   | || || |   | ||||||||||  |||||||||     ||   ||| || | ||||||||  | ||   |||||  | | |  ||||||||| ||| |||</Hsp_midline>
    </Hsp>
    <Hsp>
      <Hsp_num>35</Hsp_num>
      <Hsp_bit-score>57.1907</Hsp_bit-score>
      <Hsp_score>62</Hsp_score>
      <Hsp_evalue>3.53492e-06</Hsp_evalue>
      <Hsp_query-from>39</Hsp_query-from>
      <Hsp_query-to>173</Hsp_query-to>
      <Hsp_hit-from>138809</Hsp_hit-from>
      <Hsp_hit-to>138674</Hsp_hit-to>
      <Hsp_query-frame>1</Hsp_query-frame>
      <Hsp_hit-frame>-1</Hsp_hit-frame>
      <Hsp_identity>97</Hsp_identity>
      <Hsp_positive>97</Hsp_positive>
      <Hsp_gaps>3</Hsp_gaps>
      <Hsp_align-len>137</Hsp_align-len>
      <Hsp_qseq>TCTGTTCTTATCAGTTTAATATCTGATACG-TCCTCTAT-CCGAGGACAATATATTAAATGGATTTTTGGAGCAGGGAGATGGAATAGGAGCTTGCTCTGTCCACTCCACGCATCGACCTGGTATTGCAGTACCTCC</Hsp_qseq>
      <Hsp_hseq>TCTGTTCTTATCAGCTTAATATCTGATATGTTAGGCAATGCCTAACTC-ATATATTAAACTGATTTTTGGCCTTCGGCCCTGGGATTGAAGCTTGCTTCGCCCTGGCCACGGGTTGTCTCGGTATTGCACTACATCC</Hsp_hseq>
      <Hsp_midline>|||||||||||||| ||||||||||||| | |   | || || |   | ||||||||||  |||||||||     ||   ||| || | ||||||||  | ||   |||||  | | |  ||||||||| ||| |||</Hsp_midline>
    </Hsp>
    <Hsp>
      <Hsp_num>36</Hsp_num>
      <Hsp_bit-score>57.1907</Hsp_bit-score>
      <Hsp_score>62</Hsp_score>
      <Hsp_evalue>3.53492e-06</Hsp_evalue>
      <Hsp_query-from>39</Hsp_query-from>
      <Hsp_query-to>173</Hsp_query-to>
      <Hsp_hit-from>154210</Hsp_hit-from>
      <Hsp_hit-to>154075</Hsp_hit-to>
      <Hsp_query-frame>1</Hsp_query-frame>
      <Hsp_hit-frame>-1</Hsp_hit-frame>
      <Hsp_identity>97</Hsp_identity>
      <Hsp_positive>97</Hsp_positive>
      <Hsp_gaps>3</Hsp_gaps>
      <Hsp_align-len>137</Hsp_align-len>
      <Hsp_qseq>TCTGTTCTTATCAGTTTAATATCTGATACG-TCCTCTAT-CCGAGGACAATATATTAAATGGATTTTTGGAGCAGGGAGATGGAATAGGAGCTTGCTCTGTCCACTCCACGCATCGACCTGGTATTGCAGTACCTCC</Hsp_qseq>
      <Hsp_hseq>TCTGTTCTTATCAGCTTAATATCTGATATGTTAGGCAATGCCTAACTC-ATATATTAAACTGATTTTTGGCCTTCGGCCCTGGGATTGAAGCTTGCTTCGCCCTGGCCACGGGTTGTCTCGGTATTGCACTACATCC</Hsp_hseq>
      <Hsp_midline>|||||||||||||| ||||||||||||| | |   | || || |   | ||||||||||  |||||||||     ||   ||| || | ||||||||  | ||   |||||  | | |  ||||||||| ||| |||</Hsp_midline>
    </Hsp>
    <Hsp>
      <Hsp_num>37</Hsp_num>
      <Hsp_bit-score>56.2891</Hsp_bit-score>
      <Hsp_score>61</Hsp_score>
      <Hsp_evalue>1.23381e-05</Hsp_evalue>
      <Hsp_query-from>1</Hsp_query-from>
      <Hsp_query-to>33</Hsp_query-to>
      <Hsp_hit-from>168420</Hsp_hit-from>
      <Hsp_hit-to>168388</Hsp_hit-to>
      <Hsp_query-frame>1</Hsp_query-frame>
      <Hsp_hit-frame>-1</Hsp_hit-frame>
      <Hsp_identity>32</Hsp_identity>
      <Hsp_positive>32</Hsp_positive>
      <Hsp_gaps>0</Hsp_gaps>
      <Hsp_align-len>33</Hsp_align-len>
      <Hsp_qseq>ATCGCTTCTCGGCCTTTTGGCTAAGATCAAGTG</Hsp_qseq>
      <Hsp_hseq>ATCGCTTCTCGGCCTTTTGGCTAAGATCAATTG</Hsp_hseq>
      <Hsp_midline>|||||||||||||||||||||||||||||| ||</Hsp_midline>
    </Hsp>
    <Hsp>
      <Hsp_num>38</Hsp_num>
      <Hsp_bit-score>55.3874</Hsp_bit-score>
      <Hsp_score>60</Hsp_score>
      <Hsp_evalue>1.23381e-05</Hsp_evalue>
      <Hsp_query-from>39</Hsp_query-from>
      <Hsp_query-to>172</Hsp_query-to>
      <Hsp_hit-from>88679</Hsp_hit-from>
      <Hsp_hit-to>88545</Hsp_hit-to>
      <Hsp_query-frame>1</Hsp_query-frame>
      <Hsp_hit-frame>-1</Hsp_hit-frame>
      <Hsp_identity>96</Hsp_identity>
      <Hsp_positive>96</Hsp_positive>
      <Hsp_gaps>3</Hsp_gaps>
      <Hsp_align-len>136</Hsp_align-len>
      <Hsp_qseq>TCTGTTCTTATCAGTTTAATATCTGATACG-TCCTCTAT-CCGAGGACAATATATTAAATGGATTTTTGGAGCAGGGAGATGGAATAGGAGCTTGCTCTGTCCACTCCACGCATCGACCTGGTATTGCAGTACCTC</Hsp_qseq>
      <Hsp_hseq>TCTGTTCTTATCAGCTTAATATCTGATATGTTAGGCAATGCCTAACTC-ATATATTAAACTGATTTTTGGCCTTCGGCCCTGGGATTGAAGCTTGCTTCGCCCTGGCCACGGGTTGTCTCGGTATTGCACTACATC</Hsp_hseq>
      <Hsp_midline>|||||||||||||| ||||||||||||| | |   | || || |   | ||||||||||  |||||||||     ||   ||| || | ||||||||  | ||   |||||  | | |  ||||||||| ||| ||</Hsp_midline>
    </Hsp>
    <Hsp>
      <Hsp_num>39</Hsp_num>
      <Hsp_bit-score>55.3874</Hsp_bit-score>
      <Hsp_score>60</Hsp_score>
      <Hsp_evalue>1.23381e-05</Hsp_evalue>
      <Hsp_query-from>1</Hsp_query-from>
      <Hsp_query-to>30</Hsp_query-to>
      <Hsp_hit-from>135888</Hsp_hit-from>
      <Hsp_hit-to>135859</Hsp_hit-to>
      <Hsp_query-frame>1</Hsp_query-frame>
      <Hsp_hit-frame>-1</Hsp_hit-frame>
      <Hsp_identity>30</Hsp_identity>
      <Hsp_positive>30</Hsp_positive>
      <Hsp_gaps>0</Hsp_gaps>
      <Hsp_align-len>30</Hsp_align-len>
      <Hsp_qseq>ATCGCTTCTCGGCCTTTTGGCTAAGATCAA</Hsp_qseq>
      <Hsp_hseq>ATCGCTTCTCGGCCTTTTGGCTAAGATCAA</Hsp_hseq>
      <Hsp_midline>||||||||||||||||||||||||||||||</Hsp_midline>
    </Hsp>
    <Hsp>
      <Hsp_num>40</Hsp_num>
      <Hsp_bit-score>54.4857</Hsp_bit-score>
      <Hsp_score>59</Hsp_score>
      <Hsp_evalue>4.30642e-05</Hsp_evalue>
      <Hsp_query-from>39</Hsp_query-from>
      <Hsp_query-to>173</Hsp_query-to>
      <Hsp_hit-from>34008</Hsp_hit-from>
      <Hsp_hit-to>33870</Hsp_hit-to>
      <Hsp_query-frame>1</Hsp_query-frame>
      <Hsp_hit-frame>-1</Hsp_hit-frame>
      <Hsp_identity>100</Hsp_identity>
      <Hsp_positive>100</Hsp_positive>
      <Hsp_gaps>10</Hsp_gaps>
      <Hsp_align-len>142</Hsp_align-len>
      <Hsp_qseq>TCTGTTCTTATCAGTTTAATATCTGATACG-TCCTCTAT-CCGAGGACAATATATTAAATGGATTTTTGGAGCAGGGAGATGGAATAGGAGCTTGCT-----CTGTCCACTCCACGCATCGACCTGGTATTGCAGTACCTCC</Hsp_qseq>
      <Hsp_hseq>TCTGTTCTTATCAGCTTAATATCTGATATGTTAGGCAATGCCTAACTC-ATATATTAAACTGATTTTTGGCCTTCGGCCCTGGGATTGAAGCTTGCTTCGCCCTGGCCA--CCACGGGTTGTCTCGGTATTGCACTACATCC</Hsp_hseq>
      <Hsp_midline>|||||||||||||| ||||||||||||| | |   | || || |   | ||||||||||  |||||||||     ||   ||| || | ||||||||     ||| |||  |||||  | | |  ||||||||| ||| |||</Hsp_midline>
    </Hsp>
    <Hsp>
      <Hsp_num>41</Hsp_num>
      <Hsp_bit-score>52.6823</Hsp_bit-score>
      <Hsp_score>57</Hsp_score>
      <Hsp_evalue>0.000150309</Hsp_evalue>
      <Hsp_query-from>39</Hsp_query-from>
      <Hsp_query-to>173</Hsp_query-to>
      <Hsp_hit-from>64331</Hsp_hit-from>
      <Hsp_hit-to>64196</Hsp_hit-to>
      <Hsp_query-frame>1</Hsp_query-frame>
      <Hsp_hit-frame>-1</Hsp_hit-frame>
      <Hsp_identity>96</Hsp_identity>
      <Hsp_positive>96</Hsp_positive>
      <Hsp_gaps>3</Hsp_gaps>
      <Hsp_align-len>137</Hsp_align-len>
      <Hsp_qseq>TCTGTTCTTATCAGTTTAATATCTGATACG-TCCTCTAT-CCGAGGACAATATATTAAATGGATTTTTGGAGCAGGGAGATGGAATAGGAGCTTGCTCTGTCCACTCCACGCATCGACCTGGTATTGCAGTACCTCC</Hsp_qseq>
      <Hsp_hseq>TCTGTTCTTATCAGCTTAATATCTGATATGTTAGGCAATGCCTAACTC-ATATATTAAACTGATTTTTGGCCTTCGGCCTTGGGATTGAAGCTTGCTTCGCCCTGGCCACGGGTTGTCTCAGTATTGCACTACATCC</Hsp_hseq>
      <Hsp_midline>|||||||||||||| ||||||||||||| | |   | || || |   | ||||||||||  |||||||||     ||   ||| || | ||||||||  | ||   |||||  | | |   |||||||| ||| |||</Hsp_midline>
    </Hsp>
    <Hsp>
      <Hsp_num>42</Hsp_num>
      <Hsp_bit-score>52.6823</Hsp_bit-score>
      <Hsp_score>57</Hsp_score>
      <Hsp_evalue>0.000150309</Hsp_evalue>
      <Hsp_query-from>39</Hsp_query-from>
      <Hsp_query-to>173</Hsp_query-to>
      <Hsp_hit-from>120086</Hsp_hit-from>
      <Hsp_hit-to>119953</Hsp_hit-to>
      <Hsp_query-frame>1</Hsp_query-frame>
      <Hsp_hit-frame>-1</Hsp_hit-frame>
      <Hsp_identity>99</Hsp_identity>
      <Hsp_positive>99</Hsp_positive>
      <Hsp_gaps>9</Hsp_gaps>
      <Hsp_align-len>139</Hsp_align-len>
      <Hsp_qseq>TCTGTTCTTATCAGTTTAATATCTGATACG-TCCTCTAT-CCGAGGACAATATATTAAATGGATTTTTGGAGCAGGGAGATGGAATAGGAGCTTGCTCTGTCCACT--CCACGCATCGACCTGGTATTGCAGTACCTCC</Hsp_qseq>
      <Hsp_hseq>TCTGTTCTTATCAGCTTAATATCTGATATGTTAGGCAATGCCTAACTC-ATATATTAAACTGATTTTTGGCCTTCGGCCCTGG-ATTGAAGCTTGCT---TCCCCTGGCCACGGGTTGTCTCGGTATTGCACTACATCC</Hsp_hseq>
      <Hsp_midline>|||||||||||||| ||||||||||||| | |   | || || |   | ||||||||||  |||||||||     ||   ||| || | ||||||||   ||| ||  |||||  | | |  ||||||||| ||| |||</Hsp_midline>
    </Hsp>
    <Hsp>
      <Hsp_num>43</Hsp_num>
      <Hsp_bit-score>49.9773</Hsp_bit-score>
      <Hsp_score>54</Hsp_score>
      <Hsp_evalue>0.000524629</Hsp_evalue>
      <Hsp_query-from>1</Hsp_query-from>
      <Hsp_query-to>27</Hsp_query-to>
      <Hsp_hit-from>32504</Hsp_hit-from>
      <Hsp_hit-to>32478</Hsp_hit-to>
      <Hsp_query-frame>1</Hsp_query-frame>
      <Hsp_hit-frame>-1</Hsp_hit-frame>
      <Hsp_identity>27</Hsp_identity>
      <Hsp_positive>27</Hsp_positive>
      <Hsp_gaps>0</Hsp_gaps>
      <Hsp_align-len>27</Hsp_align-len>
      <Hsp_qseq>ATCGCTTCTCGGCCTTTTGGCTAAGAT</Hsp_qseq>
      <Hsp_hseq>ATCGCTTCTCGGCCTTTTGGCTAAGAT</Hsp_hseq>
      <Hsp_midline>|||||||||||||||||||||||||||</Hsp_midline>
    </Hsp>
    <Hsp>
      <Hsp_num>44</Hsp_num>
      <Hsp_bit-score>48.1739</Hsp_bit-score>
      <Hsp_score>52</Hsp_score>
      <Hsp_evalue>0.00183114</Hsp_evalue>
      <Hsp_query-from>1</Hsp_query-from>
      <Hsp_query-to>26</Hsp_query-to>
      <Hsp_hit-from>103706</Hsp_hit-from>
      <Hsp_hit-to>103681</Hsp_hit-to>
      <Hsp_query-frame>1</Hsp_query-frame>
      <Hsp_hit-frame>-1</Hsp_hit-frame>
      <Hsp_identity>26</Hsp_identity>
      <Hsp_positive>26</Hsp_positive>
      <Hsp_gaps>0</Hsp_gaps>
      <Hsp_align-len>26</Hsp_align-len>
      <Hsp_qseq>ATCGCTTCTCGGCCTTTTGGCTAAGA</Hsp_qseq>
      <Hsp_hseq>ATCGCTTCTCGGCCTTTTGGCTAAGA</Hsp_hseq>
      <Hsp_midline>||||||||||||||||||||||||||</Hsp_midline>
    </Hsp>
    <Hsp>
      <Hsp_num>45</Hsp_num>
      <Hsp_bit-score>48.1739</Hsp_bit-score>
      <Hsp_score>52</Hsp_score>
      <Hsp_evalue>0.00183114</Hsp_evalue>
      <Hsp_query-from>1</Hsp_query-from>
      <Hsp_query-to>26</Hsp_query-to>
      <Hsp_hit-from>177853</Hsp_hit-from>
      <Hsp_hit-to>177828</Hsp_hit-to>
      <Hsp_query-frame>1</Hsp_query-frame>
      <Hsp_hit-frame>-1</Hsp_hit-frame>
      <Hsp_identity>26</Hsp_identity>
      <Hsp_positive>26</Hsp_positive>
      <Hsp_gaps>0</Hsp_gaps>
      <Hsp_align-len>26</Hsp_align-len>
      <Hsp_qseq>ATCGCTTCTCGGCCTTTTGGCTAAGA</Hsp_qseq>
      <Hsp_hseq>ATCGCTTCTCGGCCTTTTGGCTAAGA</Hsp_hseq>
      <Hsp_midline>||||||||||||||||||||||||||</Hsp_midline>
    </Hsp>
    <Hsp>
      <Hsp_num>46</Hsp_num>
      <Hsp_bit-score>46.3705</Hsp_bit-score>
      <Hsp_score>50</Hsp_score>
      <Hsp_evalue>0.00639129</Hsp_evalue>
      <Hsp_query-from>1</Hsp_query-from>
      <Hsp_query-to>25</Hsp_query-to>
      <Hsp_hit-from>208847</Hsp_hit-from>
      <Hsp_hit-to>208823</Hsp_hit-to>
      <Hsp_query-frame>1</Hsp_query-frame>
      <Hsp_hit-frame>-1</Hsp_hit-frame>
      <Hsp_identity>25</Hsp_identity>
      <Hsp_positive>25</Hsp_positive>
      <Hsp_gaps>0</Hsp_gaps>
      <Hsp_align-len>25</Hsp_align-len>
      <Hsp_qseq>ATCGCTTCTCGGCCTTTTGGCTAAG</Hsp_qseq>
      <Hsp_hseq>ATCGCTTCTCGGCCTTTTGGCTAAG</Hsp_hseq>
      <Hsp_midline>|||||||||||||||||||||||||</Hsp_midline>
    </Hsp>
    <Hsp>
      <Hsp_num>47</Hsp_num>
      <Hsp_bit-score>44.5672</Hsp_bit-score>
      <Hsp_score>48</Hsp_score>
      <Hsp_evalue>0.0223078</Hsp_evalue>
      <Hsp_query-from>1</Hsp_query-from>
      <Hsp_query-to>24</Hsp_query-to>
      <Hsp_hit-from>13329</Hsp_hit-from>
      <Hsp_hit-to>13306</Hsp_hit-to>
      <Hsp_query-frame>1</Hsp_query-frame>
      <Hsp_hit-frame>-1</Hsp_hit-frame>
      <Hsp_identity>24</Hsp_identity>
      <Hsp_positive>24</Hsp_positive>
      <Hsp_gaps>0</Hsp_gaps>
      <Hsp_align-len>24</Hsp_align-len>
      <Hsp_qseq>ATCGCTTCTCGGCCTTTTGGCTAA</Hsp_qseq>
      <Hsp_hseq>ATCGCTTCTCGGCCTTTTGGCTAA</Hsp_hseq>
      <Hsp_midline>||||||||||||||||||||||||</Hsp_midline>
    </Hsp>
    <Hsp>
      <Hsp_num>48</Hsp_num>
      <Hsp_bit-score>37.3537</Hsp_bit-score>
      <Hsp_score>40</Hsp_score>
      <Hsp_evalue>3.31077</Hsp_evalue>
      <Hsp_query-from>1</Hsp_query-from>
      <Hsp_query-to>25</Hsp_query-to>
      <Hsp_hit-from>196088</Hsp_hit-from>
      <Hsp_hit-to>196064</Hsp_hit-to>
      <Hsp_query-frame>1</Hsp_query-frame>
      <Hsp_hit-frame>-1</Hsp_hit-frame>
      <Hsp_identity>23</Hsp_identity>
      <Hsp_positive>23</Hsp_positive>
      <Hsp_gaps>0</Hsp_gaps>
      <Hsp_align-len>25</Hsp_align-len>
      <Hsp_qseq>ATCGCTTCTCGGCCTTTTGGCTAAG</Hsp_qseq>
      <Hsp_hseq>ATCGCTTCTCGGTTTTTTGGCTAAG</Hsp_hseq>
      <Hsp_midline>||||||||||||  |||||||||||</Hsp_midline>
    </Hsp>
  </Hit_hsps>
</Hit>
<Hit>
  <Hit_num>31</Hit_num>
  <Hit_id>gi|1601958492|ref|NW_021163288.1|</Hit_id>
  <Hit_def>Dendronephthya gigantea isolate DGI-Jeju-01 unplaced genomic scaffold, DenGig_1.0 000278F</Hit_def>
  <Hit_accession>NW_021163288</Hit_accession>
  <Hit_len>173171</Hit_len>
  <Hit_hsps>
    <Hsp>
      <Hsp_num>1</Hsp_num>
      <Hsp_bit-score>125.719</Hsp_bit-score>
      <Hsp_score>138</Hsp_score>
      <Hsp_evalue>8.306e-27</Hsp_evalue>
      <Hsp_query-from>1</Hsp_query-from>
      <Hsp_query-to>173</Hsp_query-to>
      <Hsp_hit-from>15653</Hsp_hit-from>
      <Hsp_hit-to>15826</Hsp_hit-to>
      <Hsp_query-frame>1</Hsp_query-frame>
      <Hsp_hit-frame>1</Hsp_hit-frame>
      <Hsp_identity>135</Hsp_identity>
      <Hsp_positive>135</Hsp_positive>
      <Hsp_gaps>3</Hsp_gaps>
      <Hsp_align-len>175</Hsp_align-len>
      <Hsp_qseq>ATCGCTTCTCGGCCTTTTGGCTAAGATCAAGTGTAGTATCTGTTCTTATCAGTTTAATATCTGATACG-TCCTCTAT-CCGAGGACAATATATTAAATGGATTTTTGGAGCAGGGAGATGGAATAGGAGCTTGCTCTGTCCACTCCACGCATCGACCTGGTATTGCAGTACCTCC</Hsp_qseq>
      <Hsp_hseq>ATCGCTTCTCGGCCTTTTGGCTAAGATCAAGTGTAGTATCTGTTCTTATCAGCTTAATATCTGATATGTTAGGCAATGCCTAACTC-ATATATTAAACTGATTTTTGGCCTTCGGCCCTGGGATTGAAGCTTGCTTCGCCCTGGCCACGGGTTGTCTCGGTATTGCACTACATCC</Hsp_hseq>
      <Hsp_midline>|||||||||||||||||||||||||||||||||||||||||||||||||||| ||||||||||||| | |   | || || |   | ||||||||||  |||||||||     ||   ||| || | ||||||||  | ||   |||||  | | |  ||||||||| ||| |||</Hsp_midline>
    </Hsp>
    <Hsp>
      <Hsp_num>2</Hsp_num>
      <Hsp_bit-score>125.719</Hsp_bit-score>
      <Hsp_score>138</Hsp_score>
      <Hsp_evalue>8.306e-27</Hsp_evalue>
      <Hsp_query-from>1</Hsp_query-from>
      <Hsp_query-to>173</Hsp_query-to>
      <Hsp_hit-from>17135</Hsp_hit-from>
      <Hsp_hit-to>17308</Hsp_hit-to>
      <Hsp_query-frame>1</Hsp_query-frame>
      <Hsp_hit-frame>1</Hsp_hit-frame>
      <Hsp_identity>135</Hsp_identity>
      <Hsp_positive>135</Hsp_positive>
      <Hsp_gaps>3</Hsp_gaps>
      <Hsp_align-len>175</Hsp_align-len>
      <Hsp_qseq>ATCGCTTCTCGGCCTTTTGGCTAAGATCAAGTGTAGTATCTGTTCTTATCAGTTTAATATCTGATACG-TCCTCTAT-CCGAGGACAATATATTAAATGGATTTTTGGAGCAGGGAGATGGAATAGGAGCTTGCTCTGTCCACTCCACGCATCGACCTGGTATTGCAGTACCTCC</Hsp_qseq>
      <Hsp_hseq>ATCGCTTCTCGGCCTTTTGGCTAAGATCAAGTGTAGTATCTGTTCTTATCAGCTTAATATCTGATATGTTAGGCAATGCCTAACTC-ATATATTAAACTGATTTTTGGCCTTCGGCCCTGGGATTGAAGCTTGCTTCGCCCTGGCCACGGGTTGTCTCGGTATTGCACTACATCC</Hsp_hseq>
      <Hsp_midline>|||||||||||||||||||||||||||||||||||||||||||||||||||| ||||||||||||| | |   | || || |   | ||||||||||  |||||||||     ||   ||| || | ||||||||  | ||   |||||  | | |  ||||||||| ||| |||</Hsp_midline>
    </Hsp>
    <Hsp>
      <Hsp_num>3</Hsp_num>
      <Hsp_bit-score>115.8</Hsp_bit-score>
      <Hsp_score>127</Hsp_score>
      <Hsp_evalue>1.50176e-23</Hsp_evalue>
      <Hsp_query-from>1</Hsp_query-from>
      <Hsp_query-to>173</Hsp_query-to>
      <Hsp_hit-from>54137</Hsp_hit-from>
      <Hsp_hit-to>54310</Hsp_hit-to>
      <Hsp_query-frame>1</Hsp_query-frame>
      <Hsp_hit-frame>1</Hsp_hit-frame>
      <Hsp_identity>135</Hsp_identity>
      <Hsp_positive>135</Hsp_positive>
      <Hsp_gaps>5</Hsp_gaps>
      <Hsp_align-len>176</Hsp_align-len>
      <Hsp_qseq>ATCGCTTCTCGGCCTTTTGGCTAAGATCAAGTGTAGTATCTGTTCTTATCAGTTTAATATCTGATACG-TCCTCTAT-CCGAGGACAATATATTAAATGGATTTTTGGAGCAGGGAGAT-GGAATAGGAGCTTGCTCTGTCCACTCCACGCATCGACCTGGTATTGCAGTACCTCC</Hsp_qseq>
      <Hsp_hseq>ATCGCTTCTCGGCCTTT-GGCTAAGATCAAGTGTAGTATCTGTTCTTATCAGCTTAATATCTGATATGTTAGGCAATGCCTAACTC-ATATATTAAACTGATTTTTGGCCTTCGGCCCTGGGAATTGAAGCTTGCTTCGCCCTGGCCACGGGTTGTCTCGGTATTGCACTACATCC</Hsp_hseq>
      <Hsp_midline>||||||||||||||||| |||||||||||||||||||||||||||||||||| ||||||||||||| | |   | || || |   | ||||||||||  |||||||||     ||   | ||||| | ||||||||  | ||   |||||  | | |  ||||||||| ||| |||</Hsp_midline>
    </Hsp>
    <Hsp>
      <Hsp_num>4</Hsp_num>
      <Hsp_bit-score>103.177</Hsp_bit-score>
      <Hsp_score>113</Hsp_score>
      <Hsp_evalue>9.47714e-20</Hsp_evalue>
      <Hsp_query-from>1</Hsp_query-from>
      <Hsp_query-to>59</Hsp_query-to>
      <Hsp_hit-from>2267</Hsp_hit-from>
      <Hsp_hit-to>2325</Hsp_hit-to>
      <Hsp_query-frame>1</Hsp_query-frame>
      <Hsp_hit-frame>1</Hsp_hit-frame>
      <Hsp_identity>58</Hsp_identity>
      <Hsp_positive>58</Hsp_positive>
      <Hsp_gaps>0</Hsp_gaps>
      <Hsp_align-len>59</Hsp_align-len>
      <Hsp_qseq>ATCGCTTCTCGGCCTTTTGGCTAAGATCAAGTGTAGTATCTGTTCTTATCAGTTTAATA</Hsp_qseq>
      <Hsp_hseq>ATCGCTTCTCGGCCTTTTGGCTAAGATCAAGTGTAGTATCTGTTCTTATCAGCTTAATA</Hsp_hseq>
      <Hsp_midline>|||||||||||||||||||||||||||||||||||||||||||||||||||| ||||||</Hsp_midline>
    </Hsp>
    <Hsp>
      <Hsp_num>5</Hsp_num>
      <Hsp_bit-score>103.177</Hsp_bit-score>
      <Hsp_score>113</Hsp_score>
      <Hsp_evalue>9.47714e-20</Hsp_evalue>
      <Hsp_query-from>1</Hsp_query-from>
      <Hsp_query-to>59</Hsp_query-to>
      <Hsp_hit-from>18613</Hsp_hit-from>
      <Hsp_hit-to>18671</Hsp_hit-to>
      <Hsp_query-frame>1</Hsp_query-frame>
      <Hsp_hit-frame>1</Hsp_hit-frame>
      <Hsp_identity>58</Hsp_identity>
      <Hsp_positive>58</Hsp_positive>
      <Hsp_gaps>0</Hsp_gaps>
      <Hsp_align-len>59</Hsp_align-len>
      <Hsp_qseq>ATCGCTTCTCGGCCTTTTGGCTAAGATCAAGTGTAGTATCTGTTCTTATCAGTTTAATA</Hsp_qseq>
      <Hsp_hseq>ATCGCTTCTCGGCCTTTTGGCTAAGATCAAGTGTAGTATCTGTTCTTATCAGCTTAATA</Hsp_hseq>
      <Hsp_midline>|||||||||||||||||||||||||||||||||||||||||||||||||||| ||||||</Hsp_midline>
    </Hsp>
    <Hsp>
      <Hsp_num>6</Hsp_num>
      <Hsp_bit-score>87.848</Hsp_bit-score>
      <Hsp_score>96</Hsp_score>
      <Hsp_evalue>2.08748e-15</Hsp_evalue>
      <Hsp_query-from>22</Hsp_query-from>
      <Hsp_query-to>173</Hsp_query-to>
      <Hsp_hit-from>14184</Hsp_hit-from>
      <Hsp_hit-to>14336</Hsp_hit-to>
      <Hsp_query-frame>1</Hsp_query-frame>
      <Hsp_hit-frame>1</Hsp_hit-frame>
      <Hsp_identity>114</Hsp_identity>
      <Hsp_positive>114</Hsp_positive>
      <Hsp_gaps>3</Hsp_gaps>
      <Hsp_align-len>154</Hsp_align-len>
      <Hsp_qseq>TAAGATCAAGTGTAGTATCTGTTCTTATCAGTTTAATATCTGATACG-TCCTCTAT-CCGAGGACAATATATTAAATGGATTTTTGGAGCAGGGAGATGGAATAGGAGCTTGCTCTGTCCACTCCACGCATCGACCTGGTATTGCAGTACCTCC</Hsp_qseq>
      <Hsp_hseq>TAAGATCAAGTGTAGTATCTGTTCTTATCAGCTTAATATCTGATATGTTAGGCAATGCCTAACTC-ATATATTAAACTGATTTTTGGCCTTCGGCCCTGGGATTGAAGCTTGCTTCGCCCTGGCCACGGGTTGTCTCGGTATTGCACTACATCC</Hsp_hseq>
      <Hsp_midline>||||||||||||||||||||||||||||||| ||||||||||||| | |   | || || |   | ||||||||||  |||||||||     ||   ||| || | ||||||||  | ||   |||||  | | |  ||||||||| ||| |||</Hsp_midline>
    </Hsp>
    <Hsp>
      <Hsp_num>7</Hsp_num>
      <Hsp_bit-score>87.848</Hsp_bit-score>
      <Hsp_score>96</Hsp_score>
      <Hsp_evalue>2.08748e-15</Hsp_evalue>
      <Hsp_query-from>22</Hsp_query-from>
      <Hsp_query-to>173</Hsp_query-to>
      <Hsp_hit-from>31045</Hsp_hit-from>
      <Hsp_hit-to>31197</Hsp_hit-to>
      <Hsp_query-frame>1</Hsp_query-frame>
      <Hsp_hit-frame>1</Hsp_hit-frame>
      <Hsp_identity>114</Hsp_identity>
      <Hsp_positive>114</Hsp_positive>
      <Hsp_gaps>3</Hsp_gaps>
      <Hsp_align-len>154</Hsp_align-len>
      <Hsp_qseq>TAAGATCAAGTGTAGTATCTGTTCTTATCAGTTTAATATCTGATACG-TCCTCTAT-CCGAGGACAATATATTAAATGGATTTTTGGAGCAGGGAGATGGAATAGGAGCTTGCTCTGTCCACTCCACGCATCGACCTGGTATTGCAGTACCTCC</Hsp_qseq>
      <Hsp_hseq>TAAGATCAAGTGTAGTATCTGTTCTTATCAGCTTAATATCTGATATGTTAGGCAATGCCTAACTC-ATATATTAAACTGATTTTTGGCCTTCGGCCCTGGGATTGAAGCTTGCTTCGCCCTGGCCACGGGTTGTCTCGGTATTGCACTACATCC</Hsp_hseq>
      <Hsp_midline>||||||||||||||||||||||||||||||| ||||||||||||| | |   | || || |   | ||||||||||  |||||||||     ||   ||| || | ||||||||  | ||   |||||  | | |  ||||||||| ||| |||</Hsp_midline>
    </Hsp>
    <Hsp>
      <Hsp_num>8</Hsp_num>
      <Hsp_bit-score>87.848</Hsp_bit-score>
      <Hsp_score>96</Hsp_score>
      <Hsp_evalue>2.08748e-15</Hsp_evalue>
      <Hsp_query-from>22</Hsp_query-from>
      <Hsp_query-to>173</Hsp_query-to>
      <Hsp_hit-from>64135</Hsp_hit-from>
      <Hsp_hit-to>64287</Hsp_hit-to>
      <Hsp_query-frame>1</Hsp_query-frame>
      <Hsp_hit-frame>1</Hsp_hit-frame>
      <Hsp_identity>114</Hsp_identity>
      <Hsp_positive>114</Hsp_positive>
      <Hsp_gaps>3</Hsp_gaps>
      <Hsp_align-len>154</Hsp_align-len>
      <Hsp_qseq>TAAGATCAAGTGTAGTATCTGTTCTTATCAGTTTAATATCTGATACG-TCCTCTAT-CCGAGGACAATATATTAAATGGATTTTTGGAGCAGGGAGATGGAATAGGAGCTTGCTCTGTCCACTCCACGCATCGACCTGGTATTGCAGTACCTCC</Hsp_qseq>
      <Hsp_hseq>TAAGATCAAGTGTAGTATCTGTTCTTATCAGCTTAATATCTGATATGTTAGGCAATGCCTAACTC-ATATATTAAACTGATTTTTGGCCTTCGGCCCTGGGATTGAAGCTTGCTTCGCCCTGGCCACGGGTTGTCTCGGTATTGCACTACATCC</Hsp_hseq>
      <Hsp_midline>||||||||||||||||||||||||||||||| ||||||||||||| | |   | || || |   | ||||||||||  |||||||||     ||   ||| || | ||||||||  | ||   |||||  | | |  ||||||||| ||| |||</Hsp_midline>
    </Hsp>
    <Hsp>
      <Hsp_num>9</Hsp_num>
      <Hsp_bit-score>87.848</Hsp_bit-score>
      <Hsp_score>96</Hsp_score>
      <Hsp_evalue>2.08748e-15</Hsp_evalue>
      <Hsp_query-from>22</Hsp_query-from>
      <Hsp_query-to>173</Hsp_query-to>
      <Hsp_hit-from>67437</Hsp_hit-from>
      <Hsp_hit-to>67589</Hsp_hit-to>
      <Hsp_query-frame>1</Hsp_query-frame>
      <Hsp_hit-frame>1</Hsp_hit-frame>
      <Hsp_identity>114</Hsp_identity>
      <Hsp_positive>114</Hsp_positive>
      <Hsp_gaps>3</Hsp_gaps>
      <Hsp_align-len>154</Hsp_align-len>
      <Hsp_qseq>TAAGATCAAGTGTAGTATCTGTTCTTATCAGTTTAATATCTGATACG-TCCTCTAT-CCGAGGACAATATATTAAATGGATTTTTGGAGCAGGGAGATGGAATAGGAGCTTGCTCTGTCCACTCCACGCATCGACCTGGTATTGCAGTACCTCC</Hsp_qseq>
      <Hsp_hseq>TAAGATCAAGTGTAGTATCTGTTCTTATCAGCTTAATATCTGATATGTTAGGCAATGCCTAACTC-ATATATTAAACTGATTTTTGGCCTTCGGCCCTGGGATTGAAGCTTGCTTCGCCCTGGCCACGGGTTGTCTCGGTATTGCACTACATCC</Hsp_hseq>
      <Hsp_midline>||||||||||||||||||||||||||||||| ||||||||||||| | |   | || || |   | ||||||||||  |||||||||     ||   ||| || | ||||||||  | ||   |||||  | | |  ||||||||| ||| |||</Hsp_midline>
    </Hsp>
    <Hsp>
      <Hsp_num>10</Hsp_num>
      <Hsp_bit-score>87.848</Hsp_bit-score>
      <Hsp_score>96</Hsp_score>
      <Hsp_evalue>2.08748e-15</Hsp_evalue>
      <Hsp_query-from>22</Hsp_query-from>
      <Hsp_query-to>173</Hsp_query-to>
      <Hsp_hit-from>82643</Hsp_hit-from>
      <Hsp_hit-to>82795</Hsp_hit-to>
      <Hsp_query-frame>1</Hsp_query-frame>
      <Hsp_hit-frame>1</Hsp_hit-frame>
      <Hsp_identity>114</Hsp_identity>
      <Hsp_positive>114</Hsp_positive>
      <Hsp_gaps>3</Hsp_gaps>
      <Hsp_align-len>154</Hsp_align-len>
      <Hsp_qseq>TAAGATCAAGTGTAGTATCTGTTCTTATCAGTTTAATATCTGATACG-TCCTCTAT-CCGAGGACAATATATTAAATGGATTTTTGGAGCAGGGAGATGGAATAGGAGCTTGCTCTGTCCACTCCACGCATCGACCTGGTATTGCAGTACCTCC</Hsp_qseq>
      <Hsp_hseq>TAAGATCAAGTGTAGTATCTGTTCTTATCAGCTTAATATCTGATATGTTAGGCAATGCCTAACTC-ATATATTAAACTGATTTTTGGCCTTCGGCCCTGGGATTGAAGCTTGCTTCGCCCTGGCCACGGGTTGTCTCGGTATTGCACTACATCC</Hsp_hseq>
      <Hsp_midline>||||||||||||||||||||||||||||||| ||||||||||||| | |   | || || |   | ||||||||||  |||||||||     ||   ||| || | ||||||||  | ||   |||||  | | |  ||||||||| ||| |||</Hsp_midline>
    </Hsp>
    <Hsp>
      <Hsp_num>11</Hsp_num>
      <Hsp_bit-score>87.848</Hsp_bit-score>
      <Hsp_score>96</Hsp_score>
      <Hsp_evalue>2.08748e-15</Hsp_evalue>
      <Hsp_query-from>22</Hsp_query-from>
      <Hsp_query-to>173</Hsp_query-to>
      <Hsp_hit-from>89900</Hsp_hit-from>
      <Hsp_hit-to>90052</Hsp_hit-to>
      <Hsp_query-frame>1</Hsp_query-frame>
      <Hsp_hit-frame>1</Hsp_hit-frame>
      <Hsp_identity>114</Hsp_identity>
      <Hsp_positive>114</Hsp_positive>
      <Hsp_gaps>3</Hsp_gaps>
      <Hsp_align-len>154</Hsp_align-len>
      <Hsp_qseq>TAAGATCAAGTGTAGTATCTGTTCTTATCAGTTTAATATCTGATACG-TCCTCTAT-CCGAGGACAATATATTAAATGGATTTTTGGAGCAGGGAGATGGAATAGGAGCTTGCTCTGTCCACTCCACGCATCGACCTGGTATTGCAGTACCTCC</Hsp_qseq>
      <Hsp_hseq>TAAGATCAAGTGTAGTATCTGTTCTTATCAGCTTAATATCTGATATGTTAGGCAATGCCTAACTC-ATATATTAAACTGATTTTTGGCCTTCGGCCCTGGGATTGAAGCTTGCTTCGCCCTGGCCACGGGTTGTCTCGGTATTGCACTACATCC</Hsp_hseq>
      <Hsp_midline>||||||||||||||||||||||||||||||| ||||||||||||| | |   | || || |   | ||||||||||  |||||||||     ||   ||| || | ||||||||  | ||   |||||  | | |  ||||||||| ||| |||</Hsp_midline>
    </Hsp>
    <Hsp>
      <Hsp_num>12</Hsp_num>
      <Hsp_bit-score>87.848</Hsp_bit-score>
      <Hsp_score>96</Hsp_score>
      <Hsp_evalue>2.08748e-15</Hsp_evalue>
      <Hsp_query-from>22</Hsp_query-from>
      <Hsp_query-to>173</Hsp_query-to>
      <Hsp_hit-from>110182</Hsp_hit-from>
      <Hsp_hit-to>110334</Hsp_hit-to>
      <Hsp_query-frame>1</Hsp_query-frame>
      <Hsp_hit-frame>1</Hsp_hit-frame>
      <Hsp_identity>114</Hsp_identity>
      <Hsp_positive>114</Hsp_positive>
      <Hsp_gaps>3</Hsp_gaps>
      <Hsp_align-len>154</Hsp_align-len>
      <Hsp_qseq>TAAGATCAAGTGTAGTATCTGTTCTTATCAGTTTAATATCTGATACG-TCCTCTAT-CCGAGGACAATATATTAAATGGATTTTTGGAGCAGGGAGATGGAATAGGAGCTTGCTCTGTCCACTCCACGCATCGACCTGGTATTGCAGTACCTCC</Hsp_qseq>
      <Hsp_hseq>TAAGATCAAGTGTAGTATCTGTTCTTATCAGCTTAATATCTGATATGTTAGGCAATGCCTAACTC-ATATATTAAACTGATTTTTGGCCTTCGGCCCTGGGATTGAAGCTTGCTTCGCCCTGGCCACGGGTTGTCTCGGTATTGCACTACATCC</Hsp_hseq>
      <Hsp_midline>||||||||||||||||||||||||||||||| ||||||||||||| | |   | || || |   | ||||||||||  |||||||||     ||   ||| || | ||||||||  | ||   |||||  | | |  ||||||||| ||| |||</Hsp_midline>
    </Hsp>
    <Hsp>
      <Hsp_num>13</Hsp_num>
      <Hsp_bit-score>87.848</Hsp_bit-score>
      <Hsp_score>96</Hsp_score>
      <Hsp_evalue>2.08748e-15</Hsp_evalue>
      <Hsp_query-from>22</Hsp_query-from>
      <Hsp_query-to>173</Hsp_query-to>
      <Hsp_hit-from>123794</Hsp_hit-from>
      <Hsp_hit-to>123946</Hsp_hit-to>
      <Hsp_query-frame>1</Hsp_query-frame>
      <Hsp_hit-frame>1</Hsp_hit-frame>
      <Hsp_identity>114</Hsp_identity>
      <Hsp_positive>114</Hsp_positive>
      <Hsp_gaps>3</Hsp_gaps>
      <Hsp_align-len>154</Hsp_align-len>
      <Hsp_qseq>TAAGATCAAGTGTAGTATCTGTTCTTATCAGTTTAATATCTGATACG-TCCTCTAT-CCGAGGACAATATATTAAATGGATTTTTGGAGCAGGGAGATGGAATAGGAGCTTGCTCTGTCCACTCCACGCATCGACCTGGTATTGCAGTACCTCC</Hsp_qseq>
      <Hsp_hseq>TAAGATCAAGTGTAGTATCTGTTCTTATCAGCTTAATATCTGATATGTTAGGCAATGCCTAACTC-ATATATTAAACTGATTTTTGGCCTTCGGTCCTGGGATTGAAGCTTGCTTCGCCCTGGCCACGGGTTGTCTCGGTATTGCACTACATCC</Hsp_hseq>
      <Hsp_midline>||||||||||||||||||||||||||||||| ||||||||||||| | |   | || || |   | ||||||||||  |||||||||     ||   ||| || | ||||||||  | ||   |||||  | | |  ||||||||| ||| |||</Hsp_midline>
    </Hsp>
    <Hsp>
      <Hsp_num>14</Hsp_num>
      <Hsp_bit-score>84.2413</Hsp_bit-score>
      <Hsp_score>92</Hsp_score>
      <Hsp_evalue>2.54307e-14</Hsp_evalue>
      <Hsp_query-from>24</Hsp_query-from>
      <Hsp_query-to>173</Hsp_query-to>
      <Hsp_hit-from>75191</Hsp_hit-from>
      <Hsp_hit-to>75341</Hsp_hit-to>
      <Hsp_query-frame>1</Hsp_query-frame>
      <Hsp_hit-frame>1</Hsp_hit-frame>
      <Hsp_identity>112</Hsp_identity>
      <Hsp_positive>112</Hsp_positive>
      <Hsp_gaps>3</Hsp_gaps>
      <Hsp_align-len>152</Hsp_align-len>
      <Hsp_qseq>AGATCAAGTGTAGTATCTGTTCTTATCAGTTTAATATCTGATACG-TCCTCTAT-CCGAGGACAATATATTAAATGGATTTTTGGAGCAGGGAGATGGAATAGGAGCTTGCTCTGTCCACTCCACGCATCGACCTGGTATTGCAGTACCTCC</Hsp_qseq>
      <Hsp_hseq>AGATCAAGTGTAGTATCTGTTCTTATCAGCTTAATATCTGATATGTTAGGCAATGCCTAACTC-ATATATTAAACTGATTTTTGGCCTTCGGCCCTGGGATTGAAGCTTGCTTCGCCCTGGCCACGGGTTGTCTCGGTATTGCACTACATCC</Hsp_hseq>
      <Hsp_midline>||||||||||||||||||||||||||||| ||||||||||||| | |   | || || |   | ||||||||||  |||||||||     ||   ||| || | ||||||||  | ||   |||||  | | |  ||||||||| ||| |||</Hsp_midline>
    </Hsp>
    <Hsp>
      <Hsp_num>15</Hsp_num>
      <Hsp_bit-score>68.0109</Hsp_bit-score>
      <Hsp_score>74</Hsp_score>
      <Hsp_evalue>1.95511e-09</Hsp_evalue>
      <Hsp_query-from>1</Hsp_query-from>
      <Hsp_query-to>37</Hsp_query-to>
      <Hsp_hit-from>32502</Hsp_hit-from>
      <Hsp_hit-to>32538</Hsp_hit-to>
      <Hsp_query-frame>1</Hsp_query-frame>
      <Hsp_hit-frame>1</Hsp_hit-frame>
      <Hsp_identity>37</Hsp_identity>
      <Hsp_positive>37</Hsp_positive>
      <Hsp_gaps>0</Hsp_gaps>
      <Hsp_align-len>37</Hsp_align-len>
      <Hsp_qseq>ATCGCTTCTCGGCCTTTTGGCTAAGATCAAGTGTAGT</Hsp_qseq>
      <Hsp_hseq>ATCGCTTCTCGGCCTTTTGGCTAAGATCAAGTGTAGT</Hsp_hseq>
      <Hsp_midline>|||||||||||||||||||||||||||||||||||||</Hsp_midline>
    </Hsp>
    <Hsp>
      <Hsp_num>16</Hsp_num>
      <Hsp_bit-score>67.1093</Hsp_bit-score>
      <Hsp_score>73</Hsp_score>
      <Hsp_evalue>6.82401e-09</Hsp_evalue>
      <Hsp_query-from>1</Hsp_query-from>
      <Hsp_query-to>47</Hsp_query-to>
      <Hsp_hit-from>47563</Hsp_hit-from>
      <Hsp_hit-to>47612</Hsp_hit-to>
      <Hsp_query-frame>1</Hsp_query-frame>
      <Hsp_hit-frame>1</Hsp_hit-frame>
      <Hsp_identity>45</Hsp_identity>
      <Hsp_positive>45</Hsp_positive>
      <Hsp_gaps>3</Hsp_gaps>
      <Hsp_align-len>50</Hsp_align-len>
      <Hsp_qseq>ATCGCTTCTCGGCCTTTTGGCTAAGATCAAGTGTA---GTATCTGTTCTT</Hsp_qseq>
      <Hsp_hseq>ATCGCTTCTCGGCCTTTTGGCTAAGATCAAGTGTAGCCGCATTTGTTCTT</Hsp_hseq>
      <Hsp_midline>|||||||||||||||||||||||||||||||||||   | || |||||||</Hsp_midline>
    </Hsp>
    <Hsp>
      <Hsp_num>17</Hsp_num>
      <Hsp_bit-score>66.2076</Hsp_bit-score>
      <Hsp_score>72</Hsp_score>
      <Hsp_evalue>6.82401e-09</Hsp_evalue>
      <Hsp_query-from>1</Hsp_query-from>
      <Hsp_query-to>36</Hsp_query-to>
      <Hsp_hit-from>84151</Hsp_hit-from>
      <Hsp_hit-to>84186</Hsp_hit-to>
      <Hsp_query-frame>1</Hsp_query-frame>
      <Hsp_hit-frame>1</Hsp_hit-frame>
      <Hsp_identity>36</Hsp_identity>
      <Hsp_positive>36</Hsp_positive>
      <Hsp_gaps>0</Hsp_gaps>
      <Hsp_align-len>36</Hsp_align-len>
      <Hsp_qseq>ATCGCTTCTCGGCCTTTTGGCTAAGATCAAGTGTAG</Hsp_qseq>
      <Hsp_hseq>ATCGCTTCTCGGCCTTTTGGCTAAGATCAAGTGTAG</Hsp_hseq>
      <Hsp_midline>||||||||||||||||||||||||||||||||||||</Hsp_midline>
    </Hsp>
    <Hsp>
      <Hsp_num>18</Hsp_num>
      <Hsp_bit-score>66.2076</Hsp_bit-score>
      <Hsp_score>72</Hsp_score>
      <Hsp_evalue>6.82401e-09</Hsp_evalue>
      <Hsp_query-from>1</Hsp_query-from>
      <Hsp_query-to>36</Hsp_query-to>
      <Hsp_hit-from>111656</Hsp_hit-from>
      <Hsp_hit-to>111691</Hsp_hit-to>
      <Hsp_query-frame>1</Hsp_query-frame>
      <Hsp_hit-frame>1</Hsp_hit-frame>
      <Hsp_identity>36</Hsp_identity>
      <Hsp_positive>36</Hsp_positive>
      <Hsp_gaps>0</Hsp_gaps>
      <Hsp_align-len>36</Hsp_align-len>
      <Hsp_qseq>ATCGCTTCTCGGCCTTTTGGCTAAGATCAAGTGTAG</Hsp_qseq>
      <Hsp_hseq>ATCGCTTCTCGGCCTTTTGGCTAAGATCAAGTGTAG</Hsp_hseq>
      <Hsp_midline>||||||||||||||||||||||||||||||||||||</Hsp_midline>
    </Hsp>
    <Hsp>
      <Hsp_num>19</Hsp_num>
      <Hsp_bit-score>64.4042</Hsp_bit-score>
      <Hsp_score>70</Hsp_score>
      <Hsp_evalue>2.38181e-08</Hsp_evalue>
      <Hsp_query-from>35</Hsp_query-from>
      <Hsp_query-to>173</Hsp_query-to>
      <Hsp_hit-from>130748</Hsp_hit-from>
      <Hsp_hit-to>130887</Hsp_hit-to>
      <Hsp_query-frame>1</Hsp_query-frame>
      <Hsp_hit-frame>1</Hsp_hit-frame>
      <Hsp_identity>101</Hsp_identity>
      <Hsp_positive>101</Hsp_positive>
      <Hsp_gaps>3</Hsp_gaps>
      <Hsp_align-len>141</Hsp_align-len>
      <Hsp_qseq>AGTATCTGTTCTTATCAGTTTAATATCTGATACG-TCCTCTAT-CCGAGGACAATATATTAAATGGATTTTTGGAGCAGGGAGATGGAATAGGAGCTTGCTCTGTCCACTCCACGCATCGACCTGGTATTGCAGTACCTCC</Hsp_qseq>
      <Hsp_hseq>AGTATCTGTTCTTATCAGCTTAATATCTGATATGTTAGGCAATGCCTAACTC-ATATATTAAACTGATTTTTGGCCTTCGGCCCTGGGATTGAAGCTTGCTTCGCCCTGGCCACGGGTTGTCTCGGTATTGCACTACATCC</Hsp_hseq>
      <Hsp_midline>|||||||||||||||||| ||||||||||||| | |   | || || |   | ||||||||||  |||||||||     ||   ||| || | ||||||||  | ||   |||||  | | |  ||||||||| ||| |||</Hsp_midline>
    </Hsp>
    <Hsp>
      <Hsp_num>20</Hsp_num>
      <Hsp_bit-score>60.7975</Hsp_bit-score>
      <Hsp_score>66</Hsp_score>
      <Hsp_evalue>2.90164e-07</Hsp_evalue>
      <Hsp_query-from>1</Hsp_query-from>
      <Hsp_query-to>33</Hsp_query-to>
      <Hsp_hit-from>132222</Hsp_hit-from>
      <Hsp_hit-to>132254</Hsp_hit-to>
      <Hsp_query-frame>1</Hsp_query-frame>
      <Hsp_hit-frame>1</Hsp_hit-frame>
      <Hsp_identity>33</Hsp_identity>
      <Hsp_positive>33</Hsp_positive>
      <Hsp_gaps>0</Hsp_gaps>
      <Hsp_align-len>33</Hsp_align-len>
      <Hsp_qseq>ATCGCTTCTCGGCCTTTTGGCTAAGATCAAGTG</Hsp_qseq>
      <Hsp_hseq>ATCGCTTCTCGGCCTTTTGGCTAAGATCAAGTG</Hsp_hseq>
      <Hsp_midline>|||||||||||||||||||||||||||||||||</Hsp_midline>
    </Hsp>
    <Hsp>
      <Hsp_num>21</Hsp_num>
      <Hsp_bit-score>59.8958</Hsp_bit-score>
      <Hsp_score>65</Hsp_score>
      <Hsp_evalue>1.01277e-06</Hsp_evalue>
      <Hsp_query-from>35</Hsp_query-from>
      <Hsp_query-to>173</Hsp_query-to>
      <Hsp_hit-from>819</Hsp_hit-from>
      <Hsp_hit-to>958</Hsp_hit-to>
      <Hsp_query-frame>1</Hsp_query-frame>
      <Hsp_hit-frame>1</Hsp_hit-frame>
      <Hsp_identity>100</Hsp_identity>
      <Hsp_positive>100</Hsp_positive>
      <Hsp_gaps>3</Hsp_gaps>
      <Hsp_align-len>141</Hsp_align-len>
      <Hsp_qseq>AGTATCTGTTCTTATCAGTTTAATATCTGATACG-TCCTCTAT-CCGAGGACAATATATTAAATGGATTTTTGGAGCAGGGAGATGGAATAGGAGCTTGCTCTGTCCACTCCACGCATCGACCTGGTATTGCAGTACCTCC</Hsp_qseq>
      <Hsp_hseq>AGAATCTGTTCTTATCAGCTTAATATCTGATATGTTAGGCAATGCCTAACTC-ATATATTAAACTGATTTTTGGCCTTCGGCCCTGGGATTGAAGCTTGCTTCGCCCTGGCCACGGGTTGTCTCGGTATTGCACTACATCC</Hsp_hseq>
      <Hsp_midline>|| ||||||||||||||| ||||||||||||| | |   | || || |   | ||||||||||  |||||||||     ||   ||| || | ||||||||  | ||   |||||  | | |  ||||||||| ||| |||</Hsp_midline>
    </Hsp>
    <Hsp>
      <Hsp_num>22</Hsp_num>
      <Hsp_bit-score>59.8958</Hsp_bit-score>
      <Hsp_score>65</Hsp_score>
      <Hsp_evalue>1.01277e-06</Hsp_evalue>
      <Hsp_query-from>24</Hsp_query-from>
      <Hsp_query-to>58</Hsp_query-to>
      <Hsp_hit-from>32843</Hsp_hit-from>
      <Hsp_hit-to>32877</Hsp_hit-to>
      <Hsp_query-frame>1</Hsp_query-frame>
      <Hsp_hit-frame>1</Hsp_hit-frame>
      <Hsp_identity>34</Hsp_identity>
      <Hsp_positive>34</Hsp_positive>
      <Hsp_gaps>0</Hsp_gaps>
      <Hsp_align-len>35</Hsp_align-len>
      <Hsp_qseq>AGATCAAGTGTAGTATCTGTTCTTATCAGTTTAAT</Hsp_qseq>
      <Hsp_hseq>AGATCAAGTGTAGTATCTGTTCTTATCAGCTTAAT</Hsp_hseq>
      <Hsp_midline>||||||||||||||||||||||||||||| |||||</Hsp_midline>
    </Hsp>
    <Hsp>
      <Hsp_num>23</Hsp_num>
      <Hsp_bit-score>59.8958</Hsp_bit-score>
      <Hsp_score>65</Hsp_score>
      <Hsp_evalue>1.01277e-06</Hsp_evalue>
      <Hsp_query-from>35</Hsp_query-from>
      <Hsp_query-to>173</Hsp_query-to>
      <Hsp_hit-from>37266</Hsp_hit-from>
      <Hsp_hit-to>37405</Hsp_hit-to>
      <Hsp_query-frame>1</Hsp_query-frame>
      <Hsp_hit-frame>1</Hsp_hit-frame>
      <Hsp_identity>100</Hsp_identity>
      <Hsp_positive>100</Hsp_positive>
      <Hsp_gaps>3</Hsp_gaps>
      <Hsp_align-len>141</Hsp_align-len>
      <Hsp_qseq>AGTATCTGTTCTTATCAGTTTAATATCTGATACG-TCCTCTAT-CCGAGGACAATATATTAAATGGATTTTTGGAGCAGGGAGATGGAATAGGAGCTTGCTCTGTCCACTCCACGCATCGACCTGGTATTGCAGTACCTCC</Hsp_qseq>
      <Hsp_hseq>AGAATCTGTTCTTATCAGCTTAATATCTGATATGTTAGGCAATGCCTAACTC-ATATATTAAACTGATTTTTGGCCTTCGGCCCTGGGATTGAAGCTTGCTTCGCCCTGGCCACGGGTTGTCTCGGTATTGCACTACATCC</Hsp_hseq>
      <Hsp_midline>|| ||||||||||||||| ||||||||||||| | |   | || || |   | ||||||||||  |||||||||     ||   ||| || | ||||||||  | ||   |||||  | | |  ||||||||| ||| |||</Hsp_midline>
    </Hsp>
    <Hsp>
      <Hsp_num>24</Hsp_num>
      <Hsp_bit-score>58.9941</Hsp_bit-score>
      <Hsp_score>64</Hsp_score>
      <Hsp_evalue>1.01277e-06</Hsp_evalue>
      <Hsp_query-from>1</Hsp_query-from>
      <Hsp_query-to>32</Hsp_query-to>
      <Hsp_hit-from>68904</Hsp_hit-from>
      <Hsp_hit-to>68935</Hsp_hit-to>
      <Hsp_query-frame>1</Hsp_query-frame>
      <Hsp_hit-frame>1</Hsp_hit-frame>
      <Hsp_identity>32</Hsp_identity>
      <Hsp_positive>32</Hsp_positive>
      <Hsp_gaps>0</Hsp_gaps>
      <Hsp_align-len>32</Hsp_align-len>
      <Hsp_qseq>ATCGCTTCTCGGCCTTTTGGCTAAGATCAAGT</Hsp_qseq>
      <Hsp_hseq>ATCGCTTCTCGGCCTTTTGGCTAAGATCAAGT</Hsp_hseq>
      <Hsp_midline>||||||||||||||||||||||||||||||||</Hsp_midline>
    </Hsp>
    <Hsp>
      <Hsp_num>25</Hsp_num>
      <Hsp_bit-score>57.1907</Hsp_bit-score>
      <Hsp_score>62</Hsp_score>
      <Hsp_evalue>3.53492e-06</Hsp_evalue>
      <Hsp_query-from>39</Hsp_query-from>
      <Hsp_query-to>173</Hsp_query-to>
      <Hsp_hit-from>6731</Hsp_hit-from>
      <Hsp_hit-to>6866</Hsp_hit-to>
      <Hsp_query-frame>1</Hsp_query-frame>
      <Hsp_hit-frame>1</Hsp_hit-frame>
      <Hsp_identity>97</Hsp_identity>
      <Hsp_positive>97</Hsp_positive>
      <Hsp_gaps>3</Hsp_gaps>
      <Hsp_align-len>137</Hsp_align-len>
      <Hsp_qseq>TCTGTTCTTATCAGTTTAATATCTGATACG-TCCTCTAT-CCGAGGACAATATATTAAATGGATTTTTGGAGCAGGGAGATGGAATAGGAGCTTGCTCTGTCCACTCCACGCATCGACCTGGTATTGCAGTACCTCC</Hsp_qseq>
      <Hsp_hseq>TCTGTTCTTATCAGCTTAATATCTGATATGTTAGGCAATGCCTAACTC-ATATATTAAACTGATTTTTGGCCTTCGGCCCTGGGATTGAAGCTTGCTTCGCCCTGGCCACGGGTTGTCTCGGTATTGCACTACATCC</Hsp_hseq>
      <Hsp_midline>|||||||||||||| ||||||||||||| | |   | || || |   | ||||||||||  |||||||||     ||   ||| || | ||||||||  | ||   |||||  | | |  ||||||||| ||| |||</Hsp_midline>
    </Hsp>
    <Hsp>
      <Hsp_num>26</Hsp_num>
      <Hsp_bit-score>57.1907</Hsp_bit-score>
      <Hsp_score>62</Hsp_score>
      <Hsp_evalue>3.53492e-06</Hsp_evalue>
      <Hsp_query-from>39</Hsp_query-from>
      <Hsp_query-to>173</Hsp_query-to>
      <Hsp_hit-from>23077</Hsp_hit-from>
      <Hsp_hit-to>23212</Hsp_hit-to>
      <Hsp_query-frame>1</Hsp_query-frame>
      <Hsp_hit-frame>1</Hsp_hit-frame>
      <Hsp_identity>97</Hsp_identity>
      <Hsp_positive>97</Hsp_positive>
      <Hsp_gaps>3</Hsp_gaps>
      <Hsp_align-len>137</Hsp_align-len>
      <Hsp_qseq>TCTGTTCTTATCAGTTTAATATCTGATACG-TCCTCTAT-CCGAGGACAATATATTAAATGGATTTTTGGAGCAGGGAGATGGAATAGGAGCTTGCTCTGTCCACTCCACGCATCGACCTGGTATTGCAGTACCTCC</Hsp_qseq>
      <Hsp_hseq>TCTGTTCTTATCAGCTTAATATCTGATATGTTAGGCAATGCCTAACTC-ATATATTAAACTGATTTTTGGCCTTCGGCCCTGGGATTGAAGCTTGCTTCGCCCTGGCCACGGGTTGTCTCGGTATTGCACTACATCC</Hsp_hseq>
      <Hsp_midline>|||||||||||||| ||||||||||||| | |   | || || |   | ||||||||||  |||||||||     ||   ||| || | ||||||||  | ||   |||||  | | |  ||||||||| ||| |||</Hsp_midline>
    </Hsp>
    <Hsp>
      <Hsp_num>27</Hsp_num>
      <Hsp_bit-score>57.1907</Hsp_bit-score>
      <Hsp_score>62</Hsp_score>
      <Hsp_evalue>3.53492e-06</Hsp_evalue>
      <Hsp_query-from>39</Hsp_query-from>
      <Hsp_query-to>173</Hsp_query-to>
      <Hsp_hit-from>52705</Hsp_hit-from>
      <Hsp_hit-to>52840</Hsp_hit-to>
      <Hsp_query-frame>1</Hsp_query-frame>
      <Hsp_hit-frame>1</Hsp_hit-frame>
      <Hsp_identity>97</Hsp_identity>
      <Hsp_positive>97</Hsp_positive>
      <Hsp_gaps>3</Hsp_gaps>
      <Hsp_align-len>137</Hsp_align-len>
      <Hsp_qseq>TCTGTTCTTATCAGTTTAATATCTGATACG-TCCTCTAT-CCGAGGACAATATATTAAATGGATTTTTGGAGCAGGGAGATGGAATAGGAGCTTGCTCTGTCCACTCCACGCATCGACCTGGTATTGCAGTACCTCC</Hsp_qseq>
      <Hsp_hseq>TCTGTTCTTATCAGCTTAATATCTGATATGTTAGGCAATGCCTAACTC-ATATATTAAACTGATTTTTGGCCTTCGGCCCTGGGATTGAAGCTTGCTTCGCCCTGGCCACGGGTTGTCTCGGTATTGCACTACATCC</Hsp_hseq>
      <Hsp_midline>|||||||||||||| ||||||||||||| | |   | || || |   | ||||||||||  |||||||||     ||   ||| || | ||||||||  | ||   |||||  | | |  ||||||||| ||| |||</Hsp_midline>
    </Hsp>
    <Hsp>
      <Hsp_num>28</Hsp_num>
      <Hsp_bit-score>57.1907</Hsp_bit-score>
      <Hsp_score>62</Hsp_score>
      <Hsp_evalue>3.53492e-06</Hsp_evalue>
      <Hsp_query-from>39</Hsp_query-from>
      <Hsp_query-to>173</Hsp_query-to>
      <Hsp_hit-from>116703</Hsp_hit-from>
      <Hsp_hit-to>116838</Hsp_hit-to>
      <Hsp_query-frame>1</Hsp_query-frame>
      <Hsp_hit-frame>1</Hsp_hit-frame>
      <Hsp_identity>97</Hsp_identity>
      <Hsp_positive>97</Hsp_positive>
      <Hsp_gaps>3</Hsp_gaps>
      <Hsp_align-len>137</Hsp_align-len>
      <Hsp_qseq>TCTGTTCTTATCAGTTTAATATCTGATACG-TCCTCTAT-CCGAGGACAATATATTAAATGGATTTTTGGAGCAGGGAGATGGAATAGGAGCTTGCTCTGTCCACTCCACGCATCGACCTGGTATTGCAGTACCTCC</Hsp_qseq>
      <Hsp_hseq>TCTGTTCTTATCAGCTTAATATCTGATATGTTAGGCAATGCCTAACTC-ATATATTAAACTGATTTTTGGCCTTCGGCCCTGGGATTGAAGCTTGCTTCGCCCTGGCCACGGGTTGTCTCGGTATTGCACTACATCC</Hsp_hseq>
      <Hsp_midline>|||||||||||||| ||||||||||||| | |   | || || |   | ||||||||||  |||||||||     ||   ||| || | ||||||||  | ||   |||||  | | |  ||||||||| ||| |||</Hsp_midline>
    </Hsp>
    <Hsp>
      <Hsp_num>29</Hsp_num>
      <Hsp_bit-score>49.9773</Hsp_bit-score>
      <Hsp_score>54</Hsp_score>
      <Hsp_evalue>0.000524629</Hsp_evalue>
      <Hsp_query-from>1</Hsp_query-from>
      <Hsp_query-to>36</Hsp_query-to>
      <Hsp_hit-from>65599</Hsp_hit-from>
      <Hsp_hit-to>65632</Hsp_hit-to>
      <Hsp_query-frame>1</Hsp_query-frame>
      <Hsp_hit-frame>1</Hsp_hit-frame>
      <Hsp_identity>34</Hsp_identity>
      <Hsp_positive>34</Hsp_positive>
      <Hsp_gaps>2</Hsp_gaps>
      <Hsp_align-len>36</Hsp_align-len>
      <Hsp_qseq>ATCGCTTCTCGGCCTTTTGGCTAAGATCAAGTGTAG</Hsp_qseq>
      <Hsp_hseq>ATCGCTTCTCGGCCTTTTGGCT-AGATC-AGTGTAG</Hsp_hseq>
      <Hsp_midline>|||||||||||||||||||||| ||||| |||||||</Hsp_midline>
    </Hsp>
    <Hsp>
      <Hsp_num>30</Hsp_num>
      <Hsp_bit-score>49.9773</Hsp_bit-score>
      <Hsp_score>54</Hsp_score>
      <Hsp_evalue>0.000524629</Hsp_evalue>
      <Hsp_query-from>1</Hsp_query-from>
      <Hsp_query-to>27</Hsp_query-to>
      <Hsp_hit-from>118170</Hsp_hit-from>
      <Hsp_hit-to>118196</Hsp_hit-to>
      <Hsp_query-frame>1</Hsp_query-frame>
      <Hsp_hit-frame>1</Hsp_hit-frame>
      <Hsp_identity>27</Hsp_identity>
      <Hsp_positive>27</Hsp_positive>
      <Hsp_gaps>0</Hsp_gaps>
      <Hsp_align-len>27</Hsp_align-len>
      <Hsp_qseq>ATCGCTTCTCGGCCTTTTGGCTAAGAT</Hsp_qseq>
      <Hsp_hseq>ATCGCTTCTCGGCCTTTTGGCTAAGAT</Hsp_hseq>
      <Hsp_midline>|||||||||||||||||||||||||||</Hsp_midline>
    </Hsp>
    <Hsp>
      <Hsp_num>31</Hsp_num>
      <Hsp_bit-score>48.1739</Hsp_bit-score>
      <Hsp_score>52</Hsp_score>
      <Hsp_evalue>0.00183114</Hsp_evalue>
      <Hsp_query-from>1</Hsp_query-from>
      <Hsp_query-to>26</Hsp_query-to>
      <Hsp_hit-from>24533</Hsp_hit-from>
      <Hsp_hit-to>24558</Hsp_hit-to>
      <Hsp_query-frame>1</Hsp_query-frame>
      <Hsp_hit-frame>1</Hsp_hit-frame>
      <Hsp_identity>26</Hsp_identity>
      <Hsp_positive>26</Hsp_positive>
      <Hsp_gaps>0</Hsp_gaps>
      <Hsp_align-len>26</Hsp_align-len>
      <Hsp_qseq>ATCGCTTCTCGGCCTTTTGGCTAAGA</Hsp_qseq>
      <Hsp_hseq>ATCGCTTCTCGGCCTTTTGGCTAAGA</Hsp_hseq>
      <Hsp_midline>||||||||||||||||||||||||||</Hsp_midline>
    </Hsp>
    <Hsp>
      <Hsp_num>32</Hsp_num>
      <Hsp_bit-score>48.1739</Hsp_bit-score>
      <Hsp_score>52</Hsp_score>
      <Hsp_evalue>0.00183114</Hsp_evalue>
      <Hsp_query-from>1</Hsp_query-from>
      <Hsp_query-to>26</Hsp_query-to>
      <Hsp_hit-from>55618</Hsp_hit-from>
      <Hsp_hit-to>55643</Hsp_hit-to>
      <Hsp_query-frame>1</Hsp_query-frame>
      <Hsp_hit-frame>1</Hsp_hit-frame>
      <Hsp_identity>26</Hsp_identity>
      <Hsp_positive>26</Hsp_positive>
      <Hsp_gaps>0</Hsp_gaps>
      <Hsp_align-len>26</Hsp_align-len>
      <Hsp_qseq>ATCGCTTCTCGGCCTTTTGGCTAAGA</Hsp_qseq>
      <Hsp_hseq>ATCGCTTCTCGGCCTTTTGGCTAAGA</Hsp_hseq>
      <Hsp_midline>||||||||||||||||||||||||||</Hsp_midline>
    </Hsp>
    <Hsp>
      <Hsp_num>33</Hsp_num>
      <Hsp_bit-score>48.1739</Hsp_bit-score>
      <Hsp_score>52</Hsp_score>
      <Hsp_evalue>0.00183114</Hsp_evalue>
      <Hsp_query-from>1</Hsp_query-from>
      <Hsp_query-to>26</Hsp_query-to>
      <Hsp_hit-from>76660</Hsp_hit-from>
      <Hsp_hit-to>76685</Hsp_hit-to>
      <Hsp_query-frame>1</Hsp_query-frame>
      <Hsp_hit-frame>1</Hsp_hit-frame>
      <Hsp_identity>26</Hsp_identity>
      <Hsp_positive>26</Hsp_positive>
      <Hsp_gaps>0</Hsp_gaps>
      <Hsp_align-len>26</Hsp_align-len>
      <Hsp_qseq>ATCGCTTCTCGGCCTTTTGGCTAAGA</Hsp_qseq>
      <Hsp_hseq>ATCGCTTCTCGGCCTTTTGGCTAAGA</Hsp_hseq>
      <Hsp_midline>||||||||||||||||||||||||||</Hsp_midline>
    </Hsp>
    <Hsp>
      <Hsp_num>34</Hsp_num>
      <Hsp_bit-score>48.1739</Hsp_bit-score>
      <Hsp_score>52</Hsp_score>
      <Hsp_evalue>0.00183114</Hsp_evalue>
      <Hsp_query-from>1</Hsp_query-from>
      <Hsp_query-to>26</Hsp_query-to>
      <Hsp_hit-from>103669</Hsp_hit-from>
      <Hsp_hit-to>103694</Hsp_hit-to>
      <Hsp_query-frame>1</Hsp_query-frame>
      <Hsp_hit-frame>1</Hsp_hit-frame>
      <Hsp_identity>26</Hsp_identity>
      <Hsp_positive>26</Hsp_positive>
      <Hsp_gaps>0</Hsp_gaps>
      <Hsp_align-len>26</Hsp_align-len>
      <Hsp_qseq>ATCGCTTCTCGGCCTTTTGGCTAAGA</Hsp_qseq>
      <Hsp_hseq>ATCGCTTCTCGGCCTTTTGGCTAAGA</Hsp_hseq>
      <Hsp_midline>||||||||||||||||||||||||||</Hsp_midline>
    </Hsp>
    <Hsp>
      <Hsp_num>35</Hsp_num>
      <Hsp_bit-score>47.2722</Hsp_bit-score>
      <Hsp_score>51</Hsp_score>
      <Hsp_evalue>0.00639129</Hsp_evalue>
      <Hsp_query-from>1</Hsp_query-from>
      <Hsp_query-to>28</Hsp_query-to>
      <Hsp_hit-from>8177</Hsp_hit-from>
      <Hsp_hit-to>8204</Hsp_hit-to>
      <Hsp_query-frame>1</Hsp_query-frame>
      <Hsp_hit-frame>1</Hsp_hit-frame>
      <Hsp_identity>27</Hsp_identity>
      <Hsp_positive>27</Hsp_positive>
      <Hsp_gaps>0</Hsp_gaps>
      <Hsp_align-len>28</Hsp_align-len>
      <Hsp_qseq>ATCGCTTCTCGGCCTTTTGGCTAAGATC</Hsp_qseq>
      <Hsp_hseq>ATCGCTTCTCGGCCTTTTGGCTAATATC</Hsp_hseq>
      <Hsp_midline>|||||||||||||||||||||||| |||</Hsp_midline>
    </Hsp>
    <Hsp>
      <Hsp_num>36</Hsp_num>
      <Hsp_bit-score>41.8621</Hsp_bit-score>
      <Hsp_score>45</Hsp_score>
      <Hsp_evalue>0.271765</Hsp_evalue>
      <Hsp_query-from>1</Hsp_query-from>
      <Hsp_query-to>25</Hsp_query-to>
      <Hsp_hit-from>125273</Hsp_hit-from>
      <Hsp_hit-to>125297</Hsp_hit-to>
      <Hsp_query-frame>1</Hsp_query-frame>
      <Hsp_hit-frame>1</Hsp_hit-frame>
      <Hsp_identity>24</Hsp_identity>
      <Hsp_positive>24</Hsp_positive>
      <Hsp_gaps>0</Hsp_gaps>
      <Hsp_align-len>25</Hsp_align-len>
      <Hsp_qseq>ATCGCTTCTCGGCCTTTTGGCTAAG</Hsp_qseq>
      <Hsp_hseq>ATCGCTTCTCGGCCTTTTGGCTCAG</Hsp_hseq>
      <Hsp_midline>|||||||||||||||||||||| ||</Hsp_midline>
    </Hsp>
  </Hit_hsps>
</Hit>
<Hit>
  <Hit_num>32</Hit_num>
  <Hit_id>gi|1601958363|ref|NW_021163415.1|</Hit_id>
  <Hit_def>Dendronephthya gigantea isolate DGI-Jeju-01 unplaced genomic scaffold, DenGig_1.0 000405F</Hit_def>
  <Hit_accession>NW_021163415</Hit_accession>
  <Hit_len>76971</Hit_len>
  <Hit_hsps>
    <Hsp>
      <Hsp_num>1</Hsp_num>
      <Hsp_bit-score>125.719</Hsp_bit-score>
      <Hsp_score>138</Hsp_score>
      <Hsp_evalue>8.306e-27</Hsp_evalue>
      <Hsp_query-from>1</Hsp_query-from>
      <Hsp_query-to>173</Hsp_query-to>
      <Hsp_hit-from>70691</Hsp_hit-from>
      <Hsp_hit-to>70864</Hsp_hit-to>
      <Hsp_query-frame>1</Hsp_query-frame>
      <Hsp_hit-frame>1</Hsp_hit-frame>
      <Hsp_identity>135</Hsp_identity>
      <Hsp_positive>135</Hsp_positive>
      <Hsp_gaps>3</Hsp_gaps>
      <Hsp_align-len>175</Hsp_align-len>
      <Hsp_qseq>ATCGCTTCTCGGCCTTTTGGCTAAGATCAAGTGTAGTATCTGTTCTTATCAGTTTAATATCTGATACG-TCCTCTAT-CCGAGGACAATATATTAAATGGATTTTTGGAGCAGGGAGATGGAATAGGAGCTTGCTCTGTCCACTCCACGCATCGACCTGGTATTGCAGTACCTCC</Hsp_qseq>
      <Hsp_hseq>ATCGCTTCTCGGCCTTTTGGCTAAGATCAAGTGTAGTATCTGTTCTTATCAGCTTAATATCTGATATGTTAGGCAATGCCTAACTC-ATATATTAAACTGATTTTTGGCCTTCGGCCCTGGGATTGAAGCTTGCTTCGCCCTGGCCACGGGTTGTCTCGGTATTGCACTACATCC</Hsp_hseq>
      <Hsp_midline>|||||||||||||||||||||||||||||||||||||||||||||||||||| ||||||||||||| | |   | || || |   | ||||||||||  |||||||||     ||   ||| || | ||||||||  | ||   |||||  | | |  ||||||||| ||| |||</Hsp_midline>
    </Hsp>
    <Hsp>
      <Hsp_num>2</Hsp_num>
      <Hsp_bit-score>125.719</Hsp_bit-score>
      <Hsp_score>138</Hsp_score>
      <Hsp_evalue>8.306e-27</Hsp_evalue>
      <Hsp_query-from>1</Hsp_query-from>
      <Hsp_query-to>173</Hsp_query-to>
      <Hsp_hit-from>72187</Hsp_hit-from>
      <Hsp_hit-to>72360</Hsp_hit-to>
      <Hsp_query-frame>1</Hsp_query-frame>
      <Hsp_hit-frame>1</Hsp_hit-frame>
      <Hsp_identity>135</Hsp_identity>
      <Hsp_positive>135</Hsp_positive>
      <Hsp_gaps>3</Hsp_gaps>
      <Hsp_align-len>175</Hsp_align-len>
      <Hsp_qseq>ATCGCTTCTCGGCCTTTTGGCTAAGATCAAGTGTAGTATCTGTTCTTATCAGTTTAATATCTGATACG-TCCTCTAT-CCGAGGACAATATATTAAATGGATTTTTGGAGCAGGGAGATGGAATAGGAGCTTGCTCTGTCCACTCCACGCATCGACCTGGTATTGCAGTACCTCC</Hsp_qseq>
      <Hsp_hseq>ATCGCTTCTCGGCCTTTTGGCTAAGATCAAGTGTAGTATCTGTTCTTATCAGCTTAATATCTGATATGTTAGGCAATGCCTAACTC-ATATATTAAACTGATTTTTGGCCTTCGGCCCTGGGATTGAAGCTTGCTTCGCCCTGGCCACGGGTTGTCTCGGTATTGCACTACATCC</Hsp_hseq>
      <Hsp_midline>|||||||||||||||||||||||||||||||||||||||||||||||||||| ||||||||||||| | |   | || || |   | ||||||||||  |||||||||     ||   ||| || | ||||||||  | ||   |||||  | | |  ||||||||| ||| |||</Hsp_midline>
    </Hsp>
    <Hsp>
      <Hsp_num>3</Hsp_num>
      <Hsp_bit-score>125.719</Hsp_bit-score>
      <Hsp_score>138</Hsp_score>
      <Hsp_evalue>8.306e-27</Hsp_evalue>
      <Hsp_query-from>1</Hsp_query-from>
      <Hsp_query-to>173</Hsp_query-to>
      <Hsp_hit-from>73685</Hsp_hit-from>
      <Hsp_hit-to>73858</Hsp_hit-to>
      <Hsp_query-frame>1</Hsp_query-frame>
      <Hsp_hit-frame>1</Hsp_hit-frame>
      <Hsp_identity>135</Hsp_identity>
      <Hsp_positive>135</Hsp_positive>
      <Hsp_gaps>3</Hsp_gaps>
      <Hsp_align-len>175</Hsp_align-len>
      <Hsp_qseq>ATCGCTTCTCGGCCTTTTGGCTAAGATCAAGTGTAGTATCTGTTCTTATCAGTTTAATATCTGATACG-TCCTCTAT-CCGAGGACAATATATTAAATGGATTTTTGGAGCAGGGAGATGGAATAGGAGCTTGCTCTGTCCACTCCACGCATCGACCTGGTATTGCAGTACCTCC</Hsp_qseq>
      <Hsp_hseq>ATCGCTTCTCGGCCTTTTGGCTAAGATCAAGTGTAGTATCTGTTCTTATCAGCTTAATATCTGATATGTTAGGCAATGCCTAACTC-ATATATTAAACTGATTTTTGGCCTTCGGCCCTGGGATTGAAGCTTGCTTCGCCCTGGCCACGGGTTGTCTCGGTATTGCACTACATCC</Hsp_hseq>
      <Hsp_midline>|||||||||||||||||||||||||||||||||||||||||||||||||||| ||||||||||||| | |   | || || |   | ||||||||||  |||||||||     ||   ||| || | ||||||||  | ||   |||||  | | |  ||||||||| ||| |||</Hsp_midline>
    </Hsp>
    <Hsp>
      <Hsp_num>4</Hsp_num>
      <Hsp_bit-score>125.719</Hsp_bit-score>
      <Hsp_score>138</Hsp_score>
      <Hsp_evalue>8.306e-27</Hsp_evalue>
      <Hsp_query-from>1</Hsp_query-from>
      <Hsp_query-to>173</Hsp_query-to>
      <Hsp_hit-from>75184</Hsp_hit-from>
      <Hsp_hit-to>75357</Hsp_hit-to>
      <Hsp_query-frame>1</Hsp_query-frame>
      <Hsp_hit-frame>1</Hsp_hit-frame>
      <Hsp_identity>135</Hsp_identity>
      <Hsp_positive>135</Hsp_positive>
      <Hsp_gaps>3</Hsp_gaps>
      <Hsp_align-len>175</Hsp_align-len>
      <Hsp_qseq>ATCGCTTCTCGGCCTTTTGGCTAAGATCAAGTGTAGTATCTGTTCTTATCAGTTTAATATCTGATACG-TCCTCTAT-CCGAGGACAATATATTAAATGGATTTTTGGAGCAGGGAGATGGAATAGGAGCTTGCTCTGTCCACTCCACGCATCGACCTGGTATTGCAGTACCTCC</Hsp_qseq>
      <Hsp_hseq>ATCGCTTCTCGGCCTTTTGGCTAAGATCAAGTGTAGTATCTGTTCTTATCAGCTTAATATCTGATATGTTAGGCAATGCCTAACTC-ATATATTAAACTGATTTTTGGCCTTCGGCCCTGGGATTGAAGCTTGCTTCGCCCTGGCCACGGGTTGTCTCGGTATTGCACTACATCC</Hsp_hseq>
      <Hsp_midline>|||||||||||||||||||||||||||||||||||||||||||||||||||| ||||||||||||| | |   | || || |   | ||||||||||  |||||||||     ||   ||| || | ||||||||  | ||   |||||  | | |  ||||||||| ||| |||</Hsp_midline>
    </Hsp>
    <Hsp>
      <Hsp_num>5</Hsp_num>
      <Hsp_bit-score>125.719</Hsp_bit-score>
      <Hsp_score>138</Hsp_score>
      <Hsp_evalue>8.306e-27</Hsp_evalue>
      <Hsp_query-from>1</Hsp_query-from>
      <Hsp_query-to>173</Hsp_query-to>
      <Hsp_hit-from>76682</Hsp_hit-from>
      <Hsp_hit-to>76855</Hsp_hit-to>
      <Hsp_query-frame>1</Hsp_query-frame>
      <Hsp_hit-frame>1</Hsp_hit-frame>
      <Hsp_identity>135</Hsp_identity>
      <Hsp_positive>135</Hsp_positive>
      <Hsp_gaps>3</Hsp_gaps>
      <Hsp_align-len>175</Hsp_align-len>
      <Hsp_qseq>ATCGCTTCTCGGCCTTTTGGCTAAGATCAAGTGTAGTATCTGTTCTTATCAGTTTAATATCTGATACG-TCCTCTAT-CCGAGGACAATATATTAAATGGATTTTTGGAGCAGGGAGATGGAATAGGAGCTTGCTCTGTCCACTCCACGCATCGACCTGGTATTGCAGTACCTCC</Hsp_qseq>
      <Hsp_hseq>ATCGCTTCTCGGCCTTTTGGCTAAGATCAAGTGTAGTATCTGTTCTTATCAGCTTAATATCTGATATGTTAGGCAATGCCTAACTC-ATATATTAAACTGATTTTTGGCCTTCGGCCCTGGGATTGAAGCTTGCTTCGCCCTGGCCACGGGTTGTCTCGGTATTGCACTACATCC</Hsp_hseq>
      <Hsp_midline>|||||||||||||||||||||||||||||||||||||||||||||||||||| ||||||||||||| | |   | || || |   | ||||||||||  |||||||||     ||   ||| || | ||||||||  | ||   |||||  | | |  ||||||||| ||| |||</Hsp_midline>
    </Hsp>
    <Hsp>
      <Hsp_num>6</Hsp_num>
      <Hsp_bit-score>96.8649</Hsp_bit-score>
      <Hsp_score>106</Hsp_score>
      <Hsp_evalue>4.02978e-18</Hsp_evalue>
      <Hsp_query-from>17</Hsp_query-from>
      <Hsp_query-to>173</Hsp_query-to>
      <Hsp_hit-from>69209</Hsp_hit-from>
      <Hsp_hit-to>69366</Hsp_hit-to>
      <Hsp_query-frame>1</Hsp_query-frame>
      <Hsp_hit-frame>1</Hsp_hit-frame>
      <Hsp_identity>119</Hsp_identity>
      <Hsp_positive>119</Hsp_positive>
      <Hsp_gaps>3</Hsp_gaps>
      <Hsp_align-len>159</Hsp_align-len>
      <Hsp_qseq>TTGGCTAAGATCAAGTGTAGTATCTGTTCTTATCAGTTTAATATCTGATACG-TCCTCTAT-CCGAGGACAATATATTAAATGGATTTTTGGAGCAGGGAGATGGAATAGGAGCTTGCTCTGTCCACTCCACGCATCGACCTGGTATTGCAGTACCTCC</Hsp_qseq>
      <Hsp_hseq>TTGGCTAAGATCAAGTGTAGTATCTGTTCTTATCAGCTTAATATCTGATATGTTAGGCAATGCCTAACTC-ATATATTAAACTGATTTTTGGCCTTCGGCCCTGGGATTGAAGCTTGCTTCGCCCTGGCCACGGGTTGTCTCGGTATTGCACTACATCC</Hsp_hseq>
      <Hsp_midline>|||||||||||||||||||||||||||||||||||| ||||||||||||| | |   | || || |   | ||||||||||  |||||||||     ||   ||| || | ||||||||  | ||   |||||  | | |  ||||||||| ||| |||</Hsp_midline>
    </Hsp>
  </Hit_hsps>
</Hit>
<Hit>
  <Hit_num>33</Hit_num>
  <Hit_id>gi|1601957827|ref|NW_021163941.1|</Hit_id>
  <Hit_def>Dendronephthya gigantea isolate DGI-Jeju-01 unplaced genomic scaffold, DenGig_1.0 000931F</Hit_def>
  <Hit_accession>NW_021163941</Hit_accession>
  <Hit_len>17736</Hit_len>
  <Hit_hsps>
    <Hsp>
      <Hsp_num>1</Hsp_num>
      <Hsp_bit-score>125.719</Hsp_bit-score>
      <Hsp_score>138</Hsp_score>
      <Hsp_evalue>8.306e-27</Hsp_evalue>
      <Hsp_query-from>1</Hsp_query-from>
      <Hsp_query-to>173</Hsp_query-to>
      <Hsp_hit-from>1761</Hsp_hit-from>
      <Hsp_hit-to>1934</Hsp_hit-to>
      <Hsp_query-frame>1</Hsp_query-frame>
      <Hsp_hit-frame>1</Hsp_hit-frame>
      <Hsp_identity>135</Hsp_identity>
      <Hsp_positive>135</Hsp_positive>
      <Hsp_gaps>3</Hsp_gaps>
      <Hsp_align-len>175</Hsp_align-len>
      <Hsp_qseq>ATCGCTTCTCGGCCTTTTGGCTAAGATCAAGTGTAGTATCTGTTCTTATCAGTTTAATATCTGATACG-TCCTCTAT-CCGAGGACAATATATTAAATGGATTTTTGGAGCAGGGAGATGGAATAGGAGCTTGCTCTGTCCACTCCACGCATCGACCTGGTATTGCAGTACCTCC</Hsp_qseq>
      <Hsp_hseq>ATCGCTTCTCGGCCTTTTGGCTAAGATCAAGTGTAGTATCTGTTCTTATCAGCTTAATATCTGATATGTTAGGCAATGCCTAACTC-ATATATTAAACTGATTTTTGGCCTTCGGCCCTGGGATTGAAGCTTGCTTCGCCCTGGCCACGGGTTGTCTCGGTATTGCACTACATCC</Hsp_hseq>
      <Hsp_midline>|||||||||||||||||||||||||||||||||||||||||||||||||||| ||||||||||||| | |   | || || |   | ||||||||||  |||||||||     ||   ||| || | ||||||||  | ||   |||||  | | |  ||||||||| ||| |||</Hsp_midline>
    </Hsp>
    <Hsp>
      <Hsp_num>2</Hsp_num>
      <Hsp_bit-score>125.719</Hsp_bit-score>
      <Hsp_score>138</Hsp_score>
      <Hsp_evalue>8.306e-27</Hsp_evalue>
      <Hsp_query-from>1</Hsp_query-from>
      <Hsp_query-to>173</Hsp_query-to>
      <Hsp_hit-from>3256</Hsp_hit-from>
      <Hsp_hit-to>3429</Hsp_hit-to>
      <Hsp_query-frame>1</Hsp_query-frame>
      <Hsp_hit-frame>1</Hsp_hit-frame>
      <Hsp_identity>135</Hsp_identity>
      <Hsp_positive>135</Hsp_positive>
      <Hsp_gaps>3</Hsp_gaps>
      <Hsp_align-len>175</Hsp_align-len>
      <Hsp_qseq>ATCGCTTCTCGGCCTTTTGGCTAAGATCAAGTGTAGTATCTGTTCTTATCAGTTTAATATCTGATACG-TCCTCTAT-CCGAGGACAATATATTAAATGGATTTTTGGAGCAGGGAGATGGAATAGGAGCTTGCTCTGTCCACTCCACGCATCGACCTGGTATTGCAGTACCTCC</Hsp_qseq>
      <Hsp_hseq>ATCGCTTCTCGGCCTTTTGGCTAAGATCAAGTGTAGTATCTGTTCTTATCAGCTTAATATCTGATATGTTAGGCAATGCCTAACTC-ATATATTAAACTGATTTTTGGCCTTCGGCCCTGGGATTGAAGCTTGCTTCGCCCTGGCCACGGGTTGTCTCGGTATTGCACTACATCC</Hsp_hseq>
      <Hsp_midline>|||||||||||||||||||||||||||||||||||||||||||||||||||| ||||||||||||| | |   | || || |   | ||||||||||  |||||||||     ||   ||| || | ||||||||  | ||   |||||  | | |  ||||||||| ||| |||</Hsp_midline>
    </Hsp>
    <Hsp>
      <Hsp_num>3</Hsp_num>
      <Hsp_bit-score>125.719</Hsp_bit-score>
      <Hsp_score>138</Hsp_score>
      <Hsp_evalue>8.306e-27</Hsp_evalue>
      <Hsp_query-from>1</Hsp_query-from>
      <Hsp_query-to>173</Hsp_query-to>
      <Hsp_hit-from>6252</Hsp_hit-from>
      <Hsp_hit-to>6425</Hsp_hit-to>
      <Hsp_query-frame>1</Hsp_query-frame>
      <Hsp_hit-frame>1</Hsp_hit-frame>
      <Hsp_identity>135</Hsp_identity>
      <Hsp_positive>135</Hsp_positive>
      <Hsp_gaps>3</Hsp_gaps>
      <Hsp_align-len>175</Hsp_align-len>
      <Hsp_qseq>ATCGCTTCTCGGCCTTTTGGCTAAGATCAAGTGTAGTATCTGTTCTTATCAGTTTAATATCTGATACG-TCCTCTAT-CCGAGGACAATATATTAAATGGATTTTTGGAGCAGGGAGATGGAATAGGAGCTTGCTCTGTCCACTCCACGCATCGACCTGGTATTGCAGTACCTCC</Hsp_qseq>
      <Hsp_hseq>ATCGCTTCTCGGCCTTTTGGCTAAGATCAAGTGTAGTATCTGTTCTTATCAGCTTAATATCTGATATGTTAGGCAATGCCTAACTC-ATATATTAAACTGATTTTTGGCCTTCGGCCCTGGGATTGAAGCTTGCTTCGCCCTGGCCACGGGTTGTCTCGGTATTGCACTACATCC</Hsp_hseq>
      <Hsp_midline>|||||||||||||||||||||||||||||||||||||||||||||||||||| ||||||||||||| | |   | || || |   | ||||||||||  |||||||||     ||   ||| || | ||||||||  | ||   |||||  | | |  ||||||||| ||| |||</Hsp_midline>
    </Hsp>
    <Hsp>
      <Hsp_num>4</Hsp_num>
      <Hsp_bit-score>125.719</Hsp_bit-score>
      <Hsp_score>138</Hsp_score>
      <Hsp_evalue>8.306e-27</Hsp_evalue>
      <Hsp_query-from>1</Hsp_query-from>
      <Hsp_query-to>173</Hsp_query-to>
      <Hsp_hit-from>7750</Hsp_hit-from>
      <Hsp_hit-to>7923</Hsp_hit-to>
      <Hsp_query-frame>1</Hsp_query-frame>
      <Hsp_hit-frame>1</Hsp_hit-frame>
      <Hsp_identity>135</Hsp_identity>
      <Hsp_positive>135</Hsp_positive>
      <Hsp_gaps>3</Hsp_gaps>
      <Hsp_align-len>175</Hsp_align-len>
      <Hsp_qseq>ATCGCTTCTCGGCCTTTTGGCTAAGATCAAGTGTAGTATCTGTTCTTATCAGTTTAATATCTGATACG-TCCTCTAT-CCGAGGACAATATATTAAATGGATTTTTGGAGCAGGGAGATGGAATAGGAGCTTGCTCTGTCCACTCCACGCATCGACCTGGTATTGCAGTACCTCC</Hsp_qseq>
      <Hsp_hseq>ATCGCTTCTCGGCCTTTTGGCTAAGATCAAGTGTAGTATCTGTTCTTATCAGCTTAATATCTGATATGTTAGGCAATGCCTAACTC-ATATATTAAACTGATTTTTGGCCTTCGGCCCTGGGATTGAAGCTTGCTTCGCCCTGGCCACGGGTTGTCTCGGTATTGCACTACATCC</Hsp_hseq>
      <Hsp_midline>|||||||||||||||||||||||||||||||||||||||||||||||||||| ||||||||||||| | |   | || || |   | ||||||||||  |||||||||     ||   ||| || | ||||||||  | ||   |||||  | | |  ||||||||| ||| |||</Hsp_midline>
    </Hsp>
    <Hsp>
      <Hsp_num>5</Hsp_num>
      <Hsp_bit-score>125.719</Hsp_bit-score>
      <Hsp_score>138</Hsp_score>
      <Hsp_evalue>8.306e-27</Hsp_evalue>
      <Hsp_query-from>1</Hsp_query-from>
      <Hsp_query-to>173</Hsp_query-to>
      <Hsp_hit-from>11057</Hsp_hit-from>
      <Hsp_hit-to>11230</Hsp_hit-to>
      <Hsp_query-frame>1</Hsp_query-frame>
      <Hsp_hit-frame>1</Hsp_hit-frame>
      <Hsp_identity>135</Hsp_identity>
      <Hsp_positive>135</Hsp_positive>
      <Hsp_gaps>3</Hsp_gaps>
      <Hsp_align-len>175</Hsp_align-len>
      <Hsp_qseq>ATCGCTTCTCGGCCTTTTGGCTAAGATCAAGTGTAGTATCTGTTCTTATCAGTTTAATATCTGATACG-TCCTCTAT-CCGAGGACAATATATTAAATGGATTTTTGGAGCAGGGAGATGGAATAGGAGCTTGCTCTGTCCACTCCACGCATCGACCTGGTATTGCAGTACCTCC</Hsp_qseq>
      <Hsp_hseq>ATCGCTTCTCGGCCTTTTGGCTAAGATCAAGTGTAGTATCTGTTCTTATCAGCTTAATATCTGATATGTTAGGCAATGCCTAACTC-ATATATTAAACTGATTTTTGGCCTTCGGCCCTGGGATTGAAGCTTGCTTCGCCCTGGCCACGGGTTGTCTCGGTATTGCACTACATCC</Hsp_hseq>
      <Hsp_midline>|||||||||||||||||||||||||||||||||||||||||||||||||||| ||||||||||||| | |   | || || |   | ||||||||||  |||||||||     ||   ||| || | ||||||||  | ||   |||||  | | |  ||||||||| ||| |||</Hsp_midline>
    </Hsp>
    <Hsp>
      <Hsp_num>6</Hsp_num>
      <Hsp_bit-score>125.719</Hsp_bit-score>
      <Hsp_score>138</Hsp_score>
      <Hsp_evalue>8.306e-27</Hsp_evalue>
      <Hsp_query-from>1</Hsp_query-from>
      <Hsp_query-to>173</Hsp_query-to>
      <Hsp_hit-from>14043</Hsp_hit-from>
      <Hsp_hit-to>14216</Hsp_hit-to>
      <Hsp_query-frame>1</Hsp_query-frame>
      <Hsp_hit-frame>1</Hsp_hit-frame>
      <Hsp_identity>135</Hsp_identity>
      <Hsp_positive>135</Hsp_positive>
      <Hsp_gaps>3</Hsp_gaps>
      <Hsp_align-len>175</Hsp_align-len>
      <Hsp_qseq>ATCGCTTCTCGGCCTTTTGGCTAAGATCAAGTGTAGTATCTGTTCTTATCAGTTTAATATCTGATACG-TCCTCTAT-CCGAGGACAATATATTAAATGGATTTTTGGAGCAGGGAGATGGAATAGGAGCTTGCTCTGTCCACTCCACGCATCGACCTGGTATTGCAGTACCTCC</Hsp_qseq>
      <Hsp_hseq>ATCGCTTCTCGGCCTTTTGGCTAAGATCAAGTGTAGTATCTGTTCTTATCAGCTTAATATCTGATATGTTAGGCAATGCCTAACTC-ATATATTAAACTGATTTTTGGCCTTCGGCCCTGGGATTGAAGCTTGCTTCGCCCTGGCCACGGGTTGTCTCGGTATTGCACTACATCC</Hsp_hseq>
      <Hsp_midline>|||||||||||||||||||||||||||||||||||||||||||||||||||| ||||||||||||| | |   | || || |   | ||||||||||  |||||||||     ||   ||| || | ||||||||  | ||   |||||  | | |  ||||||||| ||| |||</Hsp_midline>
    </Hsp>
    <Hsp>
      <Hsp_num>7</Hsp_num>
      <Hsp_bit-score>125.719</Hsp_bit-score>
      <Hsp_score>138</Hsp_score>
      <Hsp_evalue>8.306e-27</Hsp_evalue>
      <Hsp_query-from>1</Hsp_query-from>
      <Hsp_query-to>173</Hsp_query-to>
      <Hsp_hit-from>15541</Hsp_hit-from>
      <Hsp_hit-to>15714</Hsp_hit-to>
      <Hsp_query-frame>1</Hsp_query-frame>
      <Hsp_hit-frame>1</Hsp_hit-frame>
      <Hsp_identity>135</Hsp_identity>
      <Hsp_positive>135</Hsp_positive>
      <Hsp_gaps>3</Hsp_gaps>
      <Hsp_align-len>175</Hsp_align-len>
      <Hsp_qseq>ATCGCTTCTCGGCCTTTTGGCTAAGATCAAGTGTAGTATCTGTTCTTATCAGTTTAATATCTGATACG-TCCTCTAT-CCGAGGACAATATATTAAATGGATTTTTGGAGCAGGGAGATGGAATAGGAGCTTGCTCTGTCCACTCCACGCATCGACCTGGTATTGCAGTACCTCC</Hsp_qseq>
      <Hsp_hseq>ATCGCTTCTCGGCCTTTTGGCTAAGATCAAGTGTAGTATCTGTTCTTATCAGCTTAATATCTGATATGTTAGGCAATGCCTAACTC-ATATATTAAACTGATTTTTGGCCTTCGGCCCTGGGATTGAAGCTTGCTTCGCCCTGGCCACGGGTTGTCTCGGTATTGCACTACATCC</Hsp_hseq>
      <Hsp_midline>|||||||||||||||||||||||||||||||||||||||||||||||||||| ||||||||||||| | |   | || || |   | ||||||||||  |||||||||     ||   ||| || | ||||||||  | ||   |||||  | | |  ||||||||| ||| |||</Hsp_midline>
    </Hsp>
    <Hsp>
      <Hsp_num>8</Hsp_num>
      <Hsp_bit-score>125.719</Hsp_bit-score>
      <Hsp_score>138</Hsp_score>
      <Hsp_evalue>8.306e-27</Hsp_evalue>
      <Hsp_query-from>1</Hsp_query-from>
      <Hsp_query-to>173</Hsp_query-to>
      <Hsp_hit-from>17039</Hsp_hit-from>
      <Hsp_hit-to>17212</Hsp_hit-to>
      <Hsp_query-frame>1</Hsp_query-frame>
      <Hsp_hit-frame>1</Hsp_hit-frame>
      <Hsp_identity>135</Hsp_identity>
      <Hsp_positive>135</Hsp_positive>
      <Hsp_gaps>3</Hsp_gaps>
      <Hsp_align-len>175</Hsp_align-len>
      <Hsp_qseq>ATCGCTTCTCGGCCTTTTGGCTAAGATCAAGTGTAGTATCTGTTCTTATCAGTTTAATATCTGATACG-TCCTCTAT-CCGAGGACAATATATTAAATGGATTTTTGGAGCAGGGAGATGGAATAGGAGCTTGCTCTGTCCACTCCACGCATCGACCTGGTATTGCAGTACCTCC</Hsp_qseq>
      <Hsp_hseq>ATCGCTTCTCGGCCTTTTGGCTAAGATCAAGTGTAGTATCTGTTCTTATCAGCTTAATATCTGATATGTTAGGCAATGCCTAACTC-ATATATTAAACTGATTTTTGGCCTTCGGCCCTGGGATTGAAGCTTGCTTCGCCCTGGCCACGGGTTGTCTCGGTATTGCACTACATCC</Hsp_hseq>
      <Hsp_midline>|||||||||||||||||||||||||||||||||||||||||||||||||||| ||||||||||||| | |   | || || |   | ||||||||||  |||||||||     ||   ||| || | ||||||||  | ||   |||||  | | |  ||||||||| ||| |||</Hsp_midline>
    </Hsp>
    <Hsp>
      <Hsp_num>9</Hsp_num>
      <Hsp_bit-score>117.604</Hsp_bit-score>
      <Hsp_score>129</Hsp_score>
      <Hsp_evalue>4.30262e-24</Hsp_evalue>
      <Hsp_query-from>1</Hsp_query-from>
      <Hsp_query-to>106</Hsp_query-to>
      <Hsp_hit-from>4753</Hsp_hit-from>
      <Hsp_hit-to>4859</Hsp_hit-to>
      <Hsp_query-frame>1</Hsp_query-frame>
      <Hsp_hit-frame>1</Hsp_hit-frame>
      <Hsp_identity>93</Hsp_identity>
      <Hsp_positive>93</Hsp_positive>
      <Hsp_gaps>3</Hsp_gaps>
      <Hsp_align-len>108</Hsp_align-len>
      <Hsp_qseq>ATCGCTTCTCGGCCTTTTGGCTAAGATCAAGTGTAGTATCTGTTCTTATCAGTTTAATATCTGATACG-TCCTCTAT-CCGAGGACAATATATTAAATGGATTTTTGG</Hsp_qseq>
      <Hsp_hseq>ATCGCTTCTCGGCCTTTTGGCTAAGATCAAGTGTAGTATCTGTTCTTATCAGCTTAATATCTGATATGTTAGGCAATGCCTAACTC-ATATATTAAACTGATTTTTGG</Hsp_hseq>
      <Hsp_midline>|||||||||||||||||||||||||||||||||||||||||||||||||||| ||||||||||||| | |   | || || |   | ||||||||||  |||||||||</Hsp_midline>
    </Hsp>
    <Hsp>
      <Hsp_num>10</Hsp_num>
      <Hsp_bit-score>93.2581</Hsp_bit-score>
      <Hsp_score>102</Hsp_score>
      <Hsp_evalue>4.90928e-17</Hsp_evalue>
      <Hsp_query-from>1</Hsp_query-from>
      <Hsp_query-to>173</Hsp_query-to>
      <Hsp_hit-from>12551</Hsp_hit-from>
      <Hsp_hit-to>12720</Hsp_hit-to>
      <Hsp_query-frame>1</Hsp_query-frame>
      <Hsp_hit-frame>1</Hsp_hit-frame>
      <Hsp_identity>131</Hsp_identity>
      <Hsp_positive>131</Hsp_positive>
      <Hsp_gaps>7</Hsp_gaps>
      <Hsp_align-len>175</Hsp_align-len>
      <Hsp_qseq>ATCGCTTCTCGGCCTTTTGGCTAAGATCAAGTGTAGTATCTGTTCTTATCAGTTTAATATCTGATACG-TCCTCTAT-CCGAGGACAATATATTAAATGGATTTTTGGAGCAGGGAGATGGAATAGGAGCTTGCTCTGTCCACTCCACGCATCGACCTGGTATTGCAGTACCTCC</Hsp_qseq>
      <Hsp_hseq>ATCGCTTCTCG-CCTTTTGGCTAAGATCAAGT-TAG-ATCTGTTCTTATCAGCTTAAT-TCTGATATGTTAGGCAATGCCTAACTC-ATATATTAAACTGATTTTTGGCCTTCGGCCCTGGGATTGAAGCTTGCTTCGCCCTGGCCACGGGTTGTCTCGGTATTGCACTACATCC</Hsp_hseq>
      <Hsp_midline>||||||||||| |||||||||||||||||||| ||| ||||||||||||||| ||||| ||||||| | |   | || || |   | ||||||||||  |||||||||     ||   ||| || | ||||||||  | ||   |||||  | | |  ||||||||| ||| |||</Hsp_midline>
    </Hsp>
    <Hsp>
      <Hsp_num>11</Hsp_num>
      <Hsp_bit-score>84.2413</Hsp_bit-score>
      <Hsp_score>92</Hsp_score>
      <Hsp_evalue>2.54307e-14</Hsp_evalue>
      <Hsp_query-from>24</Hsp_query-from>
      <Hsp_query-to>173</Hsp_query-to>
      <Hsp_hit-from>9583</Hsp_hit-from>
      <Hsp_hit-to>9733</Hsp_hit-to>
      <Hsp_query-frame>1</Hsp_query-frame>
      <Hsp_hit-frame>1</Hsp_hit-frame>
      <Hsp_identity>112</Hsp_identity>
      <Hsp_positive>112</Hsp_positive>
      <Hsp_gaps>3</Hsp_gaps>
      <Hsp_align-len>152</Hsp_align-len>
      <Hsp_qseq>AGATCAAGTGTAGTATCTGTTCTTATCAGTTTAATATCTGATACG-TCCTCTAT-CCGAGGACAATATATTAAATGGATTTTTGGAGCAGGGAGATGGAATAGGAGCTTGCTCTGTCCACTCCACGCATCGACCTGGTATTGCAGTACCTCC</Hsp_qseq>
      <Hsp_hseq>AGATCAAGTGTAGTATCTGTTCTTATCAGCTTAATATCTGATATGTTAGGCAATGCCTAACTC-ATATATTAAACTGATTTTTGGCCTTCGGCCCTGGGATTGAAGCTTGCTTCGCCCTGGCCACGGGTTGTCTCGGTATTGCACTACATCC</Hsp_hseq>
      <Hsp_midline>||||||||||||||||||||||||||||| ||||||||||||| | |   | || || |   | ||||||||||  |||||||||     ||   ||| || | ||||||||  | ||   |||||  | | |  ||||||||| ||| |||</Hsp_midline>
    </Hsp>
    <Hsp>
      <Hsp_num>12</Hsp_num>
      <Hsp_bit-score>68.0109</Hsp_bit-score>
      <Hsp_score>74</Hsp_score>
      <Hsp_evalue>1.95511e-09</Hsp_evalue>
      <Hsp_query-from>1</Hsp_query-from>
      <Hsp_query-to>37</Hsp_query-to>
      <Hsp_hit-from>9242</Hsp_hit-from>
      <Hsp_hit-to>9278</Hsp_hit-to>
      <Hsp_query-frame>1</Hsp_query-frame>
      <Hsp_hit-frame>1</Hsp_hit-frame>
      <Hsp_identity>37</Hsp_identity>
      <Hsp_positive>37</Hsp_positive>
      <Hsp_gaps>0</Hsp_gaps>
      <Hsp_align-len>37</Hsp_align-len>
      <Hsp_qseq>ATCGCTTCTCGGCCTTTTGGCTAAGATCAAGTGTAGT</Hsp_qseq>
      <Hsp_hseq>ATCGCTTCTCGGCCTTTTGGCTAAGATCAAGTGTAGT</Hsp_hseq>
      <Hsp_midline>|||||||||||||||||||||||||||||||||||||</Hsp_midline>
    </Hsp>
    <Hsp>
      <Hsp_num>13</Hsp_num>
      <Hsp_bit-score>49.9773</Hsp_bit-score>
      <Hsp_score>54</Hsp_score>
      <Hsp_evalue>0.000524629</Hsp_evalue>
      <Hsp_query-from>39</Hsp_query-from>
      <Hsp_query-to>173</Hsp_query-to>
      <Hsp_hit-from>306</Hsp_hit-from>
      <Hsp_hit-to>439</Hsp_hit-to>
      <Hsp_query-frame>1</Hsp_query-frame>
      <Hsp_hit-frame>1</Hsp_hit-frame>
      <Hsp_identity>96</Hsp_identity>
      <Hsp_positive>96</Hsp_positive>
      <Hsp_gaps>5</Hsp_gaps>
      <Hsp_align-len>137</Hsp_align-len>
      <Hsp_qseq>TCTGTTCTTATCAGTTTAATATCTGATACG-TCCTCTAT-CCGAGGACAATATATTAAATGGATTTTTGGAGCAGGGAGATGGAATAGGAGCTTGCTCTGTCCACTCCACGCATCGACCTGGTATTGCAGTACCTCC</Hsp_qseq>
      <Hsp_hseq>TCTGTTCTTATCAGCTTAATATCTGATATGTTAGGCAATGCCTA--ACTCTAT-TTAAACTGATTTTTGGCCTTCGGCCCTGGGATTGAAGCTTGCTTCGCCCTGGCCACGGGTTGTCTCGGTATTGCACTACATCC</Hsp_hseq>
      <Hsp_midline>|||||||||||||| ||||||||||||| | |   | || || |  ||  ||| |||||  |||||||||     ||   ||| || | ||||||||  | ||   |||||  | | |  ||||||||| ||| |||</Hsp_midline>
    </Hsp>
  </Hit_hsps>
</Hit>
<Hit>
  <Hit_num>34</Hit_num>
  <Hit_id>gi|1601957785|ref|NW_021163982.1|</Hit_id>
  <Hit_def>Dendronephthya gigantea isolate DGI-Jeju-01 unplaced genomic scaffold, DenGig_1.0 000972F</Hit_def>
  <Hit_accession>NW_021163982</Hit_accession>
  <Hit_len>15307</Hit_len>
  <Hit_hsps>
    <Hsp>
      <Hsp_num>1</Hsp_num>
      <Hsp_bit-score>125.719</Hsp_bit-score>
      <Hsp_score>138</Hsp_score>
      <Hsp_evalue>8.306e-27</Hsp_evalue>
      <Hsp_query-from>1</Hsp_query-from>
      <Hsp_query-to>173</Hsp_query-to>
      <Hsp_hit-from>1767</Hsp_hit-from>
      <Hsp_hit-to>1940</Hsp_hit-to>
      <Hsp_query-frame>1</Hsp_query-frame>
      <Hsp_hit-frame>1</Hsp_hit-frame>
      <Hsp_identity>135</Hsp_identity>
      <Hsp_positive>135</Hsp_positive>
      <Hsp_gaps>3</Hsp_gaps>
      <Hsp_align-len>175</Hsp_align-len>
      <Hsp_qseq>ATCGCTTCTCGGCCTTTTGGCTAAGATCAAGTGTAGTATCTGTTCTTATCAGTTTAATATCTGATACG-TCCTCTAT-CCGAGGACAATATATTAAATGGATTTTTGGAGCAGGGAGATGGAATAGGAGCTTGCTCTGTCCACTCCACGCATCGACCTGGTATTGCAGTACCTCC</Hsp_qseq>
      <Hsp_hseq>ATCGCTTCTCGGCCTTTTGGCTAAGATCAAGTGTAGTATCTGTTCTTATCAGCTTAATATCTGATATGTTAGGCAATGCCTAACTC-ATATATTAAACTGATTTTTGGCCTTCGGCCCTGGGATTGAAGCTTGCTTCGCCCTGGCCACGGGTTGTCTCGGTATTGCACTACATCC</Hsp_hseq>
      <Hsp_midline>|||||||||||||||||||||||||||||||||||||||||||||||||||| ||||||||||||| | |   | || || |   | ||||||||||  |||||||||     ||   ||| || | ||||||||  | ||   |||||  | | |  ||||||||| ||| |||</Hsp_midline>
    </Hsp>
    <Hsp>
      <Hsp_num>2</Hsp_num>
      <Hsp_bit-score>125.719</Hsp_bit-score>
      <Hsp_score>138</Hsp_score>
      <Hsp_evalue>8.306e-27</Hsp_evalue>
      <Hsp_query-from>1</Hsp_query-from>
      <Hsp_query-to>173</Hsp_query-to>
      <Hsp_hit-from>6654</Hsp_hit-from>
      <Hsp_hit-to>6827</Hsp_hit-to>
      <Hsp_query-frame>1</Hsp_query-frame>
      <Hsp_hit-frame>1</Hsp_hit-frame>
      <Hsp_identity>135</Hsp_identity>
      <Hsp_positive>135</Hsp_positive>
      <Hsp_gaps>3</Hsp_gaps>
      <Hsp_align-len>175</Hsp_align-len>
      <Hsp_qseq>ATCGCTTCTCGGCCTTTTGGCTAAGATCAAGTGTAGTATCTGTTCTTATCAGTTTAATATCTGATACG-TCCTCTAT-CCGAGGACAATATATTAAATGGATTTTTGGAGCAGGGAGATGGAATAGGAGCTTGCTCTGTCCACTCCACGCATCGACCTGGTATTGCAGTACCTCC</Hsp_qseq>
      <Hsp_hseq>ATCGCTTCTCGGCCTTTTGGCTAAGATCAAGTGTAGTATCTGTTCTTATCAGCTTAATATCTGATATGTTAGGCAATGCCTAACTC-ATATATTAAACTGATTTTTGGCCTTCGGCCCTGGGATTGAAGCTTGCTTCGCCCTGGCCACGGGTTGTCTCGGTATTGCACTACATCC</Hsp_hseq>
      <Hsp_midline>|||||||||||||||||||||||||||||||||||||||||||||||||||| ||||||||||||| | |   | || || |   | ||||||||||  |||||||||     ||   ||| || | ||||||||  | ||   |||||  | | |  ||||||||| ||| |||</Hsp_midline>
    </Hsp>
    <Hsp>
      <Hsp_num>3</Hsp_num>
      <Hsp_bit-score>125.719</Hsp_bit-score>
      <Hsp_score>138</Hsp_score>
      <Hsp_evalue>8.306e-27</Hsp_evalue>
      <Hsp_query-from>1</Hsp_query-from>
      <Hsp_query-to>173</Hsp_query-to>
      <Hsp_hit-from>8151</Hsp_hit-from>
      <Hsp_hit-to>8324</Hsp_hit-to>
      <Hsp_query-frame>1</Hsp_query-frame>
      <Hsp_hit-frame>1</Hsp_hit-frame>
      <Hsp_identity>135</Hsp_identity>
      <Hsp_positive>135</Hsp_positive>
      <Hsp_gaps>3</Hsp_gaps>
      <Hsp_align-len>175</Hsp_align-len>
      <Hsp_qseq>ATCGCTTCTCGGCCTTTTGGCTAAGATCAAGTGTAGTATCTGTTCTTATCAGTTTAATATCTGATACG-TCCTCTAT-CCGAGGACAATATATTAAATGGATTTTTGGAGCAGGGAGATGGAATAGGAGCTTGCTCTGTCCACTCCACGCATCGACCTGGTATTGCAGTACCTCC</Hsp_qseq>
      <Hsp_hseq>ATCGCTTCTCGGCCTTTTGGCTAAGATCAAGTGTAGTATCTGTTCTTATCAGCTTAATATCTGATATGTTAGGCAATGCCTAACTC-ATATATTAAACTGATTTTTGGCCTTCGGCCCTGGGATTGAAGCTTGCTTCGCCCTGGCCACGGGTTGTCTCGGTATTGCACTACATCC</Hsp_hseq>
      <Hsp_midline>|||||||||||||||||||||||||||||||||||||||||||||||||||| ||||||||||||| | |   | || || |   | ||||||||||  |||||||||     ||   ||| || | ||||||||  | ||   |||||  | | |  ||||||||| ||| |||</Hsp_midline>
    </Hsp>
    <Hsp>
      <Hsp_num>4</Hsp_num>
      <Hsp_bit-score>125.719</Hsp_bit-score>
      <Hsp_score>138</Hsp_score>
      <Hsp_evalue>8.306e-27</Hsp_evalue>
      <Hsp_query-from>1</Hsp_query-from>
      <Hsp_query-to>173</Hsp_query-to>
      <Hsp_hit-from>9648</Hsp_hit-from>
      <Hsp_hit-to>9821</Hsp_hit-to>
      <Hsp_query-frame>1</Hsp_query-frame>
      <Hsp_hit-frame>1</Hsp_hit-frame>
      <Hsp_identity>135</Hsp_identity>
      <Hsp_positive>135</Hsp_positive>
      <Hsp_gaps>3</Hsp_gaps>
      <Hsp_align-len>175</Hsp_align-len>
      <Hsp_qseq>ATCGCTTCTCGGCCTTTTGGCTAAGATCAAGTGTAGTATCTGTTCTTATCAGTTTAATATCTGATACG-TCCTCTAT-CCGAGGACAATATATTAAATGGATTTTTGGAGCAGGGAGATGGAATAGGAGCTTGCTCTGTCCACTCCACGCATCGACCTGGTATTGCAGTACCTCC</Hsp_qseq>
      <Hsp_hseq>ATCGCTTCTCGGCCTTTTGGCTAAGATCAAGTGTAGTATCTGTTCTTATCAGCTTAATATCTGATATGTTAGGCAATGCCTAACTC-ATATATTAAACTGATTTTTGGCCTTCGGCCCTGGGATTGAAGCTTGCTTCGCCCTGGCCACGGGTTGTCTCGGTATTGCACTACATCC</Hsp_hseq>
      <Hsp_midline>|||||||||||||||||||||||||||||||||||||||||||||||||||| ||||||||||||| | |   | || || |   | ||||||||||  |||||||||     ||   ||| || | ||||||||  | ||   |||||  | | |  ||||||||| ||| |||</Hsp_midline>
    </Hsp>
    <Hsp>
      <Hsp_num>5</Hsp_num>
      <Hsp_bit-score>101.373</Hsp_bit-score>
      <Hsp_score>111</Hsp_score>
      <Hsp_evalue>3.30785e-19</Hsp_evalue>
      <Hsp_query-from>1</Hsp_query-from>
      <Hsp_query-to>58</Hsp_query-to>
      <Hsp_hit-from>11146</Hsp_hit-from>
      <Hsp_hit-to>11203</Hsp_hit-to>
      <Hsp_query-frame>1</Hsp_query-frame>
      <Hsp_hit-frame>1</Hsp_hit-frame>
      <Hsp_identity>57</Hsp_identity>
      <Hsp_positive>57</Hsp_positive>
      <Hsp_gaps>0</Hsp_gaps>
      <Hsp_align-len>58</Hsp_align-len>
      <Hsp_qseq>ATCGCTTCTCGGCCTTTTGGCTAAGATCAAGTGTAGTATCTGTTCTTATCAGTTTAAT</Hsp_qseq>
      <Hsp_hseq>ATCGCTTCTCGGCCTTTTGGCTAAGATCAAGTGTAGTATCTGTTCTTATCAGCTTAAT</Hsp_hseq>
      <Hsp_midline>|||||||||||||||||||||||||||||||||||||||||||||||||||| |||||</Hsp_midline>
    </Hsp>
    <Hsp>
      <Hsp_num>6</Hsp_num>
      <Hsp_bit-score>79.7328</Hsp_bit-score>
      <Hsp_score>87</Hsp_score>
      <Hsp_evalue>1.08134e-12</Hsp_evalue>
      <Hsp_query-from>22</Hsp_query-from>
      <Hsp_query-to>173</Hsp_query-to>
      <Hsp_hit-from>5177</Hsp_hit-from>
      <Hsp_hit-to>5328</Hsp_hit-to>
      <Hsp_query-frame>1</Hsp_query-frame>
      <Hsp_hit-frame>1</Hsp_hit-frame>
      <Hsp_identity>113</Hsp_identity>
      <Hsp_positive>113</Hsp_positive>
      <Hsp_gaps>4</Hsp_gaps>
      <Hsp_align-len>154</Hsp_align-len>
      <Hsp_qseq>TAAGATCAAGTGTAGTATCTGTTCTTATCAGTTTAATATCTGATACG-TCCTCTAT-CCGAGGACAATATATTAAATGGATTTTTGGAGCAGGGAGATGGAATAGGAGCTTGCTCTGTCCACTCCACGCATCGACCTGGTATTGCAGTACCTCC</Hsp_qseq>
      <Hsp_hseq>TAAGATCAAGTGTAGTATCTGTTCTT-TCAGCTTAATATCTGATATGTTAGGCAATGCCTAACTC-ATATATTAAACTGATTTTTGGCCTTCGGCCCTGGGATTGAAGCTTGCTTCGCCCTGGCCACGGGTTGTCTCGGTATTGCACTACATCC</Hsp_hseq>
      <Hsp_midline>|||||||||||||||||||||||||| |||| ||||||||||||| | |   | || || |   | ||||||||||  |||||||||     ||   ||| || | ||||||||  | ||   |||||  | | |  ||||||||| ||| |||</Hsp_midline>
    </Hsp>
    <Hsp>
      <Hsp_num>7</Hsp_num>
      <Hsp_bit-score>66.2076</Hsp_bit-score>
      <Hsp_score>72</Hsp_score>
      <Hsp_evalue>6.82401e-09</Hsp_evalue>
      <Hsp_query-from>1</Hsp_query-from>
      <Hsp_query-to>36</Hsp_query-to>
      <Hsp_hit-from>3265</Hsp_hit-from>
      <Hsp_hit-to>3300</Hsp_hit-to>
      <Hsp_query-frame>1</Hsp_query-frame>
      <Hsp_hit-frame>1</Hsp_hit-frame>
      <Hsp_identity>36</Hsp_identity>
      <Hsp_positive>36</Hsp_positive>
      <Hsp_gaps>0</Hsp_gaps>
      <Hsp_align-len>36</Hsp_align-len>
      <Hsp_qseq>ATCGCTTCTCGGCCTTTTGGCTAAGATCAAGTGTAG</Hsp_qseq>
      <Hsp_hseq>ATCGCTTCTCGGCCTTTTGGCTAAGATCAAGTGTAG</Hsp_hseq>
      <Hsp_midline>||||||||||||||||||||||||||||||||||||</Hsp_midline>
    </Hsp>
    <Hsp>
      <Hsp_num>8</Hsp_num>
      <Hsp_bit-score>57.1907</Hsp_bit-score>
      <Hsp_score>62</Hsp_score>
      <Hsp_evalue>3.53492e-06</Hsp_evalue>
      <Hsp_query-from>39</Hsp_query-from>
      <Hsp_query-to>173</Hsp_query-to>
      <Hsp_hit-from>307</Hsp_hit-from>
      <Hsp_hit-to>442</Hsp_hit-to>
      <Hsp_query-frame>1</Hsp_query-frame>
      <Hsp_hit-frame>1</Hsp_hit-frame>
      <Hsp_identity>97</Hsp_identity>
      <Hsp_positive>97</Hsp_positive>
      <Hsp_gaps>3</Hsp_gaps>
      <Hsp_align-len>137</Hsp_align-len>
      <Hsp_qseq>TCTGTTCTTATCAGTTTAATATCTGATACG-TCCTCTAT-CCGAGGACAATATATTAAATGGATTTTTGGAGCAGGGAGATGGAATAGGAGCTTGCTCTGTCCACTCCACGCATCGACCTGGTATTGCAGTACCTCC</Hsp_qseq>
      <Hsp_hseq>TCTGTTCTTATCAGCTTAATATCTGATATGTTAGGCAATGCCTAACTC-ATATATTAAACTGATTTTTGGCCTTCGGCCCTGGGATTGAAGCTTGCTTCGCCCTGGCCACGGGTTGTCTCGGTATTGCACTACATCC</Hsp_hseq>
      <Hsp_midline>|||||||||||||| ||||||||||||| | |   | || || |   | ||||||||||  |||||||||     ||   ||| || | ||||||||  | ||   |||||  | | |  ||||||||| ||| |||</Hsp_midline>
    </Hsp>
  </Hit_hsps>
</Hit>
<Hit>
  <Hit_num>35</Hit_num>
  <Hit_id>gi|156345485|ref|NW_001833172.1|</Hit_id>
  <Hit_def>Nematostella vectensis NEMVEscaffold_1318 genomic scaffold, whole genome shotgun sequence</Hit_def>
  <Hit_accession>NW_001833172</Hit_accession>
  <Hit_len>35249</Hit_len>
  <Hit_hsps>
    <Hsp>
      <Hsp_num>1</Hsp_num>
      <Hsp_bit-score>118.505</Hsp_bit-score>
      <Hsp_score>130</Hsp_score>
      <Hsp_evalue>1.23272e-24</Hsp_evalue>
      <Hsp_query-from>17</Hsp_query-from>
      <Hsp_query-to>173</Hsp_query-to>
      <Hsp_hit-from>34288</Hsp_hit-from>
      <Hsp_hit-to>34446</Hsp_hit-to>
      <Hsp_query-frame>1</Hsp_query-frame>
      <Hsp_hit-frame>1</Hsp_hit-frame>
      <Hsp_identity>123</Hsp_identity>
      <Hsp_positive>123</Hsp_positive>
      <Hsp_gaps>2</Hsp_gaps>
      <Hsp_align-len>159</Hsp_align-len>
      <Hsp_qseq>TTGGCTAAGATCAAGTGTAGTATCTGTTCTTATCAGTTTAATATCTGATACG-TCCTCTATCCGAGGACAATATATTAAATGGATTTTTGGAGCAGGGAGATGGAAT-AGGAGCTTGCTCTGTCCACTCCACGCATCGACCTGGTATTGCAGTACCTCC</Hsp_qseq>
      <Hsp_hseq>TTGGCTAAGATCAAGTGTAGTATCTGTTCTTATCAGCTTAATATCTGATACGCTGCTCATTGAGTAGCTCATATATTAAACTGATTTTTGGAAACTGGCTGTGGAATAAGCGGCTTGCTGCGTCCCAGCCACGGGTTGTCTCGGTATTGCACTACCTCC</Hsp_hseq>
      <Hsp_midline>|||||||||||||||||||||||||||||||||||| ||||||||||||||| | |||  |  |  |   ||||||||||  ||||||||||    ||   |||||| ||  |||||||  ||||   |||||  | | |  ||||||||| |||||||</Hsp_midline>
    </Hsp>
  </Hit_hsps>
</Hit>
<Hit>
  <Hit_num>36</Hit_num>
  <Hit_id>gi|443585600|ref|NW_004172188.1|</Hit_id>
  <Hit_def>Hydra vulgaris strain 105 unplaced genomic scaffold, Hydra_RP_1.0 HYDRAscaffold_34013</Hit_def>
  <Hit_accession>NW_004172188</Hit_accession>
  <Hit_len>50816</Hit_len>
  <Hit_hsps>
    <Hsp>
      <Hsp_num>1</Hsp_num>
      <Hsp_bit-score>113.997</Hsp_bit-score>
      <Hsp_score>125</Hsp_score>
      <Hsp_evalue>5.24166e-23</Hsp_evalue>
      <Hsp_query-from>1</Hsp_query-from>
      <Hsp_query-to>106</Hsp_query-to>
      <Hsp_hit-from>50232</Hsp_hit-from>
      <Hsp_hit-to>50127</Hsp_hit-to>
      <Hsp_query-frame>1</Hsp_query-frame>
      <Hsp_hit-frame>-1</Hsp_hit-frame>
      <Hsp_identity>91</Hsp_identity>
      <Hsp_positive>91</Hsp_positive>
      <Hsp_gaps>4</Hsp_gaps>
      <Hsp_align-len>108</Hsp_align-len>
      <Hsp_qseq>ATCGCTTCTCGGCCTTTTGGCTAAGATCAAGTGTAGTATCTGTTCTTATCAGTTTAATATCTGATACGTC--CTCTATCCGAGGACAATATATTAAATGGATTTTTGG</Hsp_qseq>
      <Hsp_hseq>ATCGCTTCTCGGCCTAATGGCTAAGATCAAGTGTAGTATCTGTTCTTATCAGTTTAATATCTGGTACGCCGGCACAGTCC--GGCTCATATATTAATCTGATTTTTGG</Hsp_hseq>
      <Hsp_midline>|||||||||||||||  |||||||||||||||||||||||||||||||||||||||||||||| |||| |  | |  |||  ||   |||||||||   |||||||||</Hsp_midline>
    </Hsp>
    <Hsp>
      <Hsp_num>2</Hsp_num>
      <Hsp_bit-score>113.997</Hsp_bit-score>
      <Hsp_score>125</Hsp_score>
      <Hsp_evalue>5.24166e-23</Hsp_evalue>
      <Hsp_query-from>1</Hsp_query-from>
      <Hsp_query-to>106</Hsp_query-to>
      <Hsp_hit-from>50599</Hsp_hit-from>
      <Hsp_hit-to>50494</Hsp_hit-to>
      <Hsp_query-frame>1</Hsp_query-frame>
      <Hsp_hit-frame>-1</Hsp_hit-frame>
      <Hsp_identity>91</Hsp_identity>
      <Hsp_positive>91</Hsp_positive>
      <Hsp_gaps>4</Hsp_gaps>
      <Hsp_align-len>108</Hsp_align-len>
      <Hsp_qseq>ATCGCTTCTCGGCCTTTTGGCTAAGATCAAGTGTAGTATCTGTTCTTATCAGTTTAATATCTGATACGTC--CTCTATCCGAGGACAATATATTAAATGGATTTTTGG</Hsp_qseq>
      <Hsp_hseq>ATCGCTTCTCGGCCTAATGGCTAAGATCAAGTGTAGTATCTGTTCTTATCAGTTTAATATCTGGTACGCCGGCACAGTCC--GGCTCATATATTAATCTGATTTTTGG</Hsp_hseq>
      <Hsp_midline>|||||||||||||||  |||||||||||||||||||||||||||||||||||||||||||||| |||| |  | |  |||  ||   |||||||||   |||||||||</Hsp_midline>
    </Hsp>
  </Hit_hsps>
</Hit>
<Hit>
  <Hit_num>37</Hit_num>
  <Hit_id>gi|443581496|ref|NW_004176286.1|</Hit_id>
  <Hit_def>Hydra vulgaris strain 105 unplaced genomic scaffold, Hydra_RP_1.0 HYDRAscaffold_29907</Hit_def>
  <Hit_accession>NW_004176286</Hit_accession>
  <Hit_len>21956</Hit_len>
  <Hit_hsps>
    <Hsp>
      <Hsp_num>1</Hsp_num>
      <Hsp_bit-score>113.997</Hsp_bit-score>
      <Hsp_score>125</Hsp_score>
      <Hsp_evalue>5.24166e-23</Hsp_evalue>
      <Hsp_query-from>1</Hsp_query-from>
      <Hsp_query-to>106</Hsp_query-to>
      <Hsp_hit-from>9098</Hsp_hit-from>
      <Hsp_hit-to>8993</Hsp_hit-to>
      <Hsp_query-frame>1</Hsp_query-frame>
      <Hsp_hit-frame>-1</Hsp_hit-frame>
      <Hsp_identity>91</Hsp_identity>
      <Hsp_positive>91</Hsp_positive>
      <Hsp_gaps>4</Hsp_gaps>
      <Hsp_align-len>108</Hsp_align-len>
      <Hsp_qseq>ATCGCTTCTCGGCCTTTTGGCTAAGATCAAGTGTAGTATCTGTTCTTATCAGTTTAATATCTGATACGTC--CTCTATCCGAGGACAATATATTAAATGGATTTTTGG</Hsp_qseq>
      <Hsp_hseq>ATCGCTTCTCGGCCTAATGGCTAAGATCAAGTGTAGTATCTGTTCTTATCAGTTTAATATCTGGTACGCCGGCACAGTCC--GGCTCATATATTAATCTGATTTTTGG</Hsp_hseq>
      <Hsp_midline>|||||||||||||||  |||||||||||||||||||||||||||||||||||||||||||||| |||| |  | |  |||  ||   |||||||||   |||||||||</Hsp_midline>
    </Hsp>
  </Hit_hsps>
</Hit>
<Hit>
  <Hit_num>38</Hit_num>
  <Hit_id>gi|443579856|ref|NW_004177926.1|</Hit_id>
  <Hit_def>Hydra vulgaris strain 105 unplaced genomic scaffold, Hydra_RP_1.0 HYDRAscaffold_28263</Hit_def>
  <Hit_accession>NW_004177926</Hit_accession>
  <Hit_len>15506</Hit_len>
  <Hit_hsps>
    <Hsp>
      <Hsp_num>1</Hsp_num>
      <Hsp_bit-score>113.997</Hsp_bit-score>
      <Hsp_score>125</Hsp_score>
      <Hsp_evalue>5.24166e-23</Hsp_evalue>
      <Hsp_query-from>1</Hsp_query-from>
      <Hsp_query-to>106</Hsp_query-to>
      <Hsp_hit-from>6004</Hsp_hit-from>
      <Hsp_hit-to>5899</Hsp_hit-to>
      <Hsp_query-frame>1</Hsp_query-frame>
      <Hsp_hit-frame>-1</Hsp_hit-frame>
      <Hsp_identity>91</Hsp_identity>
      <Hsp_positive>91</Hsp_positive>
      <Hsp_gaps>4</Hsp_gaps>
      <Hsp_align-len>108</Hsp_align-len>
      <Hsp_qseq>ATCGCTTCTCGGCCTTTTGGCTAAGATCAAGTGTAGTATCTGTTCTTATCAGTTTAATATCTGATACGTC--CTCTATCCGAGGACAATATATTAAATGGATTTTTGG</Hsp_qseq>
      <Hsp_hseq>ATCGCTTCTCGGCCTAATGGCTAAGATCAAGTGTAGTATCTGTTCTTATCAGTTTAATATCTGGTACGCCGGCACAGTCC--GGCTCATATATTAATCTGATTTTTGG</Hsp_hseq>
      <Hsp_midline>|||||||||||||||  |||||||||||||||||||||||||||||||||||||||||||||| |||| |  | |  |||  ||   |||||||||   |||||||||</Hsp_midline>
    </Hsp>
    <Hsp>
      <Hsp_num>2</Hsp_num>
      <Hsp_bit-score>113.997</Hsp_bit-score>
      <Hsp_score>125</Hsp_score>
      <Hsp_evalue>5.24166e-23</Hsp_evalue>
      <Hsp_query-from>1</Hsp_query-from>
      <Hsp_query-to>106</Hsp_query-to>
      <Hsp_hit-from>12110</Hsp_hit-from>
      <Hsp_hit-to>12005</Hsp_hit-to>
      <Hsp_query-frame>1</Hsp_query-frame>
      <Hsp_hit-frame>-1</Hsp_hit-frame>
      <Hsp_identity>91</Hsp_identity>
      <Hsp_positive>91</Hsp_positive>
      <Hsp_gaps>4</Hsp_gaps>
      <Hsp_align-len>108</Hsp_align-len>
      <Hsp_qseq>ATCGCTTCTCGGCCTTTTGGCTAAGATCAAGTGTAGTATCTGTTCTTATCAGTTTAATATCTGATACGTC--CTCTATCCGAGGACAATATATTAAATGGATTTTTGG</Hsp_qseq>
      <Hsp_hseq>ATCGCTTCTCGGCCTAATGGCTAAGATCAAGTGTAGTATCTGTTCTTATCAGTTTAATATCTGGTACGCCGGCACAGTCC--GGCTCATATATTAATCTGATTTTTGG</Hsp_hseq>
      <Hsp_midline>|||||||||||||||  |||||||||||||||||||||||||||||||||||||||||||||| |||| |  | |  |||  ||   |||||||||   |||||||||</Hsp_midline>
    </Hsp>
    <Hsp>
      <Hsp_num>3</Hsp_num>
      <Hsp_bit-score>113.997</Hsp_bit-score>
      <Hsp_score>125</Hsp_score>
      <Hsp_evalue>5.24166e-23</Hsp_evalue>
      <Hsp_query-from>1</Hsp_query-from>
      <Hsp_query-to>106</Hsp_query-to>
      <Hsp_hit-from>12477</Hsp_hit-from>
      <Hsp_hit-to>12372</Hsp_hit-to>
      <Hsp_query-frame>1</Hsp_query-frame>
      <Hsp_hit-frame>-1</Hsp_hit-frame>
      <Hsp_identity>91</Hsp_identity>
      <Hsp_positive>91</Hsp_positive>
      <Hsp_gaps>4</Hsp_gaps>
      <Hsp_align-len>108</Hsp_align-len>
      <Hsp_qseq>ATCGCTTCTCGGCCTTTTGGCTAAGATCAAGTGTAGTATCTGTTCTTATCAGTTTAATATCTGATACGTC--CTCTATCCGAGGACAATATATTAAATGGATTTTTGG</Hsp_qseq>
      <Hsp_hseq>ATCGCTTCTCGGCCTAATGGCTAAGATCAAGTGTAGTATCTGTTCTTATCAGTTTAATATCTGGTACGCCGGCACAGTCC--GGCTCATATATTAATCTGATTTTTGG</Hsp_hseq>
      <Hsp_midline>|||||||||||||||  |||||||||||||||||||||||||||||||||||||||||||||| |||| |  | |  |||  ||   |||||||||   |||||||||</Hsp_midline>
    </Hsp>
    <Hsp>
      <Hsp_num>4</Hsp_num>
      <Hsp_bit-score>80.6345</Hsp_bit-score>
      <Hsp_score>88</Hsp_score>
      <Hsp_evalue>3.09809e-13</Hsp_evalue>
      <Hsp_query-from>1</Hsp_query-from>
      <Hsp_query-to>49</Hsp_query-to>
      <Hsp_hit-from>1943</Hsp_hit-from>
      <Hsp_hit-to>1895</Hsp_hit-to>
      <Hsp_query-frame>1</Hsp_query-frame>
      <Hsp_hit-frame>-1</Hsp_hit-frame>
      <Hsp_identity>47</Hsp_identity>
      <Hsp_positive>47</Hsp_positive>
      <Hsp_gaps>0</Hsp_gaps>
      <Hsp_align-len>49</Hsp_align-len>
      <Hsp_qseq>ATCGCTTCTCGGCCTTTTGGCTAAGATCAAGTGTAGTATCTGTTCTTAT</Hsp_qseq>
      <Hsp_hseq>ATCGCTTCTCGGCCTAATGGCTAAGATCAAGTGTAGTATCTGTTCTTAT</Hsp_hseq>
      <Hsp_midline>|||||||||||||||  ||||||||||||||||||||||||||||||||</Hsp_midline>
    </Hsp>
    <Hsp>
      <Hsp_num>5</Hsp_num>
      <Hsp_bit-score>80.6345</Hsp_bit-score>
      <Hsp_score>88</Hsp_score>
      <Hsp_evalue>3.09809e-13</Hsp_evalue>
      <Hsp_query-from>1</Hsp_query-from>
      <Hsp_query-to>49</Hsp_query-to>
      <Hsp_hit-from>11743</Hsp_hit-from>
      <Hsp_hit-to>11695</Hsp_hit-to>
      <Hsp_query-frame>1</Hsp_query-frame>
      <Hsp_hit-frame>-1</Hsp_hit-frame>
      <Hsp_identity>47</Hsp_identity>
      <Hsp_positive>47</Hsp_positive>
      <Hsp_gaps>0</Hsp_gaps>
      <Hsp_align-len>49</Hsp_align-len>
      <Hsp_qseq>ATCGCTTCTCGGCCTTTTGGCTAAGATCAAGTGTAGTATCTGTTCTTAT</Hsp_qseq>
      <Hsp_hseq>ATCGCTTCTCGGCCTAATGGCTAAGATCAAGTGTAGTATCTGTTCTTAT</Hsp_hseq>
      <Hsp_midline>|||||||||||||||  ||||||||||||||||||||||||||||||||</Hsp_midline>
    </Hsp>
    <Hsp>
      <Hsp_num>6</Hsp_num>
      <Hsp_bit-score>77.0278</Hsp_bit-score>
      <Hsp_score>84</Hsp_score>
      <Hsp_evalue>3.77425e-12</Hsp_evalue>
      <Hsp_query-from>1</Hsp_query-from>
      <Hsp_query-to>47</Hsp_query-to>
      <Hsp_hit-from>1120</Hsp_hit-from>
      <Hsp_hit-to>1074</Hsp_hit-to>
      <Hsp_query-frame>1</Hsp_query-frame>
      <Hsp_hit-frame>-1</Hsp_hit-frame>
      <Hsp_identity>45</Hsp_identity>
      <Hsp_positive>45</Hsp_positive>
      <Hsp_gaps>0</Hsp_gaps>
      <Hsp_align-len>47</Hsp_align-len>
      <Hsp_qseq>ATCGCTTCTCGGCCTTTTGGCTAAGATCAAGTGTAGTATCTGTTCTT</Hsp_qseq>
      <Hsp_hseq>ATCGCTTCTCGGCCTAATGGCTAAGATCAAGTGTAGTATCTGTTCTT</Hsp_hseq>
      <Hsp_midline>|||||||||||||||  ||||||||||||||||||||||||||||||</Hsp_midline>
    </Hsp>
    <Hsp>
      <Hsp_num>7</Hsp_num>
      <Hsp_bit-score>77.0278</Hsp_bit-score>
      <Hsp_score>84</Hsp_score>
      <Hsp_evalue>3.77425e-12</Hsp_evalue>
      <Hsp_query-from>1</Hsp_query-from>
      <Hsp_query-to>47</Hsp_query-to>
      <Hsp_hit-from>15062</Hsp_hit-from>
      <Hsp_hit-to>15016</Hsp_hit-to>
      <Hsp_query-frame>1</Hsp_query-frame>
      <Hsp_hit-frame>-1</Hsp_hit-frame>
      <Hsp_identity>45</Hsp_identity>
      <Hsp_positive>45</Hsp_positive>
      <Hsp_gaps>0</Hsp_gaps>
      <Hsp_align-len>47</Hsp_align-len>
      <Hsp_qseq>ATCGCTTCTCGGCCTTTTGGCTAAGATCAAGTGTAGTATCTGTTCTT</Hsp_qseq>
      <Hsp_hseq>ATCGCTTCTCGGCCTAATGGCTAAGATCAAGTGTAGTATCTGTTCTT</Hsp_hseq>
      <Hsp_midline>|||||||||||||||  ||||||||||||||||||||||||||||||</Hsp_midline>
    </Hsp>
    <Hsp>
      <Hsp_num>8</Hsp_num>
      <Hsp_bit-score>75.2244</Hsp_bit-score>
      <Hsp_score>82</Hsp_score>
      <Hsp_evalue>1.31734e-11</Hsp_evalue>
      <Hsp_query-from>1</Hsp_query-from>
      <Hsp_query-to>46</Hsp_query-to>
      <Hsp_hit-from>1181</Hsp_hit-from>
      <Hsp_hit-to>1136</Hsp_hit-to>
      <Hsp_query-frame>1</Hsp_query-frame>
      <Hsp_hit-frame>-1</Hsp_hit-frame>
      <Hsp_identity>44</Hsp_identity>
      <Hsp_positive>44</Hsp_positive>
      <Hsp_gaps>0</Hsp_gaps>
      <Hsp_align-len>46</Hsp_align-len>
      <Hsp_qseq>ATCGCTTCTCGGCCTTTTGGCTAAGATCAAGTGTAGTATCTGTTCT</Hsp_qseq>
      <Hsp_hseq>ATCGCTTCTCGGCCTAATGGCTAAGATCAAGTGTAGTATCTGTTCT</Hsp_hseq>
      <Hsp_midline>|||||||||||||||  |||||||||||||||||||||||||||||</Hsp_midline>
    </Hsp>
    <Hsp>
      <Hsp_num>9</Hsp_num>
      <Hsp_bit-score>61.6992</Hsp_bit-score>
      <Hsp_score>67</Hsp_score>
      <Hsp_evalue>2.90164e-07</Hsp_evalue>
      <Hsp_query-from>35</Hsp_query-from>
      <Hsp_query-to>106</Hsp_query-to>
      <Hsp_hit-from>1514</Hsp_hit-from>
      <Hsp_hit-to>1443</Hsp_hit-to>
      <Hsp_query-frame>1</Hsp_query-frame>
      <Hsp_hit-frame>-1</Hsp_hit-frame>
      <Hsp_identity>59</Hsp_identity>
      <Hsp_positive>59</Hsp_positive>
      <Hsp_gaps>4</Hsp_gaps>
      <Hsp_align-len>74</Hsp_align-len>
      <Hsp_qseq>AGTATCTGTTCTTATCAGTTTAATATCTGATACGTC--CTCTATCCGAGGACAATATATTAAATGGATTTTTGG</Hsp_qseq>
      <Hsp_hseq>AGTATCTGTTCTTATCAGTTTAATATCTGGTACGCCGGCACAGTCC--GGCTCATATATTAATCTGATTTTTGG</Hsp_hseq>
      <Hsp_midline>||||||||||||||||||||||||||||| |||| |  | |  |||  ||   |||||||||   |||||||||</Hsp_midline>
    </Hsp>
    <Hsp>
      <Hsp_num>10</Hsp_num>
      <Hsp_bit-score>61.6992</Hsp_bit-score>
      <Hsp_score>67</Hsp_score>
      <Hsp_evalue>2.90164e-07</Hsp_evalue>
      <Hsp_query-from>35</Hsp_query-from>
      <Hsp_query-to>106</Hsp_query-to>
      <Hsp_hit-from>6337</Hsp_hit-from>
      <Hsp_hit-to>6266</Hsp_hit-to>
      <Hsp_query-frame>1</Hsp_query-frame>
      <Hsp_hit-frame>-1</Hsp_hit-frame>
      <Hsp_identity>59</Hsp_identity>
      <Hsp_positive>59</Hsp_positive>
      <Hsp_gaps>4</Hsp_gaps>
      <Hsp_align-len>74</Hsp_align-len>
      <Hsp_qseq>AGTATCTGTTCTTATCAGTTTAATATCTGATACGTC--CTCTATCCGAGGACAATATATTAAATGGATTTTTGG</Hsp_qseq>
      <Hsp_hseq>AGTATCTGTTCTTATCAGTTTAATATCTGGTACGCCGGCACAGTCC--GGCTCATATATTAATCTGATTTTTGG</Hsp_hseq>
      <Hsp_midline>||||||||||||||||||||||||||||| |||| |  | |  |||  ||   |||||||||   |||||||||</Hsp_midline>
    </Hsp>
    <Hsp>
      <Hsp_num>11</Hsp_num>
      <Hsp_bit-score>61.6992</Hsp_bit-score>
      <Hsp_score>67</Hsp_score>
      <Hsp_evalue>2.90164e-07</Hsp_evalue>
      <Hsp_query-from>35</Hsp_query-from>
      <Hsp_query-to>106</Hsp_query-to>
      <Hsp_hit-from>15395</Hsp_hit-from>
      <Hsp_hit-to>15324</Hsp_hit-to>
      <Hsp_query-frame>1</Hsp_query-frame>
      <Hsp_hit-frame>-1</Hsp_hit-frame>
      <Hsp_identity>59</Hsp_identity>
      <Hsp_positive>59</Hsp_positive>
      <Hsp_gaps>4</Hsp_gaps>
      <Hsp_align-len>74</Hsp_align-len>
      <Hsp_qseq>AGTATCTGTTCTTATCAGTTTAATATCTGATACGTC--CTCTATCCGAGGACAATATATTAAATGGATTTTTGG</Hsp_qseq>
      <Hsp_hseq>AGTATCTGTTCTTATCAGTTTAATATCTGGTACGCCGGCACAGTCC--GGCTCATATATTAATCTGATTTTTGG</Hsp_hseq>
      <Hsp_midline>||||||||||||||||||||||||||||| |||| |  | |  |||  ||   |||||||||   |||||||||</Hsp_midline>
    </Hsp>
    <Hsp>
      <Hsp_num>12</Hsp_num>
      <Hsp_bit-score>39.157</Hsp_bit-score>
      <Hsp_score>42</Hsp_score>
      <Hsp_evalue>0.948552</Hsp_evalue>
      <Hsp_query-from>21</Hsp_query-from>
      <Hsp_query-to>46</Hsp_query-to>
      <Hsp_hit-from>1137</Hsp_hit-from>
      <Hsp_hit-to>1112</Hsp_hit-to>
      <Hsp_query-frame>1</Hsp_query-frame>
      <Hsp_hit-frame>-1</Hsp_hit-frame>
      <Hsp_identity>24</Hsp_identity>
      <Hsp_positive>24</Hsp_positive>
      <Hsp_gaps>0</Hsp_gaps>
      <Hsp_align-len>26</Hsp_align-len>
      <Hsp_qseq>CTAAGATCAAGTGTAGTATCTGTTCT</Hsp_qseq>
      <Hsp_hseq>CTAAGATCAAGTGTAGTATCGCTTCT</Hsp_hseq>
      <Hsp_midline>||||||||||||||||||||  ||||</Hsp_midline>
    </Hsp>
  </Hit_hsps>
</Hit>
<Hit>
  <Hit_num>39</Hit_num>
  <Hit_id>gi|443578866|ref|NW_004178899.1|</Hit_id>
  <Hit_def>Hydra vulgaris strain 105 unplaced genomic scaffold, Hydra_RP_1.0 HYDRAscaffold_27290</Hit_def>
  <Hit_accession>NW_004178899</Hit_accession>
  <Hit_len>12242</Hit_len>
  <Hit_hsps>
    <Hsp>
      <Hsp_num>1</Hsp_num>
      <Hsp_bit-score>113.997</Hsp_bit-score>
      <Hsp_score>125</Hsp_score>
      <Hsp_evalue>5.24166e-23</Hsp_evalue>
      <Hsp_query-from>1</Hsp_query-from>
      <Hsp_query-to>106</Hsp_query-to>
      <Hsp_hit-from>3652</Hsp_hit-from>
      <Hsp_hit-to>3547</Hsp_hit-to>
      <Hsp_query-frame>1</Hsp_query-frame>
      <Hsp_hit-frame>-1</Hsp_hit-frame>
      <Hsp_identity>91</Hsp_identity>
      <Hsp_positive>91</Hsp_positive>
      <Hsp_gaps>4</Hsp_gaps>
      <Hsp_align-len>108</Hsp_align-len>
      <Hsp_qseq>ATCGCTTCTCGGCCTTTTGGCTAAGATCAAGTGTAGTATCTGTTCTTATCAGTTTAATATCTGATACGTC--CTCTATCCGAGGACAATATATTAAATGGATTTTTGG</Hsp_qseq>
      <Hsp_hseq>ATCGCTTCTCGGCCTAATGGCTAAGATCAAGTGTAGTATCTGTTCTTATCAGTTTAATATCTGGTACGCCGGCACAGTCC--GGCTCATATATTAATCTGATTTTTGG</Hsp_hseq>
      <Hsp_midline>|||||||||||||||  |||||||||||||||||||||||||||||||||||||||||||||| |||| |  | |  |||  ||   |||||||||   |||||||||</Hsp_midline>
    </Hsp>
    <Hsp>
      <Hsp_num>2</Hsp_num>
      <Hsp_bit-score>80.6345</Hsp_bit-score>
      <Hsp_score>88</Hsp_score>
      <Hsp_evalue>3.09809e-13</Hsp_evalue>
      <Hsp_query-from>1</Hsp_query-from>
      <Hsp_query-to>49</Hsp_query-to>
      <Hsp_hit-from>7120</Hsp_hit-from>
      <Hsp_hit-to>7072</Hsp_hit-to>
      <Hsp_query-frame>1</Hsp_query-frame>
      <Hsp_hit-frame>-1</Hsp_hit-frame>
      <Hsp_identity>47</Hsp_identity>
      <Hsp_positive>47</Hsp_positive>
      <Hsp_gaps>0</Hsp_gaps>
      <Hsp_align-len>49</Hsp_align-len>
      <Hsp_qseq>ATCGCTTCTCGGCCTTTTGGCTAAGATCAAGTGTAGTATCTGTTCTTAT</Hsp_qseq>
      <Hsp_hseq>ATCGCTTCTCGGCCTAATGGCTAAGATCAAGTGTAGTATCTGTTCTTAT</Hsp_hseq>
      <Hsp_midline>|||||||||||||||  ||||||||||||||||||||||||||||||||</Hsp_midline>
    </Hsp>
    <Hsp>
      <Hsp_num>3</Hsp_num>
      <Hsp_bit-score>77.0278</Hsp_bit-score>
      <Hsp_score>84</Hsp_score>
      <Hsp_evalue>3.77425e-12</Hsp_evalue>
      <Hsp_query-from>1</Hsp_query-from>
      <Hsp_query-to>47</Hsp_query-to>
      <Hsp_hit-from>6356</Hsp_hit-from>
      <Hsp_hit-to>6310</Hsp_hit-to>
      <Hsp_query-frame>1</Hsp_query-frame>
      <Hsp_hit-frame>-1</Hsp_hit-frame>
      <Hsp_identity>45</Hsp_identity>
      <Hsp_positive>45</Hsp_positive>
      <Hsp_gaps>0</Hsp_gaps>
      <Hsp_align-len>47</Hsp_align-len>
      <Hsp_qseq>ATCGCTTCTCGGCCTTTTGGCTAAGATCAAGTGTAGTATCTGTTCTT</Hsp_qseq>
      <Hsp_hseq>ATCGCTTCTCGGCCTAATGGCTAAGATCAAGTGTAGTATCTGTTCTT</Hsp_hseq>
      <Hsp_midline>|||||||||||||||  ||||||||||||||||||||||||||||||</Hsp_midline>
    </Hsp>
    <Hsp>
      <Hsp_num>4</Hsp_num>
      <Hsp_bit-score>77.0278</Hsp_bit-score>
      <Hsp_score>84</Hsp_score>
      <Hsp_evalue>3.77425e-12</Hsp_evalue>
      <Hsp_query-from>1</Hsp_query-from>
      <Hsp_query-to>47</Hsp_query-to>
      <Hsp_hit-from>11305</Hsp_hit-from>
      <Hsp_hit-to>11259</Hsp_hit-to>
      <Hsp_query-frame>1</Hsp_query-frame>
      <Hsp_hit-frame>-1</Hsp_hit-frame>
      <Hsp_identity>45</Hsp_identity>
      <Hsp_positive>45</Hsp_positive>
      <Hsp_gaps>0</Hsp_gaps>
      <Hsp_align-len>47</Hsp_align-len>
      <Hsp_qseq>ATCGCTTCTCGGCCTTTTGGCTAAGATCAAGTGTAGTATCTGTTCTT</Hsp_qseq>
      <Hsp_hseq>ATCGCTTCTCGGCCTAATGGCTAAGATCAAGTGTAGTATCTGTTCTT</Hsp_hseq>
      <Hsp_midline>|||||||||||||||  ||||||||||||||||||||||||||||||</Hsp_midline>
    </Hsp>
    <Hsp>
      <Hsp_num>5</Hsp_num>
      <Hsp_bit-score>67.1093</Hsp_bit-score>
      <Hsp_score>73</Hsp_score>
      <Hsp_evalue>6.82401e-09</Hsp_evalue>
      <Hsp_query-from>32</Hsp_query-from>
      <Hsp_query-to>106</Hsp_query-to>
      <Hsp_hit-from>3988</Hsp_hit-from>
      <Hsp_hit-to>3914</Hsp_hit-to>
      <Hsp_query-frame>1</Hsp_query-frame>
      <Hsp_hit-frame>-1</Hsp_hit-frame>
      <Hsp_identity>62</Hsp_identity>
      <Hsp_positive>62</Hsp_positive>
      <Hsp_gaps>4</Hsp_gaps>
      <Hsp_align-len>77</Hsp_align-len>
      <Hsp_qseq>TGTAGTATCTGTTCTTATCAGTTTAATATCTGATACGTC--CTCTATCCGAGGACAATATATTAAATGGATTTTTGG</Hsp_qseq>
      <Hsp_hseq>TGTAGTATCTGTTCTTATCAGTTTAATATCTGGTACGCCGGCACAGTCC--GGCTCATATATTAATCTGATTTTTGG</Hsp_hseq>
      <Hsp_midline>|||||||||||||||||||||||||||||||| |||| |  | |  |||  ||   |||||||||   |||||||||</Hsp_midline>
    </Hsp>
    <Hsp>
      <Hsp_num>6</Hsp_num>
      <Hsp_bit-score>61.6992</Hsp_bit-score>
      <Hsp_score>67</Hsp_score>
      <Hsp_evalue>2.90164e-07</Hsp_evalue>
      <Hsp_query-from>35</Hsp_query-from>
      <Hsp_query-to>106</Hsp_query-to>
      <Hsp_hit-from>6689</Hsp_hit-from>
      <Hsp_hit-to>6618</Hsp_hit-to>
      <Hsp_query-frame>1</Hsp_query-frame>
      <Hsp_hit-frame>-1</Hsp_hit-frame>
      <Hsp_identity>59</Hsp_identity>
      <Hsp_positive>59</Hsp_positive>
      <Hsp_gaps>4</Hsp_gaps>
      <Hsp_align-len>74</Hsp_align-len>
      <Hsp_qseq>AGTATCTGTTCTTATCAGTTTAATATCTGATACGTC--CTCTATCCGAGGACAATATATTAAATGGATTTTTGG</Hsp_qseq>
      <Hsp_hseq>AGTATCTGTTCTTATCAGTTTAATATCTGGTACGCCGGCACAGTCC--GGCTCATATATTAATCTGATTTTTGG</Hsp_hseq>
      <Hsp_midline>||||||||||||||||||||||||||||| |||| |  | |  |||  ||   |||||||||   |||||||||</Hsp_midline>
    </Hsp>
    <Hsp>
      <Hsp_num>7</Hsp_num>
      <Hsp_bit-score>61.6992</Hsp_bit-score>
      <Hsp_score>67</Hsp_score>
      <Hsp_evalue>2.90164e-07</Hsp_evalue>
      <Hsp_query-from>35</Hsp_query-from>
      <Hsp_query-to>106</Hsp_query-to>
      <Hsp_hit-from>7453</Hsp_hit-from>
      <Hsp_hit-to>7382</Hsp_hit-to>
      <Hsp_query-frame>1</Hsp_query-frame>
      <Hsp_hit-frame>-1</Hsp_hit-frame>
      <Hsp_identity>59</Hsp_identity>
      <Hsp_positive>59</Hsp_positive>
      <Hsp_gaps>4</Hsp_gaps>
      <Hsp_align-len>74</Hsp_align-len>
      <Hsp_qseq>AGTATCTGTTCTTATCAGTTTAATATCTGATACGTC--CTCTATCCGAGGACAATATATTAAATGGATTTTTGG</Hsp_qseq>
      <Hsp_hseq>AGTATCTGTTCTTATCAGTTTAATATCTGGTACGCCGGCACAGTCC--GGCTCATATATTAATCTGATTTTTGG</Hsp_hseq>
      <Hsp_midline>||||||||||||||||||||||||||||| |||| |  | |  |||  ||   |||||||||   |||||||||</Hsp_midline>
    </Hsp>
    <Hsp>
      <Hsp_num>8</Hsp_num>
      <Hsp_bit-score>61.6992</Hsp_bit-score>
      <Hsp_score>67</Hsp_score>
      <Hsp_evalue>2.90164e-07</Hsp_evalue>
      <Hsp_query-from>35</Hsp_query-from>
      <Hsp_query-to>106</Hsp_query-to>
      <Hsp_hit-from>11638</Hsp_hit-from>
      <Hsp_hit-to>11567</Hsp_hit-to>
      <Hsp_query-frame>1</Hsp_query-frame>
      <Hsp_hit-frame>-1</Hsp_hit-frame>
      <Hsp_identity>59</Hsp_identity>
      <Hsp_positive>59</Hsp_positive>
      <Hsp_gaps>4</Hsp_gaps>
      <Hsp_align-len>74</Hsp_align-len>
      <Hsp_qseq>AGTATCTGTTCTTATCAGTTTAATATCTGATACGTC--CTCTATCCGAGGACAATATATTAAATGGATTTTTGG</Hsp_qseq>
      <Hsp_hseq>AGTATCTGTTCTTATCAGTTTAATATCTGGTACGCCGGCACAGTCC--GGCTCATATATTAATCTGATTTTTGG</Hsp_hseq>
      <Hsp_midline>||||||||||||||||||||||||||||| |||| |  | |  |||  ||   |||||||||   |||||||||</Hsp_midline>
    </Hsp>
    <Hsp>
      <Hsp_num>9</Hsp_num>
      <Hsp_bit-score>43.6655</Hsp_bit-score>
      <Hsp_score>47</Hsp_score>
      <Hsp_evalue>0.0778619</Hsp_evalue>
      <Hsp_query-from>1</Hsp_query-from>
      <Hsp_query-to>31</Hsp_query-to>
      <Hsp_hit-from>3285</Hsp_hit-from>
      <Hsp_hit-to>3255</Hsp_hit-to>
      <Hsp_query-frame>1</Hsp_query-frame>
      <Hsp_hit-frame>-1</Hsp_hit-frame>
      <Hsp_identity>28</Hsp_identity>
      <Hsp_positive>28</Hsp_positive>
      <Hsp_gaps>0</Hsp_gaps>
      <Hsp_align-len>31</Hsp_align-len>
      <Hsp_qseq>ATCGCTTCTCGGCCTTTTGGCTAAGATCAAG</Hsp_qseq>
      <Hsp_hseq>ATTGCTTCTCGGCCTAATGGCTAAGATCAAG</Hsp_hseq>
      <Hsp_midline>|| ||||||||||||  ||||||||||||||</Hsp_midline>
    </Hsp>
  </Hit_hsps>
</Hit>
<Hit>
  <Hit_num>40</Hit_num>
  <Hit_id>gi|443578220|ref|NW_004179462.1|</Hit_id>
  <Hit_def>Hydra vulgaris strain 105 unplaced genomic scaffold, Hydra_RP_1.0 HYDRAscaffold_26726</Hit_def>
  <Hit_accession>NW_004179462</Hit_accession>
  <Hit_len>10764</Hit_len>
  <Hit_hsps>
    <Hsp>
      <Hsp_num>1</Hsp_num>
      <Hsp_bit-score>113.997</Hsp_bit-score>
      <Hsp_score>125</Hsp_score>
      <Hsp_evalue>5.24166e-23</Hsp_evalue>
      <Hsp_query-from>1</Hsp_query-from>
      <Hsp_query-to>106</Hsp_query-to>
      <Hsp_hit-from>1115</Hsp_hit-from>
      <Hsp_hit-to>1010</Hsp_hit-to>
      <Hsp_query-frame>1</Hsp_query-frame>
      <Hsp_hit-frame>-1</Hsp_hit-frame>
      <Hsp_identity>91</Hsp_identity>
      <Hsp_positive>91</Hsp_positive>
      <Hsp_gaps>4</Hsp_gaps>
      <Hsp_align-len>108</Hsp_align-len>
      <Hsp_qseq>ATCGCTTCTCGGCCTTTTGGCTAAGATCAAGTGTAGTATCTGTTCTTATCAGTTTAATATCTGATACGTC--CTCTATCCGAGGACAATATATTAAATGGATTTTTGG</Hsp_qseq>
      <Hsp_hseq>ATCGCTTCTCGGCCTAATGGCTAAGATCAAGTGTAGTATCTGTTCTTATCAGTTTAATATCTGGTACGCCGGCACAGTCC--GGCTCATATATTAATCTGATTTTTGG</Hsp_hseq>
      <Hsp_midline>|||||||||||||||  |||||||||||||||||||||||||||||||||||||||||||||| |||| |  | |  |||  ||   |||||||||   |||||||||</Hsp_midline>
    </Hsp>
    <Hsp>
      <Hsp_num>2</Hsp_num>
      <Hsp_bit-score>113.997</Hsp_bit-score>
      <Hsp_score>125</Hsp_score>
      <Hsp_evalue>5.24166e-23</Hsp_evalue>
      <Hsp_query-from>1</Hsp_query-from>
      <Hsp_query-to>106</Hsp_query-to>
      <Hsp_hit-from>10611</Hsp_hit-from>
      <Hsp_hit-to>10506</Hsp_hit-to>
      <Hsp_query-frame>1</Hsp_query-frame>
      <Hsp_hit-frame>-1</Hsp_hit-frame>
      <Hsp_identity>91</Hsp_identity>
      <Hsp_positive>91</Hsp_positive>
      <Hsp_gaps>4</Hsp_gaps>
      <Hsp_align-len>108</Hsp_align-len>
      <Hsp_qseq>ATCGCTTCTCGGCCTTTTGGCTAAGATCAAGTGTAGTATCTGTTCTTATCAGTTTAATATCTGATACGTC--CTCTATCCGAGGACAATATATTAAATGGATTTTTGG</Hsp_qseq>
      <Hsp_hseq>ATCGCTTCTCGGCCTAATGGCTAAGATCAAGTGTAGTATCTGTTCTTATCAGTTTAATATCTGGTACGCCGGCACAGTCC--GGCTCATATATTAATCTGATTTTTGG</Hsp_hseq>
      <Hsp_midline>|||||||||||||||  |||||||||||||||||||||||||||||||||||||||||||||| |||| |  | |  |||  ||   |||||||||   |||||||||</Hsp_midline>
    </Hsp>
    <Hsp>
      <Hsp_num>3</Hsp_num>
      <Hsp_bit-score>80.6345</Hsp_bit-score>
      <Hsp_score>88</Hsp_score>
      <Hsp_evalue>3.09809e-13</Hsp_evalue>
      <Hsp_query-from>1</Hsp_query-from>
      <Hsp_query-to>49</Hsp_query-to>
      <Hsp_hit-from>1867</Hsp_hit-from>
      <Hsp_hit-to>1819</Hsp_hit-to>
      <Hsp_query-frame>1</Hsp_query-frame>
      <Hsp_hit-frame>-1</Hsp_hit-frame>
      <Hsp_identity>47</Hsp_identity>
      <Hsp_positive>47</Hsp_positive>
      <Hsp_gaps>0</Hsp_gaps>
      <Hsp_align-len>49</Hsp_align-len>
      <Hsp_qseq>ATCGCTTCTCGGCCTTTTGGCTAAGATCAAGTGTAGTATCTGTTCTTAT</Hsp_qseq>
      <Hsp_hseq>ATCGCTTCTCGGCCTAATGGCTAAGATCAAGTGTAGTATCTGTTCTTAT</Hsp_hseq>
      <Hsp_midline>|||||||||||||||  ||||||||||||||||||||||||||||||||</Hsp_midline>
    </Hsp>
    <Hsp>
      <Hsp_num>4</Hsp_num>
      <Hsp_bit-score>77.0278</Hsp_bit-score>
      <Hsp_score>84</Hsp_score>
      <Hsp_evalue>3.77425e-12</Hsp_evalue>
      <Hsp_query-from>1</Hsp_query-from>
      <Hsp_query-to>47</Hsp_query-to>
      <Hsp_hit-from>748</Hsp_hit-from>
      <Hsp_hit-to>702</Hsp_hit-to>
      <Hsp_query-frame>1</Hsp_query-frame>
      <Hsp_hit-frame>-1</Hsp_hit-frame>
      <Hsp_identity>45</Hsp_identity>
      <Hsp_positive>45</Hsp_positive>
      <Hsp_gaps>0</Hsp_gaps>
      <Hsp_align-len>47</Hsp_align-len>
      <Hsp_qseq>ATCGCTTCTCGGCCTTTTGGCTAAGATCAAGTGTAGTATCTGTTCTT</Hsp_qseq>
      <Hsp_hseq>ATCGCTTCTCGGCCTAATGGCTAAGATCAAGTGTAGTATCTGTTCTT</Hsp_hseq>
      <Hsp_midline>|||||||||||||||  ||||||||||||||||||||||||||||||</Hsp_midline>
    </Hsp>
    <Hsp>
      <Hsp_num>5</Hsp_num>
      <Hsp_bit-score>77.0278</Hsp_bit-score>
      <Hsp_score>84</Hsp_score>
      <Hsp_evalue>3.77425e-12</Hsp_evalue>
      <Hsp_query-from>1</Hsp_query-from>
      <Hsp_query-to>47</Hsp_query-to>
      <Hsp_hit-from>10244</Hsp_hit-from>
      <Hsp_hit-to>10198</Hsp_hit-to>
      <Hsp_query-frame>1</Hsp_query-frame>
      <Hsp_hit-frame>-1</Hsp_hit-frame>
      <Hsp_identity>45</Hsp_identity>
      <Hsp_positive>45</Hsp_positive>
      <Hsp_gaps>0</Hsp_gaps>
      <Hsp_align-len>47</Hsp_align-len>
      <Hsp_qseq>ATCGCTTCTCGGCCTTTTGGCTAAGATCAAGTGTAGTATCTGTTCTT</Hsp_qseq>
      <Hsp_hseq>ATCGCTTCTCGGCCTAATGGCTAAGATCAAGTGTAGTATCTGTTCTT</Hsp_hseq>
      <Hsp_midline>|||||||||||||||  ||||||||||||||||||||||||||||||</Hsp_midline>
    </Hsp>
    <Hsp>
      <Hsp_num>6</Hsp_num>
      <Hsp_bit-score>61.6992</Hsp_bit-score>
      <Hsp_score>67</Hsp_score>
      <Hsp_evalue>2.90164e-07</Hsp_evalue>
      <Hsp_query-from>35</Hsp_query-from>
      <Hsp_query-to>106</Hsp_query-to>
      <Hsp_hit-from>1448</Hsp_hit-from>
      <Hsp_hit-to>1377</Hsp_hit-to>
      <Hsp_query-frame>1</Hsp_query-frame>
      <Hsp_hit-frame>-1</Hsp_hit-frame>
      <Hsp_identity>59</Hsp_identity>
      <Hsp_positive>59</Hsp_positive>
      <Hsp_gaps>4</Hsp_gaps>
      <Hsp_align-len>74</Hsp_align-len>
      <Hsp_qseq>AGTATCTGTTCTTATCAGTTTAATATCTGATACGTC--CTCTATCCGAGGACAATATATTAAATGGATTTTTGG</Hsp_qseq>
      <Hsp_hseq>AGTATCTGTTCTTATCAGTTTAATATCTGGTACGCCGGCACAGTCC--GGCTCATATATTAATCTGATTTTTGG</Hsp_hseq>
      <Hsp_midline>||||||||||||||||||||||||||||| |||| |  | |  |||  ||   |||||||||   |||||||||</Hsp_midline>
    </Hsp>
  </Hit_hsps>
</Hit>
<Hit>
  <Hit_num>41</Hit_num>
  <Hit_id>gi|443577585|ref|NW_004180097.1|</Hit_id>
  <Hit_def>Hydra vulgaris strain 105 unplaced genomic scaffold, Hydra_RP_1.0 HYDRAscaffold_26086</Hit_def>
  <Hit_accession>NW_004180097</Hit_accession>
  <Hit_len>9410</Hit_len>
  <Hit_hsps>
    <Hsp>
      <Hsp_num>1</Hsp_num>
      <Hsp_bit-score>113.997</Hsp_bit-score>
      <Hsp_score>125</Hsp_score>
      <Hsp_evalue>5.24166e-23</Hsp_evalue>
      <Hsp_query-from>1</Hsp_query-from>
      <Hsp_query-to>106</Hsp_query-to>
      <Hsp_hit-from>154</Hsp_hit-from>
      <Hsp_hit-to>259</Hsp_hit-to>
      <Hsp_query-frame>1</Hsp_query-frame>
      <Hsp_hit-frame>1</Hsp_hit-frame>
      <Hsp_identity>91</Hsp_identity>
      <Hsp_positive>91</Hsp_positive>
      <Hsp_gaps>4</Hsp_gaps>
      <Hsp_align-len>108</Hsp_align-len>
      <Hsp_qseq>ATCGCTTCTCGGCCTTTTGGCTAAGATCAAGTGTAGTATCTGTTCTTATCAGTTTAATATCTGATACGTC--CTCTATCCGAGGACAATATATTAAATGGATTTTTGG</Hsp_qseq>
      <Hsp_hseq>ATCGCTTCTCGGCCTAATGGCTAAGATCAAGTGTAGTATCTGTTCTTATCAGTTTAATATCTGGTACGCCGGCACAGTCC--GGCTCATATATTAATCTGATTTTTGG</Hsp_hseq>
      <Hsp_midline>|||||||||||||||  |||||||||||||||||||||||||||||||||||||||||||||| |||| |  | |  |||  ||   |||||||||   |||||||||</Hsp_midline>
    </Hsp>
    <Hsp>
      <Hsp_num>2</Hsp_num>
      <Hsp_bit-score>109.488</Hsp_bit-score>
      <Hsp_score>120</Hsp_score>
      <Hsp_evalue>6.38565e-22</Hsp_evalue>
      <Hsp_query-from>1</Hsp_query-from>
      <Hsp_query-to>106</Hsp_query-to>
      <Hsp_hit-from>8641</Hsp_hit-from>
      <Hsp_hit-to>8746</Hsp_hit-to>
      <Hsp_query-frame>1</Hsp_query-frame>
      <Hsp_hit-frame>1</Hsp_hit-frame>
      <Hsp_identity>90</Hsp_identity>
      <Hsp_positive>90</Hsp_positive>
      <Hsp_gaps>4</Hsp_gaps>
      <Hsp_align-len>108</Hsp_align-len>
      <Hsp_qseq>ATCGCTTCTCGGCCTTTTGGCTAAGATCAAGTGTAGTATCTGTTCTTATCAGTTTAATATCTGATACGTC--CTCTATCCGAGGACAATATATTAAATGGATTTTTGG</Hsp_qseq>
      <Hsp_hseq>ATCGCTTTTCGGCCTAATGGCTAAGATCAAGTGTAGTATCTGTTCTTATCAGTTTAATATTTGGTACGCCGGCCCAGTCC--GGCTCATATATTAATTTGATTTTTGG</Hsp_hseq>
      <Hsp_midline>||||||| |||||||  ||||||||||||||||||||||||||||||||||||||||||| || |||| |  | |  |||  ||   ||||||||| | |||||||||</Hsp_midline>
    </Hsp>
    <Hsp>
      <Hsp_num>3</Hsp_num>
      <Hsp_bit-score>84.2413</Hsp_bit-score>
      <Hsp_score>92</Hsp_score>
      <Hsp_evalue>2.54307e-14</Hsp_evalue>
      <Hsp_query-from>1</Hsp_query-from>
      <Hsp_query-to>51</Hsp_query-to>
      <Hsp_hit-from>521</Hsp_hit-from>
      <Hsp_hit-to>571</Hsp_hit-to>
      <Hsp_query-frame>1</Hsp_query-frame>
      <Hsp_hit-frame>1</Hsp_hit-frame>
      <Hsp_identity>49</Hsp_identity>
      <Hsp_positive>49</Hsp_positive>
      <Hsp_gaps>0</Hsp_gaps>
      <Hsp_align-len>51</Hsp_align-len>
      <Hsp_qseq>ATCGCTTCTCGGCCTTTTGGCTAAGATCAAGTGTAGTATCTGTTCTTATCA</Hsp_qseq>
      <Hsp_hseq>ATCGCTTCTCGGCCTAATGGCTAAGATCAAGTGTAGTATCTGTTCTTATCA</Hsp_hseq>
      <Hsp_midline>|||||||||||||||  ||||||||||||||||||||||||||||||||||</Hsp_midline>
    </Hsp>
    <Hsp>
      <Hsp_num>4</Hsp_num>
      <Hsp_bit-score>68.0109</Hsp_bit-score>
      <Hsp_score>74</Hsp_score>
      <Hsp_evalue>1.95511e-09</Hsp_evalue>
      <Hsp_query-from>1</Hsp_query-from>
      <Hsp_query-to>47</Hsp_query-to>
      <Hsp_hit-from>9008</Hsp_hit-from>
      <Hsp_hit-to>9054</Hsp_hit-to>
      <Hsp_query-frame>1</Hsp_query-frame>
      <Hsp_hit-frame>1</Hsp_hit-frame>
      <Hsp_identity>43</Hsp_identity>
      <Hsp_positive>43</Hsp_positive>
      <Hsp_gaps>0</Hsp_gaps>
      <Hsp_align-len>47</Hsp_align-len>
      <Hsp_qseq>ATCGCTTCTCGGCCTTTTGGCTAAGATCAAGTGTAGTATCTGTTCTT</Hsp_qseq>
      <Hsp_hseq>ATCGCTTTTCGGCCTAATGGCTAAGATCAAGGGTAGTATCTGTTCTT</Hsp_hseq>
      <Hsp_midline>||||||| |||||||  |||||||||||||| |||||||||||||||</Hsp_midline>
    </Hsp>
    <Hsp>
      <Hsp_num>5</Hsp_num>
      <Hsp_bit-score>61.6992</Hsp_bit-score>
      <Hsp_score>67</Hsp_score>
      <Hsp_evalue>2.90164e-07</Hsp_evalue>
      <Hsp_query-from>35</Hsp_query-from>
      <Hsp_query-to>106</Hsp_query-to>
      <Hsp_hit-from>8308</Hsp_hit-from>
      <Hsp_hit-to>8379</Hsp_hit-to>
      <Hsp_query-frame>1</Hsp_query-frame>
      <Hsp_hit-frame>1</Hsp_hit-frame>
      <Hsp_identity>59</Hsp_identity>
      <Hsp_positive>59</Hsp_positive>
      <Hsp_gaps>4</Hsp_gaps>
      <Hsp_align-len>74</Hsp_align-len>
      <Hsp_qseq>AGTATCTGTTCTTATCAGTTTAATATCTGATACGTC--CTCTATCCGAGGACAATATATTAAATGGATTTTTGG</Hsp_qseq>
      <Hsp_hseq>AGTATCTGTTCTTATCAGTTTAATATCTGGTACGCCGGCACAGTCC--GGCTCATATATTAATCTGATTTTTGG</Hsp_hseq>
      <Hsp_midline>||||||||||||||||||||||||||||| |||| |  | |  |||  ||   |||||||||   |||||||||</Hsp_midline>
    </Hsp>
  </Hit_hsps>
</Hit>
<Hit>
  <Hit_num>42</Hit_num>
  <Hit_id>gi|443574929|ref|NW_004182753.1|</Hit_id>
  <Hit_def>Hydra vulgaris strain 105 unplaced genomic scaffold, Hydra_RP_1.0 HYDRAscaffold_23412</Hit_def>
  <Hit_accession>NW_004182753</Hit_accession>
  <Hit_len>4475</Hit_len>
  <Hit_hsps>
    <Hsp>
      <Hsp_num>1</Hsp_num>
      <Hsp_bit-score>113.997</Hsp_bit-score>
      <Hsp_score>125</Hsp_score>
      <Hsp_evalue>5.24166e-23</Hsp_evalue>
      <Hsp_query-from>1</Hsp_query-from>
      <Hsp_query-to>106</Hsp_query-to>
      <Hsp_hit-from>4137</Hsp_hit-from>
      <Hsp_hit-to>4032</Hsp_hit-to>
      <Hsp_query-frame>1</Hsp_query-frame>
      <Hsp_hit-frame>-1</Hsp_hit-frame>
      <Hsp_identity>91</Hsp_identity>
      <Hsp_positive>91</Hsp_positive>
      <Hsp_gaps>4</Hsp_gaps>
      <Hsp_align-len>108</Hsp_align-len>
      <Hsp_qseq>ATCGCTTCTCGGCCTTTTGGCTAAGATCAAGTGTAGTATCTGTTCTTATCAGTTTAATATCTGATACGTC--CTCTATCCGAGGACAATATATTAAATGGATTTTTGG</Hsp_qseq>
      <Hsp_hseq>ATCGCTTCTCGGCCTAATGGCTAAGATCAAGTGTAGTATCTGTTCTTATCAGTTTAATATCTGGTACGCCGGCACAGTCC--GGCTCATATATTAATCTGATTTTTGG</Hsp_hseq>
      <Hsp_midline>|||||||||||||||  |||||||||||||||||||||||||||||||||||||||||||||| |||| |  | |  |||  ||   |||||||||   |||||||||</Hsp_midline>
    </Hsp>
    <Hsp>
      <Hsp_num>2</Hsp_num>
      <Hsp_bit-score>92.3564</Hsp_bit-score>
      <Hsp_score>101</Hsp_score>
      <Hsp_evalue>1.71351e-16</Hsp_evalue>
      <Hsp_query-from>18</Hsp_query-from>
      <Hsp_query-to>106</Hsp_query-to>
      <Hsp_hit-from>4474</Hsp_hit-from>
      <Hsp_hit-to>4386</Hsp_hit-to>
      <Hsp_query-frame>1</Hsp_query-frame>
      <Hsp_hit-frame>-1</Hsp_hit-frame>
      <Hsp_identity>76</Hsp_identity>
      <Hsp_positive>76</Hsp_positive>
      <Hsp_gaps>4</Hsp_gaps>
      <Hsp_align-len>91</Hsp_align-len>
      <Hsp_qseq>TGGCTAAGATCAAGTGTAGTATCTGTTCTTATCAGTTTAATATCTGATACGTC--CTCTATCCGAGGACAATATATTAAATGGATTTTTGG</Hsp_qseq>
      <Hsp_hseq>TGGCTAAGATCAAGTGTAGTATCTGTTCTTATCAGTTTAATATCTGGTACGCCGGCACAGTCC--GGCTCATATATTAATCTGATTTTTGG</Hsp_hseq>
      <Hsp_midline>|||||||||||||||||||||||||||||||||||||||||||||| |||| |  | |  |||  ||   |||||||||   |||||||||</Hsp_midline>
    </Hsp>
    <Hsp>
      <Hsp_num>3</Hsp_num>
      <Hsp_bit-score>86.0446</Hsp_bit-score>
      <Hsp_score>94</Hsp_score>
      <Hsp_evalue>7.28602e-15</Hsp_evalue>
      <Hsp_query-from>1</Hsp_query-from>
      <Hsp_query-to>52</Hsp_query-to>
      <Hsp_hit-from>867</Hsp_hit-from>
      <Hsp_hit-to>816</Hsp_hit-to>
      <Hsp_query-frame>1</Hsp_query-frame>
      <Hsp_hit-frame>-1</Hsp_hit-frame>
      <Hsp_identity>50</Hsp_identity>
      <Hsp_positive>50</Hsp_positive>
      <Hsp_gaps>0</Hsp_gaps>
      <Hsp_align-len>52</Hsp_align-len>
      <Hsp_qseq>ATCGCTTCTCGGCCTTTTGGCTAAGATCAAGTGTAGTATCTGTTCTTATCAG</Hsp_qseq>
      <Hsp_hseq>ATCGCTTCTCGGCCTAATGGCTAAGATCAAGTGTAGTATCTGTTCTTATCAG</Hsp_hseq>
      <Hsp_midline>|||||||||||||||  |||||||||||||||||||||||||||||||||||</Hsp_midline>
    </Hsp>
    <Hsp>
      <Hsp_num>4</Hsp_num>
      <Hsp_bit-score>80.6345</Hsp_bit-score>
      <Hsp_score>88</Hsp_score>
      <Hsp_evalue>3.09809e-13</Hsp_evalue>
      <Hsp_query-from>1</Hsp_query-from>
      <Hsp_query-to>49</Hsp_query-to>
      <Hsp_hit-from>774</Hsp_hit-from>
      <Hsp_hit-to>726</Hsp_hit-to>
      <Hsp_query-frame>1</Hsp_query-frame>
      <Hsp_hit-frame>-1</Hsp_hit-frame>
      <Hsp_identity>47</Hsp_identity>
      <Hsp_positive>47</Hsp_positive>
      <Hsp_gaps>0</Hsp_gaps>
      <Hsp_align-len>49</Hsp_align-len>
      <Hsp_qseq>ATCGCTTCTCGGCCTTTTGGCTAAGATCAAGTGTAGTATCTGTTCTTAT</Hsp_qseq>
      <Hsp_hseq>ATCGCTTCTCGGCCTAATGGCTAAGATCAAGTGTAGTATCTGTTCTTAT</Hsp_hseq>
      <Hsp_midline>|||||||||||||||  ||||||||||||||||||||||||||||||||</Hsp_midline>
    </Hsp>
    <Hsp>
      <Hsp_num>5</Hsp_num>
      <Hsp_bit-score>77.0278</Hsp_bit-score>
      <Hsp_score>84</Hsp_score>
      <Hsp_evalue>3.77425e-12</Hsp_evalue>
      <Hsp_query-from>1</Hsp_query-from>
      <Hsp_query-to>47</Hsp_query-to>
      <Hsp_hit-from>3770</Hsp_hit-from>
      <Hsp_hit-to>3724</Hsp_hit-to>
      <Hsp_query-frame>1</Hsp_query-frame>
      <Hsp_hit-frame>-1</Hsp_hit-frame>
      <Hsp_identity>45</Hsp_identity>
      <Hsp_positive>45</Hsp_positive>
      <Hsp_gaps>0</Hsp_gaps>
      <Hsp_align-len>47</Hsp_align-len>
      <Hsp_qseq>ATCGCTTCTCGGCCTTTTGGCTAAGATCAAGTGTAGTATCTGTTCTT</Hsp_qseq>
      <Hsp_hseq>ATCGCTTCTCGGCCTAATGGCTAAGATCAAGTGTAGTATCTGTTCTT</Hsp_hseq>
      <Hsp_midline>|||||||||||||||  ||||||||||||||||||||||||||||||</Hsp_midline>
    </Hsp>
    <Hsp>
      <Hsp_num>6</Hsp_num>
      <Hsp_bit-score>61.6992</Hsp_bit-score>
      <Hsp_score>67</Hsp_score>
      <Hsp_evalue>2.90164e-07</Hsp_evalue>
      <Hsp_query-from>35</Hsp_query-from>
      <Hsp_query-to>106</Hsp_query-to>
      <Hsp_hit-from>342</Hsp_hit-from>
      <Hsp_hit-to>271</Hsp_hit-to>
      <Hsp_query-frame>1</Hsp_query-frame>
      <Hsp_hit-frame>-1</Hsp_hit-frame>
      <Hsp_identity>59</Hsp_identity>
      <Hsp_positive>59</Hsp_positive>
      <Hsp_gaps>4</Hsp_gaps>
      <Hsp_align-len>74</Hsp_align-len>
      <Hsp_qseq>AGTATCTGTTCTTATCAGTTTAATATCTGATACGTC--CTCTATCCGAGGACAATATATTAAATGGATTTTTGG</Hsp_qseq>
      <Hsp_hseq>AGTATCTGTTCTTATCAGTTTAATATCTGGTACGCCGGCACAGTCC--GGCTCATATATTAATCTGATTTTTGG</Hsp_hseq>
      <Hsp_midline>||||||||||||||||||||||||||||| |||| |  | |  |||  ||   |||||||||   |||||||||</Hsp_midline>
    </Hsp>
    <Hsp>
      <Hsp_num>7</Hsp_num>
      <Hsp_bit-score>61.6992</Hsp_bit-score>
      <Hsp_score>67</Hsp_score>
      <Hsp_evalue>2.90164e-07</Hsp_evalue>
      <Hsp_query-from>35</Hsp_query-from>
      <Hsp_query-to>106</Hsp_query-to>
      <Hsp_hit-from>1200</Hsp_hit-from>
      <Hsp_hit-to>1129</Hsp_hit-to>
      <Hsp_query-frame>1</Hsp_query-frame>
      <Hsp_hit-frame>-1</Hsp_hit-frame>
      <Hsp_identity>59</Hsp_identity>
      <Hsp_positive>59</Hsp_positive>
      <Hsp_gaps>4</Hsp_gaps>
      <Hsp_align-len>74</Hsp_align-len>
      <Hsp_qseq>AGTATCTGTTCTTATCAGTTTAATATCTGATACGTC--CTCTATCCGAGGACAATATATTAAATGGATTTTTGG</Hsp_qseq>
      <Hsp_hseq>AGTATCTGTTCTTATCAGTTTAATATCTGGTACGCCGGCACAGTCC--GGCTCATATATTAATCTGATTTTTGG</Hsp_hseq>
      <Hsp_midline>||||||||||||||||||||||||||||| |||| |  | |  |||  ||   |||||||||   |||||||||</Hsp_midline>
    </Hsp>
  </Hit_hsps>
</Hit>
<Hit>
  <Hit_num>43</Hit_num>
  <Hit_id>gi|443574475|ref|NW_004183207.1|</Hit_id>
  <Hit_def>Hydra vulgaris strain 105 unplaced genomic scaffold, Hydra_RP_1.0 HYDRAscaffold_22954</Hit_def>
  <Hit_accession>NW_004183207</Hit_accession>
  <Hit_len>4121</Hit_len>
  <Hit_hsps>
    <Hsp>
      <Hsp_num>1</Hsp_num>
      <Hsp_bit-score>113.997</Hsp_bit-score>
      <Hsp_score>125</Hsp_score>
      <Hsp_evalue>5.24166e-23</Hsp_evalue>
      <Hsp_query-from>1</Hsp_query-from>
      <Hsp_query-to>106</Hsp_query-to>
      <Hsp_hit-from>331</Hsp_hit-from>
      <Hsp_hit-to>436</Hsp_hit-to>
      <Hsp_query-frame>1</Hsp_query-frame>
      <Hsp_hit-frame>1</Hsp_hit-frame>
      <Hsp_identity>91</Hsp_identity>
      <Hsp_positive>91</Hsp_positive>
      <Hsp_gaps>4</Hsp_gaps>
      <Hsp_align-len>108</Hsp_align-len>
      <Hsp_qseq>ATCGCTTCTCGGCCTTTTGGCTAAGATCAAGTGTAGTATCTGTTCTTATCAGTTTAATATCTGATACGTC--CTCTATCCGAGGACAATATATTAAATGGATTTTTGG</Hsp_qseq>
      <Hsp_hseq>ATCGCTTCTCGGCCTAATGGCTAAGATCAAGTGTAGTATCTGTTCTTATCAGTTTAATATCTGGTACGCCGGCACAGTCC--GGCTCATATATTAATCTGATTTTTGG</Hsp_hseq>
      <Hsp_midline>|||||||||||||||  |||||||||||||||||||||||||||||||||||||||||||||| |||| |  | |  |||  ||   |||||||||   |||||||||</Hsp_midline>
    </Hsp>
    <Hsp>
      <Hsp_num>2</Hsp_num>
      <Hsp_bit-score>113.997</Hsp_bit-score>
      <Hsp_score>125</Hsp_score>
      <Hsp_evalue>5.24166e-23</Hsp_evalue>
      <Hsp_query-from>1</Hsp_query-from>
      <Hsp_query-to>106</Hsp_query-to>
      <Hsp_hit-from>2259</Hsp_hit-from>
      <Hsp_hit-to>2364</Hsp_hit-to>
      <Hsp_query-frame>1</Hsp_query-frame>
      <Hsp_hit-frame>1</Hsp_hit-frame>
      <Hsp_identity>91</Hsp_identity>
      <Hsp_positive>91</Hsp_positive>
      <Hsp_gaps>4</Hsp_gaps>
      <Hsp_align-len>108</Hsp_align-len>
      <Hsp_qseq>ATCGCTTCTCGGCCTTTTGGCTAAGATCAAGTGTAGTATCTGTTCTTATCAGTTTAATATCTGATACGTC--CTCTATCCGAGGACAATATATTAAATGGATTTTTGG</Hsp_qseq>
      <Hsp_hseq>ATCGCTTCTCGGCCTAATGGCTAAGATCAAGTGTAGTATCTGTTCTTATCAGTTTAATATCTGGTACGCCGGCACAGTCC--GGCTCATATATTAATCTGATTTTTGG</Hsp_hseq>
      <Hsp_midline>|||||||||||||||  |||||||||||||||||||||||||||||||||||||||||||||| |||| |  | |  |||  ||   |||||||||   |||||||||</Hsp_midline>
    </Hsp>
    <Hsp>
      <Hsp_num>3</Hsp_num>
      <Hsp_bit-score>80.6345</Hsp_bit-score>
      <Hsp_score>88</Hsp_score>
      <Hsp_evalue>3.09809e-13</Hsp_evalue>
      <Hsp_query-from>1</Hsp_query-from>
      <Hsp_query-to>49</Hsp_query-to>
      <Hsp_hit-from>698</Hsp_hit-from>
      <Hsp_hit-to>746</Hsp_hit-to>
      <Hsp_query-frame>1</Hsp_query-frame>
      <Hsp_hit-frame>1</Hsp_hit-frame>
      <Hsp_identity>47</Hsp_identity>
      <Hsp_positive>47</Hsp_positive>
      <Hsp_gaps>0</Hsp_gaps>
      <Hsp_align-len>49</Hsp_align-len>
      <Hsp_qseq>ATCGCTTCTCGGCCTTTTGGCTAAGATCAAGTGTAGTATCTGTTCTTAT</Hsp_qseq>
      <Hsp_hseq>ATCGCTTCTCGGCCTAATGGCTAAGATCAAGTGTAGTATCTGTTCTTAT</Hsp_hseq>
      <Hsp_midline>|||||||||||||||  ||||||||||||||||||||||||||||||||</Hsp_midline>
    </Hsp>
    <Hsp>
      <Hsp_num>4</Hsp_num>
      <Hsp_bit-score>80.6345</Hsp_bit-score>
      <Hsp_score>88</Hsp_score>
      <Hsp_evalue>3.09809e-13</Hsp_evalue>
      <Hsp_query-from>1</Hsp_query-from>
      <Hsp_query-to>49</Hsp_query-to>
      <Hsp_hit-from>1459</Hsp_hit-from>
      <Hsp_hit-to>1507</Hsp_hit-to>
      <Hsp_query-frame>1</Hsp_query-frame>
      <Hsp_hit-frame>1</Hsp_hit-frame>
      <Hsp_identity>47</Hsp_identity>
      <Hsp_positive>47</Hsp_positive>
      <Hsp_gaps>0</Hsp_gaps>
      <Hsp_align-len>49</Hsp_align-len>
      <Hsp_qseq>ATCGCTTCTCGGCCTTTTGGCTAAGATCAAGTGTAGTATCTGTTCTTAT</Hsp_qseq>
      <Hsp_hseq>ATCGCTTCTCGGCCTAATGGCTAAGATCAAGTGTAGTATCTGTTCTTAT</Hsp_hseq>
      <Hsp_midline>|||||||||||||||  ||||||||||||||||||||||||||||||||</Hsp_midline>
    </Hsp>
    <Hsp>
      <Hsp_num>5</Hsp_num>
      <Hsp_bit-score>80.6345</Hsp_bit-score>
      <Hsp_score>88</Hsp_score>
      <Hsp_evalue>3.09809e-13</Hsp_evalue>
      <Hsp_query-from>1</Hsp_query-from>
      <Hsp_query-to>49</Hsp_query-to>
      <Hsp_hit-from>2626</Hsp_hit-from>
      <Hsp_hit-to>2674</Hsp_hit-to>
      <Hsp_query-frame>1</Hsp_query-frame>
      <Hsp_hit-frame>1</Hsp_hit-frame>
      <Hsp_identity>47</Hsp_identity>
      <Hsp_positive>47</Hsp_positive>
      <Hsp_gaps>0</Hsp_gaps>
      <Hsp_align-len>49</Hsp_align-len>
      <Hsp_qseq>ATCGCTTCTCGGCCTTTTGGCTAAGATCAAGTGTAGTATCTGTTCTTAT</Hsp_qseq>
      <Hsp_hseq>ATCGCTTCTCGGCCTAATGGCTAAGATCAAGTGTAGTATCTGTTCTTAT</Hsp_hseq>
      <Hsp_midline>|||||||||||||||  ||||||||||||||||||||||||||||||||</Hsp_midline>
    </Hsp>
    <Hsp>
      <Hsp_num>6</Hsp_num>
      <Hsp_bit-score>80.6345</Hsp_bit-score>
      <Hsp_score>88</Hsp_score>
      <Hsp_evalue>3.09809e-13</Hsp_evalue>
      <Hsp_query-from>1</Hsp_query-from>
      <Hsp_query-to>49</Hsp_query-to>
      <Hsp_hit-from>3380</Hsp_hit-from>
      <Hsp_hit-to>3428</Hsp_hit-to>
      <Hsp_query-frame>1</Hsp_query-frame>
      <Hsp_hit-frame>1</Hsp_hit-frame>
      <Hsp_identity>47</Hsp_identity>
      <Hsp_positive>47</Hsp_positive>
      <Hsp_gaps>0</Hsp_gaps>
      <Hsp_align-len>49</Hsp_align-len>
      <Hsp_qseq>ATCGCTTCTCGGCCTTTTGGCTAAGATCAAGTGTAGTATCTGTTCTTAT</Hsp_qseq>
      <Hsp_hseq>ATCGCTTCTCGGCCTAATGGCTAAGATCAAGTGTAGTATCTGTTCTTAT</Hsp_hseq>
      <Hsp_midline>|||||||||||||||  ||||||||||||||||||||||||||||||||</Hsp_midline>
    </Hsp>
    <Hsp>
      <Hsp_num>7</Hsp_num>
      <Hsp_bit-score>61.6992</Hsp_bit-score>
      <Hsp_score>67</Hsp_score>
      <Hsp_evalue>2.90164e-07</Hsp_evalue>
      <Hsp_query-from>35</Hsp_query-from>
      <Hsp_query-to>106</Hsp_query-to>
      <Hsp_hit-from>1126</Hsp_hit-from>
      <Hsp_hit-to>1197</Hsp_hit-to>
      <Hsp_query-frame>1</Hsp_query-frame>
      <Hsp_hit-frame>1</Hsp_hit-frame>
      <Hsp_identity>59</Hsp_identity>
      <Hsp_positive>59</Hsp_positive>
      <Hsp_gaps>4</Hsp_gaps>
      <Hsp_align-len>74</Hsp_align-len>
      <Hsp_qseq>AGTATCTGTTCTTATCAGTTTAATATCTGATACGTC--CTCTATCCGAGGACAATATATTAAATGGATTTTTGG</Hsp_qseq>
      <Hsp_hseq>AGTATCTGTTCTTATCAGTTTAATATCTGGTACGCCGGCACAGTCC--GGCTCATATATTAATCTGATTTTTGG</Hsp_hseq>
      <Hsp_midline>||||||||||||||||||||||||||||| |||| |  | |  |||  ||   |||||||||   |||||||||</Hsp_midline>
    </Hsp>
    <Hsp>
      <Hsp_num>8</Hsp_num>
      <Hsp_bit-score>61.6992</Hsp_bit-score>
      <Hsp_score>67</Hsp_score>
      <Hsp_evalue>2.90164e-07</Hsp_evalue>
      <Hsp_query-from>35</Hsp_query-from>
      <Hsp_query-to>106</Hsp_query-to>
      <Hsp_hit-from>3047</Hsp_hit-from>
      <Hsp_hit-to>3118</Hsp_hit-to>
      <Hsp_query-frame>1</Hsp_query-frame>
      <Hsp_hit-frame>1</Hsp_hit-frame>
      <Hsp_identity>59</Hsp_identity>
      <Hsp_positive>59</Hsp_positive>
      <Hsp_gaps>4</Hsp_gaps>
      <Hsp_align-len>74</Hsp_align-len>
      <Hsp_qseq>AGTATCTGTTCTTATCAGTTTAATATCTGATACGTC--CTCTATCCGAGGACAATATATTAAATGGATTTTTGG</Hsp_qseq>
      <Hsp_hseq>AGTATCTGTTCTTATCAGTTTAATATCTGGTACGCCGGCACAGTCC--GGCTCATATATTAATCTGATTTTTGG</Hsp_hseq>
      <Hsp_midline>||||||||||||||||||||||||||||| |||| |  | |  |||  ||   |||||||||   |||||||||</Hsp_midline>
    </Hsp>
    <Hsp>
      <Hsp_num>9</Hsp_num>
      <Hsp_bit-score>56.2891</Hsp_bit-score>
      <Hsp_score>61</Hsp_score>
      <Hsp_evalue>1.23381e-05</Hsp_evalue>
      <Hsp_query-from>38</Hsp_query-from>
      <Hsp_query-to>106</Hsp_query-to>
      <Hsp_hit-from>1</Hsp_hit-from>
      <Hsp_hit-to>69</Hsp_hit-to>
      <Hsp_query-frame>1</Hsp_query-frame>
      <Hsp_hit-frame>1</Hsp_hit-frame>
      <Hsp_identity>56</Hsp_identity>
      <Hsp_positive>56</Hsp_positive>
      <Hsp_gaps>4</Hsp_gaps>
      <Hsp_align-len>71</Hsp_align-len>
      <Hsp_qseq>ATCTGTTCTTATCAGTTTAATATCTGATACGTC--CTCTATCCGAGGACAATATATTAAATGGATTTTTGG</Hsp_qseq>
      <Hsp_hseq>ATCTGTTCTTATCAGTTTAATATCTGGTACGCCGGCACAGTCC--GGCTCATATATTAATCTGATTTTTGG</Hsp_hseq>
      <Hsp_midline>|||||||||||||||||||||||||| |||| |  | |  |||  ||   |||||||||   |||||||||</Hsp_midline>
    </Hsp>
  </Hit_hsps>
</Hit>
<Hit>
  <Hit_num>44</Hit_num>
  <Hit_id>gi|443574462|ref|NW_004183220.1|</Hit_id>
  <Hit_def>Hydra vulgaris strain 105 unplaced genomic scaffold, Hydra_RP_1.0 HYDRAscaffold_22941</Hit_def>
  <Hit_accession>NW_004183220</Hit_accession>
  <Hit_len>4113</Hit_len>
  <Hit_hsps>
    <Hsp>
      <Hsp_num>1</Hsp_num>
      <Hsp_bit-score>113.997</Hsp_bit-score>
      <Hsp_score>125</Hsp_score>
      <Hsp_evalue>5.24166e-23</Hsp_evalue>
      <Hsp_query-from>1</Hsp_query-from>
      <Hsp_query-to>106</Hsp_query-to>
      <Hsp_hit-from>2762</Hsp_hit-from>
      <Hsp_hit-to>2867</Hsp_hit-to>
      <Hsp_query-frame>1</Hsp_query-frame>
      <Hsp_hit-frame>1</Hsp_hit-frame>
      <Hsp_identity>91</Hsp_identity>
      <Hsp_positive>91</Hsp_positive>
      <Hsp_gaps>4</Hsp_gaps>
      <Hsp_align-len>108</Hsp_align-len>
      <Hsp_qseq>ATCGCTTCTCGGCCTTTTGGCTAAGATCAAGTGTAGTATCTGTTCTTATCAGTTTAATATCTGATACGTC--CTCTATCCGAGGACAATATATTAAATGGATTTTTGG</Hsp_qseq>
      <Hsp_hseq>ATCGCTTCTCGGCCTAATGGCTAAGATCAAGTGTAGTATCTGTTCTTATCAGTTTAATATCTGGTACGCCGGCACAGTCC--GGCTCATATATTAATCTGATTTTTGG</Hsp_hseq>
      <Hsp_midline>|||||||||||||||  |||||||||||||||||||||||||||||||||||||||||||||| |||| |  | |  |||  ||   |||||||||   |||||||||</Hsp_midline>
    </Hsp>
    <Hsp>
      <Hsp_num>2</Hsp_num>
      <Hsp_bit-score>77.0278</Hsp_bit-score>
      <Hsp_score>84</Hsp_score>
      <Hsp_evalue>3.77425e-12</Hsp_evalue>
      <Hsp_query-from>1</Hsp_query-from>
      <Hsp_query-to>47</Hsp_query-to>
      <Hsp_hit-from>3129</Hsp_hit-from>
      <Hsp_hit-to>3175</Hsp_hit-to>
      <Hsp_query-frame>1</Hsp_query-frame>
      <Hsp_hit-frame>1</Hsp_hit-frame>
      <Hsp_identity>45</Hsp_identity>
      <Hsp_positive>45</Hsp_positive>
      <Hsp_gaps>0</Hsp_gaps>
      <Hsp_align-len>47</Hsp_align-len>
      <Hsp_qseq>ATCGCTTCTCGGCCTTTTGGCTAAGATCAAGTGTAGTATCTGTTCTT</Hsp_qseq>
      <Hsp_hseq>ATCGCTTCTCGGCCTAATGGCTAAGATCAAGTGTAGTATCTGTTCTT</Hsp_hseq>
      <Hsp_midline>|||||||||||||||  ||||||||||||||||||||||||||||||</Hsp_midline>
    </Hsp>
  </Hit_hsps>
</Hit>
<Hit>
  <Hit_num>45</Hit_num>
  <Hit_id>gi|443574295|ref|NW_004183387.1|</Hit_id>
  <Hit_def>Hydra vulgaris strain 105 unplaced genomic scaffold, Hydra_RP_1.0 HYDRAscaffold_22773</Hit_def>
  <Hit_accession>NW_004183387</Hit_accession>
  <Hit_len>3991</Hit_len>
  <Hit_hsps>
    <Hsp>
      <Hsp_num>1</Hsp_num>
      <Hsp_bit-score>113.997</Hsp_bit-score>
      <Hsp_score>125</Hsp_score>
      <Hsp_evalue>5.24166e-23</Hsp_evalue>
      <Hsp_query-from>1</Hsp_query-from>
      <Hsp_query-to>106</Hsp_query-to>
      <Hsp_hit-from>3045</Hsp_hit-from>
      <Hsp_hit-to>3150</Hsp_hit-to>
      <Hsp_query-frame>1</Hsp_query-frame>
      <Hsp_hit-frame>1</Hsp_hit-frame>
      <Hsp_identity>91</Hsp_identity>
      <Hsp_positive>91</Hsp_positive>
      <Hsp_gaps>4</Hsp_gaps>
      <Hsp_align-len>108</Hsp_align-len>
      <Hsp_qseq>ATCGCTTCTCGGCCTTTTGGCTAAGATCAAGTGTAGTATCTGTTCTTATCAGTTTAATATCTGATACGTC--CTCTATCCGAGGACAATATATTAAATGGATTTTTGG</Hsp_qseq>
      <Hsp_hseq>ATCGCTTCTCGGCCTAATGGCTAAGATCAAGTGTAGTATCTGTTCTTATCAGTTTAATATCTGGTACGCCGGCACAGTCC--GGCTCATATATTAATCTGATTTTTGG</Hsp_hseq>
      <Hsp_midline>|||||||||||||||  |||||||||||||||||||||||||||||||||||||||||||||| |||| |  | |  |||  ||   |||||||||   |||||||||</Hsp_midline>
    </Hsp>
    <Hsp>
      <Hsp_num>2</Hsp_num>
      <Hsp_bit-score>42.7638</Hsp_bit-score>
      <Hsp_score>46</Hsp_score>
      <Hsp_evalue>0.0778619</Hsp_evalue>
      <Hsp_query-from>1</Hsp_query-from>
      <Hsp_query-to>28</Hsp_query-to>
      <Hsp_hit-from>3412</Hsp_hit-from>
      <Hsp_hit-to>3439</Hsp_hit-to>
      <Hsp_query-frame>1</Hsp_query-frame>
      <Hsp_hit-frame>1</Hsp_hit-frame>
      <Hsp_identity>26</Hsp_identity>
      <Hsp_positive>26</Hsp_positive>
      <Hsp_gaps>0</Hsp_gaps>
      <Hsp_align-len>28</Hsp_align-len>
      <Hsp_qseq>ATCGCTTCTCGGCCTTTTGGCTAAGATC</Hsp_qseq>
      <Hsp_hseq>ATCGCTTCTCGGCCTAATGGCTAAGATC</Hsp_hseq>
      <Hsp_midline>|||||||||||||||  |||||||||||</Hsp_midline>
    </Hsp>
  </Hit_hsps>
</Hit>
<Hit>
  <Hit_num>46</Hit_num>
  <Hit_id>gi|443574177|ref|NW_004183505.1|</Hit_id>
  <Hit_def>Hydra vulgaris strain 105 unplaced genomic scaffold, Hydra_RP_1.0 HYDRAscaffold_22652</Hit_def>
  <Hit_accession>NW_004183505</Hit_accession>
  <Hit_len>3921</Hit_len>
  <Hit_hsps>
    <Hsp>
      <Hsp_num>1</Hsp_num>
      <Hsp_bit-score>113.997</Hsp_bit-score>
      <Hsp_score>125</Hsp_score>
      <Hsp_evalue>5.24166e-23</Hsp_evalue>
      <Hsp_query-from>1</Hsp_query-from>
      <Hsp_query-to>106</Hsp_query-to>
      <Hsp_hit-from>287</Hsp_hit-from>
      <Hsp_hit-to>182</Hsp_hit-to>
      <Hsp_query-frame>1</Hsp_query-frame>
      <Hsp_hit-frame>-1</Hsp_hit-frame>
      <Hsp_identity>91</Hsp_identity>
      <Hsp_positive>91</Hsp_positive>
      <Hsp_gaps>4</Hsp_gaps>
      <Hsp_align-len>108</Hsp_align-len>
      <Hsp_qseq>ATCGCTTCTCGGCCTTTTGGCTAAGATCAAGTGTAGTATCTGTTCTTATCAGTTTAATATCTGATACGTC--CTCTATCCGAGGACAATATATTAAATGGATTTTTGG</Hsp_qseq>
      <Hsp_hseq>ATCGCTTCTCGGCCTAATGGCTAAGATCAAGTGTAGTATCTGTTCTTATCAGTTTAATATCTGGTACGCCGGCACAGTCC--GGCTCATATATTAATCTGATTTTTGG</Hsp_hseq>
      <Hsp_midline>|||||||||||||||  |||||||||||||||||||||||||||||||||||||||||||||| |||| |  | |  |||  ||   |||||||||   |||||||||</Hsp_midline>
    </Hsp>
    <Hsp>
      <Hsp_num>2</Hsp_num>
      <Hsp_bit-score>113.997</Hsp_bit-score>
      <Hsp_score>125</Hsp_score>
      <Hsp_evalue>5.24166e-23</Hsp_evalue>
      <Hsp_query-from>1</Hsp_query-from>
      <Hsp_query-to>106</Hsp_query-to>
      <Hsp_hit-from>654</Hsp_hit-from>
      <Hsp_hit-to>549</Hsp_hit-to>
      <Hsp_query-frame>1</Hsp_query-frame>
      <Hsp_hit-frame>-1</Hsp_hit-frame>
      <Hsp_identity>91</Hsp_identity>
      <Hsp_positive>91</Hsp_positive>
      <Hsp_gaps>4</Hsp_gaps>
      <Hsp_align-len>108</Hsp_align-len>
      <Hsp_qseq>ATCGCTTCTCGGCCTTTTGGCTAAGATCAAGTGTAGTATCTGTTCTTATCAGTTTAATATCTGATACGTC--CTCTATCCGAGGACAATATATTAAATGGATTTTTGG</Hsp_qseq>
      <Hsp_hseq>ATCGCTTCTCGGCCTAATGGCTAAGATCAAGTGTAGTATCTGTTCTTATCAGTTTAATATCTGGTACGCCGGCACAGTCC--GGCTCATATATTAATCTGATTTTTGG</Hsp_hseq>
      <Hsp_midline>|||||||||||||||  |||||||||||||||||||||||||||||||||||||||||||||| |||| |  | |  |||  ||   |||||||||   |||||||||</Hsp_midline>
    </Hsp>
    <Hsp>
      <Hsp_num>3</Hsp_num>
      <Hsp_bit-score>113.997</Hsp_bit-score>
      <Hsp_score>125</Hsp_score>
      <Hsp_evalue>5.24166e-23</Hsp_evalue>
      <Hsp_query-from>1</Hsp_query-from>
      <Hsp_query-to>106</Hsp_query-to>
      <Hsp_hit-from>1021</Hsp_hit-from>
      <Hsp_hit-to>916</Hsp_hit-to>
      <Hsp_query-frame>1</Hsp_query-frame>
      <Hsp_hit-frame>-1</Hsp_hit-frame>
      <Hsp_identity>91</Hsp_identity>
      <Hsp_positive>91</Hsp_positive>
      <Hsp_gaps>4</Hsp_gaps>
      <Hsp_align-len>108</Hsp_align-len>
      <Hsp_qseq>ATCGCTTCTCGGCCTTTTGGCTAAGATCAAGTGTAGTATCTGTTCTTATCAGTTTAATATCTGATACGTC--CTCTATCCGAGGACAATATATTAAATGGATTTTTGG</Hsp_qseq>
      <Hsp_hseq>ATCGCTTCTCGGCCTAATGGCTAAGATCAAGTGTAGTATCTGTTCTTATCAGTTTAATATCTGGTACGCCGGCACAGTCC--GGCTCATATATTAATCTGATTTTTGG</Hsp_hseq>
      <Hsp_midline>|||||||||||||||  |||||||||||||||||||||||||||||||||||||||||||||| |||| |  | |  |||  ||   |||||||||   |||||||||</Hsp_midline>
    </Hsp>
    <Hsp>
      <Hsp_num>4</Hsp_num>
      <Hsp_bit-score>113.997</Hsp_bit-score>
      <Hsp_score>125</Hsp_score>
      <Hsp_evalue>5.24166e-23</Hsp_evalue>
      <Hsp_query-from>1</Hsp_query-from>
      <Hsp_query-to>106</Hsp_query-to>
      <Hsp_hit-from>3264</Hsp_hit-from>
      <Hsp_hit-to>3159</Hsp_hit-to>
      <Hsp_query-frame>1</Hsp_query-frame>
      <Hsp_hit-frame>-1</Hsp_hit-frame>
      <Hsp_identity>91</Hsp_identity>
      <Hsp_positive>91</Hsp_positive>
      <Hsp_gaps>4</Hsp_gaps>
      <Hsp_align-len>108</Hsp_align-len>
      <Hsp_qseq>ATCGCTTCTCGGCCTTTTGGCTAAGATCAAGTGTAGTATCTGTTCTTATCAGTTTAATATCTGATACGTC--CTCTATCCGAGGACAATATATTAAATGGATTTTTGG</Hsp_qseq>
      <Hsp_hseq>ATCGCTTCTCGGCCTAATGGCTAAGATCAAGTGTAGTATCTGTTCTTATCAGTTTAATATCTGGTACGCCGGCACAGTCC--GGCTCATATATTAATCTGATTTTTGG</Hsp_hseq>
      <Hsp_midline>|||||||||||||||  |||||||||||||||||||||||||||||||||||||||||||||| |||| |  | |  |||  ||   |||||||||   |||||||||</Hsp_midline>
    </Hsp>
    <Hsp>
      <Hsp_num>5</Hsp_num>
      <Hsp_bit-score>113.997</Hsp_bit-score>
      <Hsp_score>125</Hsp_score>
      <Hsp_evalue>5.24166e-23</Hsp_evalue>
      <Hsp_query-from>1</Hsp_query-from>
      <Hsp_query-to>106</Hsp_query-to>
      <Hsp_hit-from>3631</Hsp_hit-from>
      <Hsp_hit-to>3526</Hsp_hit-to>
      <Hsp_query-frame>1</Hsp_query-frame>
      <Hsp_hit-frame>-1</Hsp_hit-frame>
      <Hsp_identity>91</Hsp_identity>
      <Hsp_positive>91</Hsp_positive>
      <Hsp_gaps>4</Hsp_gaps>
      <Hsp_align-len>108</Hsp_align-len>
      <Hsp_qseq>ATCGCTTCTCGGCCTTTTGGCTAAGATCAAGTGTAGTATCTGTTCTTATCAGTTTAATATCTGATACGTC--CTCTATCCGAGGACAATATATTAAATGGATTTTTGG</Hsp_qseq>
      <Hsp_hseq>ATCGCTTCTCGGCCTAATGGCTAAGATCAAGTGTAGTATCTGTTCTTATCAGTTTAATATCTGGTACGCCGGCACAGTCC--GGCTCATATATTAATCTGATTTTTGG</Hsp_hseq>
      <Hsp_midline>|||||||||||||||  |||||||||||||||||||||||||||||||||||||||||||||| |||| |  | |  |||  ||   |||||||||   |||||||||</Hsp_midline>
    </Hsp>
    <Hsp>
      <Hsp_num>6</Hsp_num>
      <Hsp_bit-score>102.275</Hsp_bit-score>
      <Hsp_score>112</Hsp_score>
      <Hsp_evalue>9.47714e-20</Hsp_evalue>
      <Hsp_query-from>1</Hsp_query-from>
      <Hsp_query-to>68</Hsp_query-to>
      <Hsp_hit-from>2897</Hsp_hit-from>
      <Hsp_hit-to>2831</Hsp_hit-to>
      <Hsp_query-frame>1</Hsp_query-frame>
      <Hsp_hit-frame>-1</Hsp_hit-frame>
      <Hsp_identity>64</Hsp_identity>
      <Hsp_positive>64</Hsp_positive>
      <Hsp_gaps>1</Hsp_gaps>
      <Hsp_align-len>68</Hsp_align-len>
      <Hsp_qseq>ATCGCTTCTCGGCCTTTTGGCTAAGATCAAGTGTAGTATCTGTTCTTATCAGTTTAATATCTGATACG</Hsp_qseq>
      <Hsp_hseq>ATCGCTTCTCGGCCTAATGGCTAAGATCAAGTGTAGTATCTGTTC-TATCAGTTTAATATCTGGTACG</Hsp_hseq>
      <Hsp_midline>|||||||||||||||  |||||||||||||||||||||||||||| ||||||||||||||||| ||||</Hsp_midline>
    </Hsp>
  </Hit_hsps>
</Hit>
<Hit>
  <Hit_num>47</Hit_num>
  <Hit_id>gi|443574128|ref|NW_004183554.1|</Hit_id>
  <Hit_def>Hydra vulgaris strain 105 unplaced genomic scaffold, Hydra_RP_1.0 HYDRAscaffold_22603</Hit_def>
  <Hit_accession>NW_004183554</Hit_accession>
  <Hit_len>3896</Hit_len>
  <Hit_hsps>
    <Hsp>
      <Hsp_num>1</Hsp_num>
      <Hsp_bit-score>113.997</Hsp_bit-score>
      <Hsp_score>125</Hsp_score>
      <Hsp_evalue>5.24166e-23</Hsp_evalue>
      <Hsp_query-from>1</Hsp_query-from>
      <Hsp_query-to>106</Hsp_query-to>
      <Hsp_hit-from>2712</Hsp_hit-from>
      <Hsp_hit-to>2817</Hsp_hit-to>
      <Hsp_query-frame>1</Hsp_query-frame>
      <Hsp_hit-frame>1</Hsp_hit-frame>
      <Hsp_identity>91</Hsp_identity>
      <Hsp_positive>91</Hsp_positive>
      <Hsp_gaps>4</Hsp_gaps>
      <Hsp_align-len>108</Hsp_align-len>
      <Hsp_qseq>ATCGCTTCTCGGCCTTTTGGCTAAGATCAAGTGTAGTATCTGTTCTTATCAGTTTAATATCTGATACGTC--CTCTATCCGAGGACAATATATTAAATGGATTTTTGG</Hsp_qseq>
      <Hsp_hseq>ATCGCTTCTCGGCCTAATGGCTAAGATCAAGTGTAGTATCTGTTCTTATCAGTTTAATATCTGGTACGCCGGCACAGTCC--GGCTCATATATTAATCTGATTTTTGG</Hsp_hseq>
      <Hsp_midline>|||||||||||||||  |||||||||||||||||||||||||||||||||||||||||||||| |||| |  | |  |||  ||   |||||||||   |||||||||</Hsp_midline>
    </Hsp>
    <Hsp>
      <Hsp_num>2</Hsp_num>
      <Hsp_bit-score>77.0278</Hsp_bit-score>
      <Hsp_score>84</Hsp_score>
      <Hsp_evalue>3.77425e-12</Hsp_evalue>
      <Hsp_query-from>1</Hsp_query-from>
      <Hsp_query-to>47</Hsp_query-to>
      <Hsp_hit-from>376</Hsp_hit-from>
      <Hsp_hit-to>422</Hsp_hit-to>
      <Hsp_query-frame>1</Hsp_query-frame>
      <Hsp_hit-frame>1</Hsp_hit-frame>
      <Hsp_identity>45</Hsp_identity>
      <Hsp_positive>45</Hsp_positive>
      <Hsp_gaps>0</Hsp_gaps>
      <Hsp_align-len>47</Hsp_align-len>
      <Hsp_qseq>ATCGCTTCTCGGCCTTTTGGCTAAGATCAAGTGTAGTATCTGTTCTT</Hsp_qseq>
      <Hsp_hseq>ATCGCTTCTCGGCCTAATGGCTAAGATCAAGTGTAGTATCTGTTCTT</Hsp_hseq>
      <Hsp_midline>|||||||||||||||  ||||||||||||||||||||||||||||||</Hsp_midline>
    </Hsp>
    <Hsp>
      <Hsp_num>3</Hsp_num>
      <Hsp_bit-score>57.1907</Hsp_bit-score>
      <Hsp_score>62</Hsp_score>
      <Hsp_evalue>3.53492e-06</Hsp_evalue>
      <Hsp_query-from>35</Hsp_query-from>
      <Hsp_query-to>106</Hsp_query-to>
      <Hsp_hit-from>43</Hsp_hit-from>
      <Hsp_hit-to>114</Hsp_hit-to>
      <Hsp_query-frame>1</Hsp_query-frame>
      <Hsp_hit-frame>1</Hsp_hit-frame>
      <Hsp_identity>58</Hsp_identity>
      <Hsp_positive>58</Hsp_positive>
      <Hsp_gaps>4</Hsp_gaps>
      <Hsp_align-len>74</Hsp_align-len>
      <Hsp_qseq>AGTATCTGTTCTTATCAGTTTAATATCTGATACGTC--CTCTATCCGAGGACAATATATTAAATGGATTTTTGG</Hsp_qseq>
      <Hsp_hseq>AGTATCTGTTCTTAACAGTTTAATATCTGGTACGCCGGCACAGTCC--GGCTCATATATTAATCTGATTTTTGG</Hsp_hseq>
      <Hsp_midline>|||||||||||||| |||||||||||||| |||| |  | |  |||  ||   |||||||||   |||||||||</Hsp_midline>
    </Hsp>
    <Hsp>
      <Hsp_num>4</Hsp_num>
      <Hsp_bit-score>42.7638</Hsp_bit-score>
      <Hsp_score>46</Hsp_score>
      <Hsp_evalue>0.0778619</Hsp_evalue>
      <Hsp_query-from>1</Hsp_query-from>
      <Hsp_query-to>28</Hsp_query-to>
      <Hsp_hit-from>3079</Hsp_hit-from>
      <Hsp_hit-to>3106</Hsp_hit-to>
      <Hsp_query-frame>1</Hsp_query-frame>
      <Hsp_hit-frame>1</Hsp_hit-frame>
      <Hsp_identity>26</Hsp_identity>
      <Hsp_positive>26</Hsp_positive>
      <Hsp_gaps>0</Hsp_gaps>
      <Hsp_align-len>28</Hsp_align-len>
      <Hsp_qseq>ATCGCTTCTCGGCCTTTTGGCTAAGATC</Hsp_qseq>
      <Hsp_hseq>ATCGCTTCTCGGCCTAATGGCTAAGATC</Hsp_hseq>
      <Hsp_midline>|||||||||||||||  |||||||||||</Hsp_midline>
    </Hsp>
  </Hit_hsps>
</Hit>
<Hit>
  <Hit_num>48</Hit_num>
  <Hit_id>gi|443573781|ref|NW_004183901.1|</Hit_id>
  <Hit_def>Hydra vulgaris strain 105 unplaced genomic scaffold, Hydra_RP_1.0 HYDRAscaffold_22251</Hit_def>
  <Hit_accession>NW_004183901</Hit_accession>
  <Hit_len>3672</Hit_len>
  <Hit_hsps>
    <Hsp>
      <Hsp_num>1</Hsp_num>
      <Hsp_bit-score>113.997</Hsp_bit-score>
      <Hsp_score>125</Hsp_score>
      <Hsp_evalue>5.24166e-23</Hsp_evalue>
      <Hsp_query-from>1</Hsp_query-from>
      <Hsp_query-to>106</Hsp_query-to>
      <Hsp_hit-from>223</Hsp_hit-from>
      <Hsp_hit-to>118</Hsp_hit-to>
      <Hsp_query-frame>1</Hsp_query-frame>
      <Hsp_hit-frame>-1</Hsp_hit-frame>
      <Hsp_identity>91</Hsp_identity>
      <Hsp_positive>91</Hsp_positive>
      <Hsp_gaps>4</Hsp_gaps>
      <Hsp_align-len>108</Hsp_align-len>
      <Hsp_qseq>ATCGCTTCTCGGCCTTTTGGCTAAGATCAAGTGTAGTATCTGTTCTTATCAGTTTAATATCTGATACGTC--CTCTATCCGAGGACAATATATTAAATGGATTTTTGG</Hsp_qseq>
      <Hsp_hseq>ATCGCTTCTCGGCCTAATGGCTAAGATCAAGTGTAGTATCTGTTCTTATCAGTTTAATATCTGGTACGCCGGCACAGTCC--GGCTCATATATTAATCTGATTTTTGG</Hsp_hseq>
      <Hsp_midline>|||||||||||||||  |||||||||||||||||||||||||||||||||||||||||||||| |||| |  | |  |||  ||   |||||||||   |||||||||</Hsp_midline>
    </Hsp>
    <Hsp>
      <Hsp_num>2</Hsp_num>
      <Hsp_bit-score>82.4379</Hsp_bit-score>
      <Hsp_score>90</Hsp_score>
      <Hsp_evalue>8.87619e-14</Hsp_evalue>
      <Hsp_query-from>1</Hsp_query-from>
      <Hsp_query-to>50</Hsp_query-to>
      <Hsp_hit-from>839</Hsp_hit-from>
      <Hsp_hit-to>790</Hsp_hit-to>
      <Hsp_query-frame>1</Hsp_query-frame>
      <Hsp_hit-frame>-1</Hsp_hit-frame>
      <Hsp_identity>48</Hsp_identity>
      <Hsp_positive>48</Hsp_positive>
      <Hsp_gaps>0</Hsp_gaps>
      <Hsp_align-len>50</Hsp_align-len>
      <Hsp_qseq>ATCGCTTCTCGGCCTTTTGGCTAAGATCAAGTGTAGTATCTGTTCTTATC</Hsp_qseq>
      <Hsp_hseq>ATCGCTTCTCGGCCTAATGGCTAAGATCAAGTGTAGTATCTGTTCTTATC</Hsp_hseq>
      <Hsp_midline>|||||||||||||||  |||||||||||||||||||||||||||||||||</Hsp_midline>
    </Hsp>
    <Hsp>
      <Hsp_num>3</Hsp_num>
      <Hsp_bit-score>77.0278</Hsp_bit-score>
      <Hsp_score>84</Hsp_score>
      <Hsp_evalue>3.77425e-12</Hsp_evalue>
      <Hsp_query-from>1</Hsp_query-from>
      <Hsp_query-to>47</Hsp_query-to>
      <Hsp_hit-from>3567</Hsp_hit-from>
      <Hsp_hit-to>3521</Hsp_hit-to>
      <Hsp_query-frame>1</Hsp_query-frame>
      <Hsp_hit-frame>-1</Hsp_hit-frame>
      <Hsp_identity>45</Hsp_identity>
      <Hsp_positive>45</Hsp_positive>
      <Hsp_gaps>0</Hsp_gaps>
      <Hsp_align-len>47</Hsp_align-len>
      <Hsp_qseq>ATCGCTTCTCGGCCTTTTGGCTAAGATCAAGTGTAGTATCTGTTCTT</Hsp_qseq>
      <Hsp_hseq>ATCGCTTCTCGGCCTAATGGCTAAGATCAAGTGTAGTATCTGTTCTT</Hsp_hseq>
      <Hsp_midline>|||||||||||||||  ||||||||||||||||||||||||||||||</Hsp_midline>
    </Hsp>
    <Hsp>
      <Hsp_num>4</Hsp_num>
      <Hsp_bit-score>61.6992</Hsp_bit-score>
      <Hsp_score>67</Hsp_score>
      <Hsp_evalue>2.90164e-07</Hsp_evalue>
      <Hsp_query-from>35</Hsp_query-from>
      <Hsp_query-to>106</Hsp_query-to>
      <Hsp_hit-from>556</Hsp_hit-from>
      <Hsp_hit-to>485</Hsp_hit-to>
      <Hsp_query-frame>1</Hsp_query-frame>
      <Hsp_hit-frame>-1</Hsp_hit-frame>
      <Hsp_identity>59</Hsp_identity>
      <Hsp_positive>59</Hsp_positive>
      <Hsp_gaps>4</Hsp_gaps>
      <Hsp_align-len>74</Hsp_align-len>
      <Hsp_qseq>AGTATCTGTTCTTATCAGTTTAATATCTGATACGTC--CTCTATCCGAGGACAATATATTAAATGGATTTTTGG</Hsp_qseq>
      <Hsp_hseq>AGTATCTGTTCTTATCAGTTTAATATCTGGTACGCCGGCACAGTCC--GGCTCATATATTAATCTGATTTTTGG</Hsp_hseq>
      <Hsp_midline>||||||||||||||||||||||||||||| |||| |  | |  |||  ||   |||||||||   |||||||||</Hsp_midline>
    </Hsp>
    <Hsp>
      <Hsp_num>5</Hsp_num>
      <Hsp_bit-score>61.6992</Hsp_bit-score>
      <Hsp_score>67</Hsp_score>
      <Hsp_evalue>2.90164e-07</Hsp_evalue>
      <Hsp_query-from>35</Hsp_query-from>
      <Hsp_query-to>106</Hsp_query-to>
      <Hsp_hit-from>1172</Hsp_hit-from>
      <Hsp_hit-to>1101</Hsp_hit-to>
      <Hsp_query-frame>1</Hsp_query-frame>
      <Hsp_hit-frame>-1</Hsp_hit-frame>
      <Hsp_identity>59</Hsp_identity>
      <Hsp_positive>59</Hsp_positive>
      <Hsp_gaps>4</Hsp_gaps>
      <Hsp_align-len>74</Hsp_align-len>
      <Hsp_qseq>AGTATCTGTTCTTATCAGTTTAATATCTGATACGTC--CTCTATCCGAGGACAATATATTAAATGGATTTTTGG</Hsp_qseq>
      <Hsp_hseq>AGTATCTGTTCTTATCAGTTTAATATCTGGTACGCCGGCACAGTCC--GGCTCATATATTAATCTGATTTTTGG</Hsp_hseq>
      <Hsp_midline>||||||||||||||||||||||||||||| |||| |  | |  |||  ||   |||||||||   |||||||||</Hsp_midline>
    </Hsp>
  </Hit_hsps>
</Hit>
<Hit>
  <Hit_num>49</Hit_num>
  <Hit_id>gi|443573476|ref|NW_004184206.1|</Hit_id>
  <Hit_def>Hydra vulgaris strain 105 unplaced genomic scaffold, Hydra_RP_1.0 HYDRAscaffold_21936</Hit_def>
  <Hit_accession>NW_004184206</Hit_accession>
  <Hit_len>3485</Hit_len>
  <Hit_hsps>
    <Hsp>
      <Hsp_num>1</Hsp_num>
      <Hsp_bit-score>113.997</Hsp_bit-score>
      <Hsp_score>125</Hsp_score>
      <Hsp_evalue>5.24166e-23</Hsp_evalue>
      <Hsp_query-from>1</Hsp_query-from>
      <Hsp_query-to>106</Hsp_query-to>
      <Hsp_hit-from>535</Hsp_hit-from>
      <Hsp_hit-to>430</Hsp_hit-to>
      <Hsp_query-frame>1</Hsp_query-frame>
      <Hsp_hit-frame>-1</Hsp_hit-frame>
      <Hsp_identity>91</Hsp_identity>
      <Hsp_positive>91</Hsp_positive>
      <Hsp_gaps>4</Hsp_gaps>
      <Hsp_align-len>108</Hsp_align-len>
      <Hsp_qseq>ATCGCTTCTCGGCCTTTTGGCTAAGATCAAGTGTAGTATCTGTTCTTATCAGTTTAATATCTGATACGTC--CTCTATCCGAGGACAATATATTAAATGGATTTTTGG</Hsp_qseq>
      <Hsp_hseq>ATCGCTTCTCGGCCTAATGGCTAAGATCAAGTGTAGTATCTGTTCTTATCAGTTTAATATCTGGTACGCCGGCACAGTCC--GGCTCATATATTAATCTGATTTTTGG</Hsp_hseq>
      <Hsp_midline>|||||||||||||||  |||||||||||||||||||||||||||||||||||||||||||||| |||| |  | |  |||  ||   |||||||||   |||||||||</Hsp_midline>
    </Hsp>
    <Hsp>
      <Hsp_num>2</Hsp_num>
      <Hsp_bit-score>77.0278</Hsp_bit-score>
      <Hsp_score>84</Hsp_score>
      <Hsp_evalue>3.77425e-12</Hsp_evalue>
      <Hsp_query-from>1</Hsp_query-from>
      <Hsp_query-to>47</Hsp_query-to>
      <Hsp_hit-from>168</Hsp_hit-from>
      <Hsp_hit-to>122</Hsp_hit-to>
      <Hsp_query-frame>1</Hsp_query-frame>
      <Hsp_hit-frame>-1</Hsp_hit-frame>
      <Hsp_identity>45</Hsp_identity>
      <Hsp_positive>45</Hsp_positive>
      <Hsp_gaps>0</Hsp_gaps>
      <Hsp_align-len>47</Hsp_align-len>
      <Hsp_qseq>ATCGCTTCTCGGCCTTTTGGCTAAGATCAAGTGTAGTATCTGTTCTT</Hsp_qseq>
      <Hsp_hseq>ATCGCTTCTCGGCCTAATGGCTAAGATCAAGTGTAGTATCTGTTCTT</Hsp_hseq>
      <Hsp_midline>|||||||||||||||  ||||||||||||||||||||||||||||||</Hsp_midline>
    </Hsp>
    <Hsp>
      <Hsp_num>3</Hsp_num>
      <Hsp_bit-score>77.0278</Hsp_bit-score>
      <Hsp_score>84</Hsp_score>
      <Hsp_evalue>3.77425e-12</Hsp_evalue>
      <Hsp_query-from>1</Hsp_query-from>
      <Hsp_query-to>47</Hsp_query-to>
      <Hsp_hit-from>2758</Hsp_hit-from>
      <Hsp_hit-to>2712</Hsp_hit-to>
      <Hsp_query-frame>1</Hsp_query-frame>
      <Hsp_hit-frame>-1</Hsp_hit-frame>
      <Hsp_identity>45</Hsp_identity>
      <Hsp_positive>45</Hsp_positive>
      <Hsp_gaps>0</Hsp_gaps>
      <Hsp_align-len>47</Hsp_align-len>
      <Hsp_qseq>ATCGCTTCTCGGCCTTTTGGCTAAGATCAAGTGTAGTATCTGTTCTT</Hsp_qseq>
      <Hsp_hseq>ATCGCTTCTCGGCCTAATGGCTAAGATCAAGTGTAGTATCTGTTCTT</Hsp_hseq>
      <Hsp_midline>|||||||||||||||  ||||||||||||||||||||||||||||||</Hsp_midline>
    </Hsp>
    <Hsp>
      <Hsp_num>4</Hsp_num>
      <Hsp_bit-score>61.6992</Hsp_bit-score>
      <Hsp_score>67</Hsp_score>
      <Hsp_evalue>2.90164e-07</Hsp_evalue>
      <Hsp_query-from>35</Hsp_query-from>
      <Hsp_query-to>106</Hsp_query-to>
      <Hsp_hit-from>868</Hsp_hit-from>
      <Hsp_hit-to>797</Hsp_hit-to>
      <Hsp_query-frame>1</Hsp_query-frame>
      <Hsp_hit-frame>-1</Hsp_hit-frame>
      <Hsp_identity>59</Hsp_identity>
      <Hsp_positive>59</Hsp_positive>
      <Hsp_gaps>4</Hsp_gaps>
      <Hsp_align-len>74</Hsp_align-len>
      <Hsp_qseq>AGTATCTGTTCTTATCAGTTTAATATCTGATACGTC--CTCTATCCGAGGACAATATATTAAATGGATTTTTGG</Hsp_qseq>
      <Hsp_hseq>AGTATCTGTTCTTATCAGTTTAATATCTGGTACGCCGGCACAGTCC--GGCTCATATATTAATCTGATTTTTGG</Hsp_hseq>
      <Hsp_midline>||||||||||||||||||||||||||||| |||| |  | |  |||  ||   |||||||||   |||||||||</Hsp_midline>
    </Hsp>
    <Hsp>
      <Hsp_num>5</Hsp_num>
      <Hsp_bit-score>61.6992</Hsp_bit-score>
      <Hsp_score>67</Hsp_score>
      <Hsp_evalue>2.90164e-07</Hsp_evalue>
      <Hsp_query-from>35</Hsp_query-from>
      <Hsp_query-to>106</Hsp_query-to>
      <Hsp_hit-from>3091</Hsp_hit-from>
      <Hsp_hit-to>3020</Hsp_hit-to>
      <Hsp_query-frame>1</Hsp_query-frame>
      <Hsp_hit-frame>-1</Hsp_hit-frame>
      <Hsp_identity>59</Hsp_identity>
      <Hsp_positive>59</Hsp_positive>
      <Hsp_gaps>4</Hsp_gaps>
      <Hsp_align-len>74</Hsp_align-len>
      <Hsp_qseq>AGTATCTGTTCTTATCAGTTTAATATCTGATACGTC--CTCTATCCGAGGACAATATATTAAATGGATTTTTGG</Hsp_qseq>
      <Hsp_hseq>AGTATCTGTTCTTATCAGTTTAATATCTGGTACGCCGGCACAGTCC--GGCTCATATATTAATCTGATTTTTGG</Hsp_hseq>
      <Hsp_midline>||||||||||||||||||||||||||||| |||| |  | |  |||  ||   |||||||||   |||||||||</Hsp_midline>
    </Hsp>
  </Hit_hsps>
</Hit>
<Hit>
  <Hit_num>50</Hit_num>
  <Hit_id>gi|443572849|ref|NW_004184833.1|</Hit_id>
  <Hit_def>Hydra vulgaris strain 105 unplaced genomic scaffold, Hydra_RP_1.0 HYDRAscaffold_21299</Hit_def>
  <Hit_accession>NW_004184833</Hit_accession>
  <Hit_len>2981</Hit_len>
  <Hit_hsps>
    <Hsp>
      <Hsp_num>1</Hsp_num>
      <Hsp_bit-score>113.997</Hsp_bit-score>
      <Hsp_score>125</Hsp_score>
      <Hsp_evalue>5.24166e-23</Hsp_evalue>
      <Hsp_query-from>1</Hsp_query-from>
      <Hsp_query-to>106</Hsp_query-to>
      <Hsp_hit-from>91</Hsp_hit-from>
      <Hsp_hit-to>196</Hsp_hit-to>
      <Hsp_query-frame>1</Hsp_query-frame>
      <Hsp_hit-frame>1</Hsp_hit-frame>
      <Hsp_identity>91</Hsp_identity>
      <Hsp_positive>91</Hsp_positive>
      <Hsp_gaps>4</Hsp_gaps>
      <Hsp_align-len>108</Hsp_align-len>
      <Hsp_qseq>ATCGCTTCTCGGCCTTTTGGCTAAGATCAAGTGTAGTATCTGTTCTTATCAGTTTAATATCTGATACGTC--CTCTATCCGAGGACAATATATTAAATGGATTTTTGG</Hsp_qseq>
      <Hsp_hseq>ATCGCTTCTCGGCCTAATGGCTAAGATCAAGTGTAGTATCTGTTCTTATCAGTTTAATATCTGGTACGCCGGCACAGTCC--GGCTCATATATTAATCTGATTTTTGG</Hsp_hseq>
      <Hsp_midline>|||||||||||||||  |||||||||||||||||||||||||||||||||||||||||||||| |||| |  | |  |||  ||   |||||||||   |||||||||</Hsp_midline>
    </Hsp>
    <Hsp>
      <Hsp_num>2</Hsp_num>
      <Hsp_bit-score>113.997</Hsp_bit-score>
      <Hsp_score>125</Hsp_score>
      <Hsp_evalue>5.24166e-23</Hsp_evalue>
      <Hsp_query-from>1</Hsp_query-from>
      <Hsp_query-to>106</Hsp_query-to>
      <Hsp_hit-from>458</Hsp_hit-from>
      <Hsp_hit-to>563</Hsp_hit-to>
      <Hsp_query-frame>1</Hsp_query-frame>
      <Hsp_hit-frame>1</Hsp_hit-frame>
      <Hsp_identity>91</Hsp_identity>
      <Hsp_positive>91</Hsp_positive>
      <Hsp_gaps>4</Hsp_gaps>
      <Hsp_align-len>108</Hsp_align-len>
      <Hsp_qseq>ATCGCTTCTCGGCCTTTTGGCTAAGATCAAGTGTAGTATCTGTTCTTATCAGTTTAATATCTGATACGTC--CTCTATCCGAGGACAATATATTAAATGGATTTTTGG</Hsp_qseq>
      <Hsp_hseq>ATCGCTTCTCGGCCTAATGGCTAAGATCAAGTGTAGTATCTGTTCTTATCAGTTTAATATCTGGTACGCCGGCACAGTCC--GGCTCATATATTAATCTGATTTTTGG</Hsp_hseq>
      <Hsp_midline>|||||||||||||||  |||||||||||||||||||||||||||||||||||||||||||||| |||| |  | |  |||  ||   |||||||||   |||||||||</Hsp_midline>
    </Hsp>
    <Hsp>
      <Hsp_num>3</Hsp_num>
      <Hsp_bit-score>77.0278</Hsp_bit-score>
      <Hsp_score>84</Hsp_score>
      <Hsp_evalue>3.77425e-12</Hsp_evalue>
      <Hsp_query-from>1</Hsp_query-from>
      <Hsp_query-to>47</Hsp_query-to>
      <Hsp_hit-from>825</Hsp_hit-from>
      <Hsp_hit-to>871</Hsp_hit-to>
      <Hsp_query-frame>1</Hsp_query-frame>
      <Hsp_hit-frame>1</Hsp_hit-frame>
      <Hsp_identity>45</Hsp_identity>
      <Hsp_positive>45</Hsp_positive>
      <Hsp_gaps>0</Hsp_gaps>
      <Hsp_align-len>47</Hsp_align-len>
      <Hsp_qseq>ATCGCTTCTCGGCCTTTTGGCTAAGATCAAGTGTAGTATCTGTTCTT</Hsp_qseq>
      <Hsp_hseq>ATCGCTTCTCGGCCTAATGGCTAAGATCAAGTGTAGTATCTGTTCTT</Hsp_hseq>
      <Hsp_midline>|||||||||||||||  ||||||||||||||||||||||||||||||</Hsp_midline>
    </Hsp>
    <Hsp>
      <Hsp_num>4</Hsp_num>
      <Hsp_bit-score>61.6992</Hsp_bit-score>
      <Hsp_score>67</Hsp_score>
      <Hsp_evalue>2.90164e-07</Hsp_evalue>
      <Hsp_query-from>35</Hsp_query-from>
      <Hsp_query-to>106</Hsp_query-to>
      <Hsp_hit-from>2720</Hsp_hit-from>
      <Hsp_hit-to>2791</Hsp_hit-to>
      <Hsp_query-frame>1</Hsp_query-frame>
      <Hsp_hit-frame>1</Hsp_hit-frame>
      <Hsp_identity>59</Hsp_identity>
      <Hsp_positive>59</Hsp_positive>
      <Hsp_gaps>4</Hsp_gaps>
      <Hsp_align-len>74</Hsp_align-len>
      <Hsp_qseq>AGTATCTGTTCTTATCAGTTTAATATCTGATACGTC--CTCTATCCGAGGACAATATATTAAATGGATTTTTGG</Hsp_qseq>
      <Hsp_hseq>AGTATCTGTTCTTATCAGTTTAATATCTGGTACGCCGGCACAGTCC--GGCTCATATATTAATCTGATTTTTGG</Hsp_hseq>
      <Hsp_midline>||||||||||||||||||||||||||||| |||| |  | |  |||  ||   |||||||||   |||||||||</Hsp_midline>
    </Hsp>
  </Hit_hsps>
</Hit>
<Hit>
  <Hit_num>51</Hit_num>
  <Hit_id>gi|443571130|ref|NW_004186552.1|</Hit_id>
  <Hit_def>Hydra vulgaris strain 105 unplaced genomic scaffold, Hydra_RP_1.0 HYDRAscaffold_19535</Hit_def>
  <Hit_accession>NW_004186552</Hit_accession>
  <Hit_len>2236</Hit_len>
  <Hit_hsps>
    <Hsp>
      <Hsp_num>1</Hsp_num>
      <Hsp_bit-score>113.997</Hsp_bit-score>
      <Hsp_score>125</Hsp_score>
      <Hsp_evalue>5.24166e-23</Hsp_evalue>
      <Hsp_query-from>1</Hsp_query-from>
      <Hsp_query-to>106</Hsp_query-to>
      <Hsp_hit-from>152</Hsp_hit-from>
      <Hsp_hit-to>257</Hsp_hit-to>
      <Hsp_query-frame>1</Hsp_query-frame>
      <Hsp_hit-frame>1</Hsp_hit-frame>
      <Hsp_identity>91</Hsp_identity>
      <Hsp_positive>91</Hsp_positive>
      <Hsp_gaps>4</Hsp_gaps>
      <Hsp_align-len>108</Hsp_align-len>
      <Hsp_qseq>ATCGCTTCTCGGCCTTTTGGCTAAGATCAAGTGTAGTATCTGTTCTTATCAGTTTAATATCTGATACGTC--CTCTATCCGAGGACAATATATTAAATGGATTTTTGG</Hsp_qseq>
      <Hsp_hseq>ATCGCTTCTCGGCCTAATGGCTAAGATCAAGTGTAGTATCTGTTCTTATCAGTTTAATATCTGGTACGCCGGCACAGTCC--GGCTCATATATTAATCTGATTTTTGG</Hsp_hseq>
      <Hsp_midline>|||||||||||||||  |||||||||||||||||||||||||||||||||||||||||||||| |||| |  | |  |||  ||   |||||||||   |||||||||</Hsp_midline>
    </Hsp>
    <Hsp>
      <Hsp_num>2</Hsp_num>
      <Hsp_bit-score>74.3227</Hsp_bit-score>
      <Hsp_score>81</Hsp_score>
      <Hsp_evalue>4.59798e-11</Hsp_evalue>
      <Hsp_query-from>1</Hsp_query-from>
      <Hsp_query-to>48</Hsp_query-to>
      <Hsp_hit-from>519</Hsp_hit-from>
      <Hsp_hit-to>566</Hsp_hit-to>
      <Hsp_query-frame>1</Hsp_query-frame>
      <Hsp_hit-frame>1</Hsp_hit-frame>
      <Hsp_identity>45</Hsp_identity>
      <Hsp_positive>45</Hsp_positive>
      <Hsp_gaps>0</Hsp_gaps>
      <Hsp_align-len>48</Hsp_align-len>
      <Hsp_qseq>ATCGCTTCTCGGCCTTTTGGCTAAGATCAAGTGTAGTATCTGTTCTTA</Hsp_qseq>
      <Hsp_hseq>ATCGCTTCTCGGCCTAATGGCTAAGATCAAGTGTAGTATCTTTTCTTA</Hsp_hseq>
      <Hsp_midline>|||||||||||||||  |||||||||||||||||||||||| ||||||</Hsp_midline>
    </Hsp>
  </Hit_hsps>
</Hit>
<Hit>
  <Hit_num>52</Hit_num>
  <Hit_id>gi|443570626|ref|NW_004187056.1|</Hit_id>
  <Hit_def>Hydra vulgaris strain 105 unplaced genomic scaffold, Hydra_RP_1.0 HYDRAscaffold_19010</Hit_def>
  <Hit_accession>NW_004187056</Hit_accession>
  <Hit_len>2120</Hit_len>
  <Hit_hsps>
    <Hsp>
      <Hsp_num>1</Hsp_num>
      <Hsp_bit-score>113.997</Hsp_bit-score>
      <Hsp_score>125</Hsp_score>
      <Hsp_evalue>5.24166e-23</Hsp_evalue>
      <Hsp_query-from>1</Hsp_query-from>
      <Hsp_query-to>106</Hsp_query-to>
      <Hsp_hit-from>824</Hsp_hit-from>
      <Hsp_hit-to>929</Hsp_hit-to>
      <Hsp_query-frame>1</Hsp_query-frame>
      <Hsp_hit-frame>1</Hsp_hit-frame>
      <Hsp_identity>91</Hsp_identity>
      <Hsp_positive>91</Hsp_positive>
      <Hsp_gaps>4</Hsp_gaps>
      <Hsp_align-len>108</Hsp_align-len>
      <Hsp_qseq>ATCGCTTCTCGGCCTTTTGGCTAAGATCAAGTGTAGTATCTGTTCTTATCAGTTTAATATCTGATACGTC--CTCTATCCGAGGACAATATATTAAATGGATTTTTGG</Hsp_qseq>
      <Hsp_hseq>ATCGCTTCTCGGCCTAATGGCTAAGATCAAGTGTAGTATCTGTTCTTATCAGTTTAATATCTGGTACGCCGGCACAGTCC--GGCTCATATATTAATCTGATTTTTGG</Hsp_hseq>
      <Hsp_midline>|||||||||||||||  |||||||||||||||||||||||||||||||||||||||||||||| |||| |  | |  |||  ||   |||||||||   |||||||||</Hsp_midline>
    </Hsp>
    <Hsp>
      <Hsp_num>2</Hsp_num>
      <Hsp_bit-score>75.2244</Hsp_bit-score>
      <Hsp_score>82</Hsp_score>
      <Hsp_evalue>1.31734e-11</Hsp_evalue>
      <Hsp_query-from>1</Hsp_query-from>
      <Hsp_query-to>46</Hsp_query-to>
      <Hsp_hit-from>1191</Hsp_hit-from>
      <Hsp_hit-to>1236</Hsp_hit-to>
      <Hsp_query-frame>1</Hsp_query-frame>
      <Hsp_hit-frame>1</Hsp_hit-frame>
      <Hsp_identity>44</Hsp_identity>
      <Hsp_positive>44</Hsp_positive>
      <Hsp_gaps>0</Hsp_gaps>
      <Hsp_align-len>46</Hsp_align-len>
      <Hsp_qseq>ATCGCTTCTCGGCCTTTTGGCTAAGATCAAGTGTAGTATCTGTTCT</Hsp_qseq>
      <Hsp_hseq>ATCGCTTCTCGGCCTAATGGCTAAGATCAAGTGTAGTATCTGTTCT</Hsp_hseq>
      <Hsp_midline>|||||||||||||||  |||||||||||||||||||||||||||||</Hsp_midline>
    </Hsp>
    <Hsp>
      <Hsp_num>3</Hsp_num>
      <Hsp_bit-score>61.6992</Hsp_bit-score>
      <Hsp_score>67</Hsp_score>
      <Hsp_evalue>2.90164e-07</Hsp_evalue>
      <Hsp_query-from>35</Hsp_query-from>
      <Hsp_query-to>106</Hsp_query-to>
      <Hsp_hit-from>491</Hsp_hit-from>
      <Hsp_hit-to>562</Hsp_hit-to>
      <Hsp_query-frame>1</Hsp_query-frame>
      <Hsp_hit-frame>1</Hsp_hit-frame>
      <Hsp_identity>59</Hsp_identity>
      <Hsp_positive>59</Hsp_positive>
      <Hsp_gaps>4</Hsp_gaps>
      <Hsp_align-len>74</Hsp_align-len>
      <Hsp_qseq>AGTATCTGTTCTTATCAGTTTAATATCTGATACGTC--CTCTATCCGAGGACAATATATTAAATGGATTTTTGG</Hsp_qseq>
      <Hsp_hseq>AGTATCTGTTCTTATCAGTTTAATATCTGGTACGCCGGCACAGTCC--GGCTCATATATTAATCTGATTTTTGG</Hsp_hseq>
      <Hsp_midline>||||||||||||||||||||||||||||| |||| |  | |  |||  ||   |||||||||   |||||||||</Hsp_midline>
    </Hsp>
  </Hit_hsps>
</Hit>
<Hit>
  <Hit_num>53</Hit_num>
  <Hit_id>gi|443585865|ref|NW_004171923.1|</Hit_id>
  <Hit_def>Hydra vulgaris strain 105 unplaced genomic scaffold, Hydra_RP_1.0 HYDRAscaffold_34279</Hit_def>
  <Hit_accession>NW_004171923</Hit_accession>
  <Hit_len>53567</Hit_len>
  <Hit_hsps>
    <Hsp>
      <Hsp_num>1</Hsp_num>
      <Hsp_bit-score>110.39</Hsp_bit-score>
      <Hsp_score>121</Hsp_score>
      <Hsp_evalue>6.38565e-22</Hsp_evalue>
      <Hsp_query-from>1</Hsp_query-from>
      <Hsp_query-to>68</Hsp_query-to>
      <Hsp_hit-from>48242</Hsp_hit-from>
      <Hsp_hit-to>48175</Hsp_hit-to>
      <Hsp_query-frame>1</Hsp_query-frame>
      <Hsp_hit-frame>-1</Hsp_hit-frame>
      <Hsp_identity>65</Hsp_identity>
      <Hsp_positive>65</Hsp_positive>
      <Hsp_gaps>0</Hsp_gaps>
      <Hsp_align-len>68</Hsp_align-len>
      <Hsp_qseq>ATCGCTTCTCGGCCTTTTGGCTAAGATCAAGTGTAGTATCTGTTCTTATCAGTTTAATATCTGATACG</Hsp_qseq>
      <Hsp_hseq>ATCGCTTCTCGGCCTAATGGCTAAGATCAAGTGTAGTATCTGTTCTTATCAGTTTAATATCTGGTACG</Hsp_hseq>
      <Hsp_midline>|||||||||||||||  |||||||||||||||||||||||||||||||||||||||||||||| ||||</Hsp_midline>
    </Hsp>
    <Hsp>
      <Hsp_num>2</Hsp_num>
      <Hsp_bit-score>72.5194</Hsp_bit-score>
      <Hsp_score>79</Hsp_score>
      <Hsp_evalue>1.60485e-10</Hsp_evalue>
      <Hsp_query-from>1</Hsp_query-from>
      <Hsp_query-to>47</Hsp_query-to>
      <Hsp_hit-from>12877</Hsp_hit-from>
      <Hsp_hit-to>12831</Hsp_hit-to>
      <Hsp_query-frame>1</Hsp_query-frame>
      <Hsp_hit-frame>-1</Hsp_hit-frame>
      <Hsp_identity>44</Hsp_identity>
      <Hsp_positive>44</Hsp_positive>
      <Hsp_gaps>0</Hsp_gaps>
      <Hsp_align-len>47</Hsp_align-len>
      <Hsp_qseq>ATCGCTTCTCGGCCTTTTGGCTAAGATCAAGTGTAGTATCTGTTCTT</Hsp_qseq>
      <Hsp_hseq>ATTGCTTCTCGGCCTAATGGCTAAGATCAAGTGTAGTATCTGTTCTT</Hsp_hseq>
      <Hsp_midline>|| ||||||||||||  ||||||||||||||||||||||||||||||</Hsp_midline>
    </Hsp>
    <Hsp>
      <Hsp_num>3</Hsp_num>
      <Hsp_bit-score>58.0924</Hsp_bit-score>
      <Hsp_score>63</Hsp_score>
      <Hsp_evalue>3.53492e-06</Hsp_evalue>
      <Hsp_query-from>35</Hsp_query-from>
      <Hsp_query-to>68</Hsp_query-to>
      <Hsp_hit-from>38703</Hsp_hit-from>
      <Hsp_hit-to>38670</Hsp_hit-to>
      <Hsp_query-frame>1</Hsp_query-frame>
      <Hsp_hit-frame>-1</Hsp_hit-frame>
      <Hsp_identity>33</Hsp_identity>
      <Hsp_positive>33</Hsp_positive>
      <Hsp_gaps>0</Hsp_gaps>
      <Hsp_align-len>34</Hsp_align-len>
      <Hsp_qseq>AGTATCTGTTCTTATCAGTTTAATATCTGATACG</Hsp_qseq>
      <Hsp_hseq>AGTATCTGTTCTTATCAGTTTAATATCTGGTACG</Hsp_hseq>
      <Hsp_midline>||||||||||||||||||||||||||||| ||||</Hsp_midline>
    </Hsp>
    <Hsp>
      <Hsp_num>4</Hsp_num>
      <Hsp_bit-score>58.0924</Hsp_bit-score>
      <Hsp_score>63</Hsp_score>
      <Hsp_evalue>3.53492e-06</Hsp_evalue>
      <Hsp_query-from>35</Hsp_query-from>
      <Hsp_query-to>68</Hsp_query-to>
      <Hsp_hit-from>43885</Hsp_hit-from>
      <Hsp_hit-to>43852</Hsp_hit-to>
      <Hsp_query-frame>1</Hsp_query-frame>
      <Hsp_hit-frame>-1</Hsp_hit-frame>
      <Hsp_identity>33</Hsp_identity>
      <Hsp_positive>33</Hsp_positive>
      <Hsp_gaps>0</Hsp_gaps>
      <Hsp_align-len>34</Hsp_align-len>
      <Hsp_qseq>AGTATCTGTTCTTATCAGTTTAATATCTGATACG</Hsp_qseq>
      <Hsp_hseq>AGTATCTGTTCTTATCAGTTTAATATCTGGTACG</Hsp_hseq>
      <Hsp_midline>||||||||||||||||||||||||||||| ||||</Hsp_midline>
    </Hsp>
    <Hsp>
      <Hsp_num>5</Hsp_num>
      <Hsp_bit-score>54.4857</Hsp_bit-score>
      <Hsp_score>59</Hsp_score>
      <Hsp_evalue>4.30642e-05</Hsp_evalue>
      <Hsp_query-from>38</Hsp_query-from>
      <Hsp_query-to>105</Hsp_query-to>
      <Hsp_hit-from>18843</Hsp_hit-from>
      <Hsp_hit-to>18776</Hsp_hit-to>
      <Hsp_query-frame>1</Hsp_query-frame>
      <Hsp_hit-frame>-1</Hsp_hit-frame>
      <Hsp_identity>55</Hsp_identity>
      <Hsp_positive>55</Hsp_positive>
      <Hsp_gaps>4</Hsp_gaps>
      <Hsp_align-len>70</Hsp_align-len>
      <Hsp_qseq>ATCTGTTCTTATCAGTTTAATATCTGATACGTC--CTCTATCCGAGGACAATATATTAAATGGATTTTTG</Hsp_qseq>
      <Hsp_hseq>ATCTGTTCTTATCAGTTTAATATCTGAAACGCCGGCACAGTCC--GGCTCATATATTAATCTGATTTTTG</Hsp_hseq>
      <Hsp_midline>||||||||||||||||||||||||||| ||| |  | |  |||  ||   |||||||||   ||||||||</Hsp_midline>
    </Hsp>
    <Hsp>
      <Hsp_num>6</Hsp_num>
      <Hsp_bit-score>53.584</Hsp_bit-score>
      <Hsp_score>58</Hsp_score>
      <Hsp_evalue>4.30642e-05</Hsp_evalue>
      <Hsp_query-from>35</Hsp_query-from>
      <Hsp_query-to>68</Hsp_query-to>
      <Hsp_hit-from>12542</Hsp_hit-from>
      <Hsp_hit-to>12509</Hsp_hit-to>
      <Hsp_query-frame>1</Hsp_query-frame>
      <Hsp_hit-frame>-1</Hsp_hit-frame>
      <Hsp_identity>32</Hsp_identity>
      <Hsp_positive>32</Hsp_positive>
      <Hsp_gaps>0</Hsp_gaps>
      <Hsp_align-len>34</Hsp_align-len>
      <Hsp_qseq>AGTATCTGTTCTTATCAGTTTAATATCTGATACG</Hsp_qseq>
      <Hsp_hseq>AGTGTCTGTTCTTATCAGTTTAATATCTGGTACG</Hsp_hseq>
      <Hsp_midline>||| ||||||||||||||||||||||||| ||||</Hsp_midline>
    </Hsp>
    <Hsp>
      <Hsp_num>7</Hsp_num>
      <Hsp_bit-score>52.6823</Hsp_bit-score>
      <Hsp_score>57</Hsp_score>
      <Hsp_evalue>0.000150309</Hsp_evalue>
      <Hsp_query-from>1</Hsp_query-from>
      <Hsp_query-to>31</Hsp_query-to>
      <Hsp_hit-from>12209</Hsp_hit-from>
      <Hsp_hit-to>12179</Hsp_hit-to>
      <Hsp_query-frame>1</Hsp_query-frame>
      <Hsp_hit-frame>-1</Hsp_hit-frame>
      <Hsp_identity>30</Hsp_identity>
      <Hsp_positive>30</Hsp_positive>
      <Hsp_gaps>0</Hsp_gaps>
      <Hsp_align-len>31</Hsp_align-len>
      <Hsp_qseq>ATCGCTTCTCGGCCTTTTGGCTAAGATCAAG</Hsp_qseq>
      <Hsp_hseq>ATCGCTTCTCGGCCTTATGGCTAAGATCAAG</Hsp_hseq>
      <Hsp_midline>|||||||||||||||| ||||||||||||||</Hsp_midline>
    </Hsp>
    <Hsp>
      <Hsp_num>8</Hsp_num>
      <Hsp_bit-score>52.6823</Hsp_bit-score>
      <Hsp_score>57</Hsp_score>
      <Hsp_evalue>0.000150309</Hsp_evalue>
      <Hsp_query-from>38</Hsp_query-from>
      <Hsp_query-to>68</Hsp_query-to>
      <Hsp_hit-from>13206</Hsp_hit-from>
      <Hsp_hit-to>13176</Hsp_hit-to>
      <Hsp_query-frame>1</Hsp_query-frame>
      <Hsp_hit-frame>-1</Hsp_hit-frame>
      <Hsp_identity>30</Hsp_identity>
      <Hsp_positive>30</Hsp_positive>
      <Hsp_gaps>0</Hsp_gaps>
      <Hsp_align-len>31</Hsp_align-len>
      <Hsp_qseq>ATCTGTTCTTATCAGTTTAATATCTGATACG</Hsp_qseq>
      <Hsp_hseq>ATCTGTTCTTATCAGTTTAATATCTGGTACG</Hsp_hseq>
      <Hsp_midline>|||||||||||||||||||||||||| ||||</Hsp_midline>
    </Hsp>
    <Hsp>
      <Hsp_num>9</Hsp_num>
      <Hsp_bit-score>52.6823</Hsp_bit-score>
      <Hsp_score>57</Hsp_score>
      <Hsp_evalue>0.000150309</Hsp_evalue>
      <Hsp_query-from>35</Hsp_query-from>
      <Hsp_query-to>106</Hsp_query-to>
      <Hsp_hit-from>28820</Hsp_hit-from>
      <Hsp_hit-to>28749</Hsp_hit-to>
      <Hsp_query-frame>1</Hsp_query-frame>
      <Hsp_hit-frame>-1</Hsp_hit-frame>
      <Hsp_identity>57</Hsp_identity>
      <Hsp_positive>57</Hsp_positive>
      <Hsp_gaps>4</Hsp_gaps>
      <Hsp_align-len>74</Hsp_align-len>
      <Hsp_qseq>AGTATCTGTTCTTATCAGTTTAATATCTGATACGTC--CTCTATCCGAGGACAATATATTAAATGGATTTTTGG</Hsp_qseq>
      <Hsp_hseq>AGTATCTGTTTATATCAGTTTAATATCTGGTACGCCGGCACAGTCC--GGCTCATATATTAATCTGATTTTTGG</Hsp_hseq>
      <Hsp_midline>||||||||||  ||||||||||||||||| |||| |  | |  |||  ||   |||||||||   |||||||||</Hsp_midline>
    </Hsp>
    <Hsp>
      <Hsp_num>10</Hsp_num>
      <Hsp_bit-score>51.7806</Hsp_bit-score>
      <Hsp_score>56</Hsp_score>
      <Hsp_evalue>0.000150309</Hsp_evalue>
      <Hsp_query-from>38</Hsp_query-from>
      <Hsp_query-to>65</Hsp_query-to>
      <Hsp_hit-from>48745</Hsp_hit-from>
      <Hsp_hit-to>48718</Hsp_hit-to>
      <Hsp_query-frame>1</Hsp_query-frame>
      <Hsp_hit-frame>-1</Hsp_hit-frame>
      <Hsp_identity>28</Hsp_identity>
      <Hsp_positive>28</Hsp_positive>
      <Hsp_gaps>0</Hsp_gaps>
      <Hsp_align-len>28</Hsp_align-len>
      <Hsp_qseq>ATCTGTTCTTATCAGTTTAATATCTGAT</Hsp_qseq>
      <Hsp_hseq>ATCTGTTCTTATCAGTTTAATATCTGAT</Hsp_hseq>
      <Hsp_midline>||||||||||||||||||||||||||||</Hsp_midline>
    </Hsp>
    <Hsp>
      <Hsp_num>11</Hsp_num>
      <Hsp_bit-score>43.6655</Hsp_bit-score>
      <Hsp_score>47</Hsp_score>
      <Hsp_evalue>0.0778619</Hsp_evalue>
      <Hsp_query-from>1</Hsp_query-from>
      <Hsp_query-to>31</Hsp_query-to>
      <Hsp_hit-from>18513</Hsp_hit-from>
      <Hsp_hit-to>18483</Hsp_hit-to>
      <Hsp_query-frame>1</Hsp_query-frame>
      <Hsp_hit-frame>-1</Hsp_hit-frame>
      <Hsp_identity>28</Hsp_identity>
      <Hsp_positive>28</Hsp_positive>
      <Hsp_gaps>0</Hsp_gaps>
      <Hsp_align-len>31</Hsp_align-len>
      <Hsp_qseq>ATCGCTTCTCGGCCTTTTGGCTAAGATCAAG</Hsp_qseq>
      <Hsp_hseq>ATCGCGTCTCGGCCTAATGGCTAAGATCAAG</Hsp_hseq>
      <Hsp_midline>||||| |||||||||  ||||||||||||||</Hsp_midline>
    </Hsp>
    <Hsp>
      <Hsp_num>12</Hsp_num>
      <Hsp_bit-score>43.6655</Hsp_bit-score>
      <Hsp_score>47</Hsp_score>
      <Hsp_evalue>0.0778619</Hsp_evalue>
      <Hsp_query-from>1</Hsp_query-from>
      <Hsp_query-to>41</Hsp_query-to>
      <Hsp_hit-from>28493</Hsp_hit-from>
      <Hsp_hit-to>28453</Hsp_hit-to>
      <Hsp_query-frame>1</Hsp_query-frame>
      <Hsp_hit-frame>-1</Hsp_hit-frame>
      <Hsp_identity>34</Hsp_identity>
      <Hsp_positive>34</Hsp_positive>
      <Hsp_gaps>0</Hsp_gaps>
      <Hsp_align-len>41</Hsp_align-len>
      <Hsp_qseq>ATCGCTTCTCGGCCTTTTGGCTAAGATCAAGTGTAGTATCT</Hsp_qseq>
      <Hsp_hseq>ATCGCTTCTCGGCCTAATGGCTAAGATCTTTAGGAGTATCT</Hsp_hseq>
      <Hsp_midline>|||||||||||||||  |||||||||||    | |||||||</Hsp_midline>
    </Hsp>
    <Hsp>
      <Hsp_num>13</Hsp_num>
      <Hsp_bit-score>42.7638</Hsp_bit-score>
      <Hsp_score>46</Hsp_score>
      <Hsp_evalue>0.0778619</Hsp_evalue>
      <Hsp_query-from>1</Hsp_query-from>
      <Hsp_query-to>28</Hsp_query-to>
      <Hsp_hit-from>38376</Hsp_hit-from>
      <Hsp_hit-to>38349</Hsp_hit-to>
      <Hsp_query-frame>1</Hsp_query-frame>
      <Hsp_hit-frame>-1</Hsp_hit-frame>
      <Hsp_identity>26</Hsp_identity>
      <Hsp_positive>26</Hsp_positive>
      <Hsp_gaps>0</Hsp_gaps>
      <Hsp_align-len>28</Hsp_align-len>
      <Hsp_qseq>ATCGCTTCTCGGCCTTTTGGCTAAGATC</Hsp_qseq>
      <Hsp_hseq>ATCGCTTCTCGGCCTAATGGCTAAGATC</Hsp_hseq>
      <Hsp_midline>|||||||||||||||  |||||||||||</Hsp_midline>
    </Hsp>
    <Hsp>
      <Hsp_num>14</Hsp_num>
      <Hsp_bit-score>38.2554</Hsp_bit-score>
      <Hsp_score>41</Hsp_score>
      <Hsp_evalue>3.31077</Hsp_evalue>
      <Hsp_query-from>1</Hsp_query-from>
      <Hsp_query-to>28</Hsp_query-to>
      <Hsp_hit-from>43550</Hsp_hit-from>
      <Hsp_hit-to>43523</Hsp_hit-to>
      <Hsp_query-frame>1</Hsp_query-frame>
      <Hsp_hit-frame>-1</Hsp_hit-frame>
      <Hsp_identity>25</Hsp_identity>
      <Hsp_positive>25</Hsp_positive>
      <Hsp_gaps>0</Hsp_gaps>
      <Hsp_align-len>28</Hsp_align-len>
      <Hsp_qseq>ATCGCTTCTCGGCCTTTTGGCTAAGATC</Hsp_qseq>
      <Hsp_hseq>ATCGCTTCTCGGCCTAATGCCTAAGATC</Hsp_hseq>
      <Hsp_midline>|||||||||||||||  || ||||||||</Hsp_midline>
    </Hsp>
  </Hit_hsps>
</Hit>
<Hit>
  <Hit_num>54</Hit_num>
  <Hit_id>gi|1583122276|ref|NW_021127691.1|</Hit_id>
  <Hit_def>Acropora millepora isolate SF001 unplaced genomic scaffold, amil_sf_1.1 amil.xfSc0000321</Hit_def>
  <Hit_accession>NW_021127691</Hit_accession>
  <Hit_len>42910</Hit_len>
  <Hit_hsps>
    <Hsp>
      <Hsp_num>1</Hsp_num>
      <Hsp_bit-score>102.275</Hsp_bit-score>
      <Hsp_score>112</Hsp_score>
      <Hsp_evalue>9.47714e-20</Hsp_evalue>
      <Hsp_query-from>27</Hsp_query-from>
      <Hsp_query-to>173</Hsp_query-to>
      <Hsp_hit-from>25045</Hsp_hit-from>
      <Hsp_hit-to>25192</Hsp_hit-to>
      <Hsp_query-frame>1</Hsp_query-frame>
      <Hsp_hit-frame>1</Hsp_hit-frame>
      <Hsp_identity>112</Hsp_identity>
      <Hsp_positive>112</Hsp_positive>
      <Hsp_gaps>1</Hsp_gaps>
      <Hsp_align-len>148</Hsp_align-len>
      <Hsp_qseq>TCAAGTGTAGTATCTGTTCTTATCAGTTTAATATCTGATACG-TCCTCTATCCGAGGACAATATATTAAATGGATTTTTGGAGCAGGGAGATGGAATAGGAGCTTGCTCTGTCCACTCCACGCATCGACCTGGTATTGCAGTACCTCC</Hsp_qseq>
      <Hsp_hseq>TCAAGTGTAGTATCTGTTCTTATCAGCTTAATATCTGATACGCTGCTCATTGAGCAGCTCATATATTAAACTGATTTTTGGAACCGGGCTGTGGAAAAGAGGCTTGCCTCGTCCCAGCCACGGGTTGCCTCGGTATAGCACTACCTCC</Hsp_hseq>
      <Hsp_midline>|||||||||||||||||||||||||| ||||||||||||||| | |||  |  |  |   ||||||||||  |||||||||| | |||   ||||| ||  ||||||   ||||   |||||  | | |  ||||| ||| |||||||</Hsp_midline>
    </Hsp>
    <Hsp>
      <Hsp_num>2</Hsp_num>
      <Hsp_bit-score>82.4379</Hsp_bit-score>
      <Hsp_score>90</Hsp_score>
      <Hsp_evalue>8.87619e-14</Hsp_evalue>
      <Hsp_query-from>38</Hsp_query-from>
      <Hsp_query-to>173</Hsp_query-to>
      <Hsp_hit-from>5687</Hsp_hit-from>
      <Hsp_hit-to>5823</Hsp_hit-to>
      <Hsp_query-frame>1</Hsp_query-frame>
      <Hsp_hit-frame>1</Hsp_hit-frame>
      <Hsp_identity>101</Hsp_identity>
      <Hsp_positive>101</Hsp_positive>
      <Hsp_gaps>1</Hsp_gaps>
      <Hsp_align-len>137</Hsp_align-len>
      <Hsp_qseq>ATCTGTTCTTATCAGTTTAATATCTGATACG-TCCTCTATCCGAGGACAATATATTAAATGGATTTTTGGAGCAGGGAGATGGAATAGGAGCTTGCTCTGTCCACTCCACGCATCGACCTGGTATTGCAGTACCTCC</Hsp_qseq>
      <Hsp_hseq>ATCTGTTCTTATCAGCTTAATATCTGATACGCTGCTCATTGAGCAGCTCATATATTAAACTGATTTTTGGAACCGGGCTGTGGAAAAGAGGCTTGCCTCGTCCCAGCCACGGGTTGCCTCGGTATAGCACTACCTCC</Hsp_hseq>
      <Hsp_midline>||||||||||||||| ||||||||||||||| | |||  |  |  |   ||||||||||  |||||||||| | |||   ||||| ||  ||||||   ||||   |||||  | | |  ||||| ||| |||||||</Hsp_midline>
    </Hsp>
    <Hsp>
      <Hsp_num>3</Hsp_num>
      <Hsp_bit-score>82.4379</Hsp_bit-score>
      <Hsp_score>90</Hsp_score>
      <Hsp_evalue>8.87619e-14</Hsp_evalue>
      <Hsp_query-from>38</Hsp_query-from>
      <Hsp_query-to>173</Hsp_query-to>
      <Hsp_hit-from>12605</Hsp_hit-from>
      <Hsp_hit-to>12741</Hsp_hit-to>
      <Hsp_query-frame>1</Hsp_query-frame>
      <Hsp_hit-frame>1</Hsp_hit-frame>
      <Hsp_identity>101</Hsp_identity>
      <Hsp_positive>101</Hsp_positive>
      <Hsp_gaps>1</Hsp_gaps>
      <Hsp_align-len>137</Hsp_align-len>
      <Hsp_qseq>ATCTGTTCTTATCAGTTTAATATCTGATACG-TCCTCTATCCGAGGACAATATATTAAATGGATTTTTGGAGCAGGGAGATGGAATAGGAGCTTGCTCTGTCCACTCCACGCATCGACCTGGTATTGCAGTACCTCC</Hsp_qseq>
      <Hsp_hseq>ATCTGTTCTTATCAGCTTAATATCTGATACGCTGCTCATTGAGCAGCTCATATATTAAACTGATTTTTGGAACCGGGCTGTGGAAAAGAGGCTTGCCTCGTCCCAGCCACGGGTTGCCTCGGTATAGCACTACCTCC</Hsp_hseq>
      <Hsp_midline>||||||||||||||| ||||||||||||||| | |||  |  |  |   ||||||||||  |||||||||| | |||   ||||| ||  ||||||   ||||   |||||  | | |  ||||| ||| |||||||</Hsp_midline>
    </Hsp>
    <Hsp>
      <Hsp_num>4</Hsp_num>
      <Hsp_bit-score>82.4379</Hsp_bit-score>
      <Hsp_score>90</Hsp_score>
      <Hsp_evalue>8.87619e-14</Hsp_evalue>
      <Hsp_query-from>38</Hsp_query-from>
      <Hsp_query-to>173</Hsp_query-to>
      <Hsp_hit-from>39724</Hsp_hit-from>
      <Hsp_hit-to>39860</Hsp_hit-to>
      <Hsp_query-frame>1</Hsp_query-frame>
      <Hsp_hit-frame>1</Hsp_hit-frame>
      <Hsp_identity>101</Hsp_identity>
      <Hsp_positive>101</Hsp_positive>
      <Hsp_gaps>1</Hsp_gaps>
      <Hsp_align-len>137</Hsp_align-len>
      <Hsp_qseq>ATCTGTTCTTATCAGTTTAATATCTGATACG-TCCTCTATCCGAGGACAATATATTAAATGGATTTTTGGAGCAGGGAGATGGAATAGGAGCTTGCTCTGTCCACTCCACGCATCGACCTGGTATTGCAGTACCTCC</Hsp_qseq>
      <Hsp_hseq>ATCTGTTCTTATCAGCTTAATATCTGATACGCTGCTCATTGAGCAGCTCATATATTAAACTGATTTTTGGAACCGGGCTGTGGAAAAGAGGCTTGCCTCGTCCCAGCCACGGGTTGCCTCGGTATAGCACTACCTCC</Hsp_hseq>
      <Hsp_midline>||||||||||||||| ||||||||||||||| | |||  |  |  |   ||||||||||  |||||||||| | |||   ||||| ||  ||||||   ||||   |||||  | | |  ||||| ||| |||||||</Hsp_midline>
    </Hsp>
    <Hsp>
      <Hsp_num>5</Hsp_num>
      <Hsp_bit-score>47.2722</Hsp_bit-score>
      <Hsp_score>51</Hsp_score>
      <Hsp_evalue>0.00639129</Hsp_evalue>
      <Hsp_query-from>1</Hsp_query-from>
      <Hsp_query-to>28</Hsp_query-to>
      <Hsp_hit-from>19800</Hsp_hit-from>
      <Hsp_hit-to>19827</Hsp_hit-to>
      <Hsp_query-frame>1</Hsp_query-frame>
      <Hsp_hit-frame>1</Hsp_hit-frame>
      <Hsp_identity>27</Hsp_identity>
      <Hsp_positive>27</Hsp_positive>
      <Hsp_gaps>0</Hsp_gaps>
      <Hsp_align-len>28</Hsp_align-len>
      <Hsp_qseq>ATCGCTTCTCGGCCTTTTGGCTAAGATC</Hsp_qseq>
      <Hsp_hseq>ATCGCTTCTCGGCCTTTTGGCTAAGTTC</Hsp_hseq>
      <Hsp_midline>||||||||||||||||||||||||| ||</Hsp_midline>
    </Hsp>
    <Hsp>
      <Hsp_num>6</Hsp_num>
      <Hsp_bit-score>47.2722</Hsp_bit-score>
      <Hsp_score>51</Hsp_score>
      <Hsp_evalue>0.00639129</Hsp_evalue>
      <Hsp_query-from>1</Hsp_query-from>
      <Hsp_query-to>28</Hsp_query-to>
      <Hsp_hit-from>33311</Hsp_hit-from>
      <Hsp_hit-to>33338</Hsp_hit-to>
      <Hsp_query-frame>1</Hsp_query-frame>
      <Hsp_hit-frame>1</Hsp_hit-frame>
      <Hsp_identity>27</Hsp_identity>
      <Hsp_positive>27</Hsp_positive>
      <Hsp_gaps>0</Hsp_gaps>
      <Hsp_align-len>28</Hsp_align-len>
      <Hsp_qseq>ATCGCTTCTCGGCCTTTTGGCTAAGATC</Hsp_qseq>
      <Hsp_hseq>ATCGCTTCTCGGCCTTTTGGCTAAGGTC</Hsp_hseq>
      <Hsp_midline>||||||||||||||||||||||||| ||</Hsp_midline>
    </Hsp>
    <Hsp>
      <Hsp_num>7</Hsp_num>
      <Hsp_bit-score>43.6655</Hsp_bit-score>
      <Hsp_score>47</Hsp_score>
      <Hsp_evalue>0.0778619</Hsp_evalue>
      <Hsp_query-from>1</Hsp_query-from>
      <Hsp_query-to>31</Hsp_query-to>
      <Hsp_hit-from>7349</Hsp_hit-from>
      <Hsp_hit-to>7379</Hsp_hit-to>
      <Hsp_query-frame>1</Hsp_query-frame>
      <Hsp_hit-frame>1</Hsp_hit-frame>
      <Hsp_identity>28</Hsp_identity>
      <Hsp_positive>28</Hsp_positive>
      <Hsp_gaps>0</Hsp_gaps>
      <Hsp_align-len>31</Hsp_align-len>
      <Hsp_qseq>ATCGCTTCTCGGCCTTTTGGCTAAGATCAAG</Hsp_qseq>
      <Hsp_hseq>ATCGCTTCTTGGCCTTTTGGCTAAGTTCCAG</Hsp_hseq>
      <Hsp_midline>||||||||| ||||||||||||||| || ||</Hsp_midline>
    </Hsp>
  </Hit_hsps>
</Hit>
<Hit>
  <Hit_num>55</Hit_num>
  <Hit_id>gi|1601958542|ref|NW_021163239.1|</Hit_id>
  <Hit_def>Dendronephthya gigantea isolate DGI-Jeju-01 unplaced genomic scaffold, DenGig_1.0 000229F</Hit_def>
  <Hit_accession>NW_021163239</Hit_accession>
  <Hit_len>197231</Hit_len>
  <Hit_hsps>
    <Hsp>
      <Hsp_num>1</Hsp_num>
      <Hsp_bit-score>101.373</Hsp_bit-score>
      <Hsp_score>111</Hsp_score>
      <Hsp_evalue>3.30785e-19</Hsp_evalue>
      <Hsp_query-from>1</Hsp_query-from>
      <Hsp_query-to>58</Hsp_query-to>
      <Hsp_hit-from>42518</Hsp_hit-from>
      <Hsp_hit-to>42575</Hsp_hit-to>
      <Hsp_query-frame>1</Hsp_query-frame>
      <Hsp_hit-frame>1</Hsp_hit-frame>
      <Hsp_identity>57</Hsp_identity>
      <Hsp_positive>57</Hsp_positive>
      <Hsp_gaps>0</Hsp_gaps>
      <Hsp_align-len>58</Hsp_align-len>
      <Hsp_qseq>ATCGCTTCTCGGCCTTTTGGCTAAGATCAAGTGTAGTATCTGTTCTTATCAGTTTAAT</Hsp_qseq>
      <Hsp_hseq>ATCGCTTCTCGGCCTTTTGGCTAAGATCAAGTGTAGTATCTGTTCTTATCAGCTTAAT</Hsp_hseq>
      <Hsp_midline>|||||||||||||||||||||||||||||||||||||||||||||||||||| |||||</Hsp_midline>
    </Hsp>
    <Hsp>
      <Hsp_num>2</Hsp_num>
      <Hsp_bit-score>87.848</Hsp_bit-score>
      <Hsp_score>96</Hsp_score>
      <Hsp_evalue>2.08748e-15</Hsp_evalue>
      <Hsp_query-from>22</Hsp_query-from>
      <Hsp_query-to>173</Hsp_query-to>
      <Hsp_hit-from>30208</Hsp_hit-from>
      <Hsp_hit-to>30360</Hsp_hit-to>
      <Hsp_query-frame>1</Hsp_query-frame>
      <Hsp_hit-frame>1</Hsp_hit-frame>
      <Hsp_identity>114</Hsp_identity>
      <Hsp_positive>114</Hsp_positive>
      <Hsp_gaps>3</Hsp_gaps>
      <Hsp_align-len>154</Hsp_align-len>
      <Hsp_qseq>TAAGATCAAGTGTAGTATCTGTTCTTATCAGTTTAATATCTGATACG-TCCTCTAT-CCGAGGACAATATATTAAATGGATTTTTGGAGCAGGGAGATGGAATAGGAGCTTGCTCTGTCCACTCCACGCATCGACCTGGTATTGCAGTACCTCC</Hsp_qseq>
      <Hsp_hseq>TAAGATCAAGTGTAGTATCTGTTCTTATCAGCTTAATATCTGATATGTTAGGCAATGCCTAACTC-ATATATTAAACTGATTTTTGGCCTTCGGCCCTGGGATTGAAGCTTGCTTCGCCCTGGCCACGGGTTGTCTCGGTATTGCACTACATCC</Hsp_hseq>
      <Hsp_midline>||||||||||||||||||||||||||||||| ||||||||||||| | |   | || || |   | ||||||||||  |||||||||     ||   ||| || | ||||||||  | ||   |||||  | | |  ||||||||| ||| |||</Hsp_midline>
    </Hsp>
    <Hsp>
      <Hsp_num>3</Hsp_num>
      <Hsp_bit-score>78.8312</Hsp_bit-score>
      <Hsp_score>86</Hsp_score>
      <Hsp_evalue>1.08134e-12</Hsp_evalue>
      <Hsp_query-from>22</Hsp_query-from>
      <Hsp_query-to>173</Hsp_query-to>
      <Hsp_hit-from>68234</Hsp_hit-from>
      <Hsp_hit-to>68386</Hsp_hit-to>
      <Hsp_query-frame>1</Hsp_query-frame>
      <Hsp_hit-frame>1</Hsp_hit-frame>
      <Hsp_identity>112</Hsp_identity>
      <Hsp_positive>112</Hsp_positive>
      <Hsp_gaps>3</Hsp_gaps>
      <Hsp_align-len>154</Hsp_align-len>
      <Hsp_qseq>TAAGATCAAGTGTAGTATCTGTTCTTATCAGTTTAATATCTGATACG-TCCTCTAT-CCGAGGACAATATATTAAATGGATTTTTGGAGCAGGGAGATGGAATAGGAGCTTGCTCTGTCCACTCCACGCATCGACCTGGTATTGCAGTACCTCC</Hsp_qseq>
      <Hsp_hseq>TAAGATCAAGTGTAGTATCTGTTCTTATCACCTTAATATCTGATATGTTAGGCAATGCCTAACTC-ATATATTAAACTGATTTTTGGCCTTCGGCCCTGGGATTGAAGCTTGCTTCCCCCTGGCCATGGGTTGTCTTGGTATTGCACTACATCC</Hsp_hseq>
      <Hsp_midline>||||||||||||||||||||||||||||||  ||||||||||||| | |   | || || |   | ||||||||||  |||||||||     ||   ||| || | ||||||||    ||   ||| |  | | | |||||||||| ||| |||</Hsp_midline>
    </Hsp>
    <Hsp>
      <Hsp_num>4</Hsp_num>
      <Hsp_bit-score>63.5025</Hsp_bit-score>
      <Hsp_score>69</Hsp_score>
      <Hsp_evalue>8.31334e-08</Hsp_evalue>
      <Hsp_query-from>22</Hsp_query-from>
      <Hsp_query-to>58</Hsp_query-to>
      <Hsp_hit-from>64321</Hsp_hit-from>
      <Hsp_hit-to>64357</Hsp_hit-to>
      <Hsp_query-frame>1</Hsp_query-frame>
      <Hsp_hit-frame>1</Hsp_hit-frame>
      <Hsp_identity>36</Hsp_identity>
      <Hsp_positive>36</Hsp_positive>
      <Hsp_gaps>0</Hsp_gaps>
      <Hsp_align-len>37</Hsp_align-len>
      <Hsp_qseq>TAAGATCAAGTGTAGTATCTGTTCTTATCAGTTTAAT</Hsp_qseq>
      <Hsp_hseq>TAAGATCAAGTGTAGTATCTGTTCTTATCAGCTTAAT</Hsp_hseq>
      <Hsp_midline>||||||||||||||||||||||||||||||| |||||</Hsp_midline>
    </Hsp>
    <Hsp>
      <Hsp_num>5</Hsp_num>
      <Hsp_bit-score>58.9941</Hsp_bit-score>
      <Hsp_score>64</Hsp_score>
      <Hsp_evalue>1.01277e-06</Hsp_evalue>
      <Hsp_query-from>38</Hsp_query-from>
      <Hsp_query-to>173</Hsp_query-to>
      <Hsp_hit-from>46963</Hsp_hit-from>
      <Hsp_hit-to>47099</Hsp_hit-to>
      <Hsp_query-frame>1</Hsp_query-frame>
      <Hsp_hit-frame>1</Hsp_hit-frame>
      <Hsp_identity>98</Hsp_identity>
      <Hsp_positive>98</Hsp_positive>
      <Hsp_gaps>3</Hsp_gaps>
      <Hsp_align-len>138</Hsp_align-len>
      <Hsp_qseq>ATCTGTTCTTATCAGTTTAATATCTGATACG-TCCTCTAT-CCGAGGACAATATATTAAATGGATTTTTGGAGCAGGGAGATGGAATAGGAGCTTGCTCTGTCCACTCCACGCATCGACCTGGTATTGCAGTACCTCC</Hsp_qseq>
      <Hsp_hseq>ATCTGTTCTTATCAGCTTAATATCTGATATGTTAGGCAATGCCTAACTC-ATATATTAAACTGATTTTTGGCCTTCGGCCCTGGGATTGAAGCTTGCTTCGCCCTGGCCACGGGTTGTCTCGGTATTGCACTACATCC</Hsp_hseq>
      <Hsp_midline>||||||||||||||| ||||||||||||| | |   | || || |   | ||||||||||  |||||||||     ||   ||| || | ||||||||  | ||   |||||  | | |  ||||||||| ||| |||</Hsp_midline>
    </Hsp>
    <Hsp>
      <Hsp_num>6</Hsp_num>
      <Hsp_bit-score>52.6823</Hsp_bit-score>
      <Hsp_score>57</Hsp_score>
      <Hsp_evalue>0.000150309</Hsp_evalue>
      <Hsp_query-from>39</Hsp_query-from>
      <Hsp_query-to>173</Hsp_query-to>
      <Hsp_hit-from>41043</Hsp_hit-from>
      <Hsp_hit-to>41178</Hsp_hit-to>
      <Hsp_query-frame>1</Hsp_query-frame>
      <Hsp_hit-frame>1</Hsp_hit-frame>
      <Hsp_identity>96</Hsp_identity>
      <Hsp_positive>96</Hsp_positive>
      <Hsp_gaps>3</Hsp_gaps>
      <Hsp_align-len>137</Hsp_align-len>
      <Hsp_qseq>TCTGTTCTTATCAGTTTAATATCTGATACG-TCCTCTAT-CCGAGGACAATATATTAAATGGATTTTTGGAGCAGGGAGATGGAATAGGAGCTTGCTCTGTCCACTCCACGCATCGACCTGGTATTGCAGTACCTCC</Hsp_qseq>
      <Hsp_hseq>TCTGTTCTTATTAGCTTAATATCTGATATGTTAGGCAATGCCTAACTC-ATATATTAAACTGATTTTTGGCCTTCGGCTTTGGGATTGAAGCTTGCTTCGCCCTGGCCACGGGTTGTCTCGGTATTGCACTACATCC</Hsp_hseq>
      <Hsp_midline>||||||||||| || ||||||||||||| | |   | || || |   | ||||||||||  |||||||||     ||   ||| || | ||||||||  | ||   |||||  | | |  ||||||||| ||| |||</Hsp_midline>
    </Hsp>
    <Hsp>
      <Hsp_num>7</Hsp_num>
      <Hsp_bit-score>48.1739</Hsp_bit-score>
      <Hsp_score>52</Hsp_score>
      <Hsp_evalue>0.00183114</Hsp_evalue>
      <Hsp_query-from>1</Hsp_query-from>
      <Hsp_query-to>26</Hsp_query-to>
      <Hsp_hit-from>69732</Hsp_hit-from>
      <Hsp_hit-to>69757</Hsp_hit-to>
      <Hsp_query-frame>1</Hsp_query-frame>
      <Hsp_hit-frame>1</Hsp_hit-frame>
      <Hsp_identity>26</Hsp_identity>
      <Hsp_positive>26</Hsp_positive>
      <Hsp_gaps>0</Hsp_gaps>
      <Hsp_align-len>26</Hsp_align-len>
      <Hsp_qseq>ATCGCTTCTCGGCCTTTTGGCTAAGA</Hsp_qseq>
      <Hsp_hseq>ATCGCTTCTCGGCCTTTTGGCTAAGA</Hsp_hseq>
      <Hsp_midline>||||||||||||||||||||||||||</Hsp_midline>
    </Hsp>
    <Hsp>
      <Hsp_num>8</Hsp_num>
      <Hsp_bit-score>46.3705</Hsp_bit-score>
      <Hsp_score>50</Hsp_score>
      <Hsp_evalue>0.00639129</Hsp_evalue>
      <Hsp_query-from>1</Hsp_query-from>
      <Hsp_query-to>25</Hsp_query-to>
      <Hsp_hit-from>54478</Hsp_hit-from>
      <Hsp_hit-to>54502</Hsp_hit-to>
      <Hsp_query-frame>1</Hsp_query-frame>
      <Hsp_hit-frame>1</Hsp_hit-frame>
      <Hsp_identity>25</Hsp_identity>
      <Hsp_positive>25</Hsp_positive>
      <Hsp_gaps>0</Hsp_gaps>
      <Hsp_align-len>25</Hsp_align-len>
      <Hsp_qseq>ATCGCTTCTCGGCCTTTTGGCTAAG</Hsp_qseq>
      <Hsp_hseq>ATCGCTTCTCGGCCTTTTGGCTAAG</Hsp_hseq>
      <Hsp_midline>|||||||||||||||||||||||||</Hsp_midline>
    </Hsp>
  </Hit_hsps>
</Hit>
<Hit>
  <Hit_num>56</Hit_num>
  <Hit_id>gi|1268736955|ref|NW_019218988.1|</Hit_id>
  <Hit_def>Stylophora pistillata isolate CSM Monaco unplaced genomic scaffold, Stylophora pistillata v1 Spis.scaffold1205</Hit_def>
  <Hit_accession>NW_019218988</Hit_accession>
  <Hit_len>51352</Hit_len>
  <Hit_hsps>
    <Hsp>
      <Hsp_num>1</Hsp_num>
      <Hsp_bit-score>100.472</Hsp_bit-score>
      <Hsp_score>110</Hsp_score>
      <Hsp_evalue>3.30785e-19</Hsp_evalue>
      <Hsp_query-from>4</Hsp_query-from>
      <Hsp_query-to>68</Hsp_query-to>
      <Hsp_hit-from>8890</Hsp_hit-from>
      <Hsp_hit-to>8954</Hsp_hit-to>
      <Hsp_query-frame>1</Hsp_query-frame>
      <Hsp_hit-frame>1</Hsp_hit-frame>
      <Hsp_identity>61</Hsp_identity>
      <Hsp_positive>61</Hsp_positive>
      <Hsp_gaps>0</Hsp_gaps>
      <Hsp_align-len>65</Hsp_align-len>
      <Hsp_qseq>GCTTCTCGGCCTTTTGGCTAAGATCAAGTGTAGTATCTGTTCTTATCAGTTTAATATCTGATACG</Hsp_qseq>
      <Hsp_hseq>GCTTCTCGGCCTTTTGGCTAAGATCAAGTGTAGTATCTGTTTTTATCAGCTTAATACCCGATACG</Hsp_hseq>
      <Hsp_midline>||||||||||||||||||||||||||||||||||||||||| ||||||| |||||| | ||||||</Hsp_midline>
    </Hsp>
  </Hit_hsps>
</Hit>
<Hit>
  <Hit_num>57</Hit_num>
  <Hit_id>gi|156603157|ref|NW_001828859.1|</Hit_id>
  <Hit_def>Nematostella vectensis NEMVEscaffold_6083 genomic scaffold, whole genome shotgun sequence</Hit_def>
  <Hit_accession>NW_001828859</Hit_accession>
  <Hit_len>6730</Hit_len>
  <Hit_hsps>
    <Hsp>
      <Hsp_num>1</Hsp_num>
      <Hsp_bit-score>91.4547</Hsp_bit-score>
      <Hsp_score>100</Hsp_score>
      <Hsp_evalue>1.71351e-16</Hsp_evalue>
      <Hsp_query-from>1</Hsp_query-from>
      <Hsp_query-to>50</Hsp_query-to>
      <Hsp_hit-from>349</Hsp_hit-from>
      <Hsp_hit-to>398</Hsp_hit-to>
      <Hsp_query-frame>1</Hsp_query-frame>
      <Hsp_hit-frame>1</Hsp_hit-frame>
      <Hsp_identity>50</Hsp_identity>
      <Hsp_positive>50</Hsp_positive>
      <Hsp_gaps>0</Hsp_gaps>
      <Hsp_align-len>50</Hsp_align-len>
      <Hsp_qseq>ATCGCTTCTCGGCCTTTTGGCTAAGATCAAGTGTAGTATCTGTTCTTATC</Hsp_qseq>
      <Hsp_hseq>ATCGCTTCTCGGCCTTTTGGCTAAGATCAAGTGTAGTATCTGTTCTTATC</Hsp_hseq>
      <Hsp_midline>||||||||||||||||||||||||||||||||||||||||||||||||||</Hsp_midline>
    </Hsp>
    <Hsp>
      <Hsp_num>2</Hsp_num>
      <Hsp_bit-score>86.0446</Hsp_bit-score>
      <Hsp_score>94</Hsp_score>
      <Hsp_evalue>7.28602e-15</Hsp_evalue>
      <Hsp_query-from>35</Hsp_query-from>
      <Hsp_query-to>173</Hsp_query-to>
      <Hsp_hit-from>6119</Hsp_hit-from>
      <Hsp_hit-to>6259</Hsp_hit-to>
      <Hsp_query-frame>1</Hsp_query-frame>
      <Hsp_hit-frame>1</Hsp_hit-frame>
      <Hsp_identity>105</Hsp_identity>
      <Hsp_positive>105</Hsp_positive>
      <Hsp_gaps>2</Hsp_gaps>
      <Hsp_align-len>141</Hsp_align-len>
      <Hsp_qseq>AGTATCTGTTCTTATCAGTTTAATATCTGATACG-TCCTCTATCCGAGGACAATATATTAAATGGATTTTTGGAGCAGGGAGATGGAAT-AGGAGCTTGCTCTGTCCACTCCACGCATCGACCTGGTATTGCAGTACCTCC</Hsp_qseq>
      <Hsp_hseq>AGTATCTGTTCTTATCAGCTTAATATCTGATACGCTGCTCATTGAGTAGCTCATATATTAAACTGATTTTTGGAAACTGGCTGTGGAATAAGCGGCTTGCTGCGTCCCAGCCACGGGTTGTCTCGGTATTGCACTACCTCC</Hsp_hseq>
      <Hsp_midline>|||||||||||||||||| ||||||||||||||| | |||  |  |  |   ||||||||||  ||||||||||    ||   |||||| ||  |||||||  ||||   |||||  | | |  ||||||||| |||||||</Hsp_midline>
    </Hsp>
  </Hit_hsps>
</Hit>
<Hit>
  <Hit_num>58</Hit_num>
  <Hit_id>gi|156347579|ref|NW_001833487.1|</Hit_id>
  <Hit_def>Nematostella vectensis NEMVEscaffold_927 genomic scaffold, whole genome shotgun sequence</Hit_def>
  <Hit_accession>NW_001833487</Hit_accession>
  <Hit_len>43402</Hit_len>
  <Hit_hsps>
    <Hsp>
      <Hsp_num>1</Hsp_num>
      <Hsp_bit-score>91.4547</Hsp_bit-score>
      <Hsp_score>100</Hsp_score>
      <Hsp_evalue>1.71351e-16</Hsp_evalue>
      <Hsp_query-from>1</Hsp_query-from>
      <Hsp_query-to>50</Hsp_query-to>
      <Hsp_hit-from>7648</Hsp_hit-from>
      <Hsp_hit-to>7599</Hsp_hit-to>
      <Hsp_query-frame>1</Hsp_query-frame>
      <Hsp_hit-frame>-1</Hsp_hit-frame>
      <Hsp_identity>50</Hsp_identity>
      <Hsp_positive>50</Hsp_positive>
      <Hsp_gaps>0</Hsp_gaps>
      <Hsp_align-len>50</Hsp_align-len>
      <Hsp_qseq>ATCGCTTCTCGGCCTTTTGGCTAAGATCAAGTGTAGTATCTGTTCTTATC</Hsp_qseq>
      <Hsp_hseq>ATCGCTTCTCGGCCTTTTGGCTAAGATCAAGTGTAGTATCTGTTCTTATC</Hsp_hseq>
      <Hsp_midline>||||||||||||||||||||||||||||||||||||||||||||||||||</Hsp_midline>
    </Hsp>
    <Hsp>
      <Hsp_num>2</Hsp_num>
      <Hsp_bit-score>91.4547</Hsp_bit-score>
      <Hsp_score>100</Hsp_score>
      <Hsp_evalue>1.71351e-16</Hsp_evalue>
      <Hsp_query-from>1</Hsp_query-from>
      <Hsp_query-to>50</Hsp_query-to>
      <Hsp_hit-from>9226</Hsp_hit-from>
      <Hsp_hit-to>9177</Hsp_hit-to>
      <Hsp_query-frame>1</Hsp_query-frame>
      <Hsp_hit-frame>-1</Hsp_hit-frame>
      <Hsp_identity>50</Hsp_identity>
      <Hsp_positive>50</Hsp_positive>
      <Hsp_gaps>0</Hsp_gaps>
      <Hsp_align-len>50</Hsp_align-len>
      <Hsp_qseq>ATCGCTTCTCGGCCTTTTGGCTAAGATCAAGTGTAGTATCTGTTCTTATC</Hsp_qseq>
      <Hsp_hseq>ATCGCTTCTCGGCCTTTTGGCTAAGATCAAGTGTAGTATCTGTTCTTATC</Hsp_hseq>
      <Hsp_midline>||||||||||||||||||||||||||||||||||||||||||||||||||</Hsp_midline>
    </Hsp>
    <Hsp>
      <Hsp_num>3</Hsp_num>
      <Hsp_bit-score>76.1261</Hsp_bit-score>
      <Hsp_score>83</Hsp_score>
      <Hsp_evalue>1.31734e-11</Hsp_evalue>
      <Hsp_query-from>35</Hsp_query-from>
      <Hsp_query-to>173</Hsp_query-to>
      <Hsp_hit-from>1508</Hsp_hit-from>
      <Hsp_hit-to>1365</Hsp_hit-to>
      <Hsp_query-frame>1</Hsp_query-frame>
      <Hsp_hit-frame>-1</Hsp_hit-frame>
      <Hsp_identity>106</Hsp_identity>
      <Hsp_positive>106</Hsp_positive>
      <Hsp_gaps>5</Hsp_gaps>
      <Hsp_align-len>144</Hsp_align-len>
      <Hsp_qseq>AGTATCTGTTCTTATCAGTTTAATATCTGATACG-TCCTCTATCCGAGGACAATATATTAAATGGATTTTTGG-AGCAGGGAGATGGAATA--GGAGCTTGCTCTGTCCAC-TCCACGCATCGACCTGGTATTGCAGTACCTCC</Hsp_qseq>
      <Hsp_hseq>AGTATCTGTTCTTATCAGCTTAATATCTGATACGCTGCTCATTGAGTAGCTCATATATTAAACTGATTTTTGGAAACTGGCCTGTGGAATAAGCGGGCTTGCTGCGTCCCCAGCCACGGGTGGTCTCGGTATTGCACTACTTCC</Hsp_hseq>
      <Hsp_midline>|||||||||||||||||| ||||||||||||||| | |||  |  |  |   ||||||||||  ||||||||| | | ||    |||||||   | |||||||  |||| |  |||||  | | |  ||||||||| ||| |||</Hsp_midline>
    </Hsp>
  </Hit_hsps>
</Hit>
<Hit>
  <Hit_num>59</Hit_num>
  <Hit_id>gi|156344568|ref|NW_001833042.1|</Hit_id>
  <Hit_def>Nematostella vectensis NEMVEscaffold_1464 genomic scaffold, whole genome shotgun sequence</Hit_def>
  <Hit_accession>NW_001833042</Hit_accession>
  <Hit_len>28313</Hit_len>
  <Hit_hsps>
    <Hsp>
      <Hsp_num>1</Hsp_num>
      <Hsp_bit-score>91.4547</Hsp_bit-score>
      <Hsp_score>100</Hsp_score>
      <Hsp_evalue>1.71351e-16</Hsp_evalue>
      <Hsp_query-from>1</Hsp_query-from>
      <Hsp_query-to>50</Hsp_query-to>
      <Hsp_hit-from>17637</Hsp_hit-from>
      <Hsp_hit-to>17686</Hsp_hit-to>
      <Hsp_query-frame>1</Hsp_query-frame>
      <Hsp_hit-frame>1</Hsp_hit-frame>
      <Hsp_identity>50</Hsp_identity>
      <Hsp_positive>50</Hsp_positive>
      <Hsp_gaps>0</Hsp_gaps>
      <Hsp_align-len>50</Hsp_align-len>
      <Hsp_qseq>ATCGCTTCTCGGCCTTTTGGCTAAGATCAAGTGTAGTATCTGTTCTTATC</Hsp_qseq>
      <Hsp_hseq>ATCGCTTCTCGGCCTTTTGGCTAAGATCAAGTGTAGTATCTGTTCTTATC</Hsp_hseq>
      <Hsp_midline>||||||||||||||||||||||||||||||||||||||||||||||||||</Hsp_midline>
    </Hsp>
  </Hit_hsps>
</Hit>
<Hit>
  <Hit_num>60</Hit_num>
  <Hit_id>gi|1190470030|ref|NW_018384183.1|</Hit_id>
  <Hit_def>Exaiptasia pallida isolate CC7 unplaced genomic scaffold, Aiptasia genome 1.1 scaffold1072</Hit_def>
  <Hit_accession>NW_018384183</Hit_accession>
  <Hit_len>24971</Hit_len>
  <Hit_hsps>
    <Hsp>
      <Hsp_num>1</Hsp_num>
      <Hsp_bit-score>89.6514</Hsp_bit-score>
      <Hsp_score>98</Hsp_score>
      <Hsp_evalue>5.98073e-16</Hsp_evalue>
      <Hsp_query-from>38</Hsp_query-from>
      <Hsp_query-to>173</Hsp_query-to>
      <Hsp_hit-from>4131</Hsp_hit-from>
      <Hsp_hit-to>4267</Hsp_hit-to>
      <Hsp_query-frame>1</Hsp_query-frame>
      <Hsp_hit-frame>1</Hsp_hit-frame>
      <Hsp_identity>106</Hsp_identity>
      <Hsp_positive>106</Hsp_positive>
      <Hsp_gaps>5</Hsp_gaps>
      <Hsp_align-len>139</Hsp_align-len>
      <Hsp_qseq>ATCTGTTCTTATCAGTTTAATATCTGATACG-TCCTCTATCCGAG--GACAATATATTAAATGGATTTTTGGAGCAGGGAGATGGAATAGGAGCTTGCTCTGTCCACTCCACGCATCGACCTGGTATTGCAGTACCTCC</Hsp_qseq>
      <Hsp_hseq>ATCTGTTCTTATCAGCTTAATATCTGATACGCTGCTC-AT-CGAGTAGCTCATATATTAAACTGATTTTTGGAACTGGGCTGTGGAAAAGAGGCTTGCCTCGTCCCAGCCACGGGTTGTCTCGGTATTGCACTACCTCC</Hsp_hseq>
      <Hsp_midline>||||||||||||||| ||||||||||||||| | ||| || ||||  |   ||||||||||  |||||||||| | |||   ||||| ||  ||||||   ||||   |||||  | | |  ||||||||| |||||||</Hsp_midline>
    </Hsp>
    <Hsp>
      <Hsp_num>2</Hsp_num>
      <Hsp_bit-score>89.6514</Hsp_bit-score>
      <Hsp_score>98</Hsp_score>
      <Hsp_evalue>5.98073e-16</Hsp_evalue>
      <Hsp_query-from>38</Hsp_query-from>
      <Hsp_query-to>173</Hsp_query-to>
      <Hsp_hit-from>6666</Hsp_hit-from>
      <Hsp_hit-to>6802</Hsp_hit-to>
      <Hsp_query-frame>1</Hsp_query-frame>
      <Hsp_hit-frame>1</Hsp_hit-frame>
      <Hsp_identity>106</Hsp_identity>
      <Hsp_positive>106</Hsp_positive>
      <Hsp_gaps>5</Hsp_gaps>
      <Hsp_align-len>139</Hsp_align-len>
      <Hsp_qseq>ATCTGTTCTTATCAGTTTAATATCTGATACG-TCCTCTATCCGAG--GACAATATATTAAATGGATTTTTGGAGCAGGGAGATGGAATAGGAGCTTGCTCTGTCCACTCCACGCATCGACCTGGTATTGCAGTACCTCC</Hsp_qseq>
      <Hsp_hseq>ATCTGTTCTTATCAGCTTAATATCTGATACGCTGCTC-AT-CGAGTAGCTCATATATTAAACTGATTTTTGGAACTGGGCTGTGGAAAAGAGGCTTGCCTCGTCCCAGCCACGGGTTGTCTCGGTATTGCACTACCTCC</Hsp_hseq>
[truncated: 113,685 more chars]
